# Supplementary material for: The Monogenean Which Lost Its Clamps
Source: PubMed Central journal article supplement (PMC3838368; doi:10.1371/journal.pone.0079155), 2013-11-22

## The monogenean which lost its clamps

### Supplementary Information file

**120 line drawings; for each drawing are indicated:**

Family

Species

Body Surface (in  $\mu\text{m}^2$ )

Clamp Surface (in  $\mu\text{m}^2$ )

Ratio

Reference

**Jean-Lou Justine<sup>1\*</sup>, Chahrazed Rahmouni<sup>1</sup>, Delphine Gey<sup>2</sup>, Charlotte Schoelinck<sup>1,3</sup>,**

**Eric P. Hoberg<sup>4</sup>**

<sup>1</sup> UMR 7138 "Systématique, Adaptation, Évolution", Muséum National d'Histoire Naturelle, CP 51, 55 rue Buffon, 75231 Paris cedex 05, France

<sup>2</sup> UMS 2700 Service de Systématique moléculaire, Muséum National d'Histoire Naturelle, CP 26, 57 rue Cuvier, 75231 Paris cedex 05, France

<sup>3</sup> Molecular Biology, Aquatic Animal Health, Fisheries and Oceans Canada, 343, Avenue de l'Université, Moncton N.B. E1C 9B6, Canada

<sup>4</sup> US National Parasite Collection, USDA, Agricultural Research Service, BARC East No. 1180, 10300 Baltimore Avenue, Beltsville, MD, 20705, USA

\* Corresponding author. email: [justine@mnhn.fr](mailto:justine@mnhn.fr)

Family: Allodiscocotyliidae

Species: *Allodiscocotyla chorinemi* Yamaguti, 1953

Body Surface: 221,079

Clamp Surface: 23,301

Ratio: 10.54

Reference: Yamaguti, 1963, p. 547

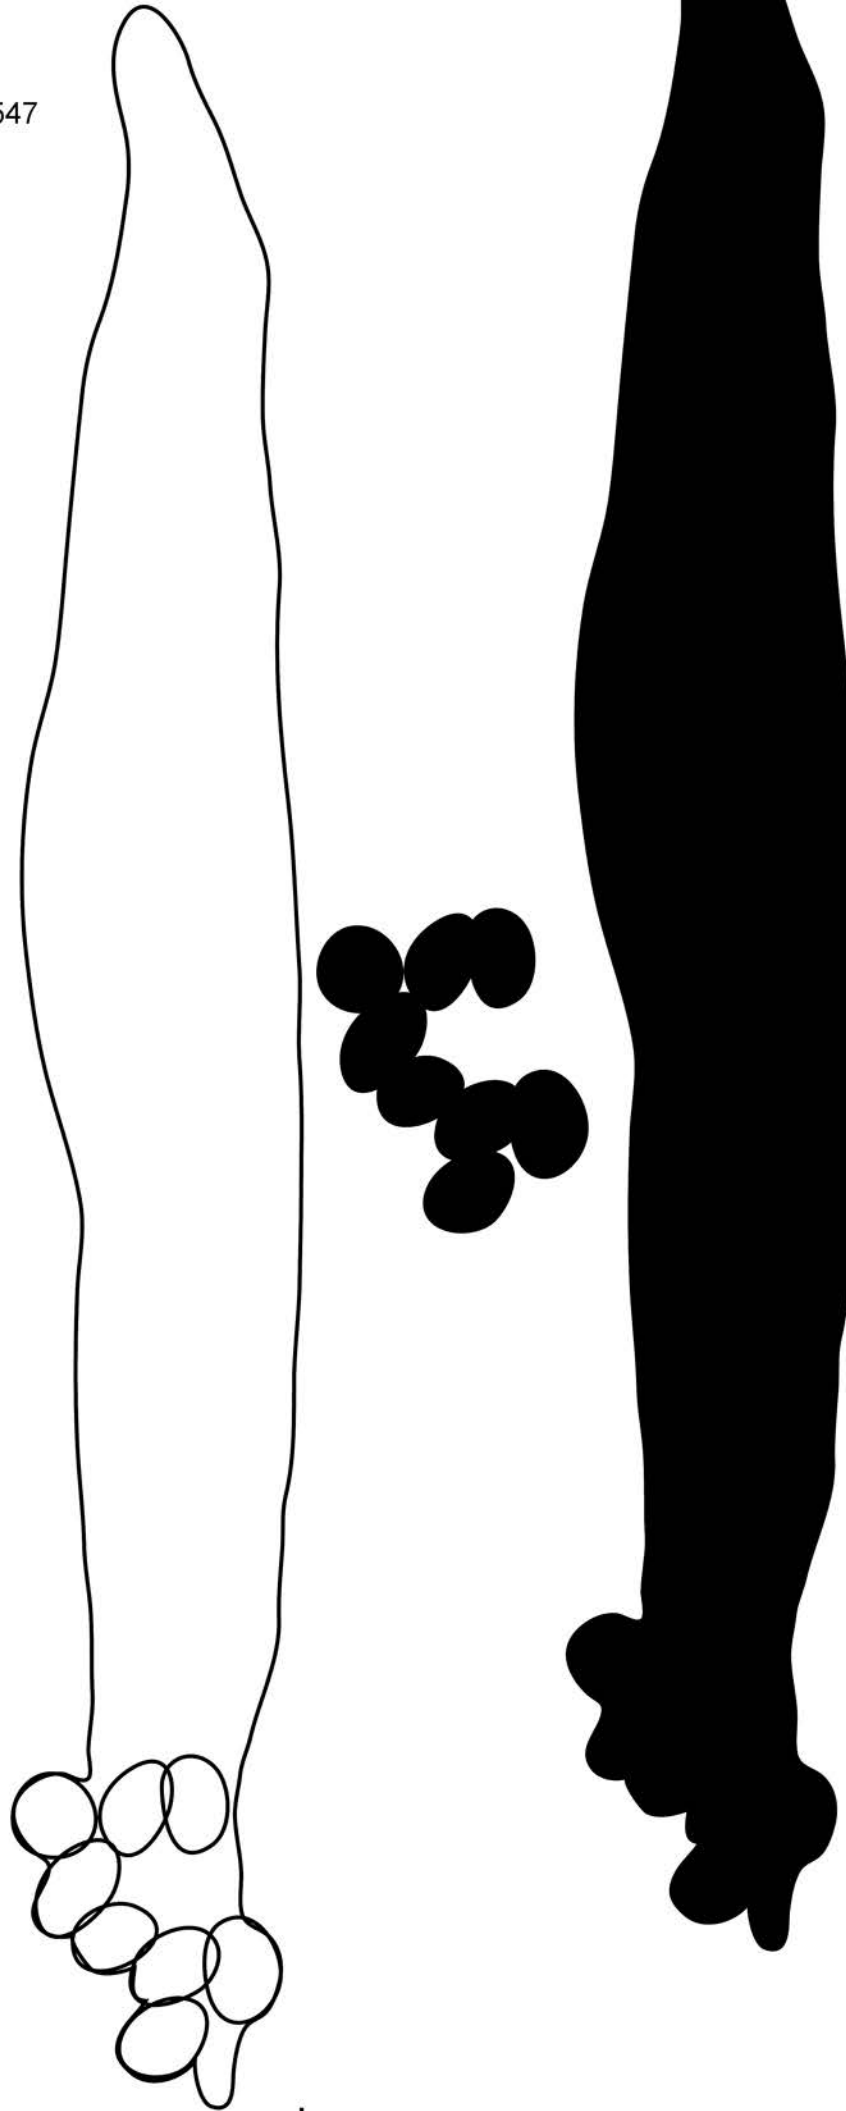

0.2 mm

Family: Allodiscocotylidae  
Species: *Allodiscocotyla diacanthi* Unnithan, 1962  
Body Surface: 891,326  
Clamp Surface: 53,724  
Ratio: 6.03  
Reference: Yamaguti, 1963, p. 547

0.5 mm

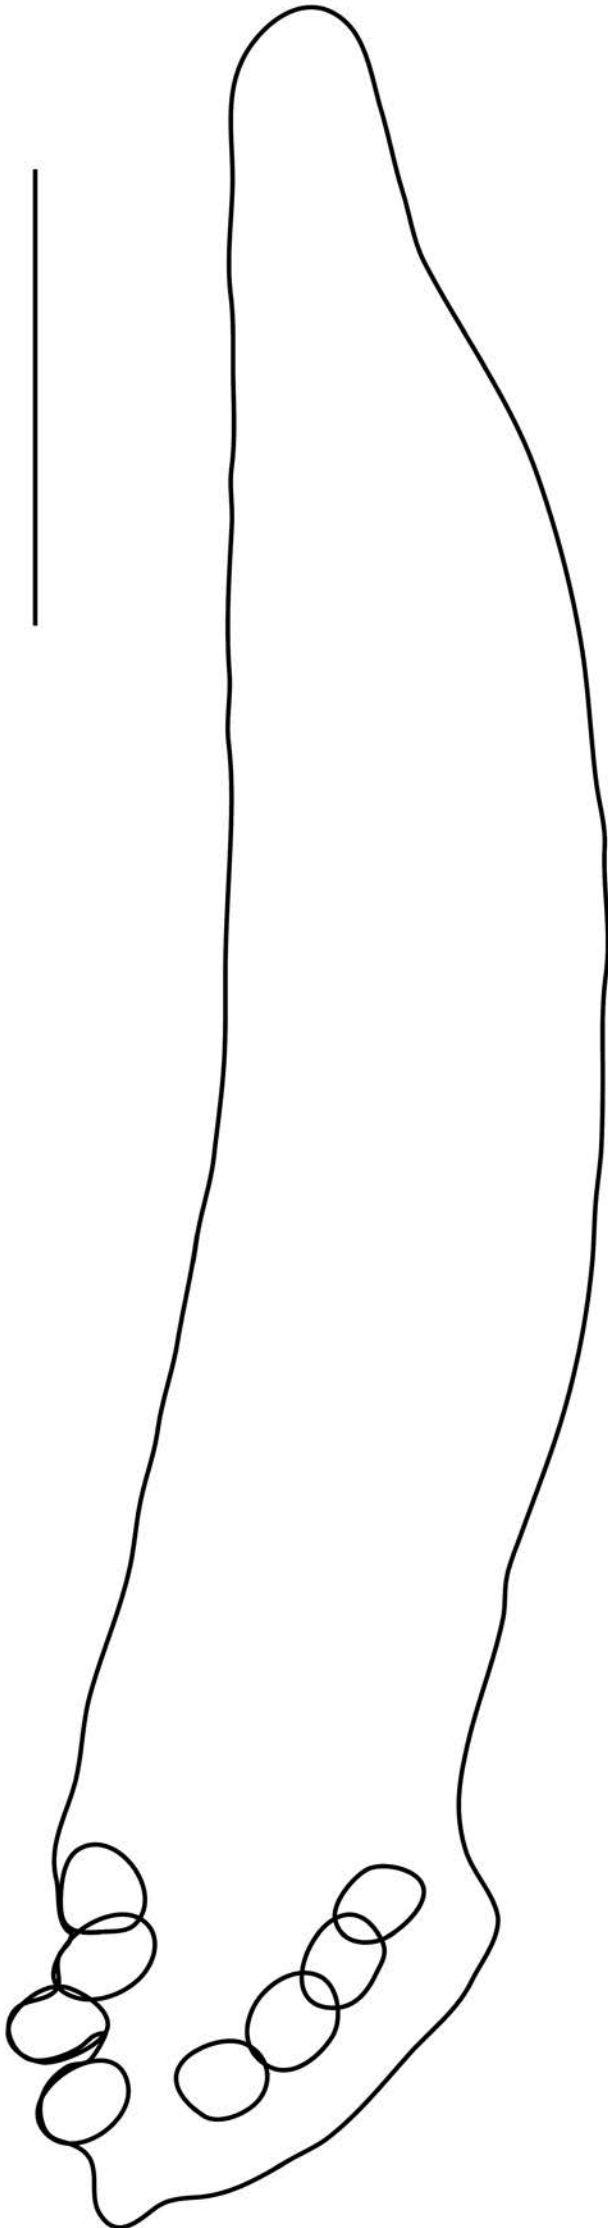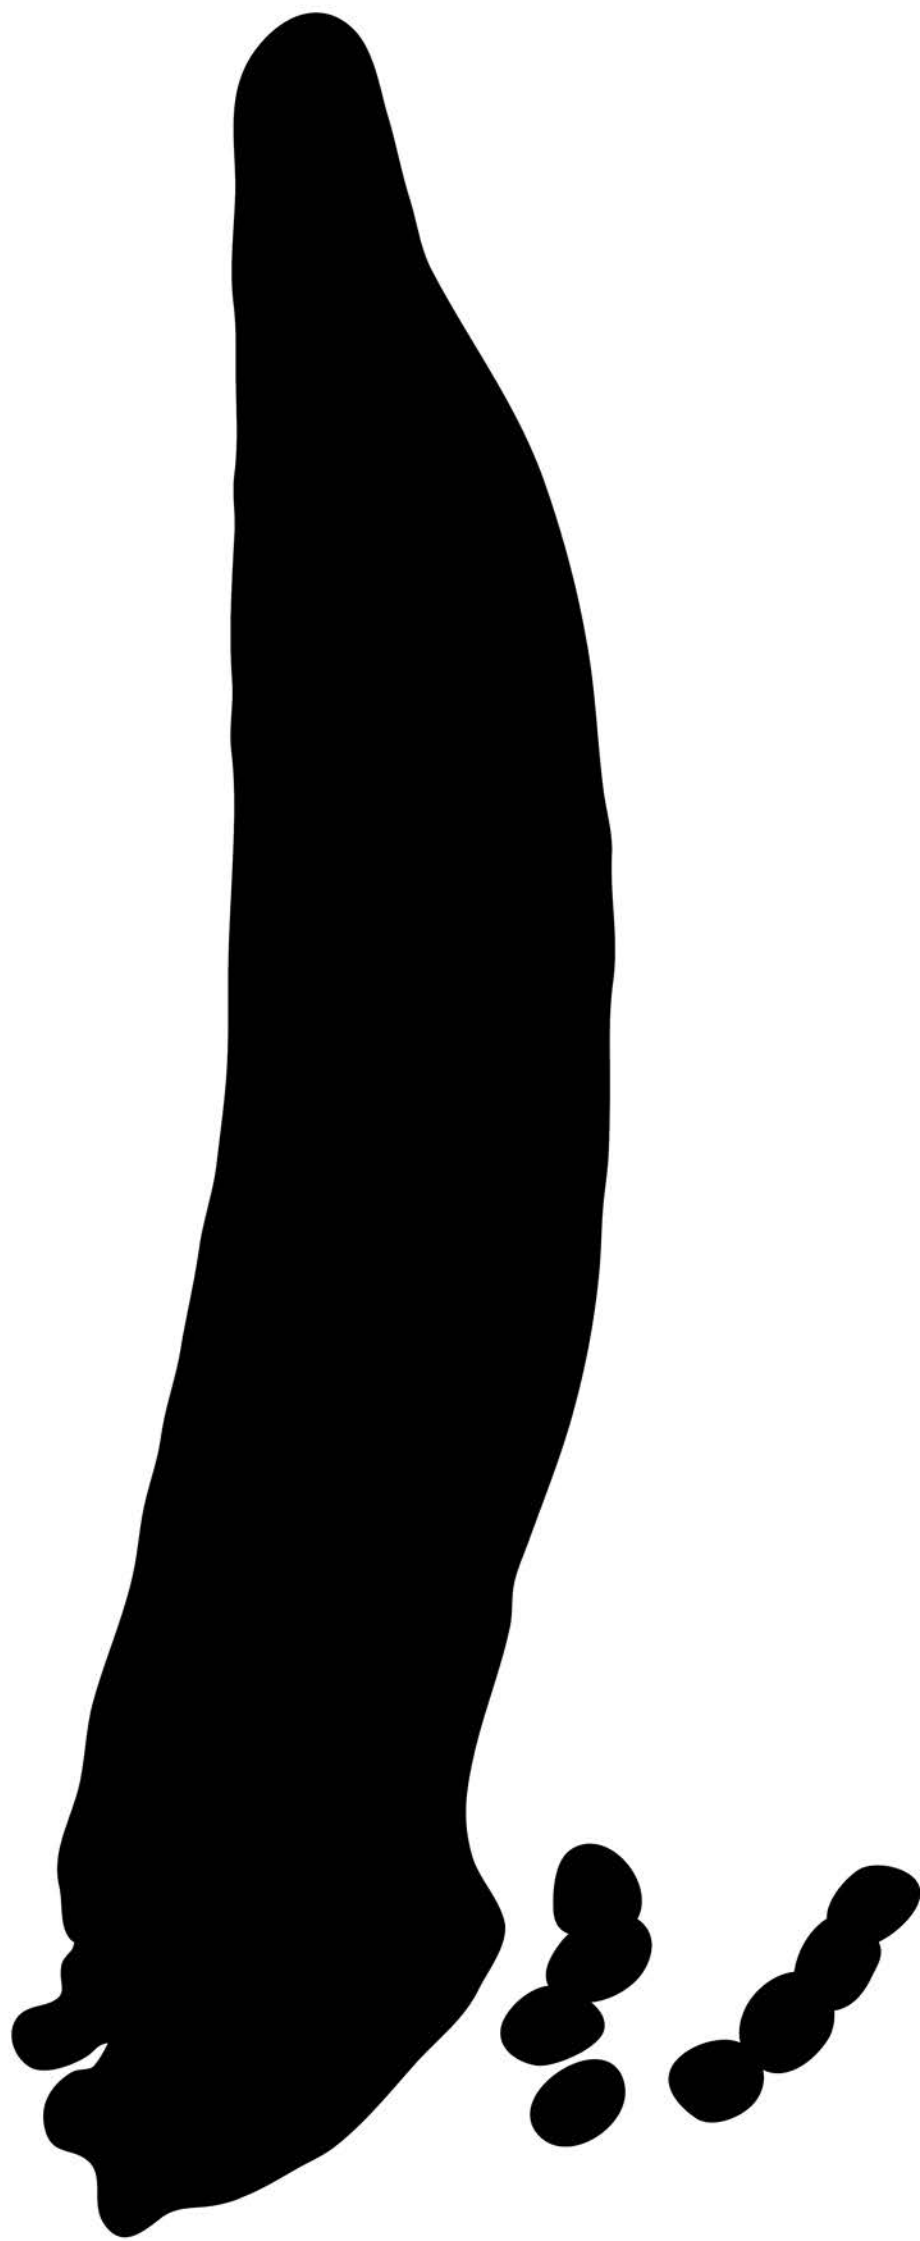

Family: Allodiscocotyliidae

Species: *Allodiscocotyla lae* Yamaguti, 1968

Body Surface: 525,572

Clamp Surface: 13,728

Ratio: 2.61

Reference: Yamaguti, 1968, p. 251

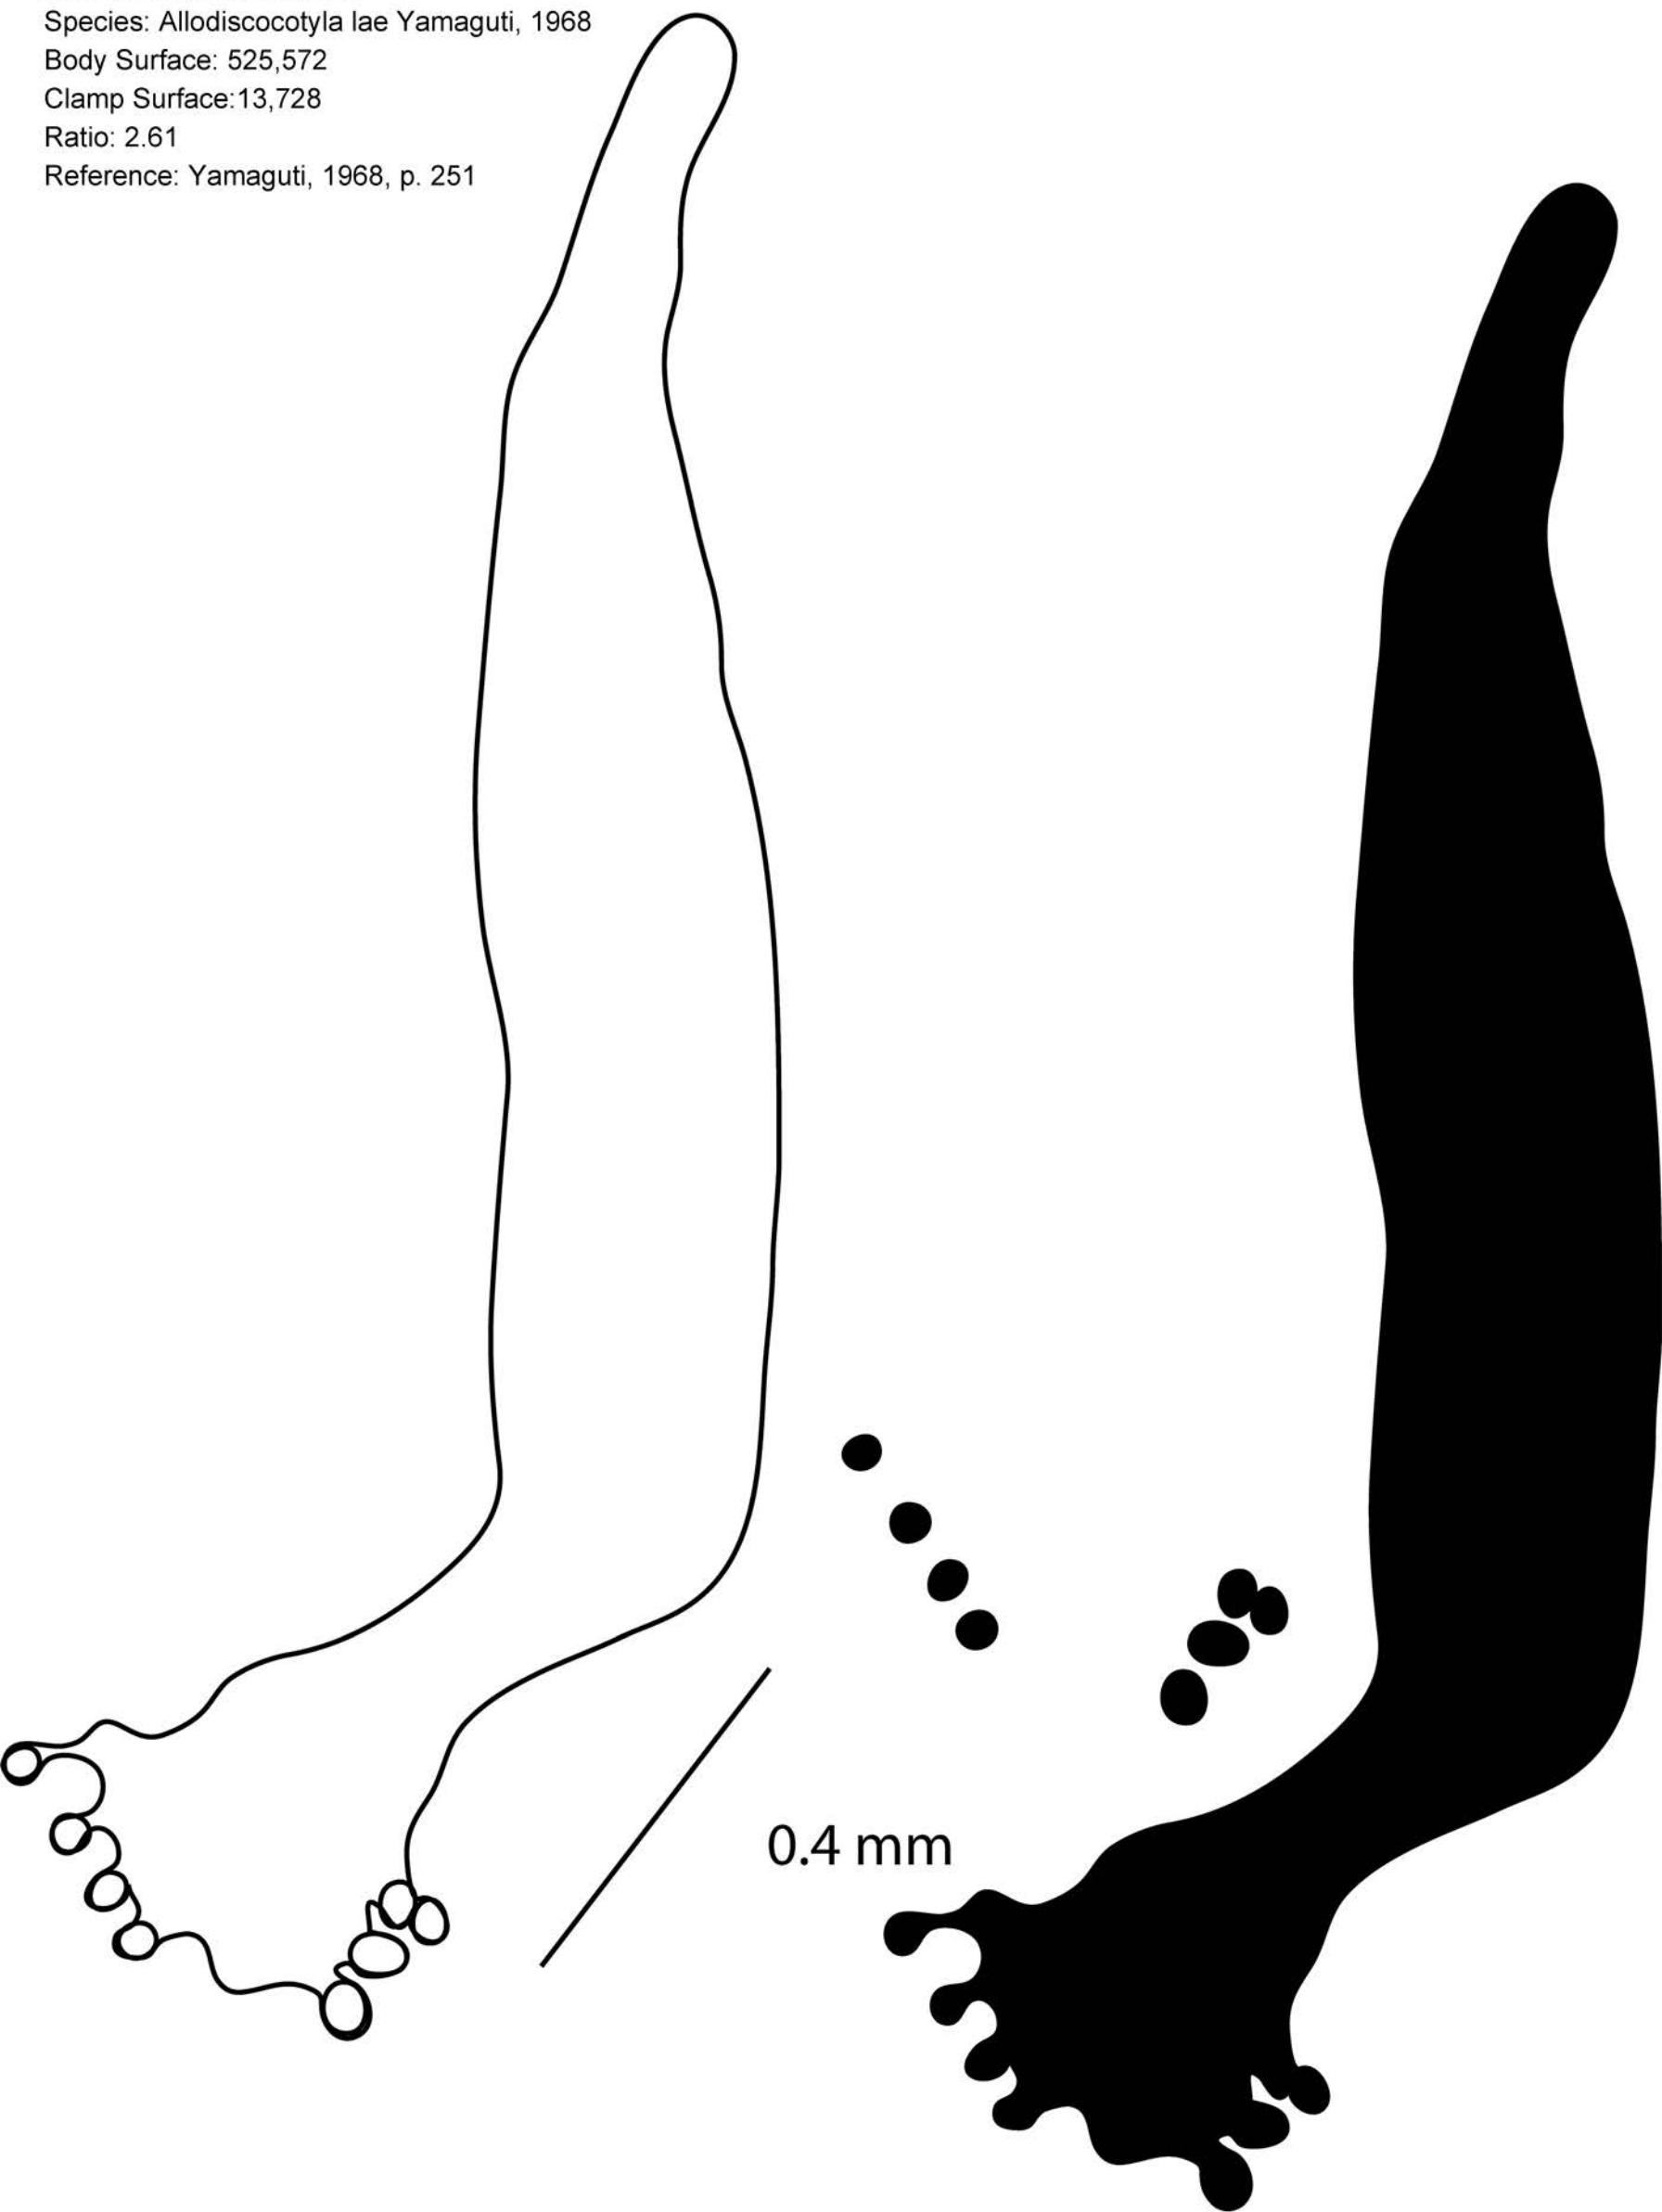

Family: Allodiscocotyliidae

Species: *Camopia rachycentri* Lebedev, 1970

Body Surface: 12,492,318

Clamp Surface: 150,559

Ratio: 1.21

Reference: Lebedev, 1986, p. 152

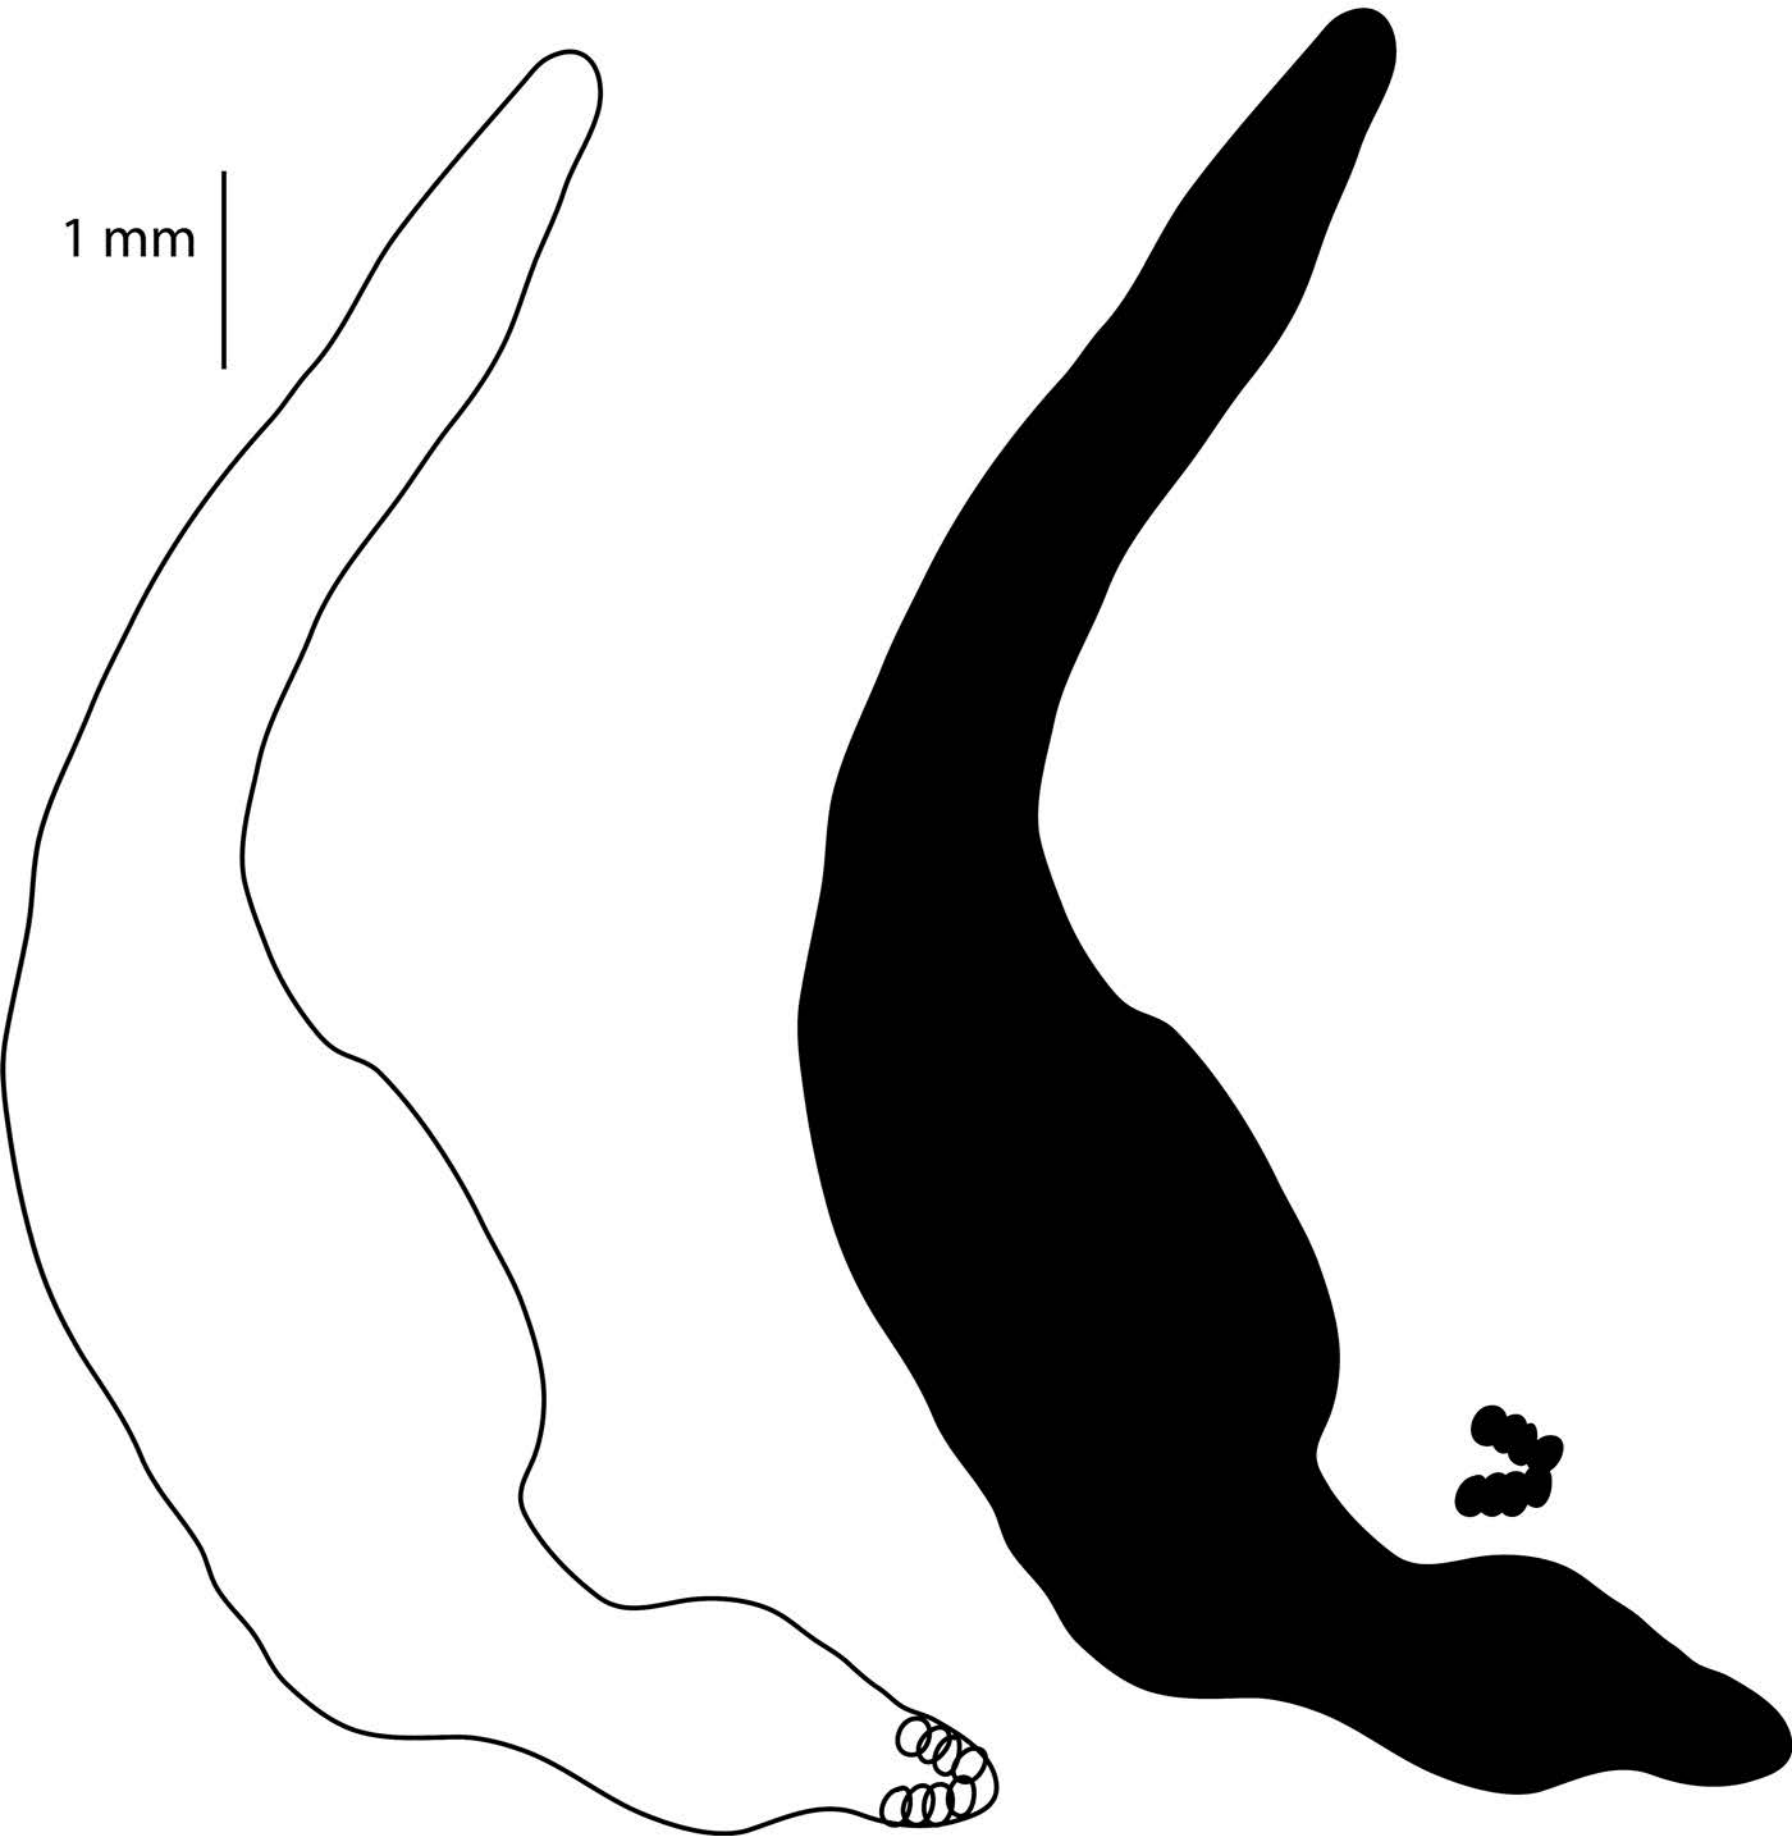

Family: Allodiscocotylidae

Species: *Metacamopia indica* (Unnithan, 1962) Lebedev, 1972

Body Surface: 1488158 ; Clamp Surface: 13866

Ratio: 0,93

Reference: Lebedev, 1986 , p154

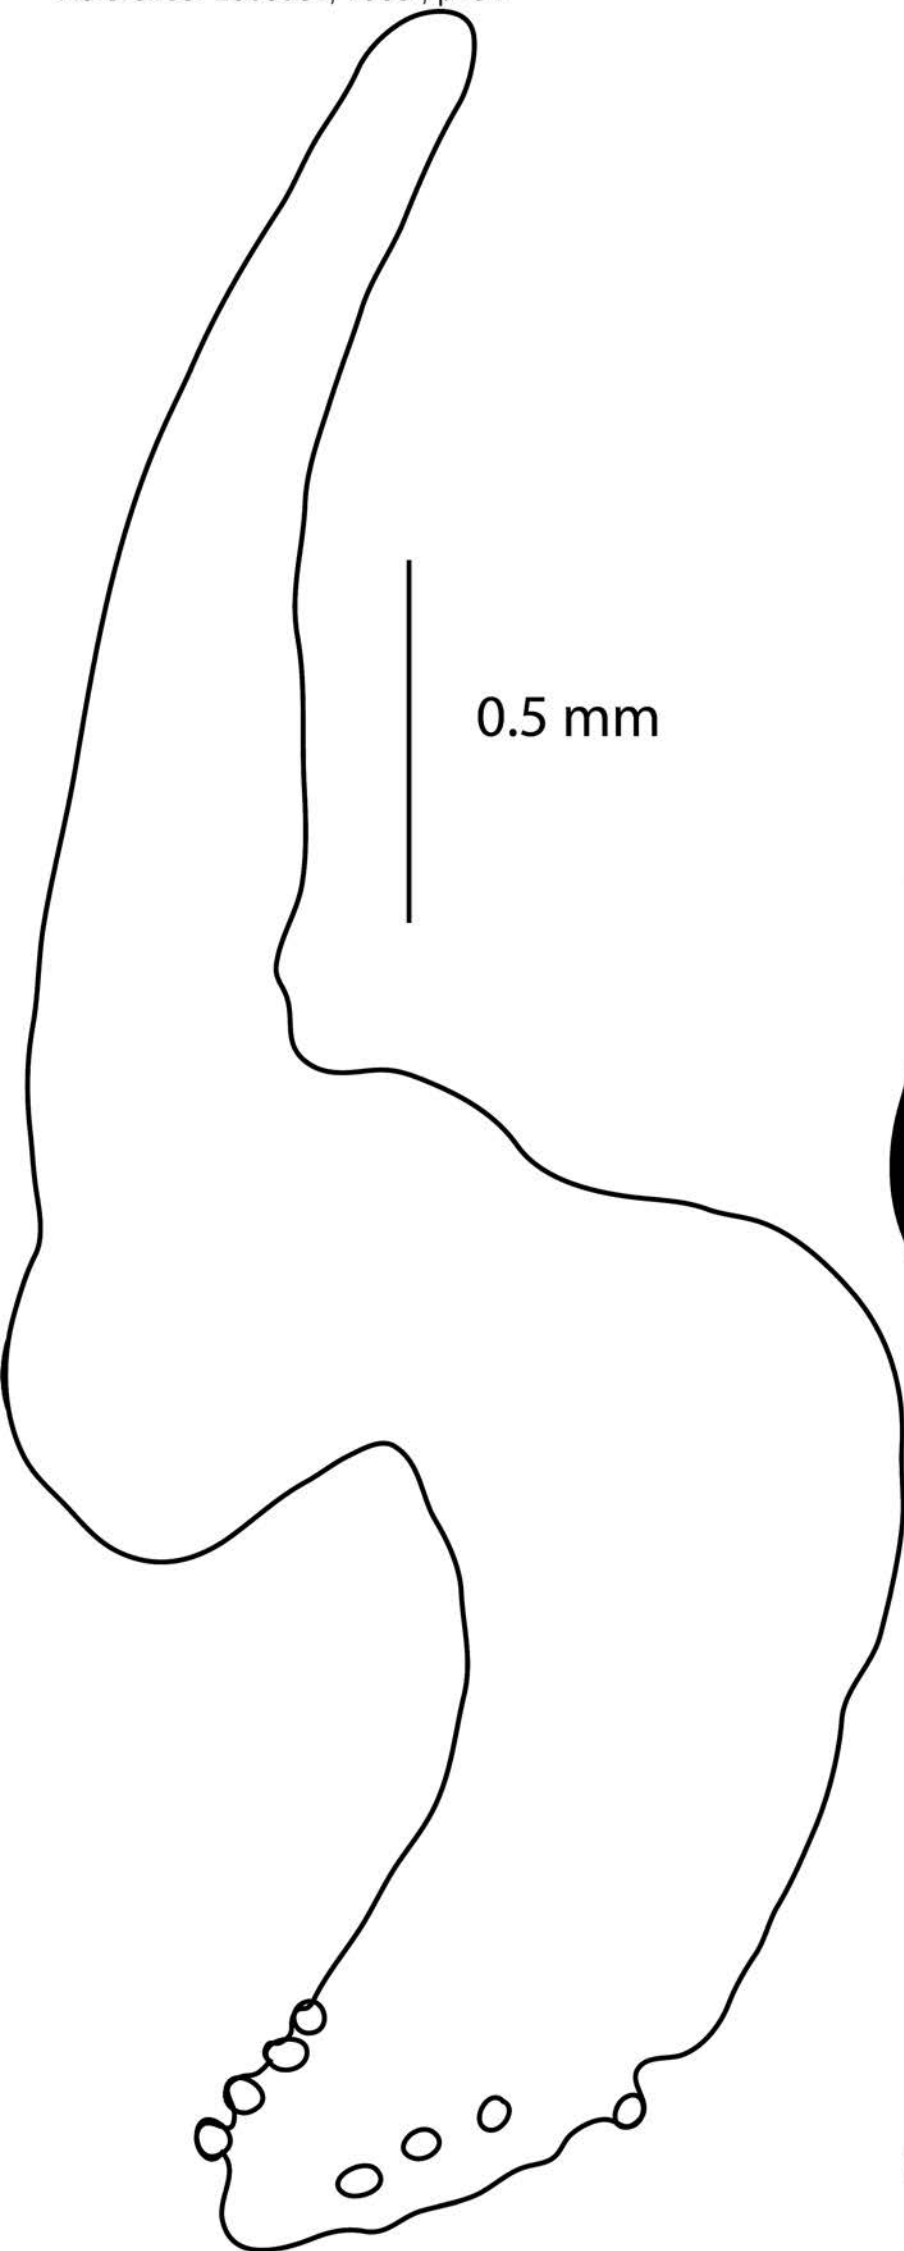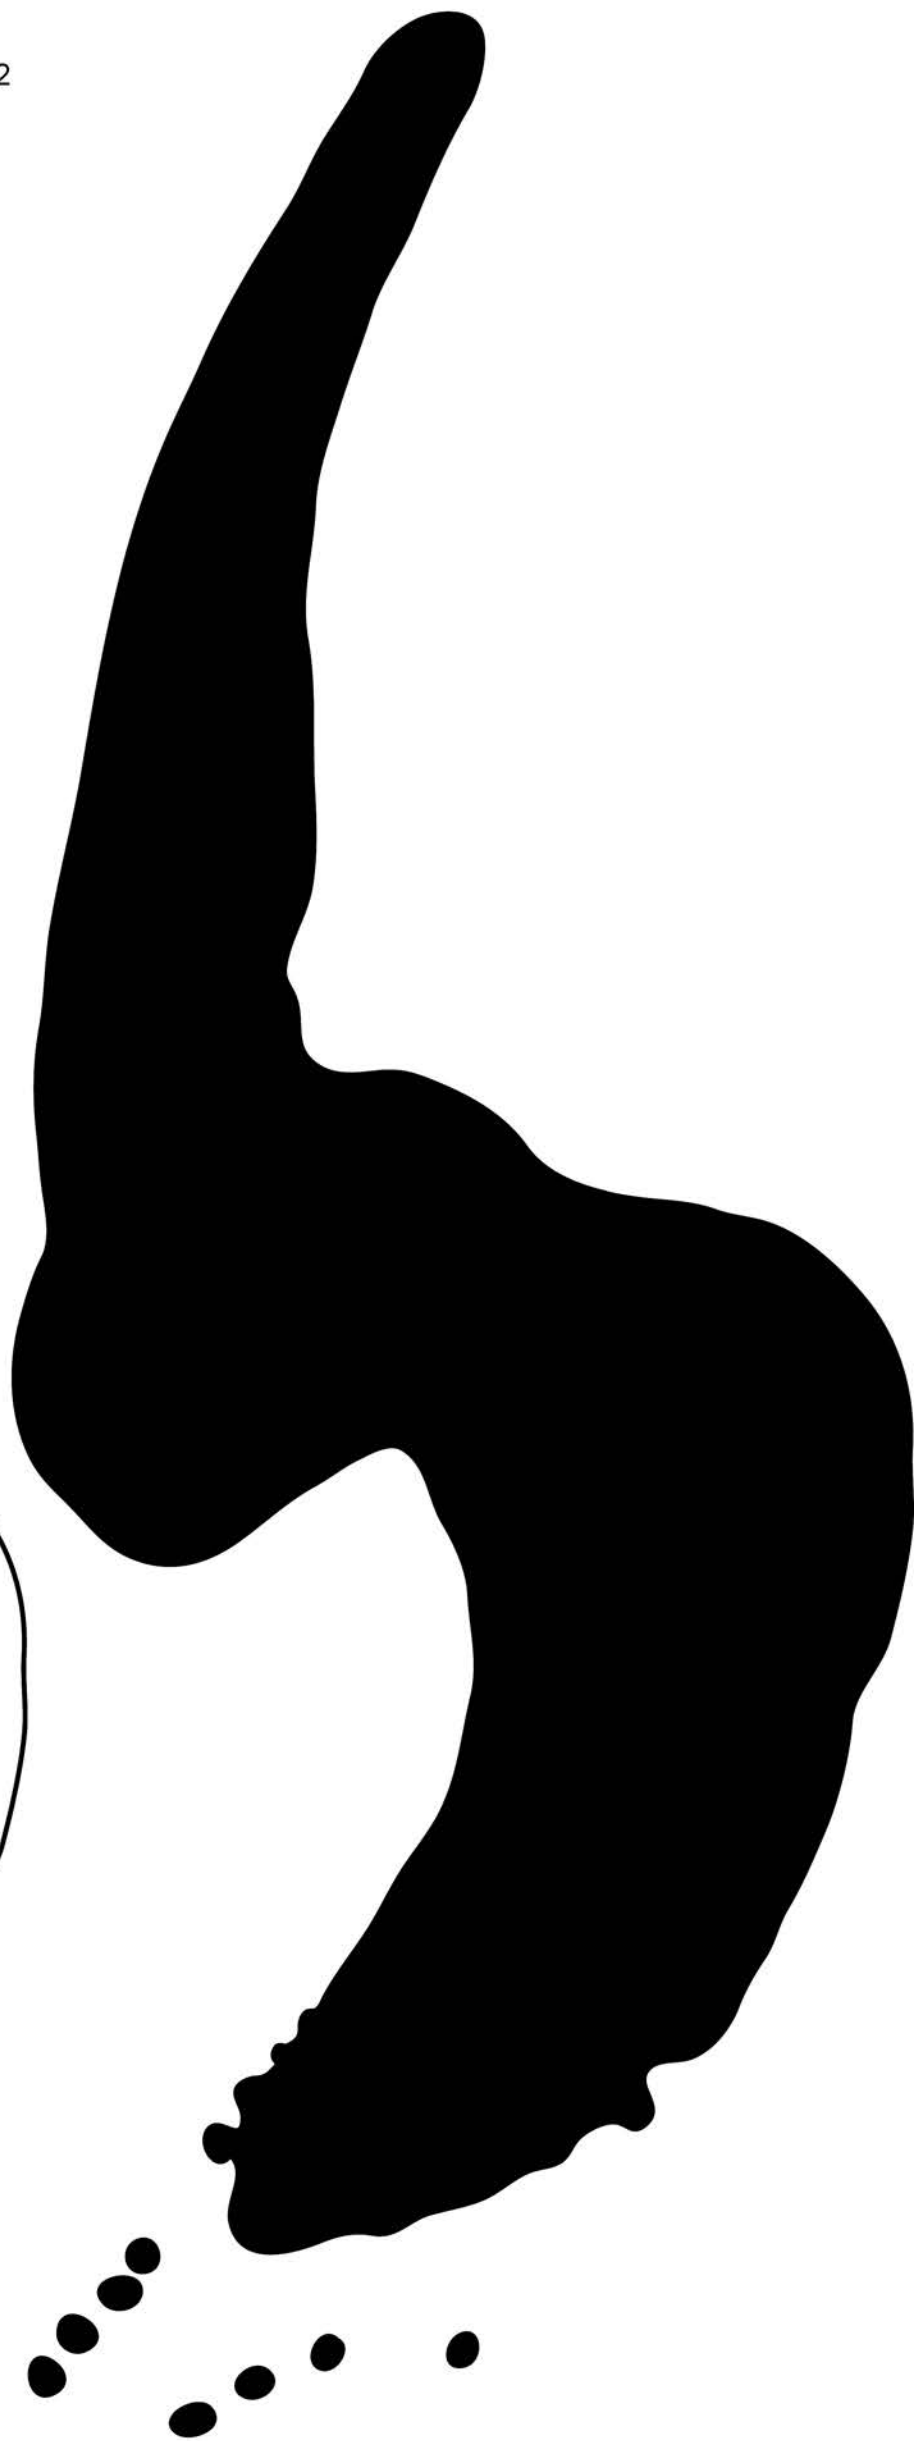

Family: Allodiscocotyloidae

Species: *Metacamopia oligoplites* Takemoto, Amato & Luque, 1996

Body Surface: 3,273,506

Clamp Surface: 62,243

Ratio: 1.90

Reference: Takemoto, 1996, p. 167

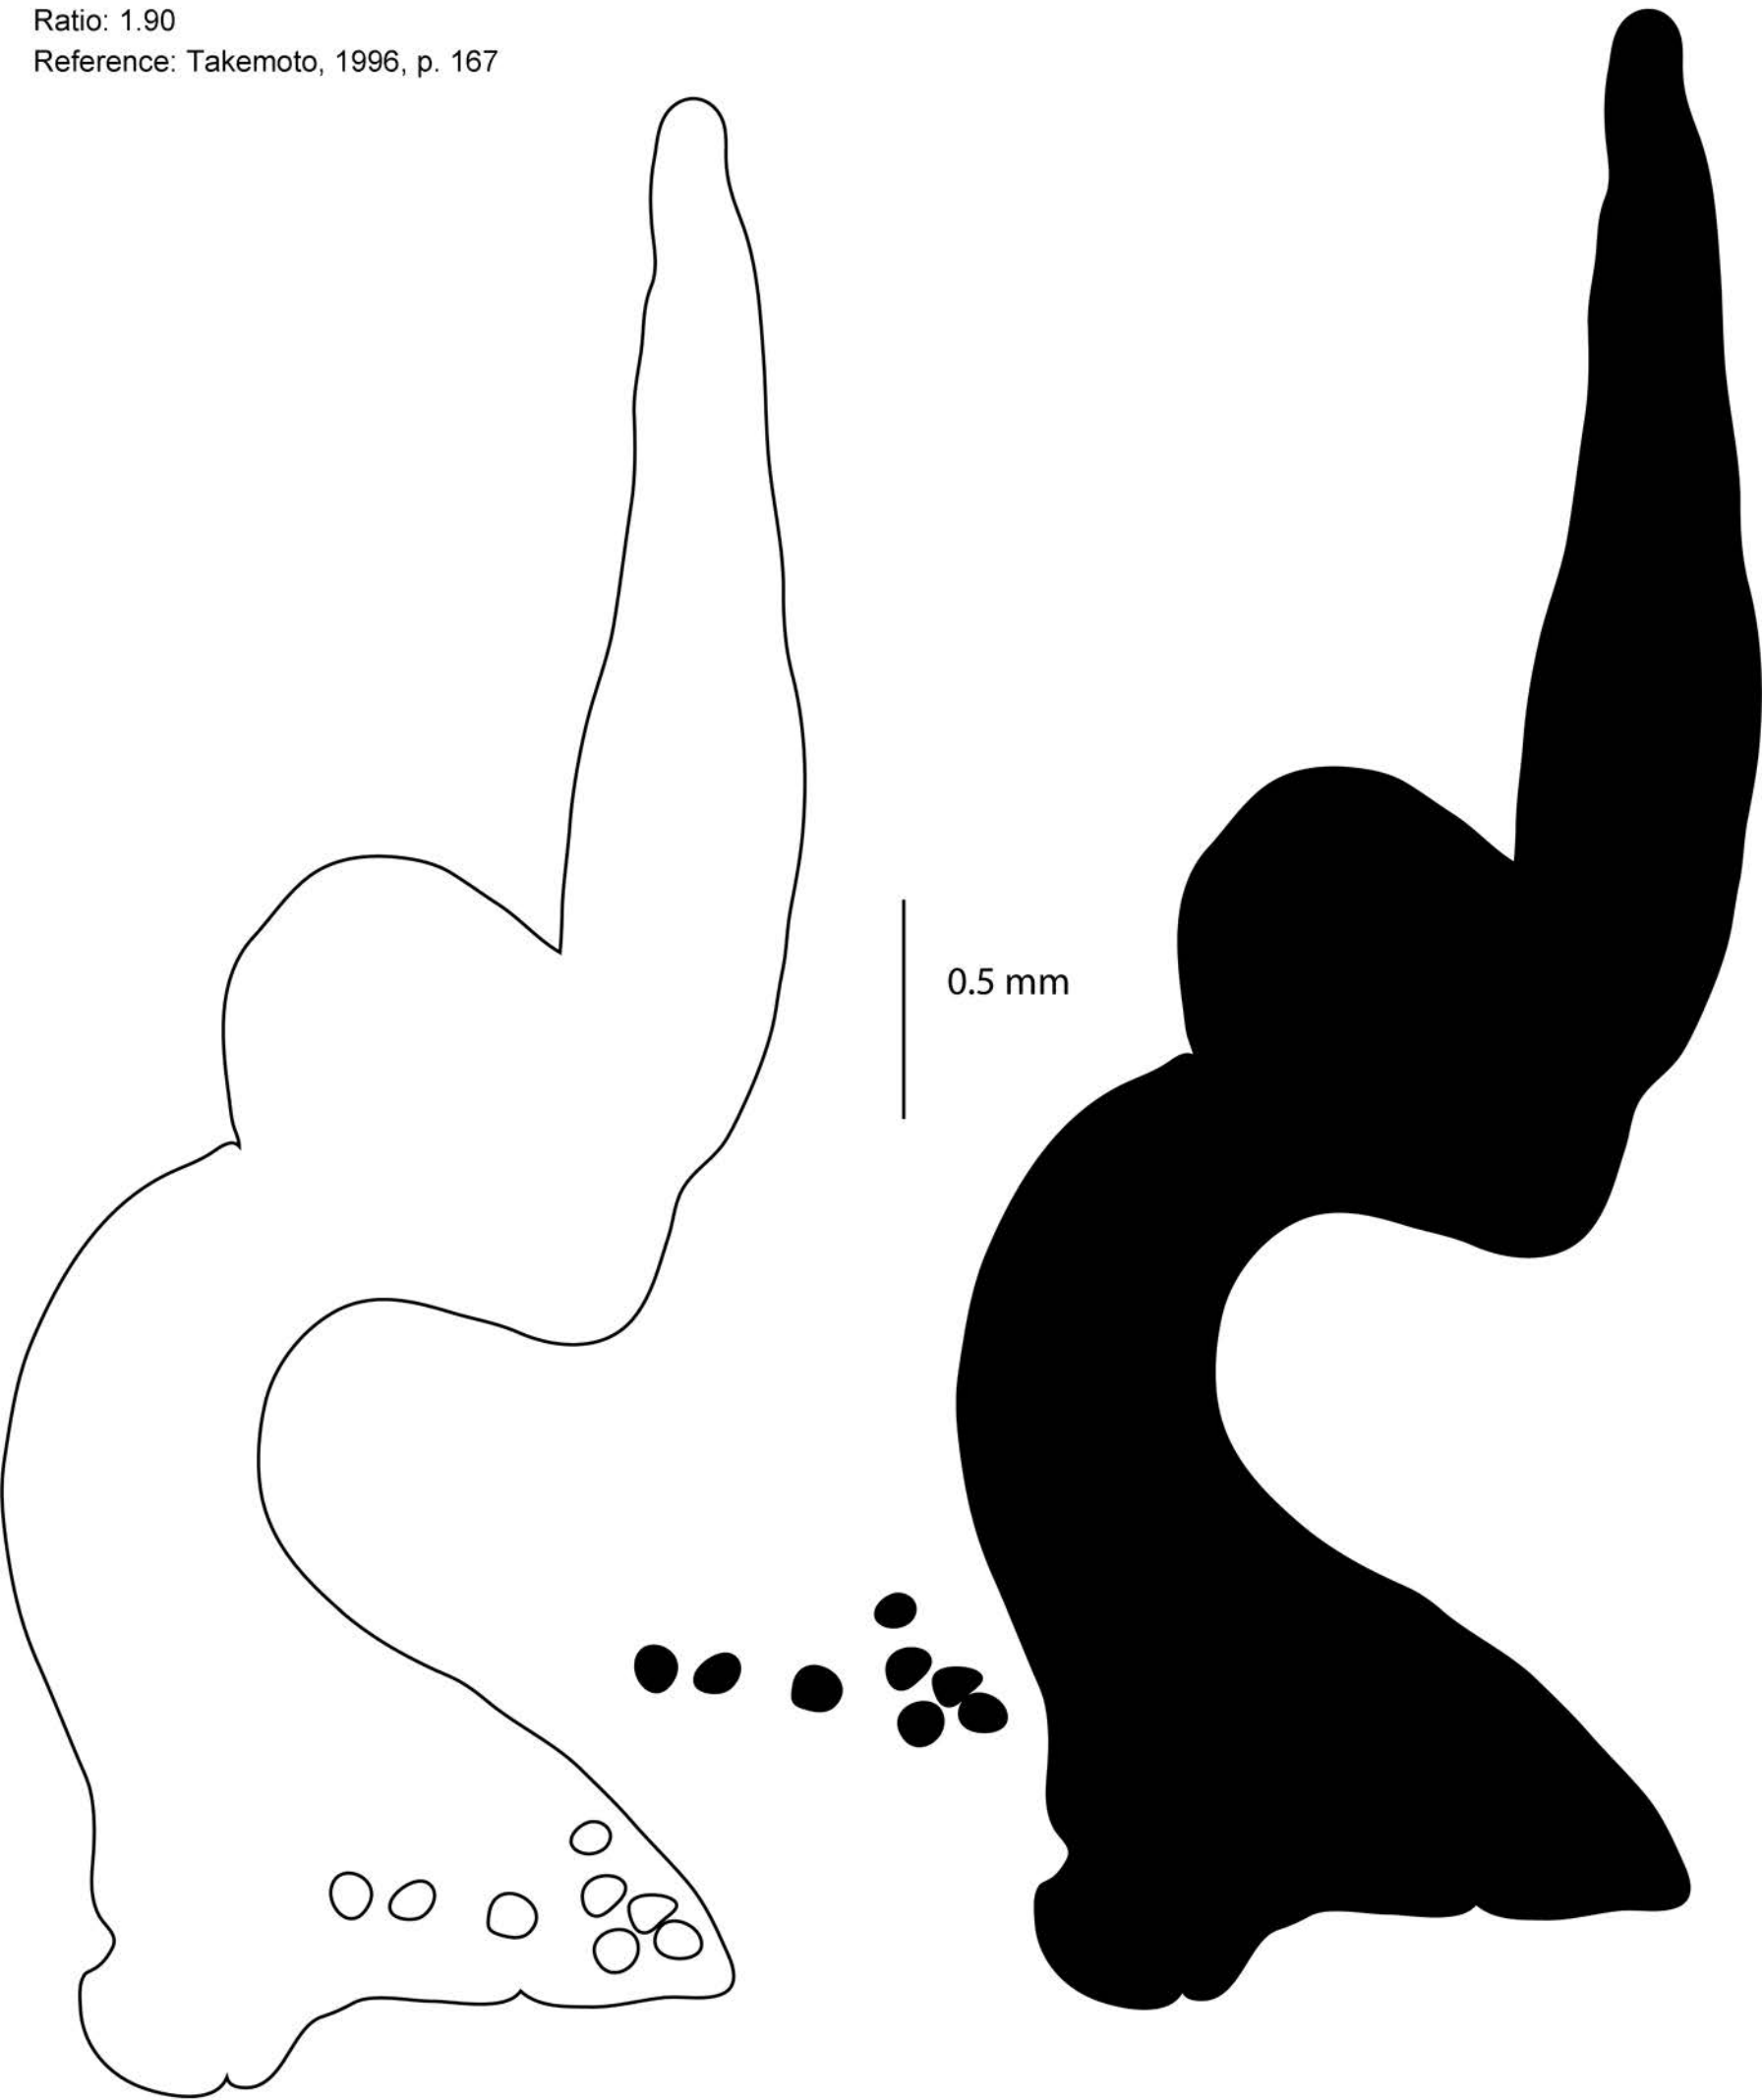

Family: Allodiscocotyloidae

Species: *Vallisia chorinemi* Yamaguti, 1953

Body Surface: 1,278,926

Clamps Surface: 16,737

Ratio: 1.31

Reference: Yamaguti, 1953, p. 65

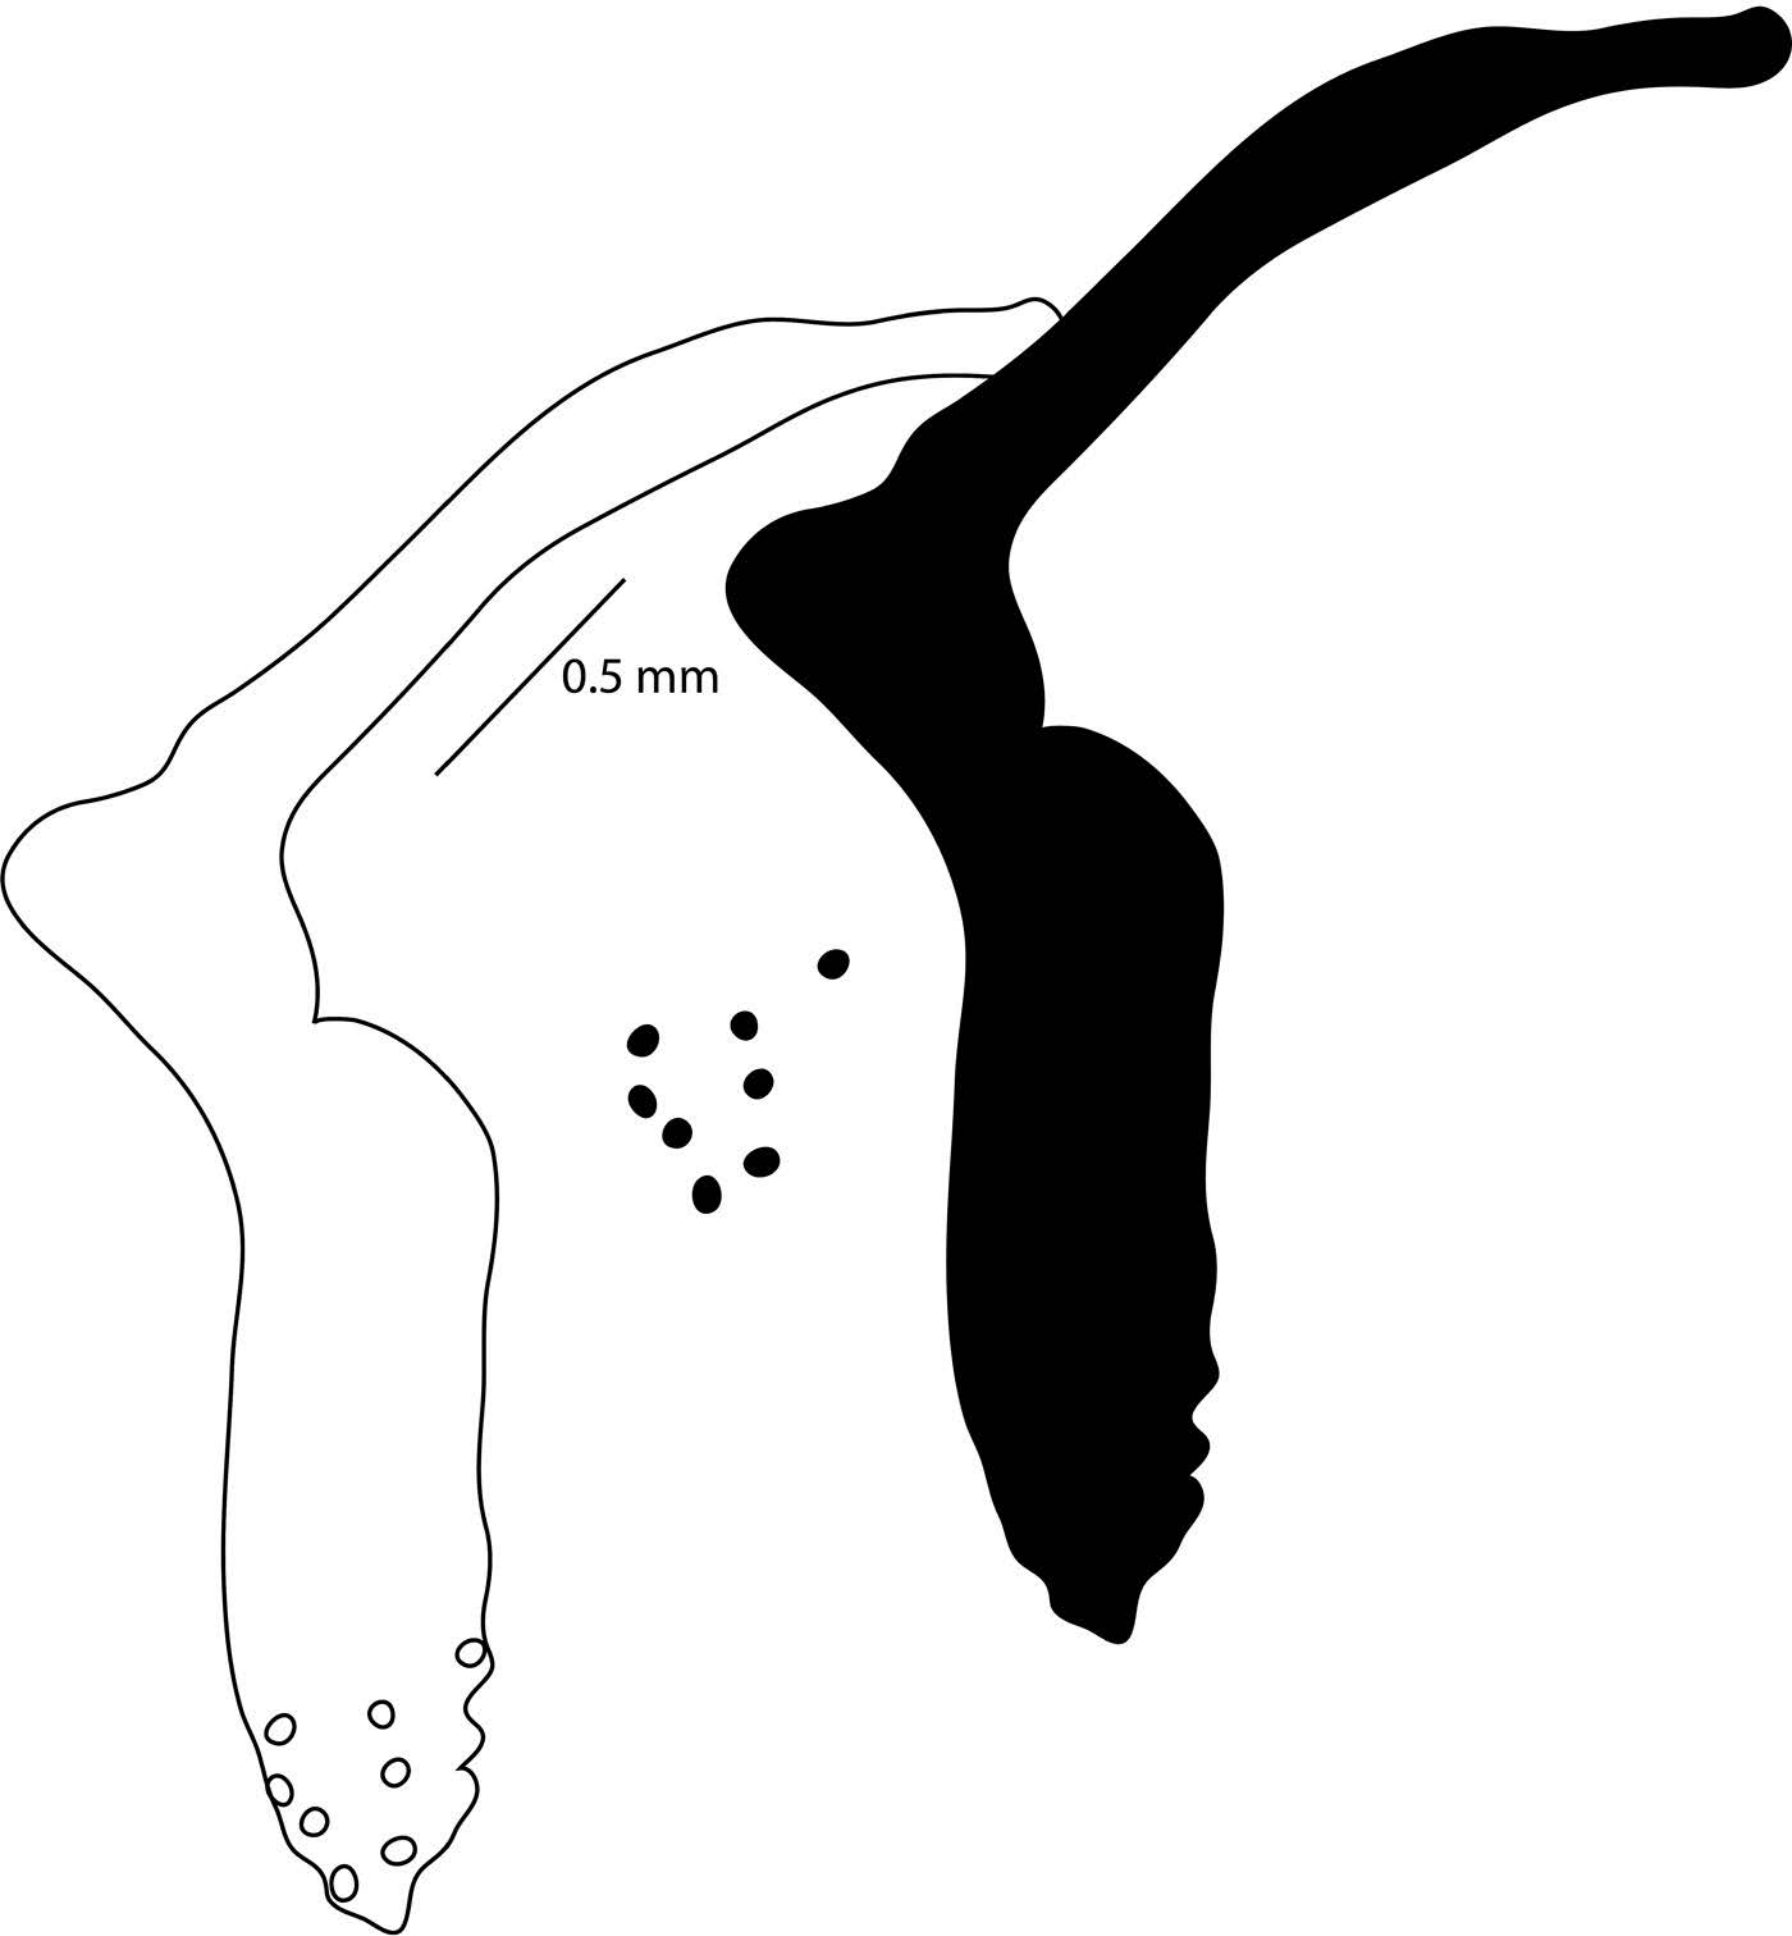



Family: Allodiscocotyloidae

Species: *Vallisia oligoplites* Hargis, 1957

Body Surface: 4,944,569

Clamp Surface: 248,805

Ratio: 5.03

reference: Hargis, 1957, p. 7

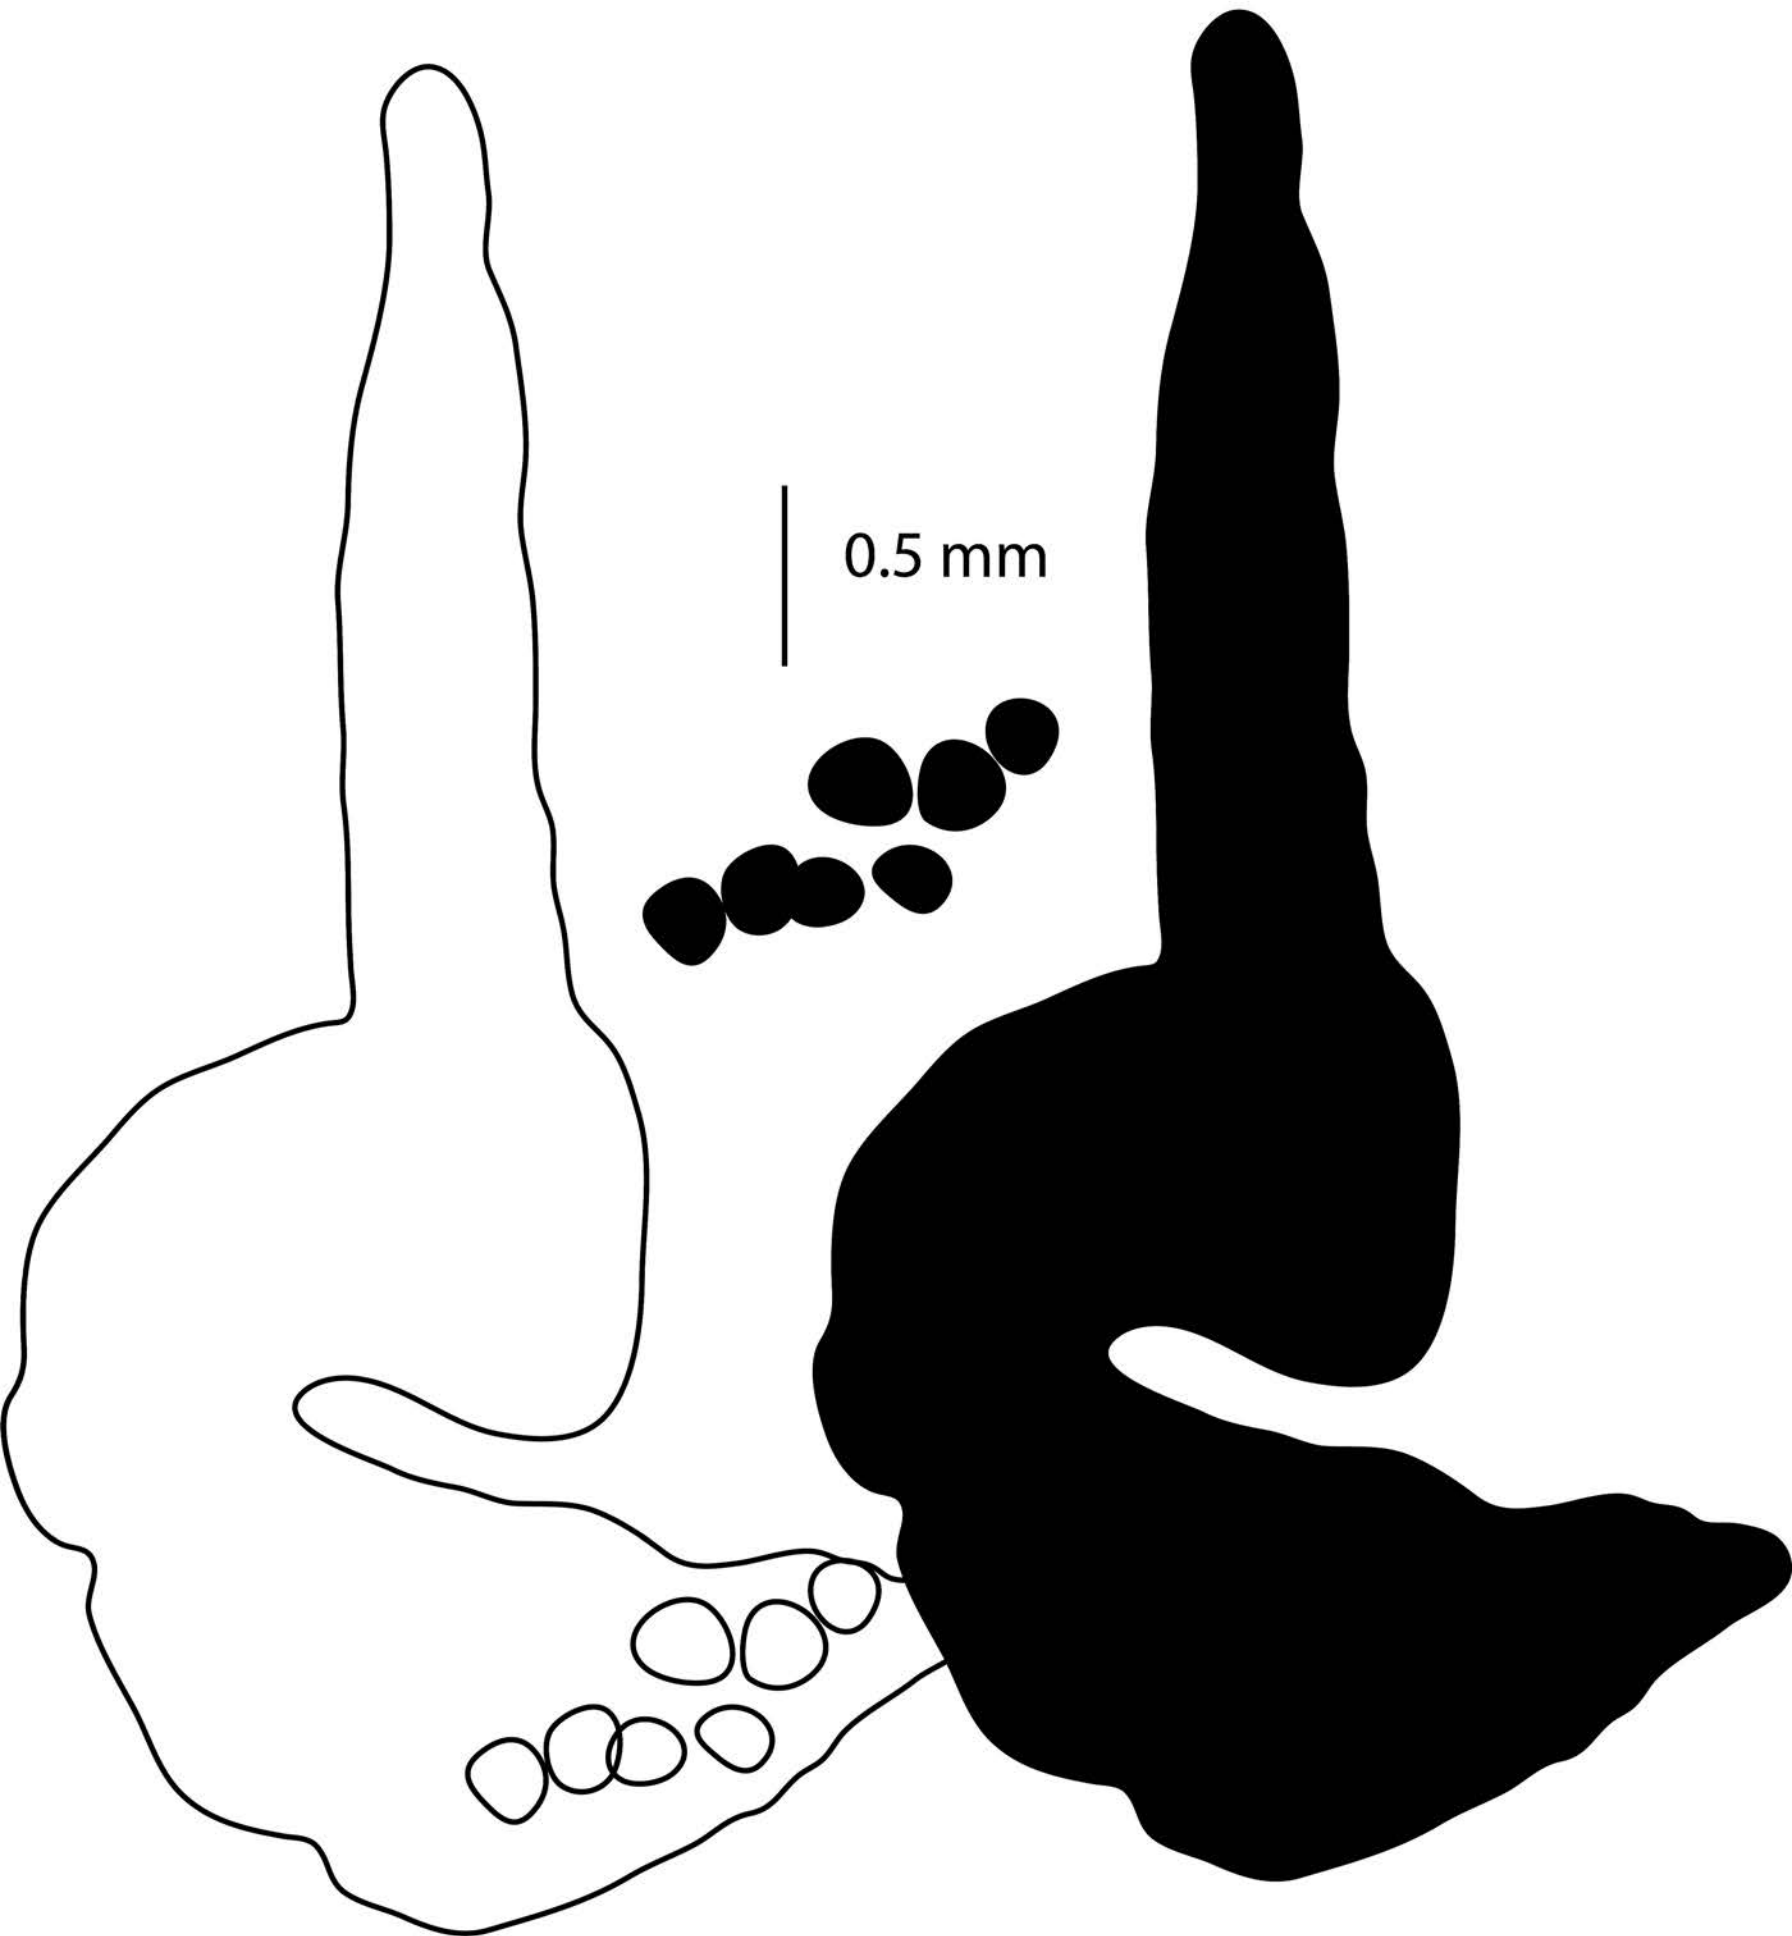

Family: Allodiscocotylidae  
Species: *Vallisia riojai* Caballero & Bravo-Hollis, 1963  
Body Surface: 971,416  
Clamps Surface: 10,768  
Ratio: 1.11  
Reference: Caballero & Caballero, 1963, p. 175

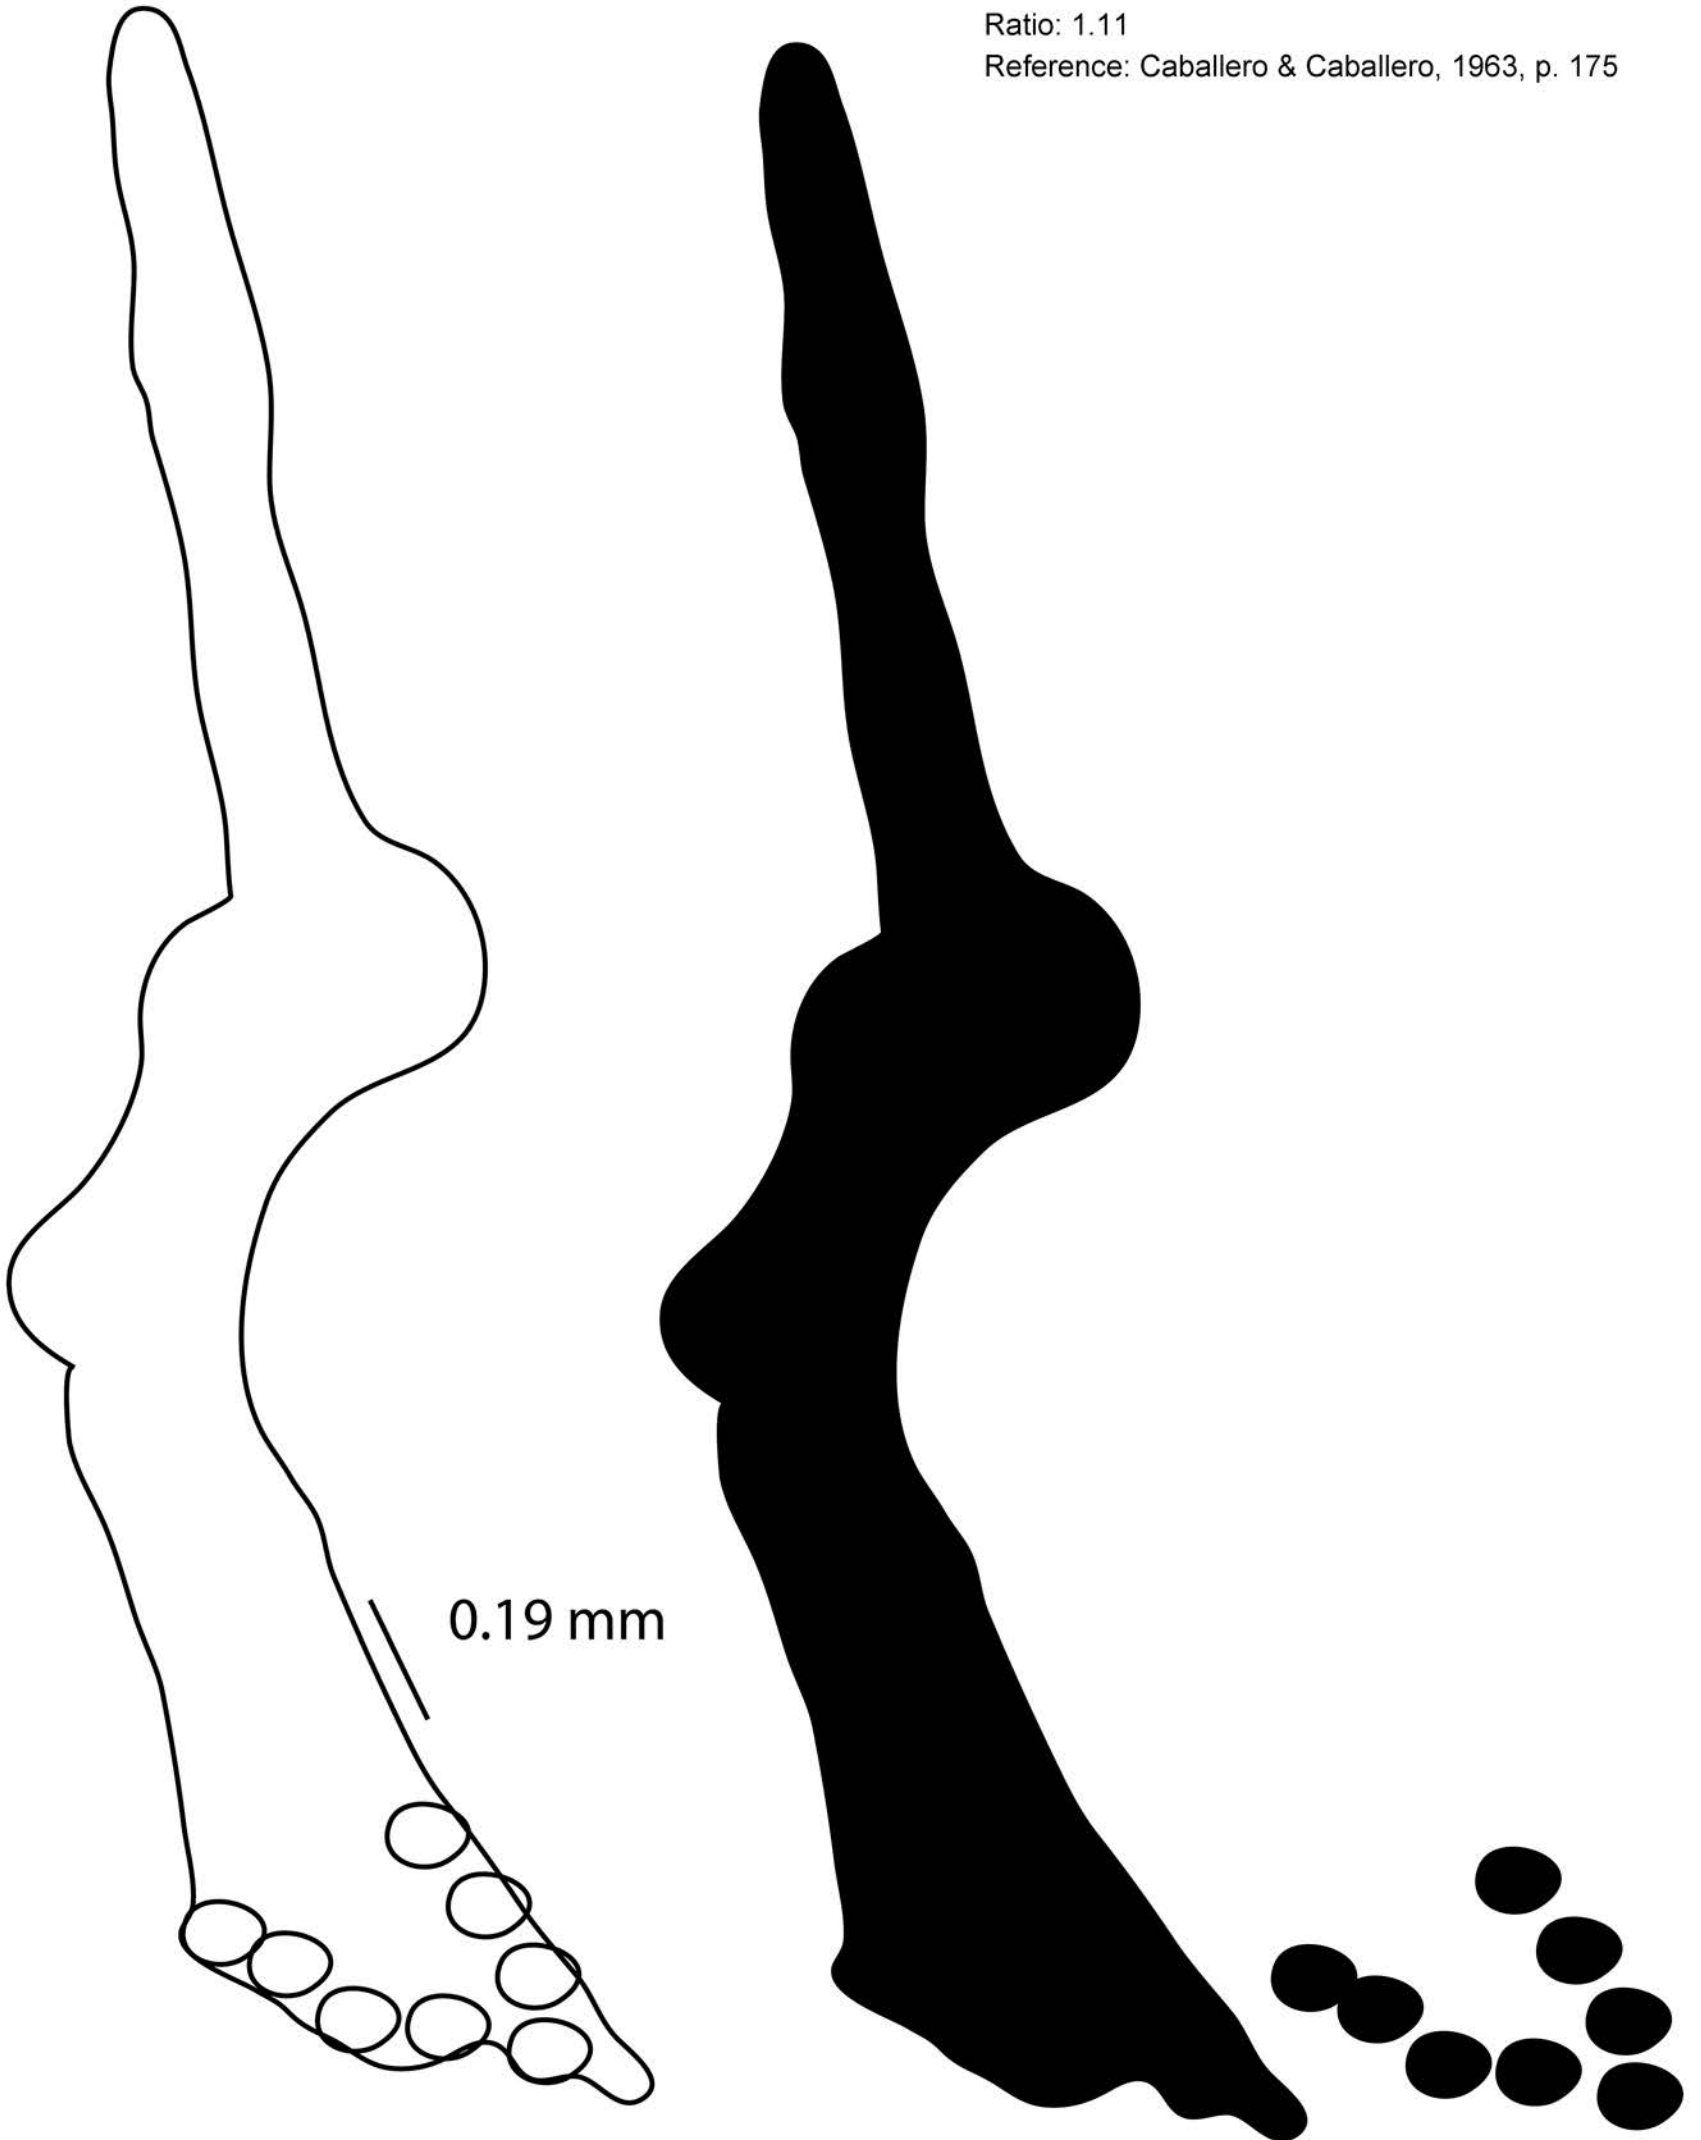

Family: Allodiscocotylidae

Species: *Vallisia striata* Parona & Perugia, 1890

Body Surface: 18,448,597

Clamp Surface: 373,475

Ratio: 2.02

Reference: Parona & Perugia, 1890, p. 19

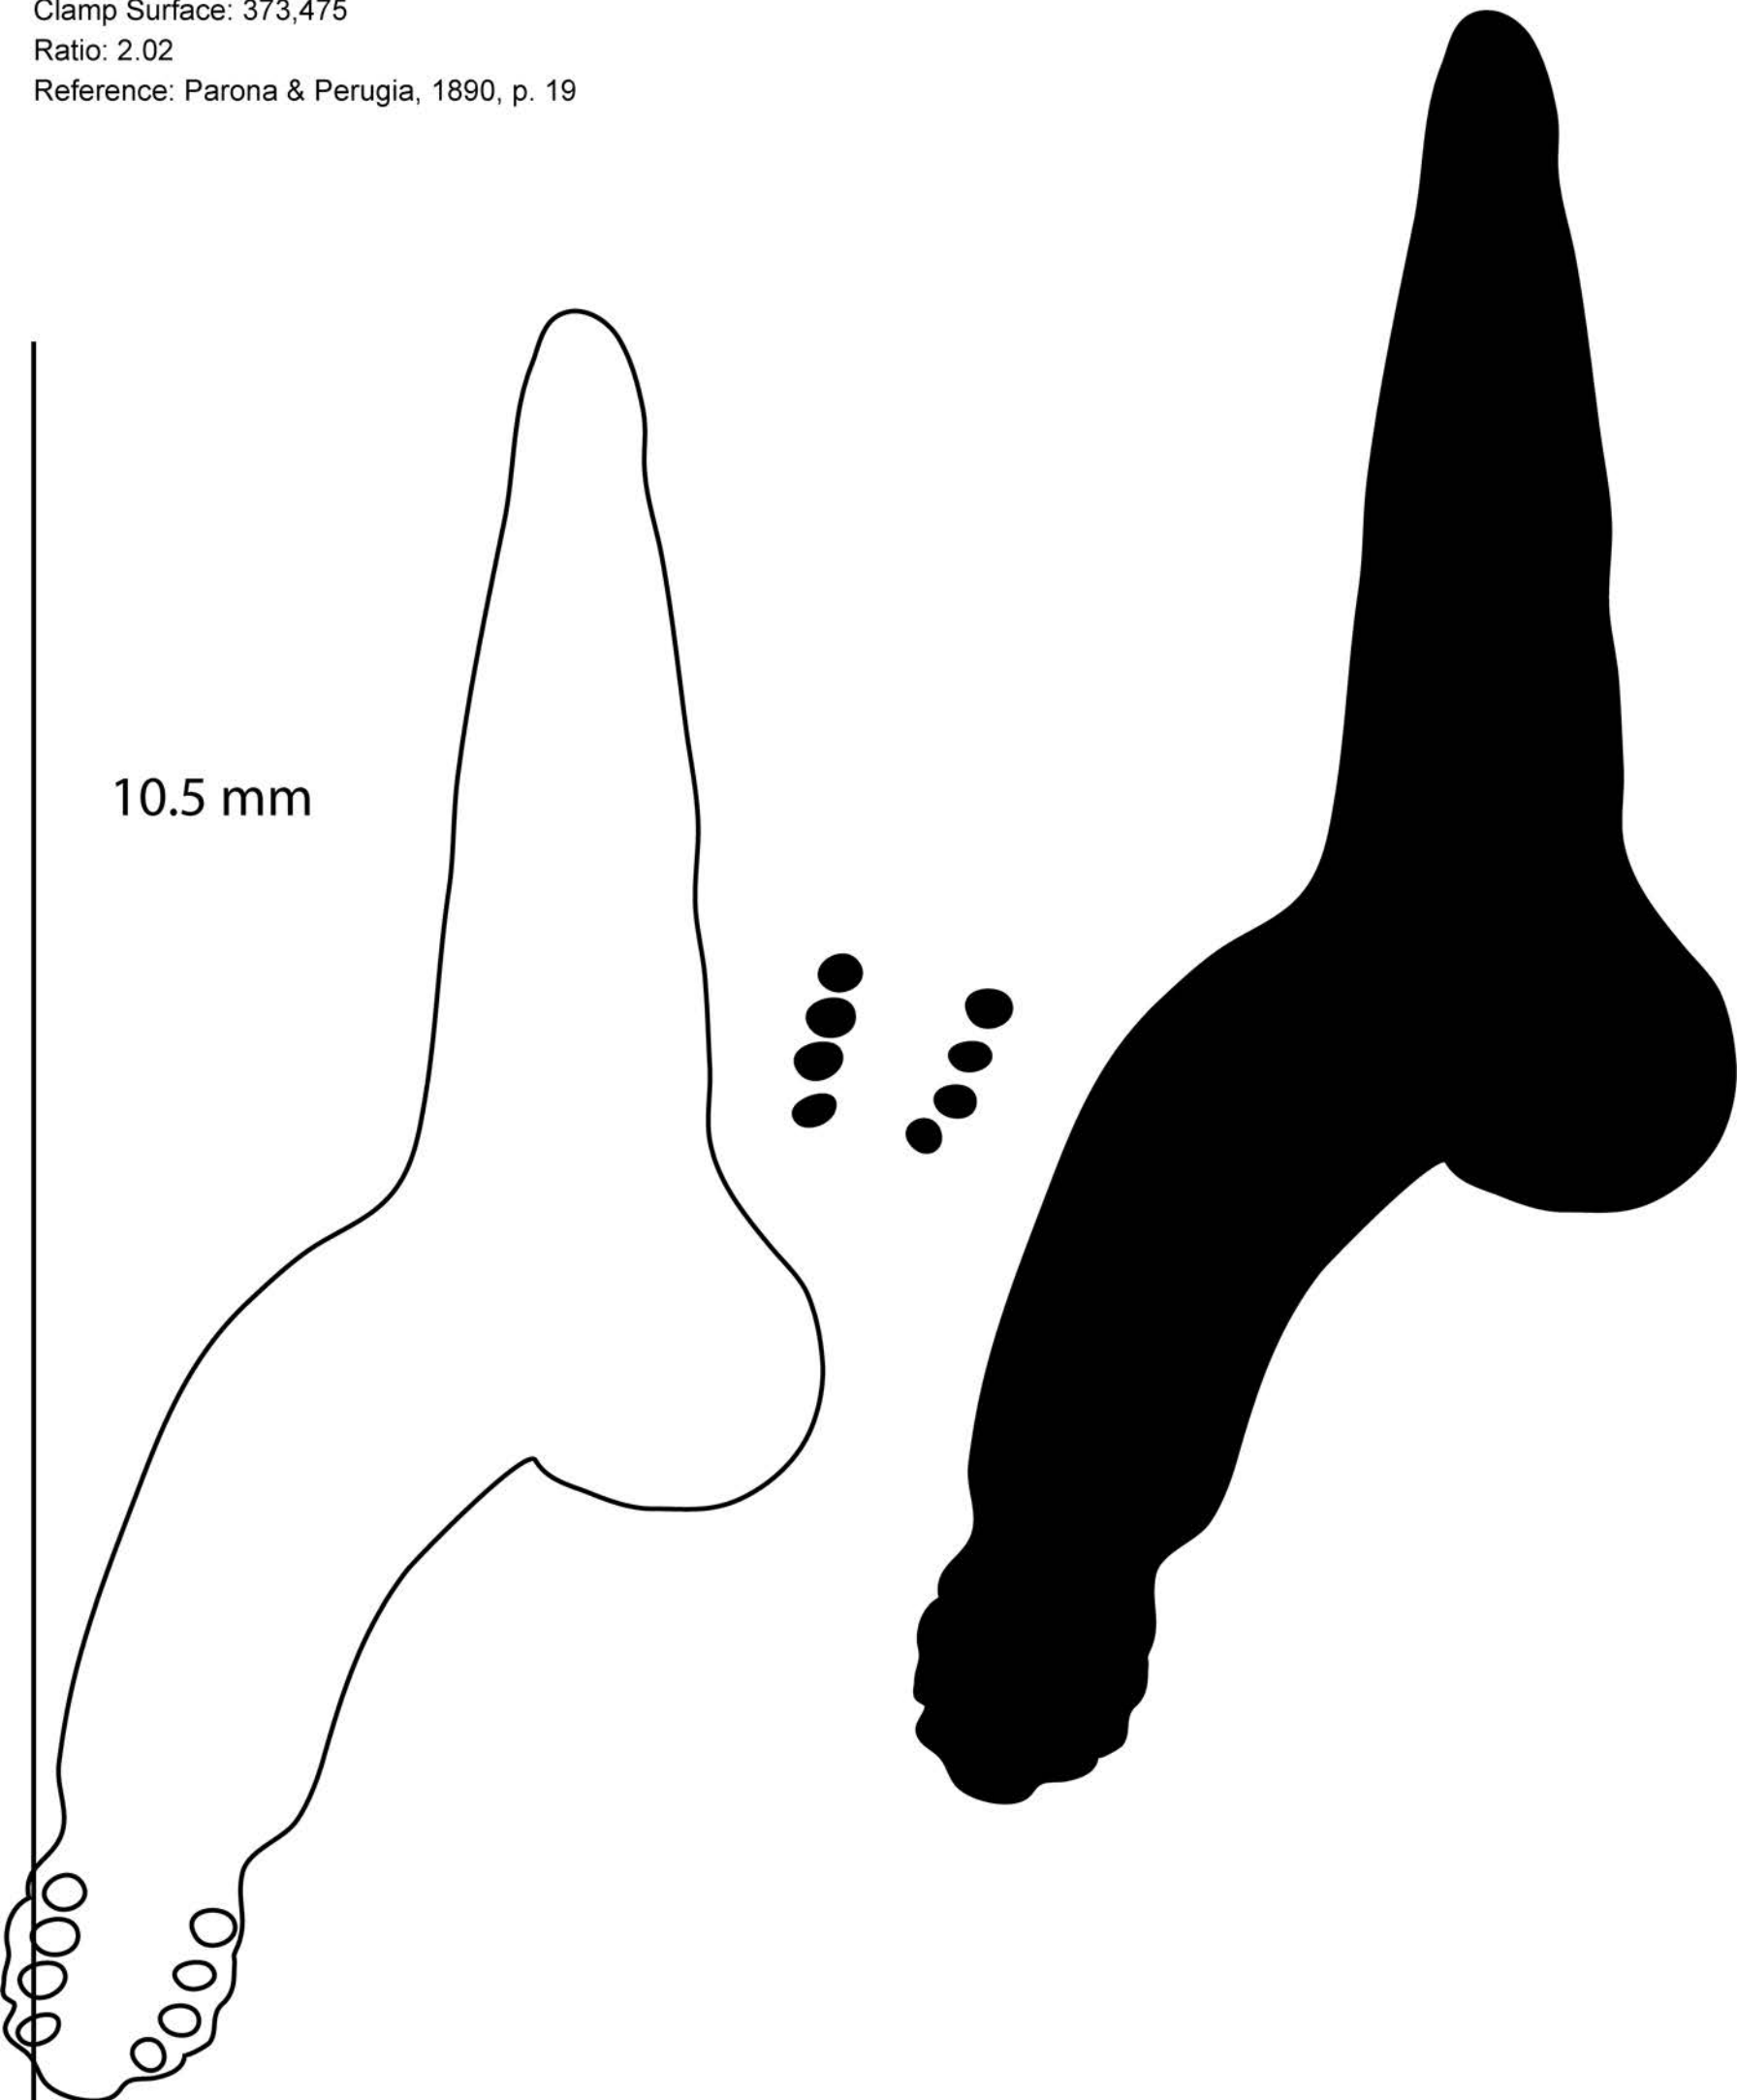

Family: Bychowskicotylidae

Species: *Bychowskicotyle plectorhynchi* Lebedev, 1969

Body Surface: 857,260

clamp Surface: 65,536

Ratio: 7.64

Reference: Lebedev, 1986, p. 100

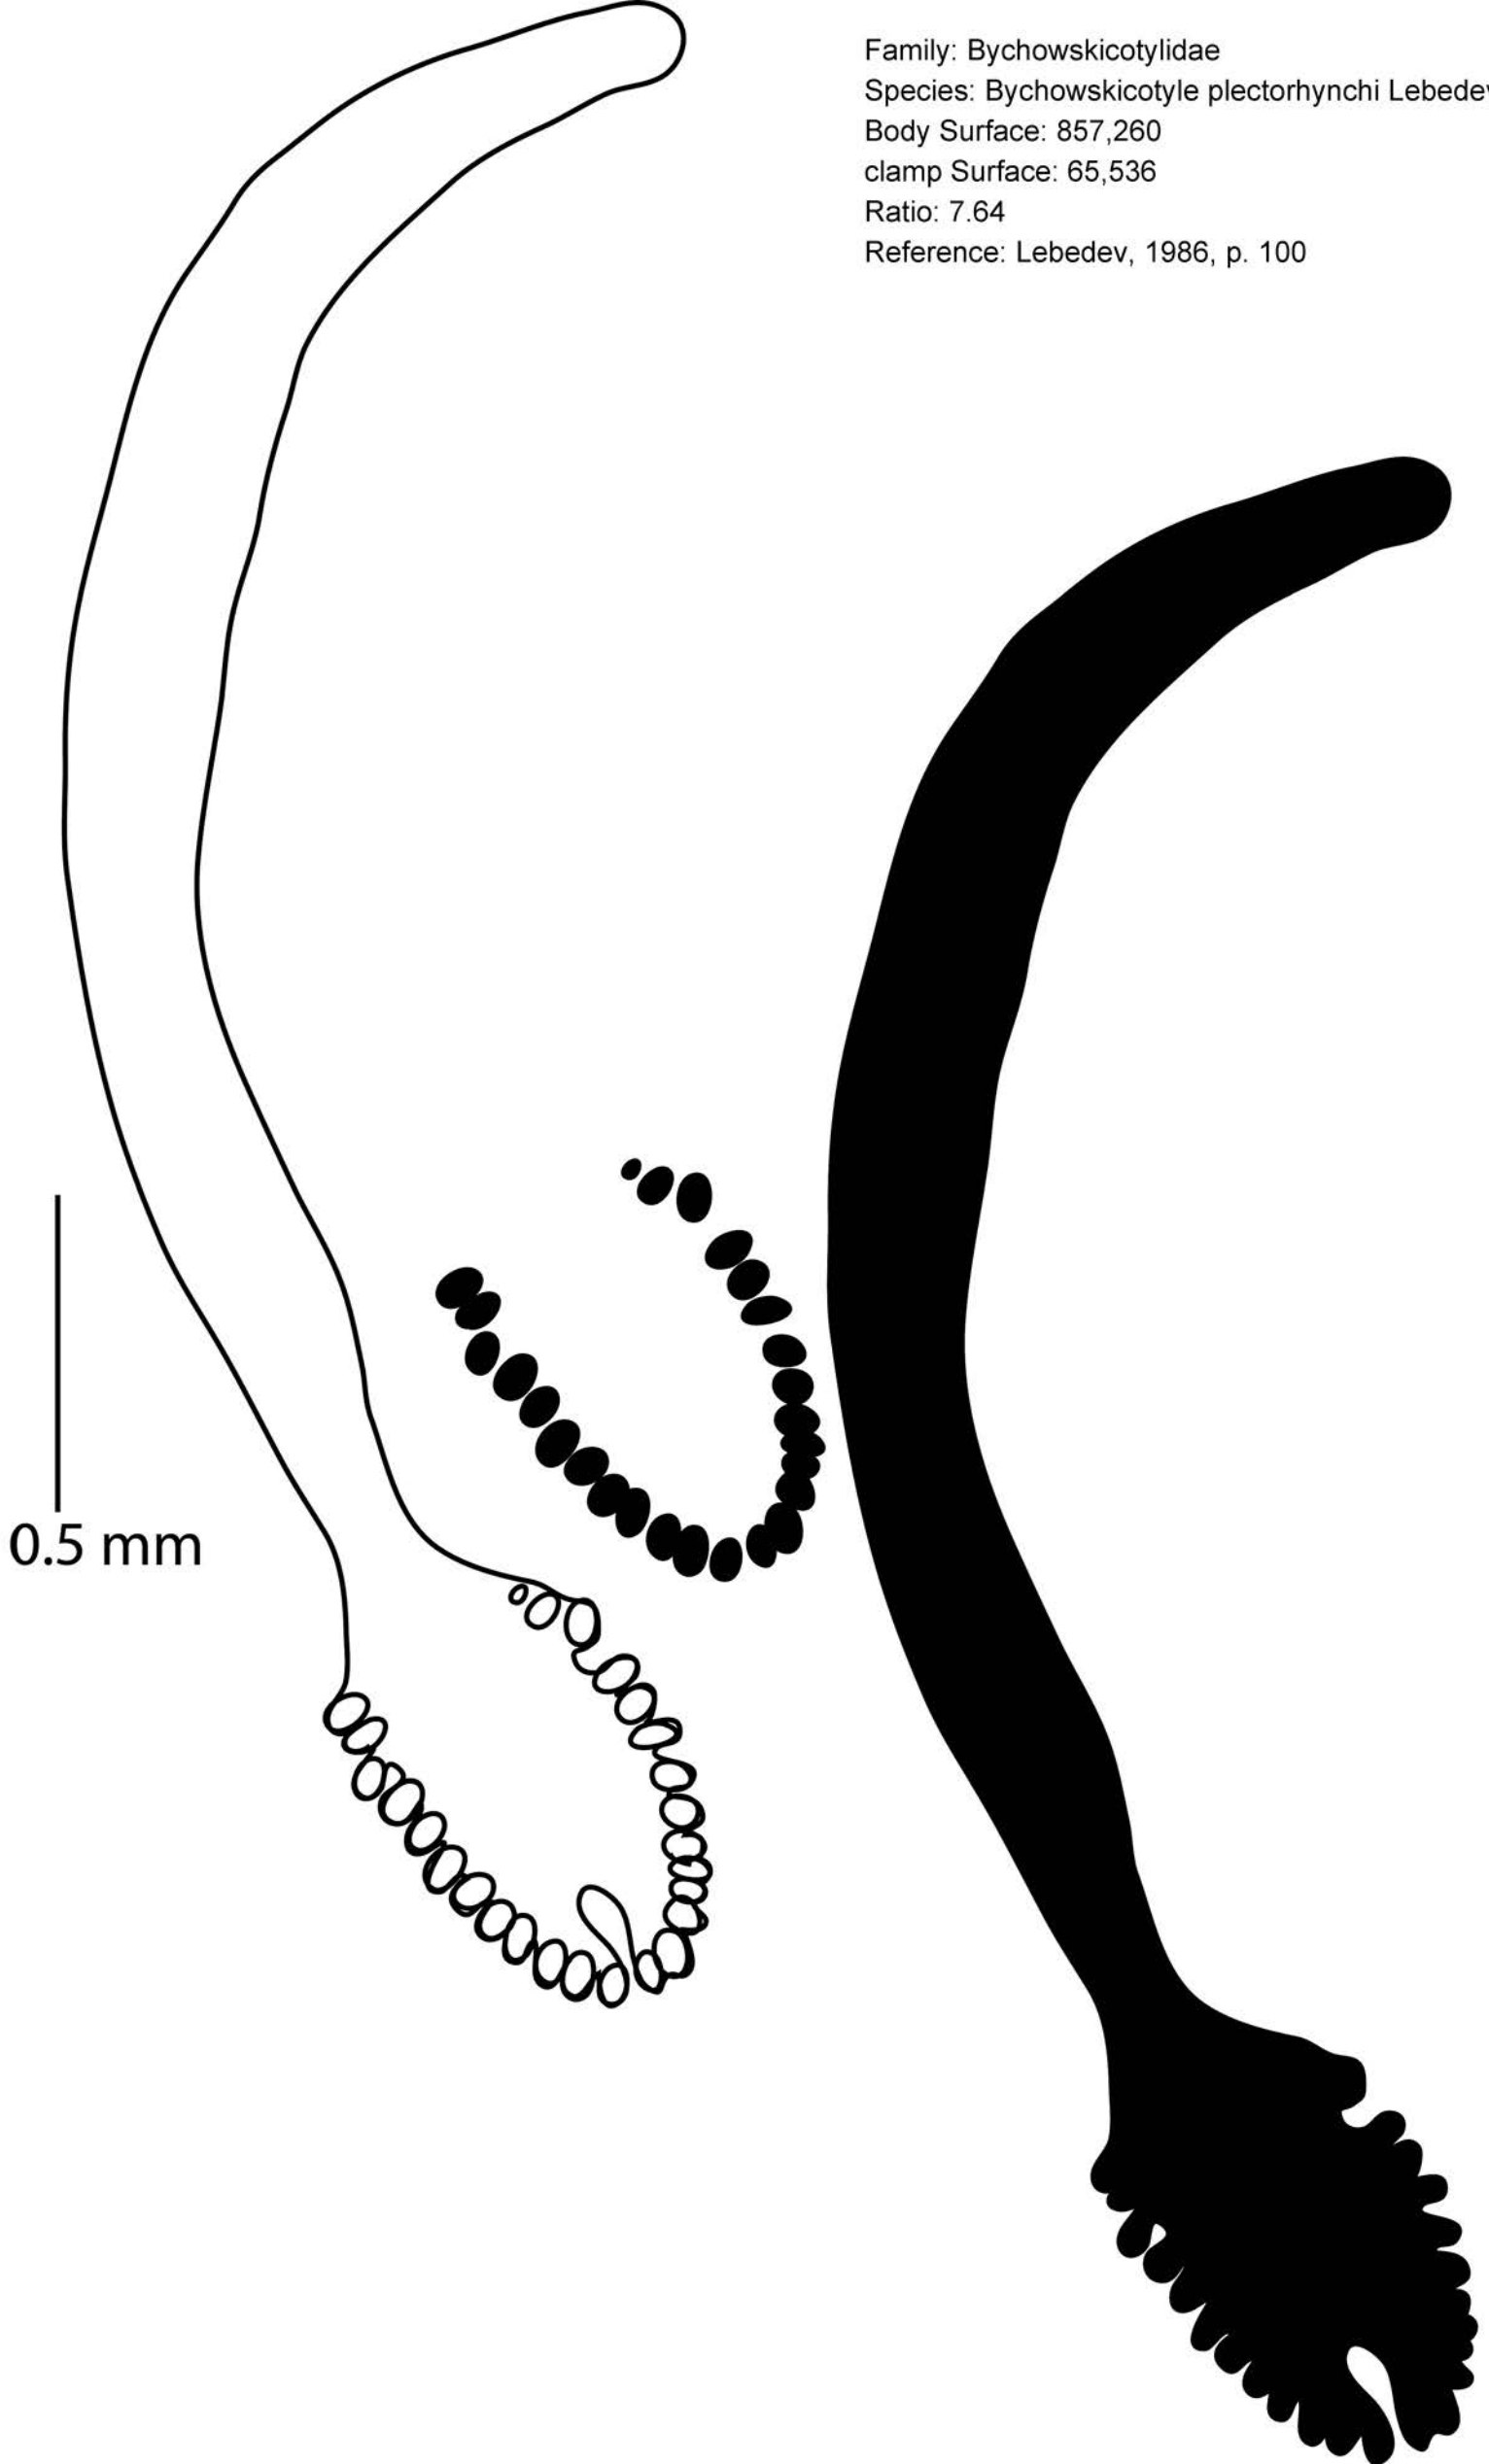

Family: Bychowskicotylidae  
Species: *Gaterina talaensis* Lebedev, 1969  
Body Surface: 619,337  
Clamp Surface: 33,586  
Ratio: 5.42  
Reference: Lebedev, 1986, p. 101

0.3 mm

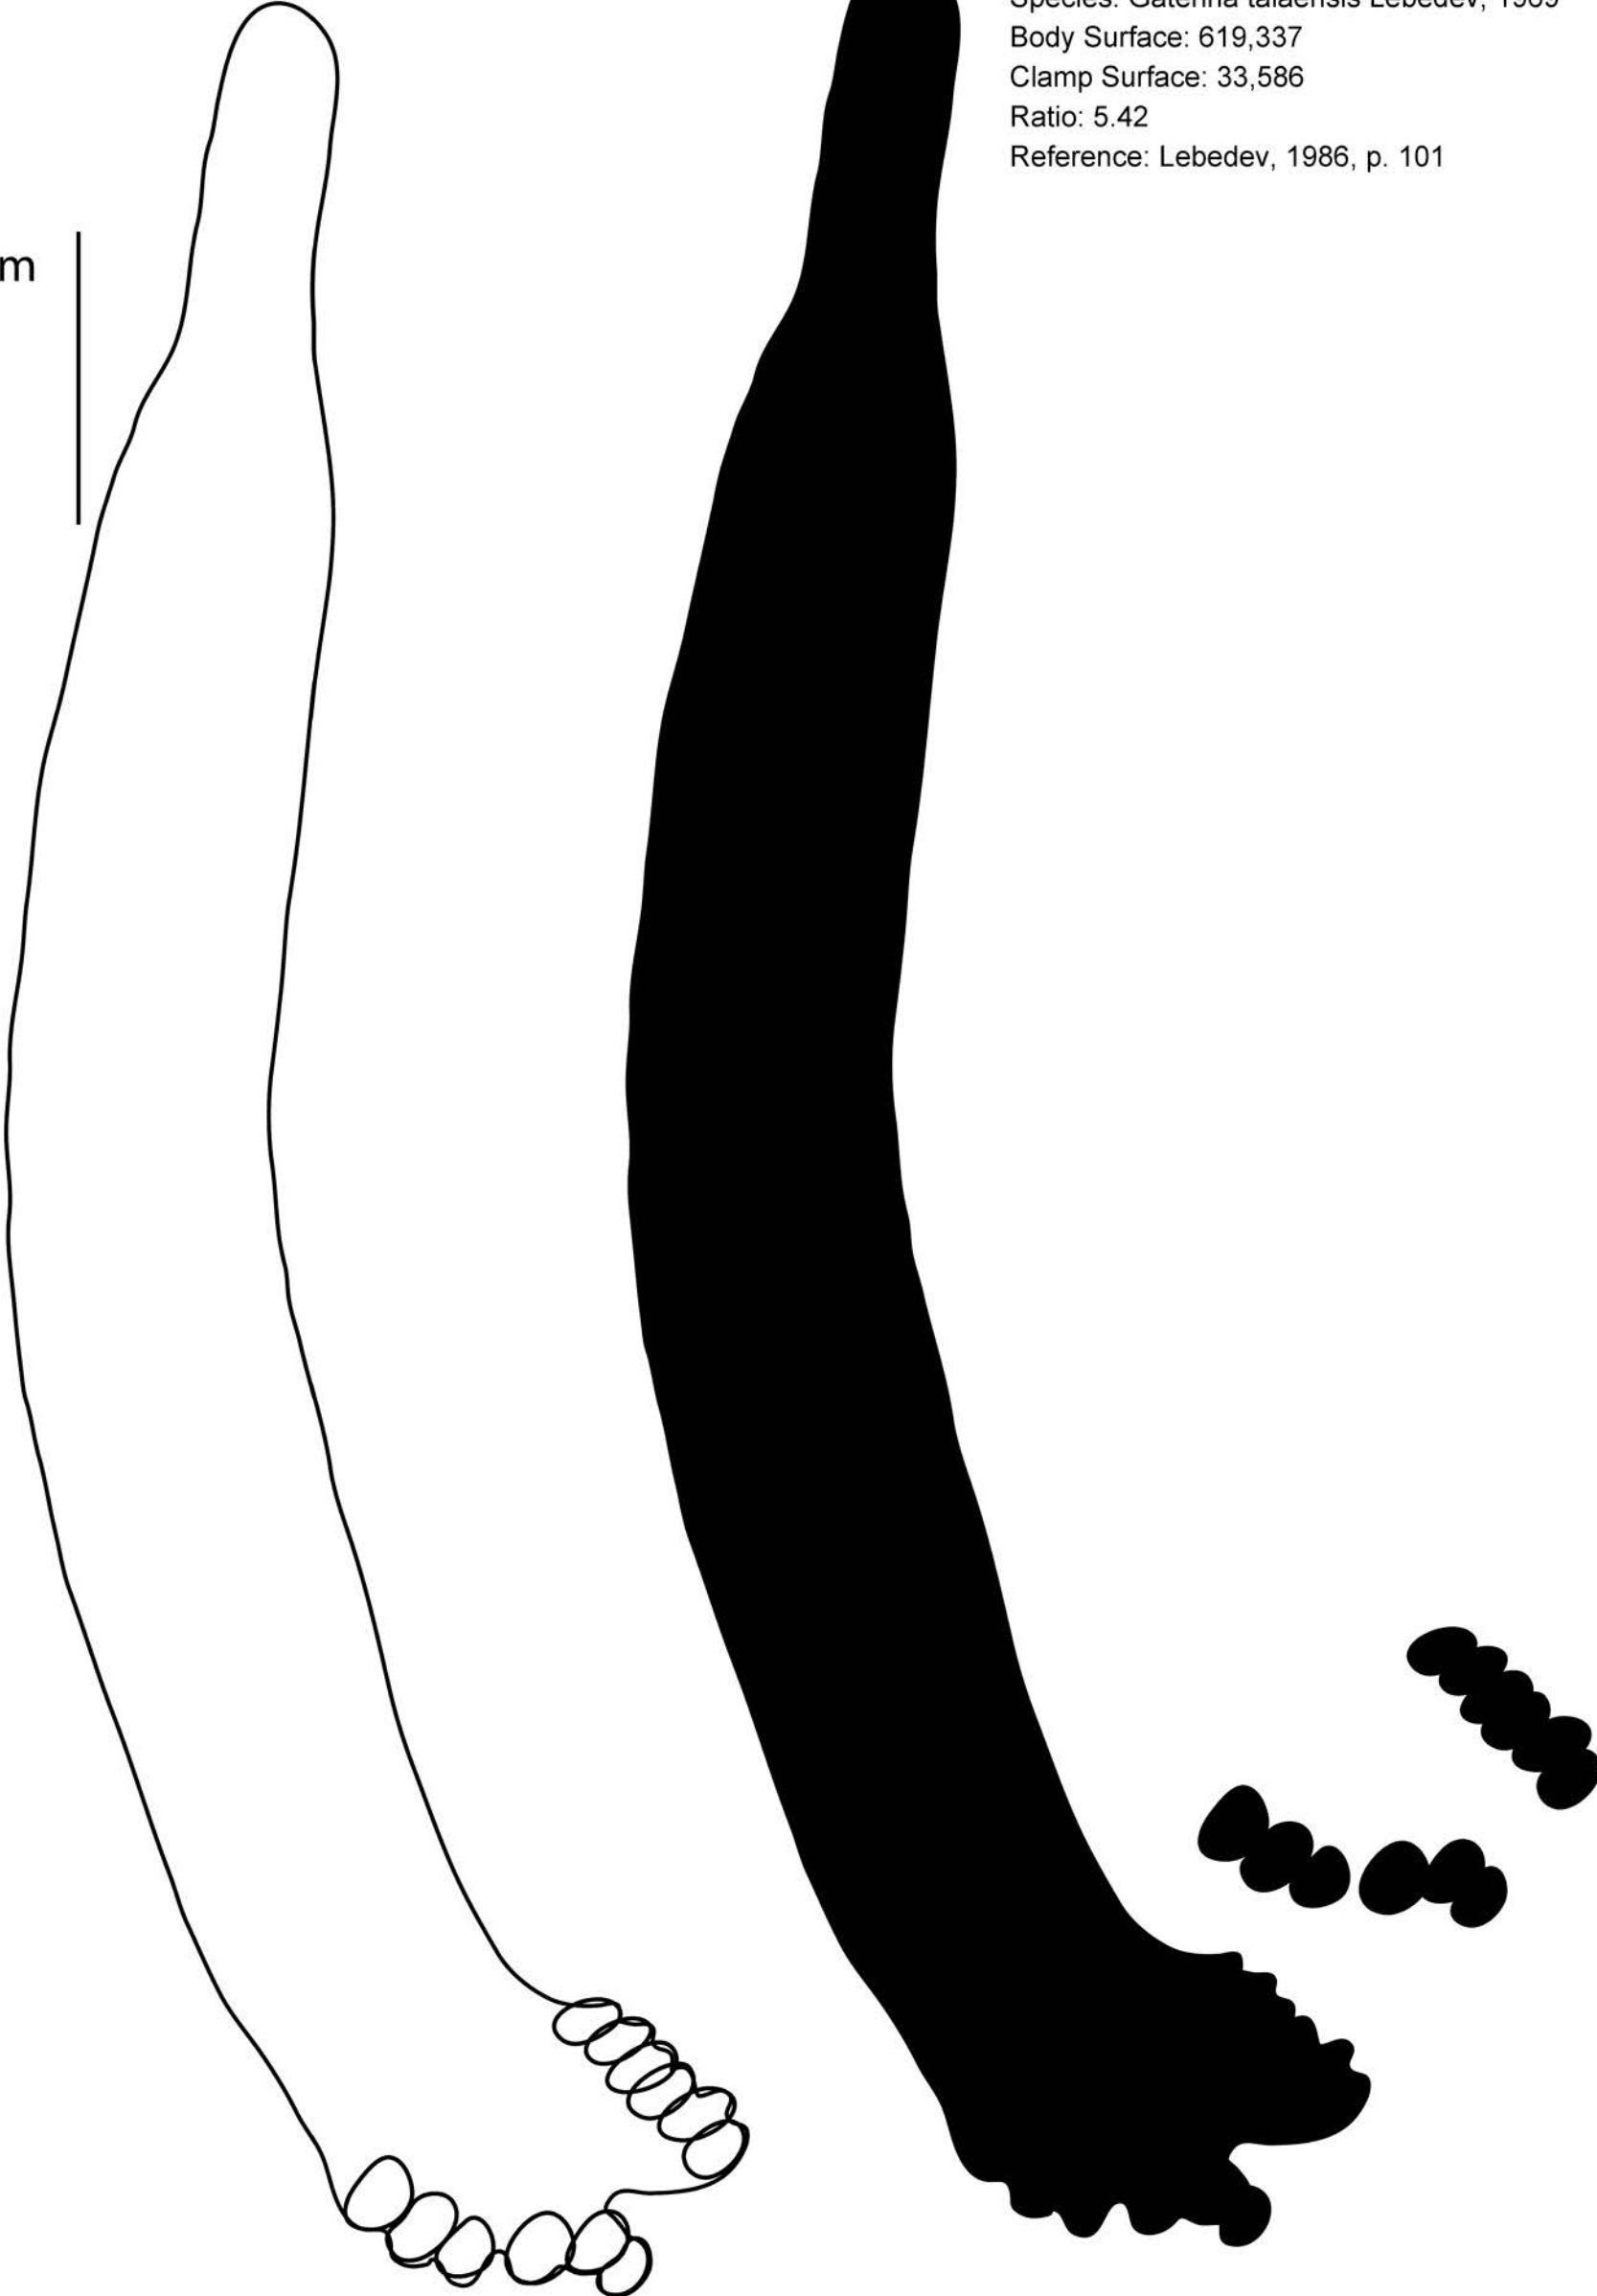

Family: Bychowskicotylidae  
Species: *Tonkinopsis transfretanus* Lebedev, 1972  
Body Surface: 1,236,435  
Clamp Surface: 59,827  
Ratio: 4.84  
Reference: Lebedev, 1986, p. 104

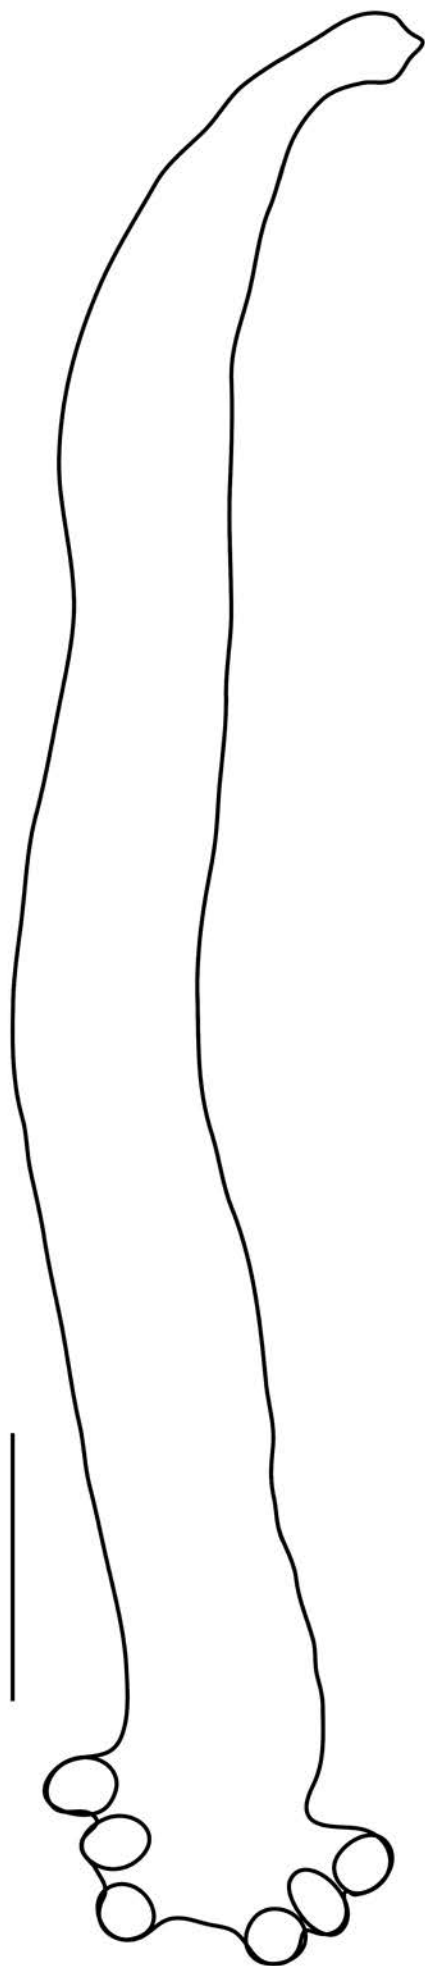

0.5 mm

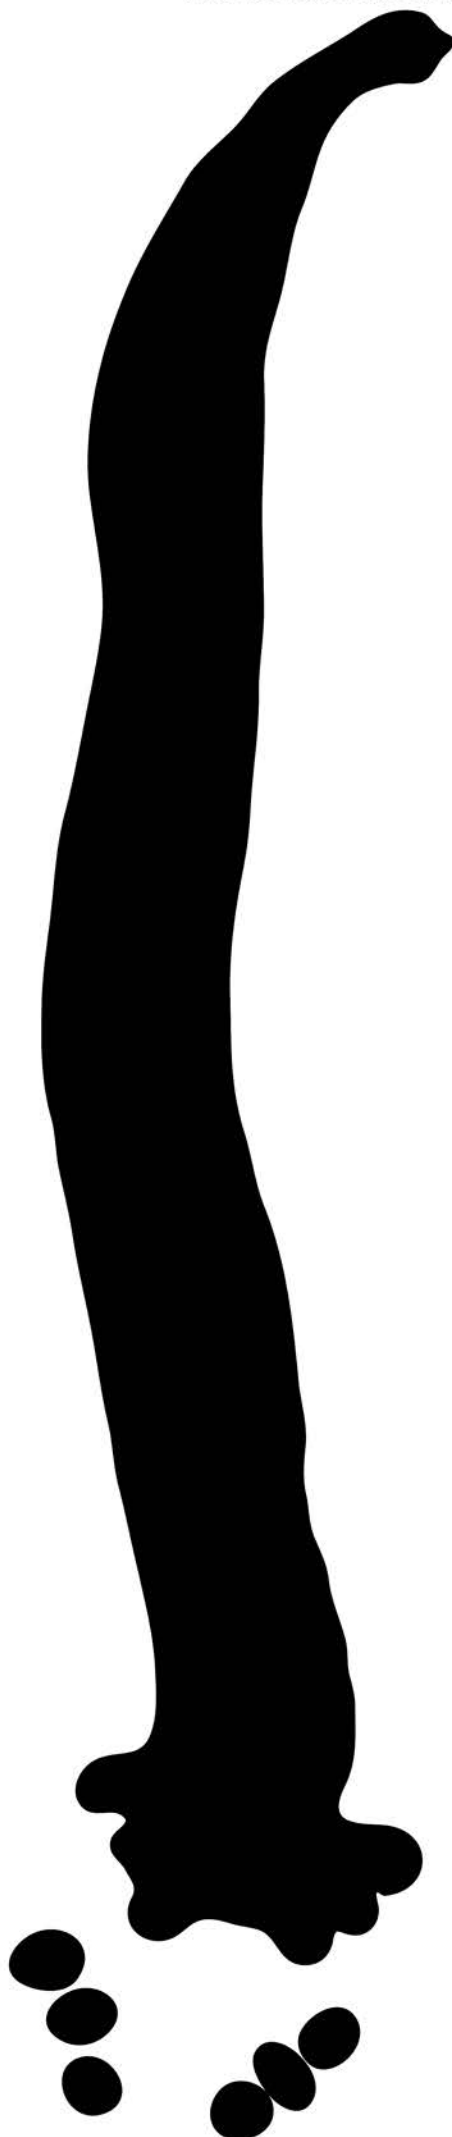

Family: Bychowskicotylidae

Species: *Yamaguticotyla jucunda* (Lebedev, 1969) Lebedev, 1984

Body Surface: 1,189,653

Clamp Surface: 50,151

Ratio: 4.22

Reference: Lebedev, 1986, p. 103

0.5 mm

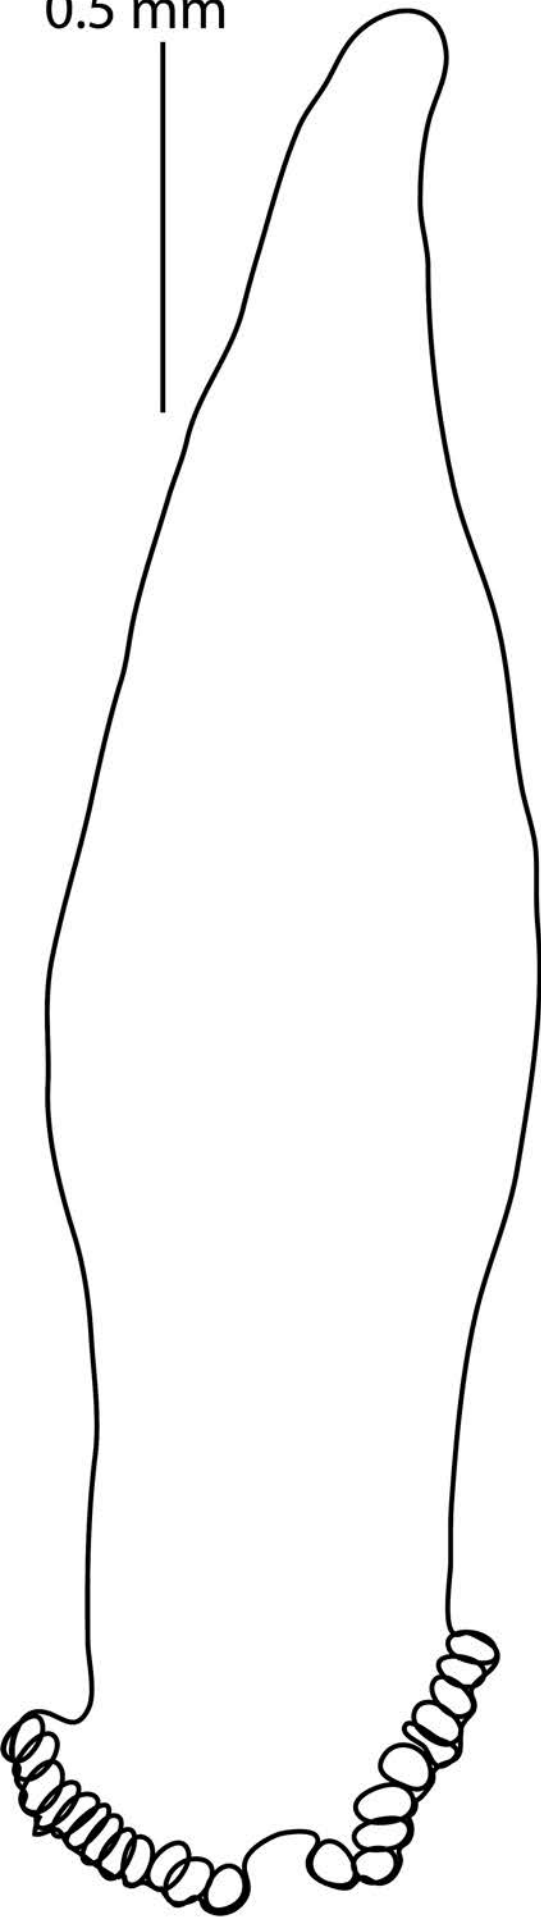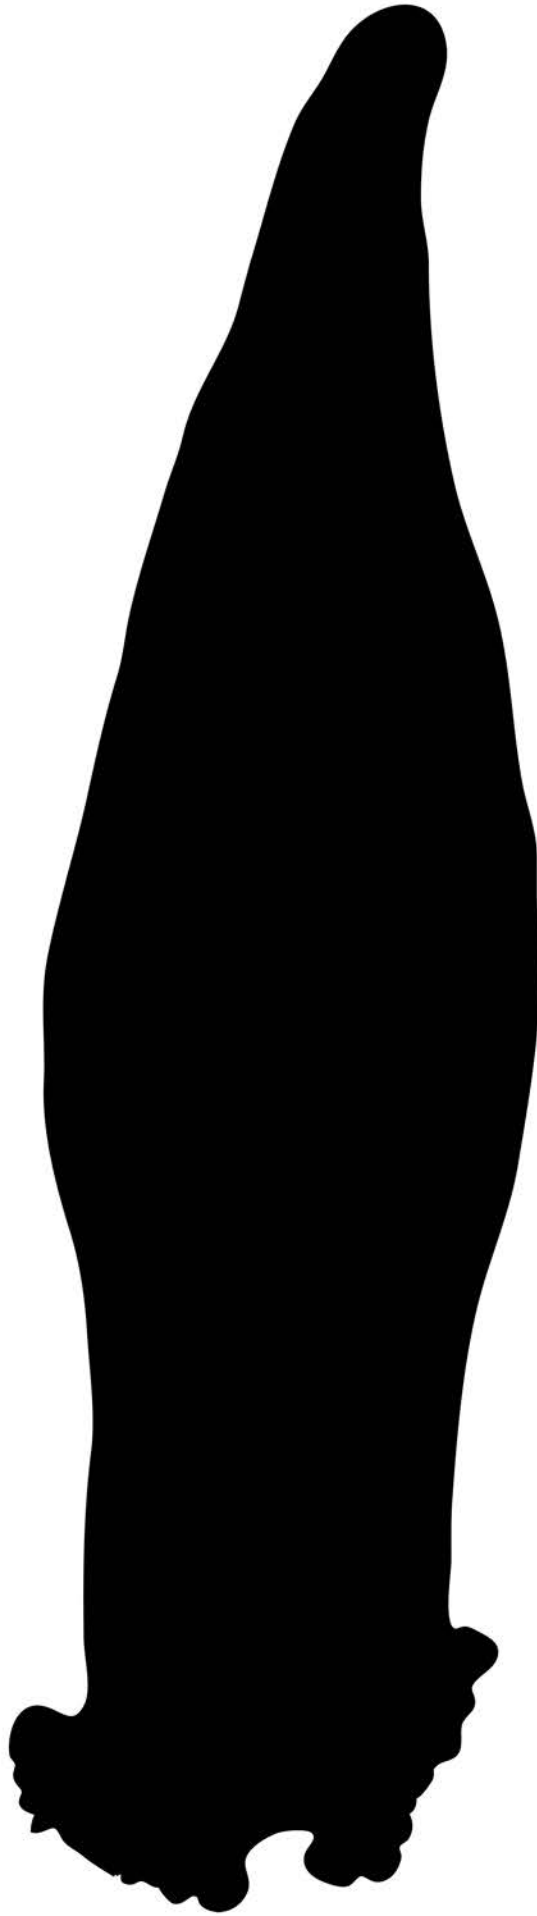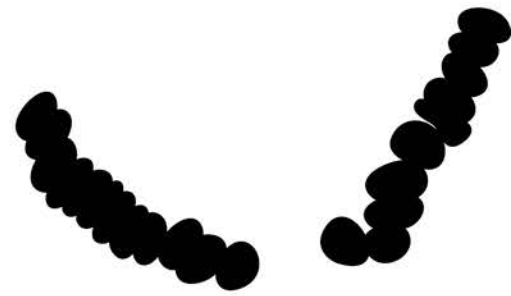

Family: Bychowskicotylidae

Species: Yamaguticotyla truncata (Goto, 1894)

Body Surface: 4,924,003 ;Clamp Surface: 87,494

Ratio: 1.78

Reference: Lebedev, 1986, p. 60

5.23 mm

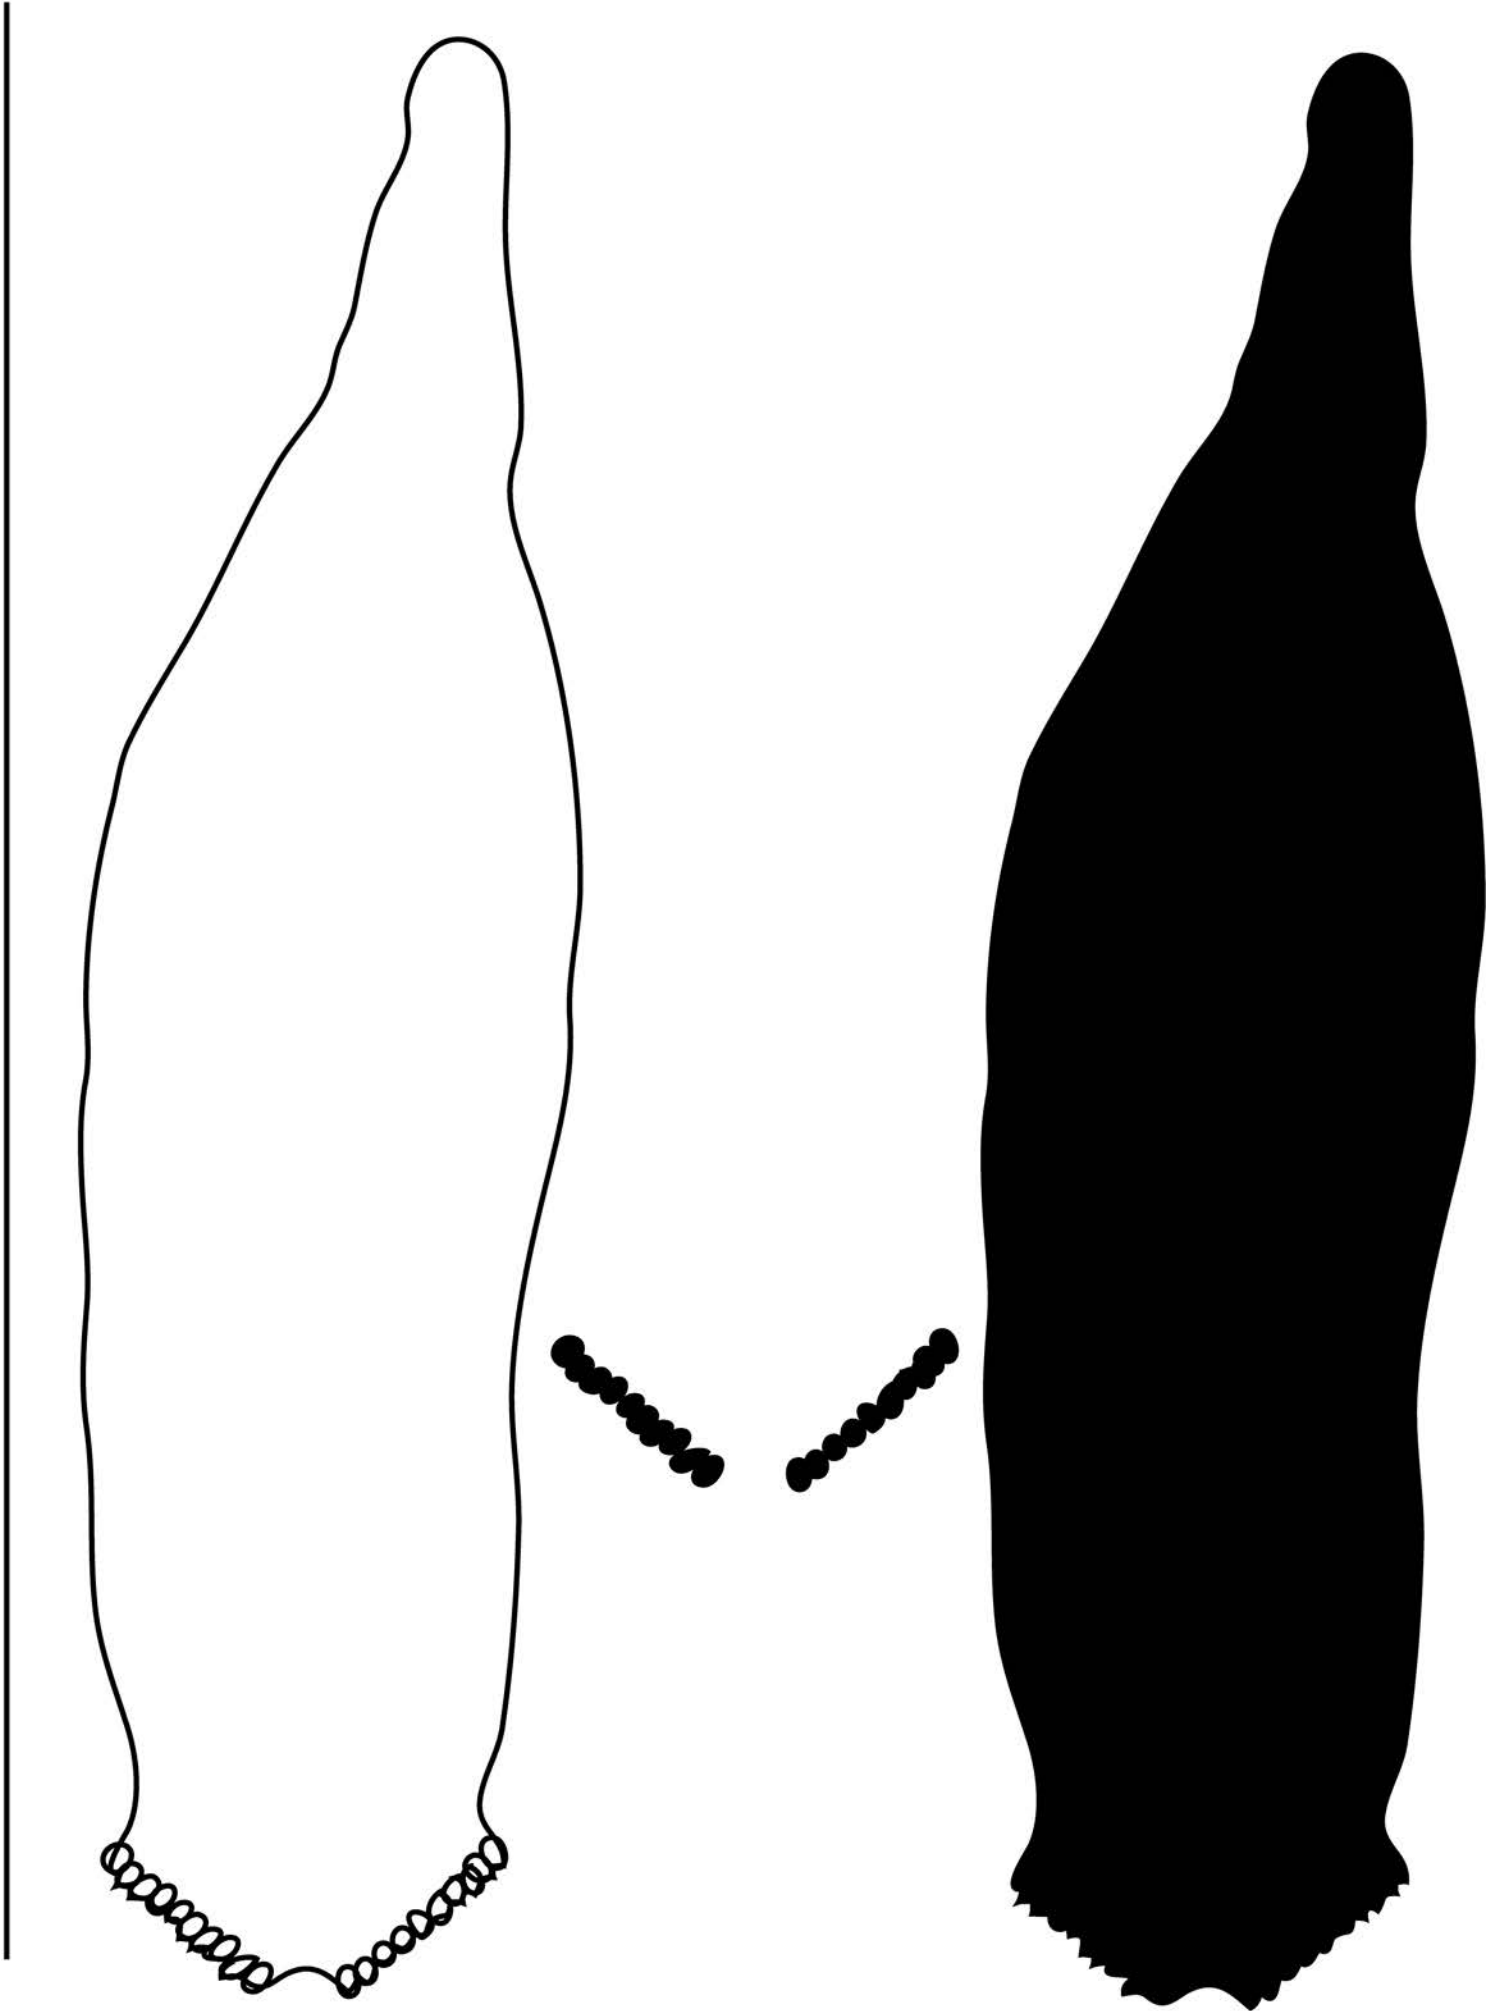



Family: Chauhaneidae

Species: *Ahpua piscicola* Caballero & Bravo-Hollis, 1973

Body Surface: 10,832

Clamp Surface: 404

Ratio: 3.73

Reference: Caballero & Caballero, 1973, p. 39

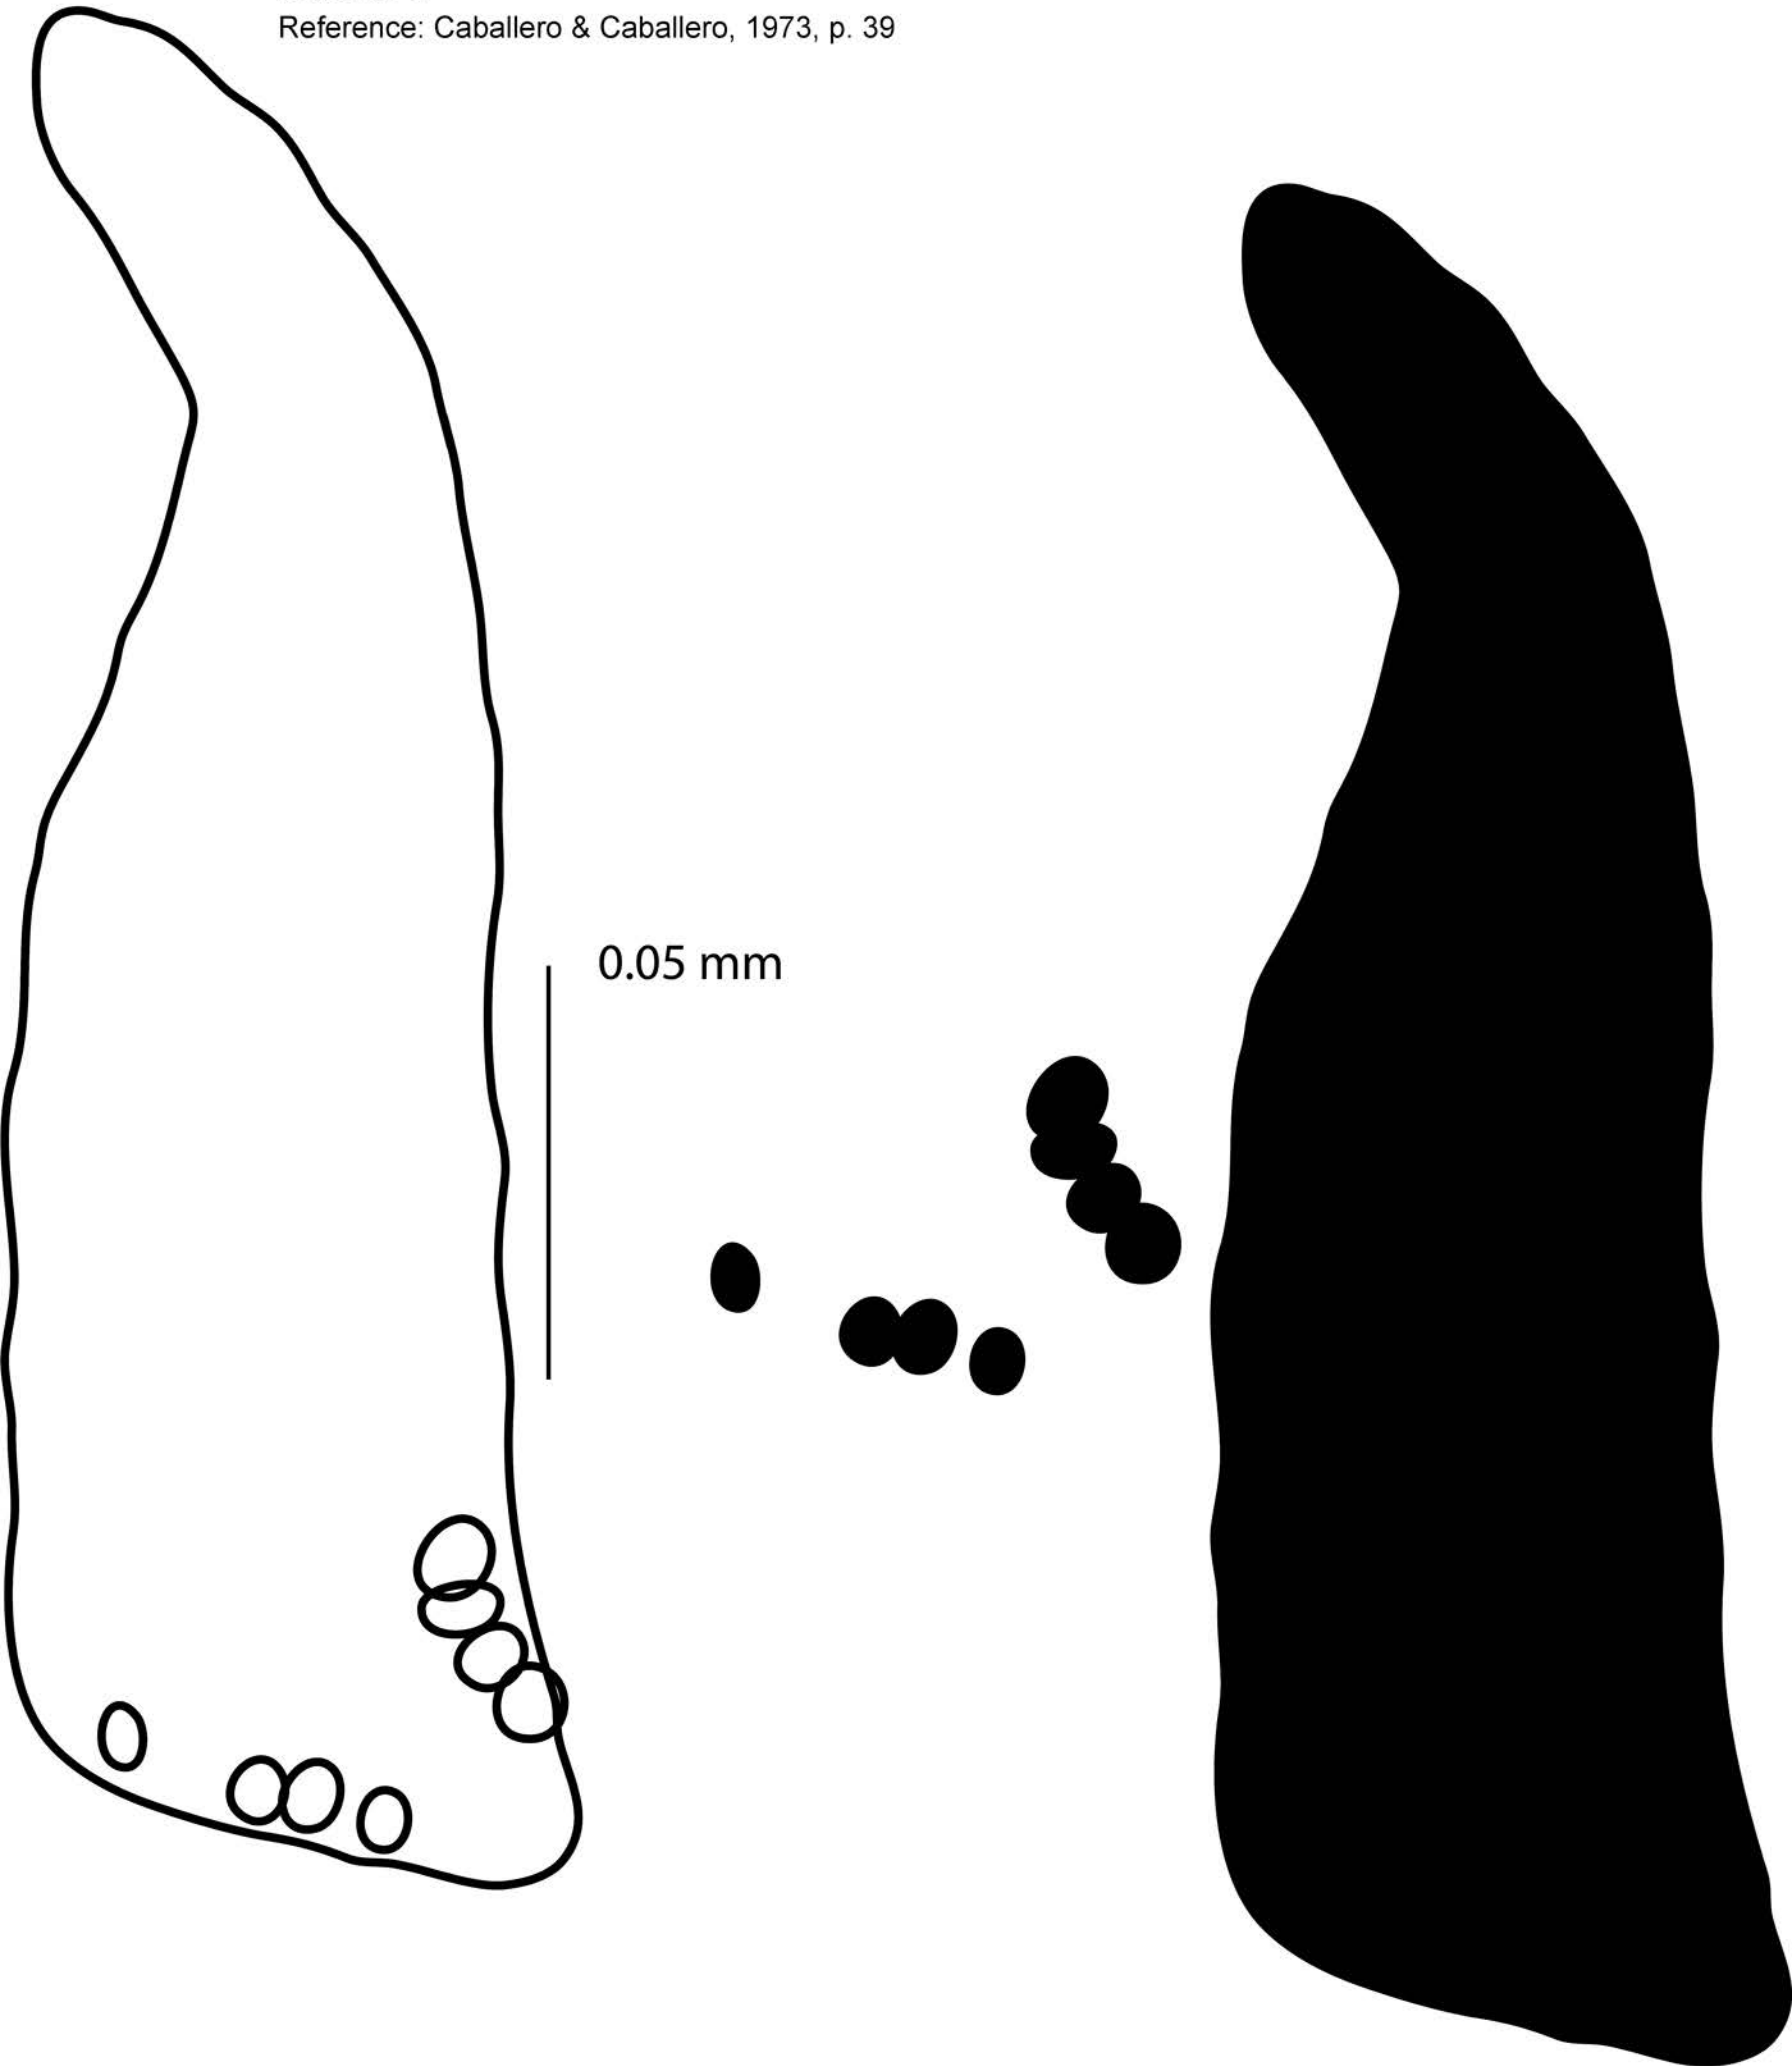

Family: Chauhaneidae

Species: *Allopseudopisthogyne constricta* Yamaguti, 1965

Body Surface: 4,293,278

Clamp Surface: 170,812

Ratio: 3.98

reference: Yamaguti, 1966, p. 75

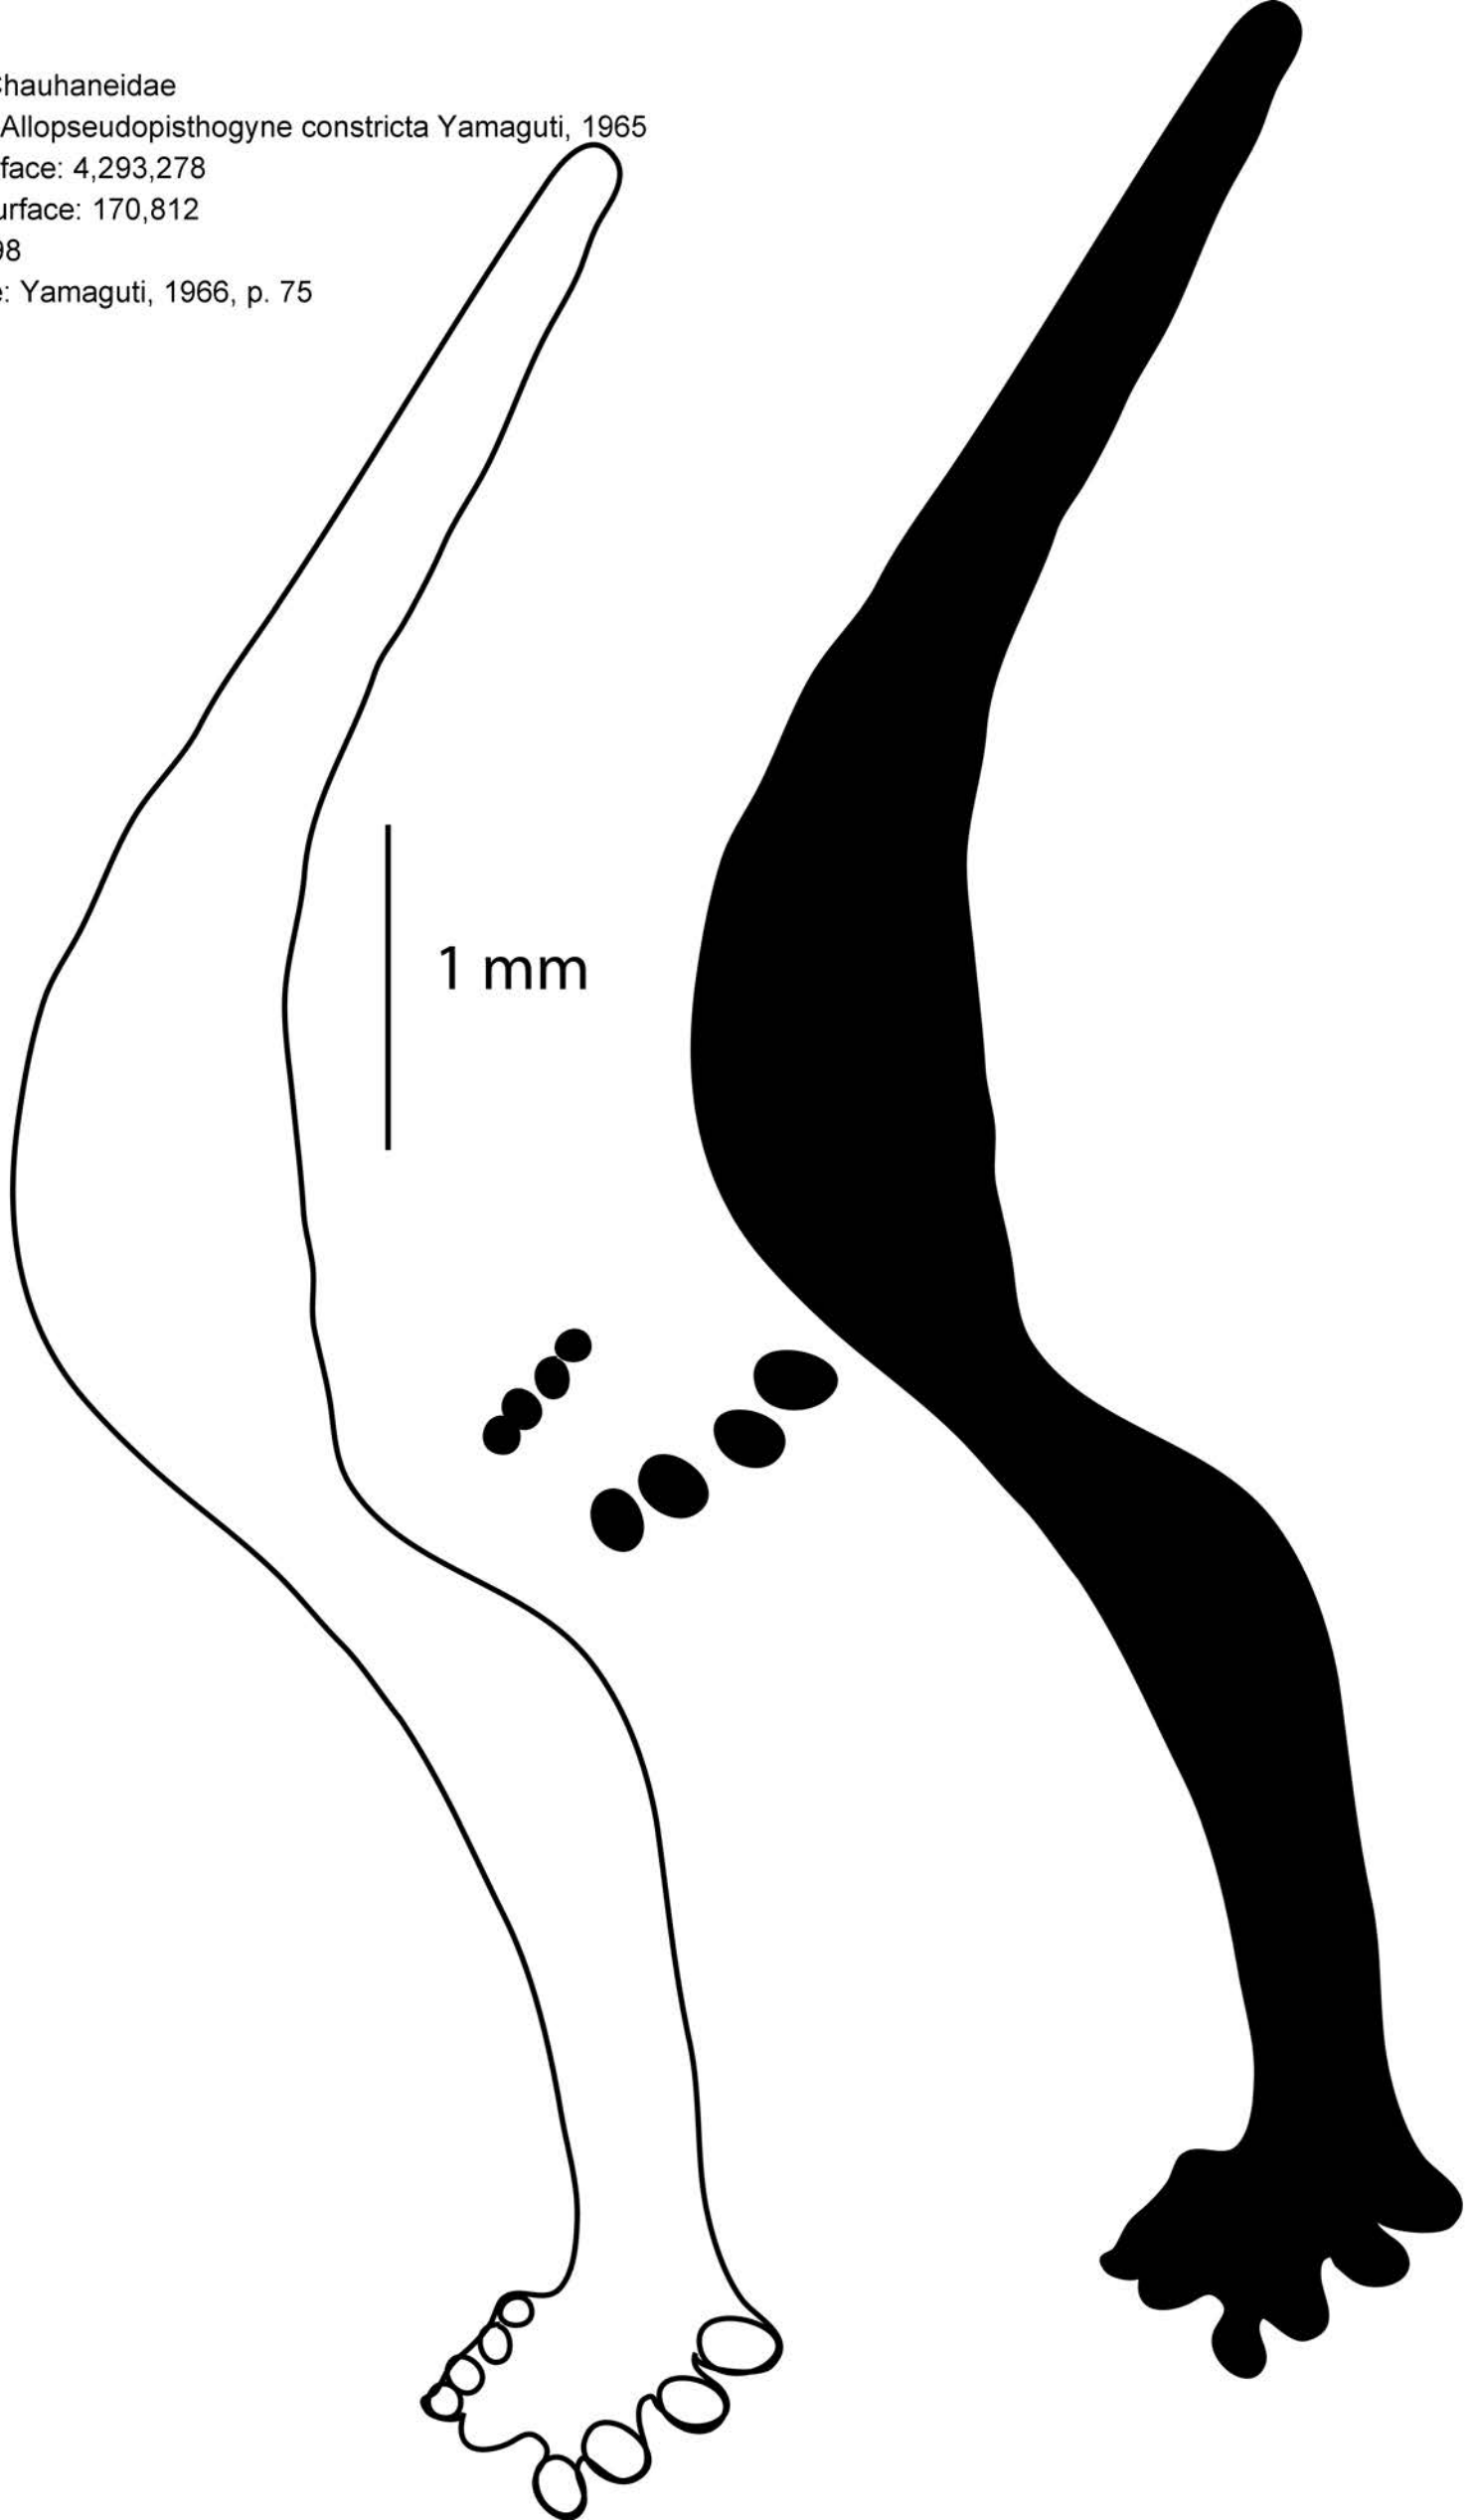

Family: Chauhaneidae

Species: *Caniongiella australis* (Young, 1968) Lebedev, 1976

Body Surface: 624,748

Clamp Surface: 7,033

Ratio: 1.1

Reference: Lebedev, 1986, p. 127

1.67 mm

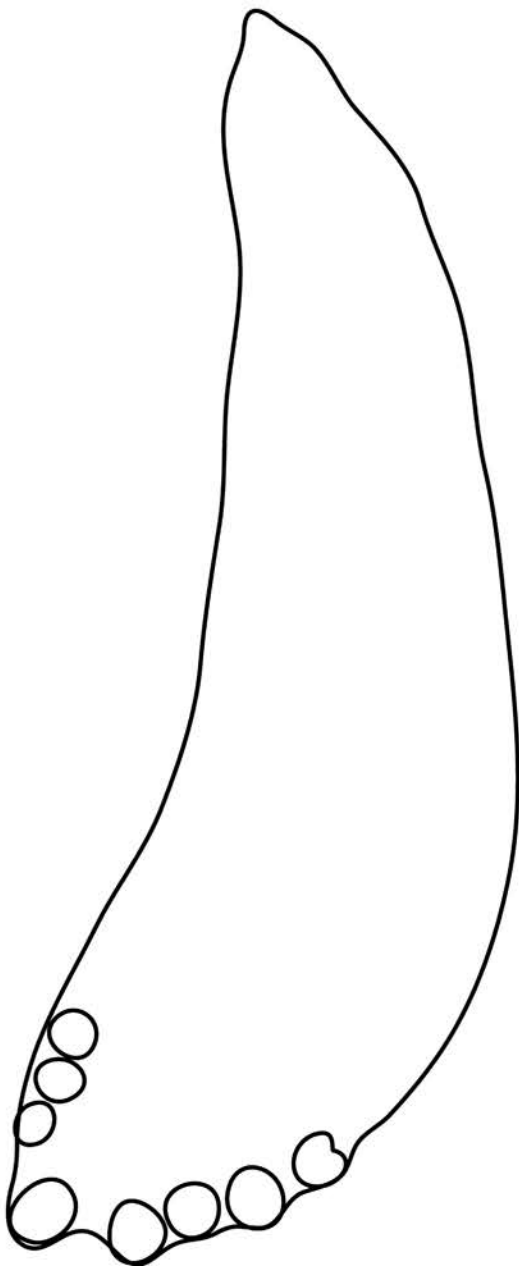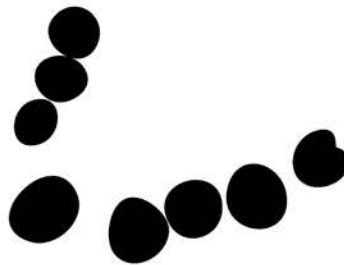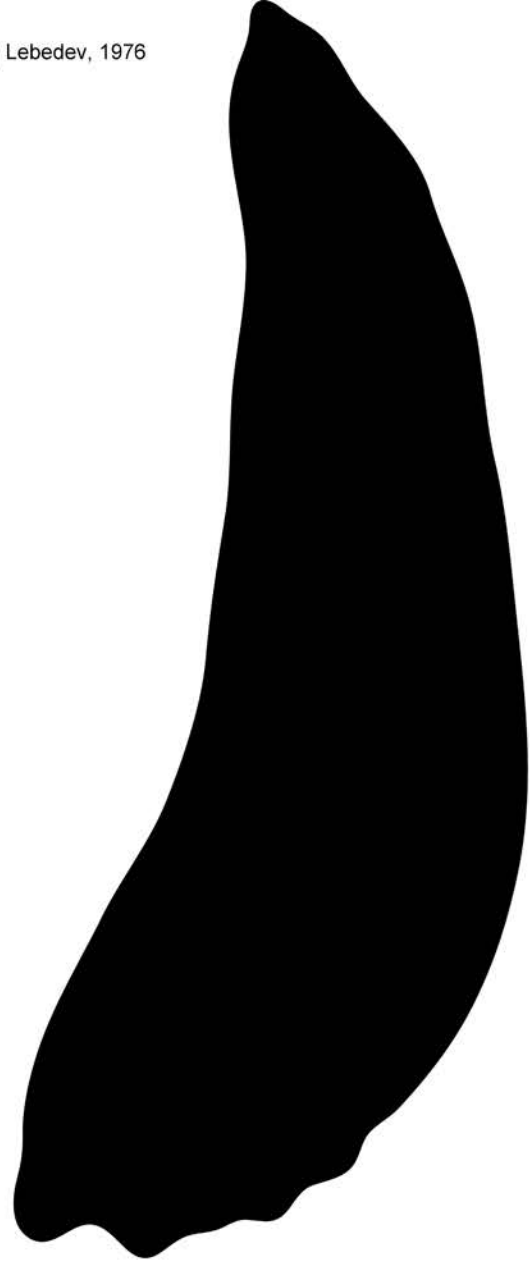

Family: Chauhaneidae

Species: *Caniongiella bychowskyi* Lebedev, 1976

Body Surface: 1,204,269

Clamp Surface: 26,531

Ratio: 2.20

Reference: Lebedev, 1986, p. 126

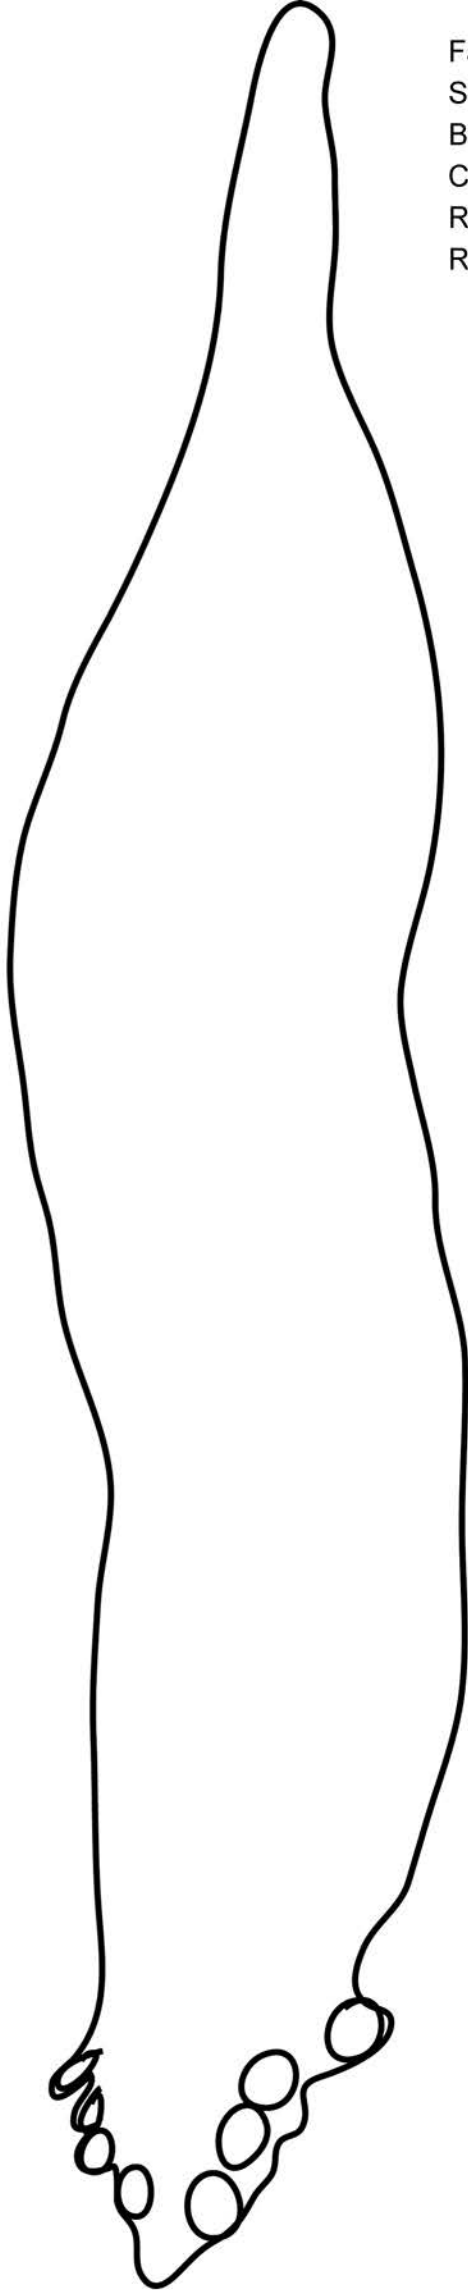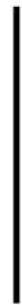

0.4 mm

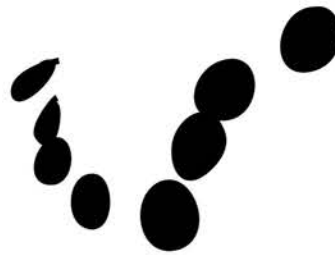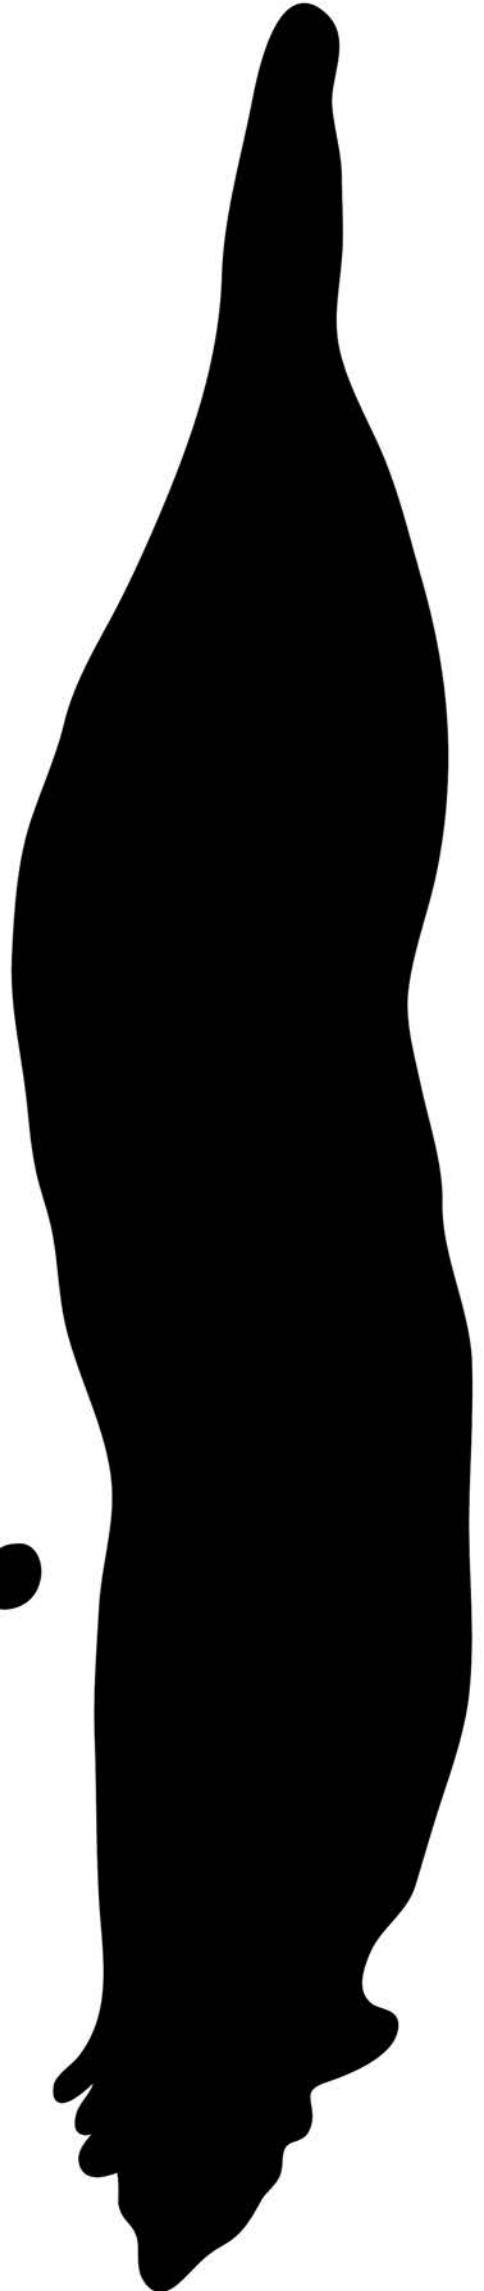

Family: Chauhaneidae  
Species: *Chauhanea madrasensis* Ramalingam, 1953  
Body Surface: 2,631,446  
Clamp Surface: 172,925  
Ratio: 6.57  
Reference: Lebedev, 1986, p. 120

0.5 mm

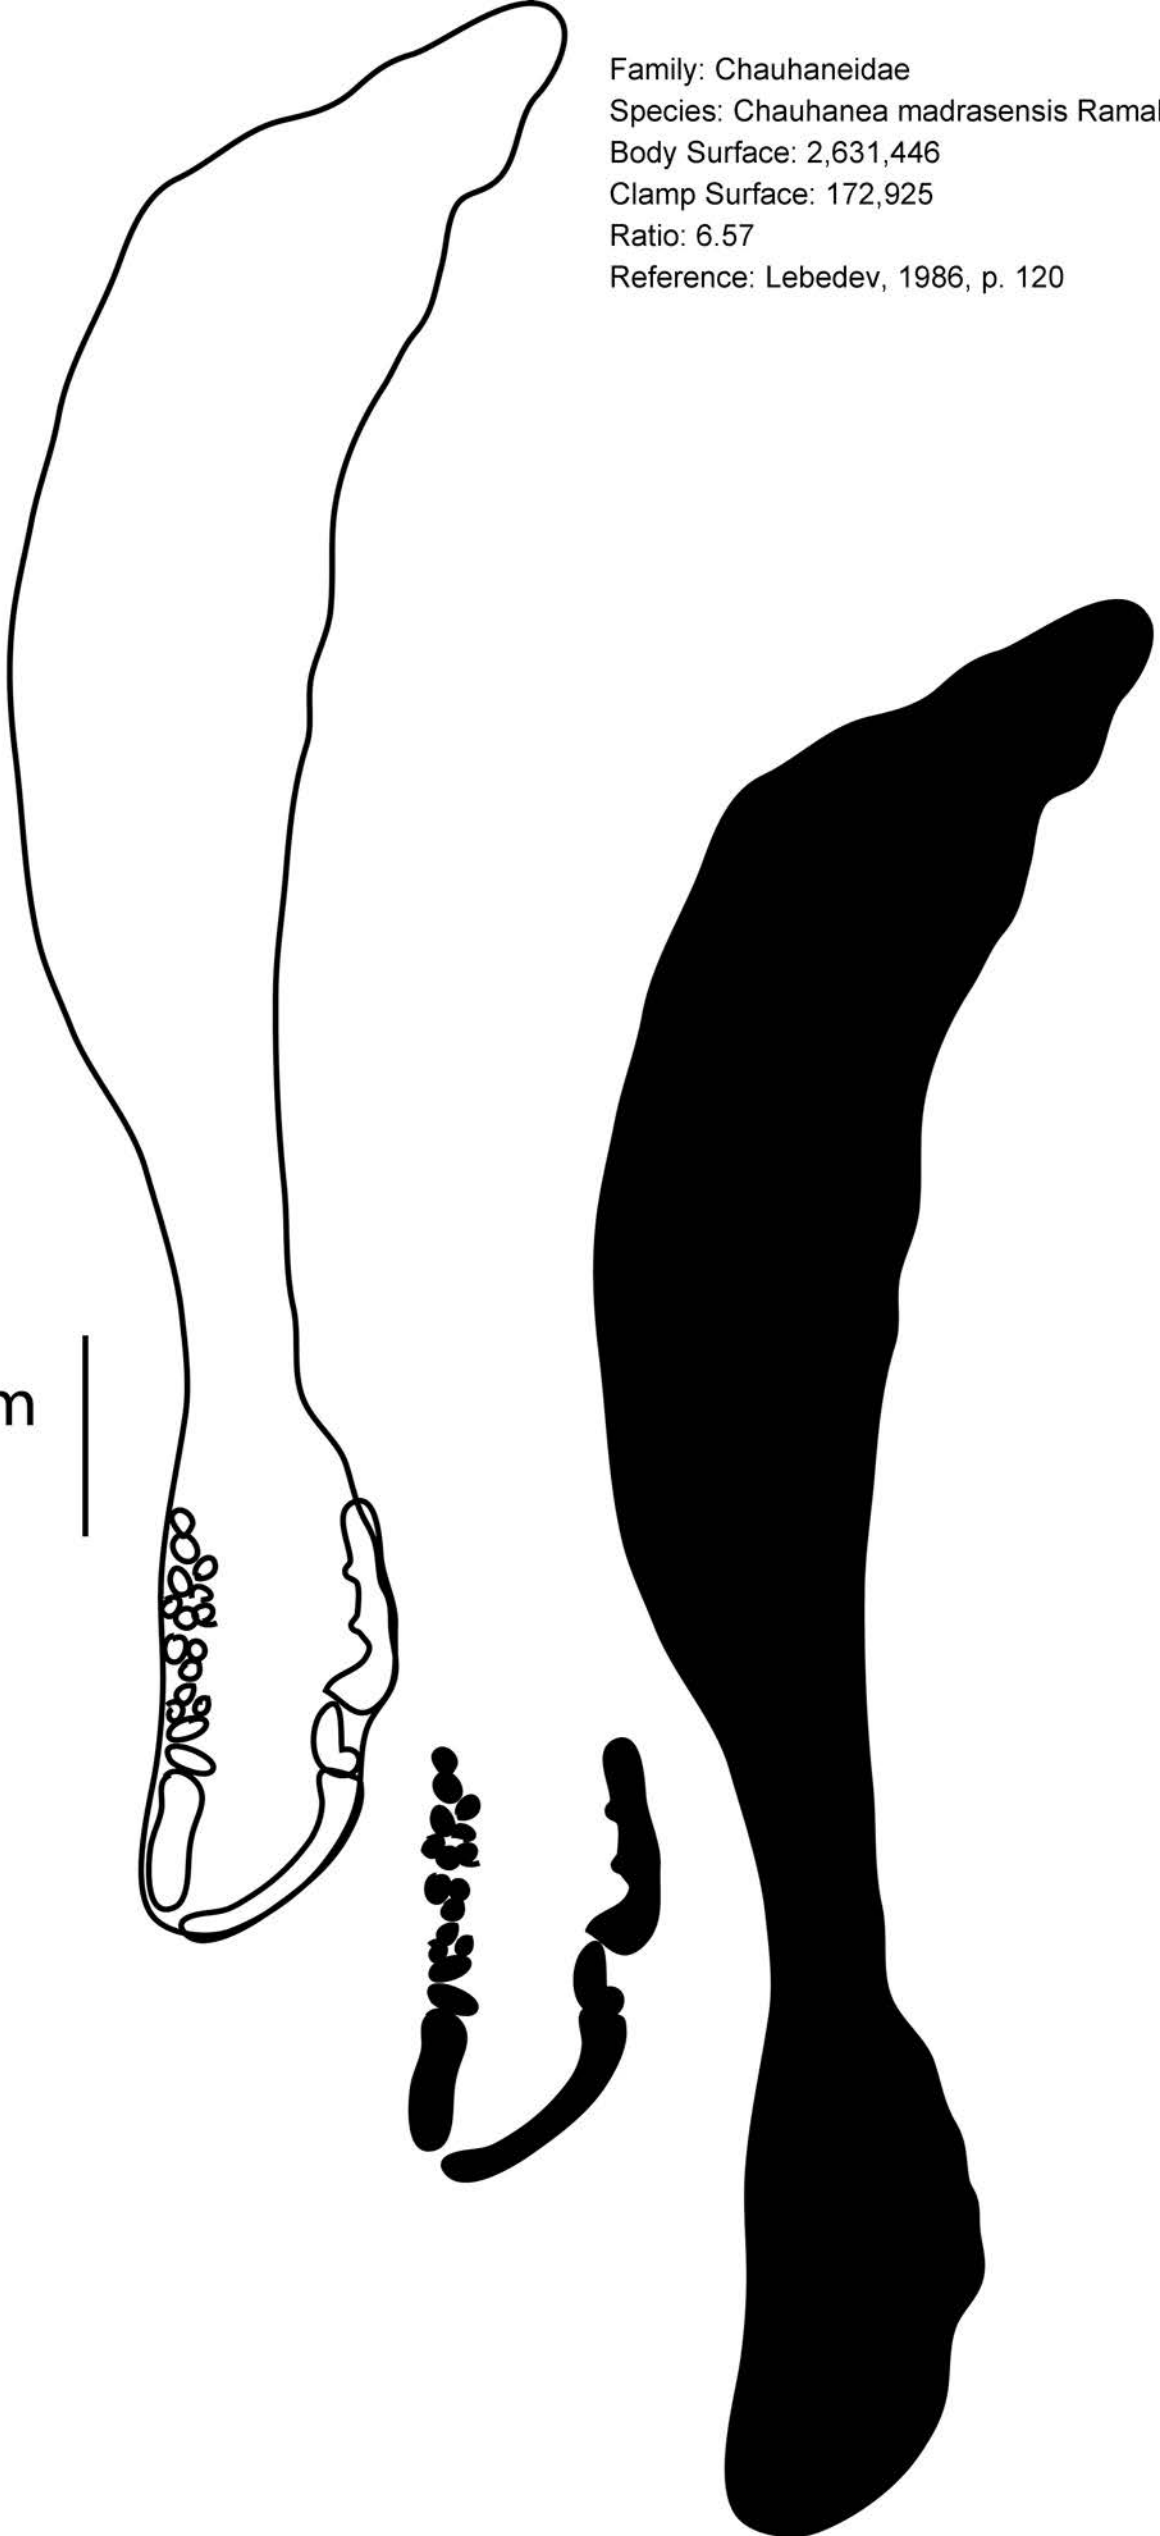

Family: Chauhaneidae

Species: *Chauhanea mediterranea* Euzet & Trilles, 1960

Body Surface: 3,309,353

Clamp Surface: 305,081

Ratio: 9.22

Reference: Euzet & Trilles, 1960, p. 190

1 mm

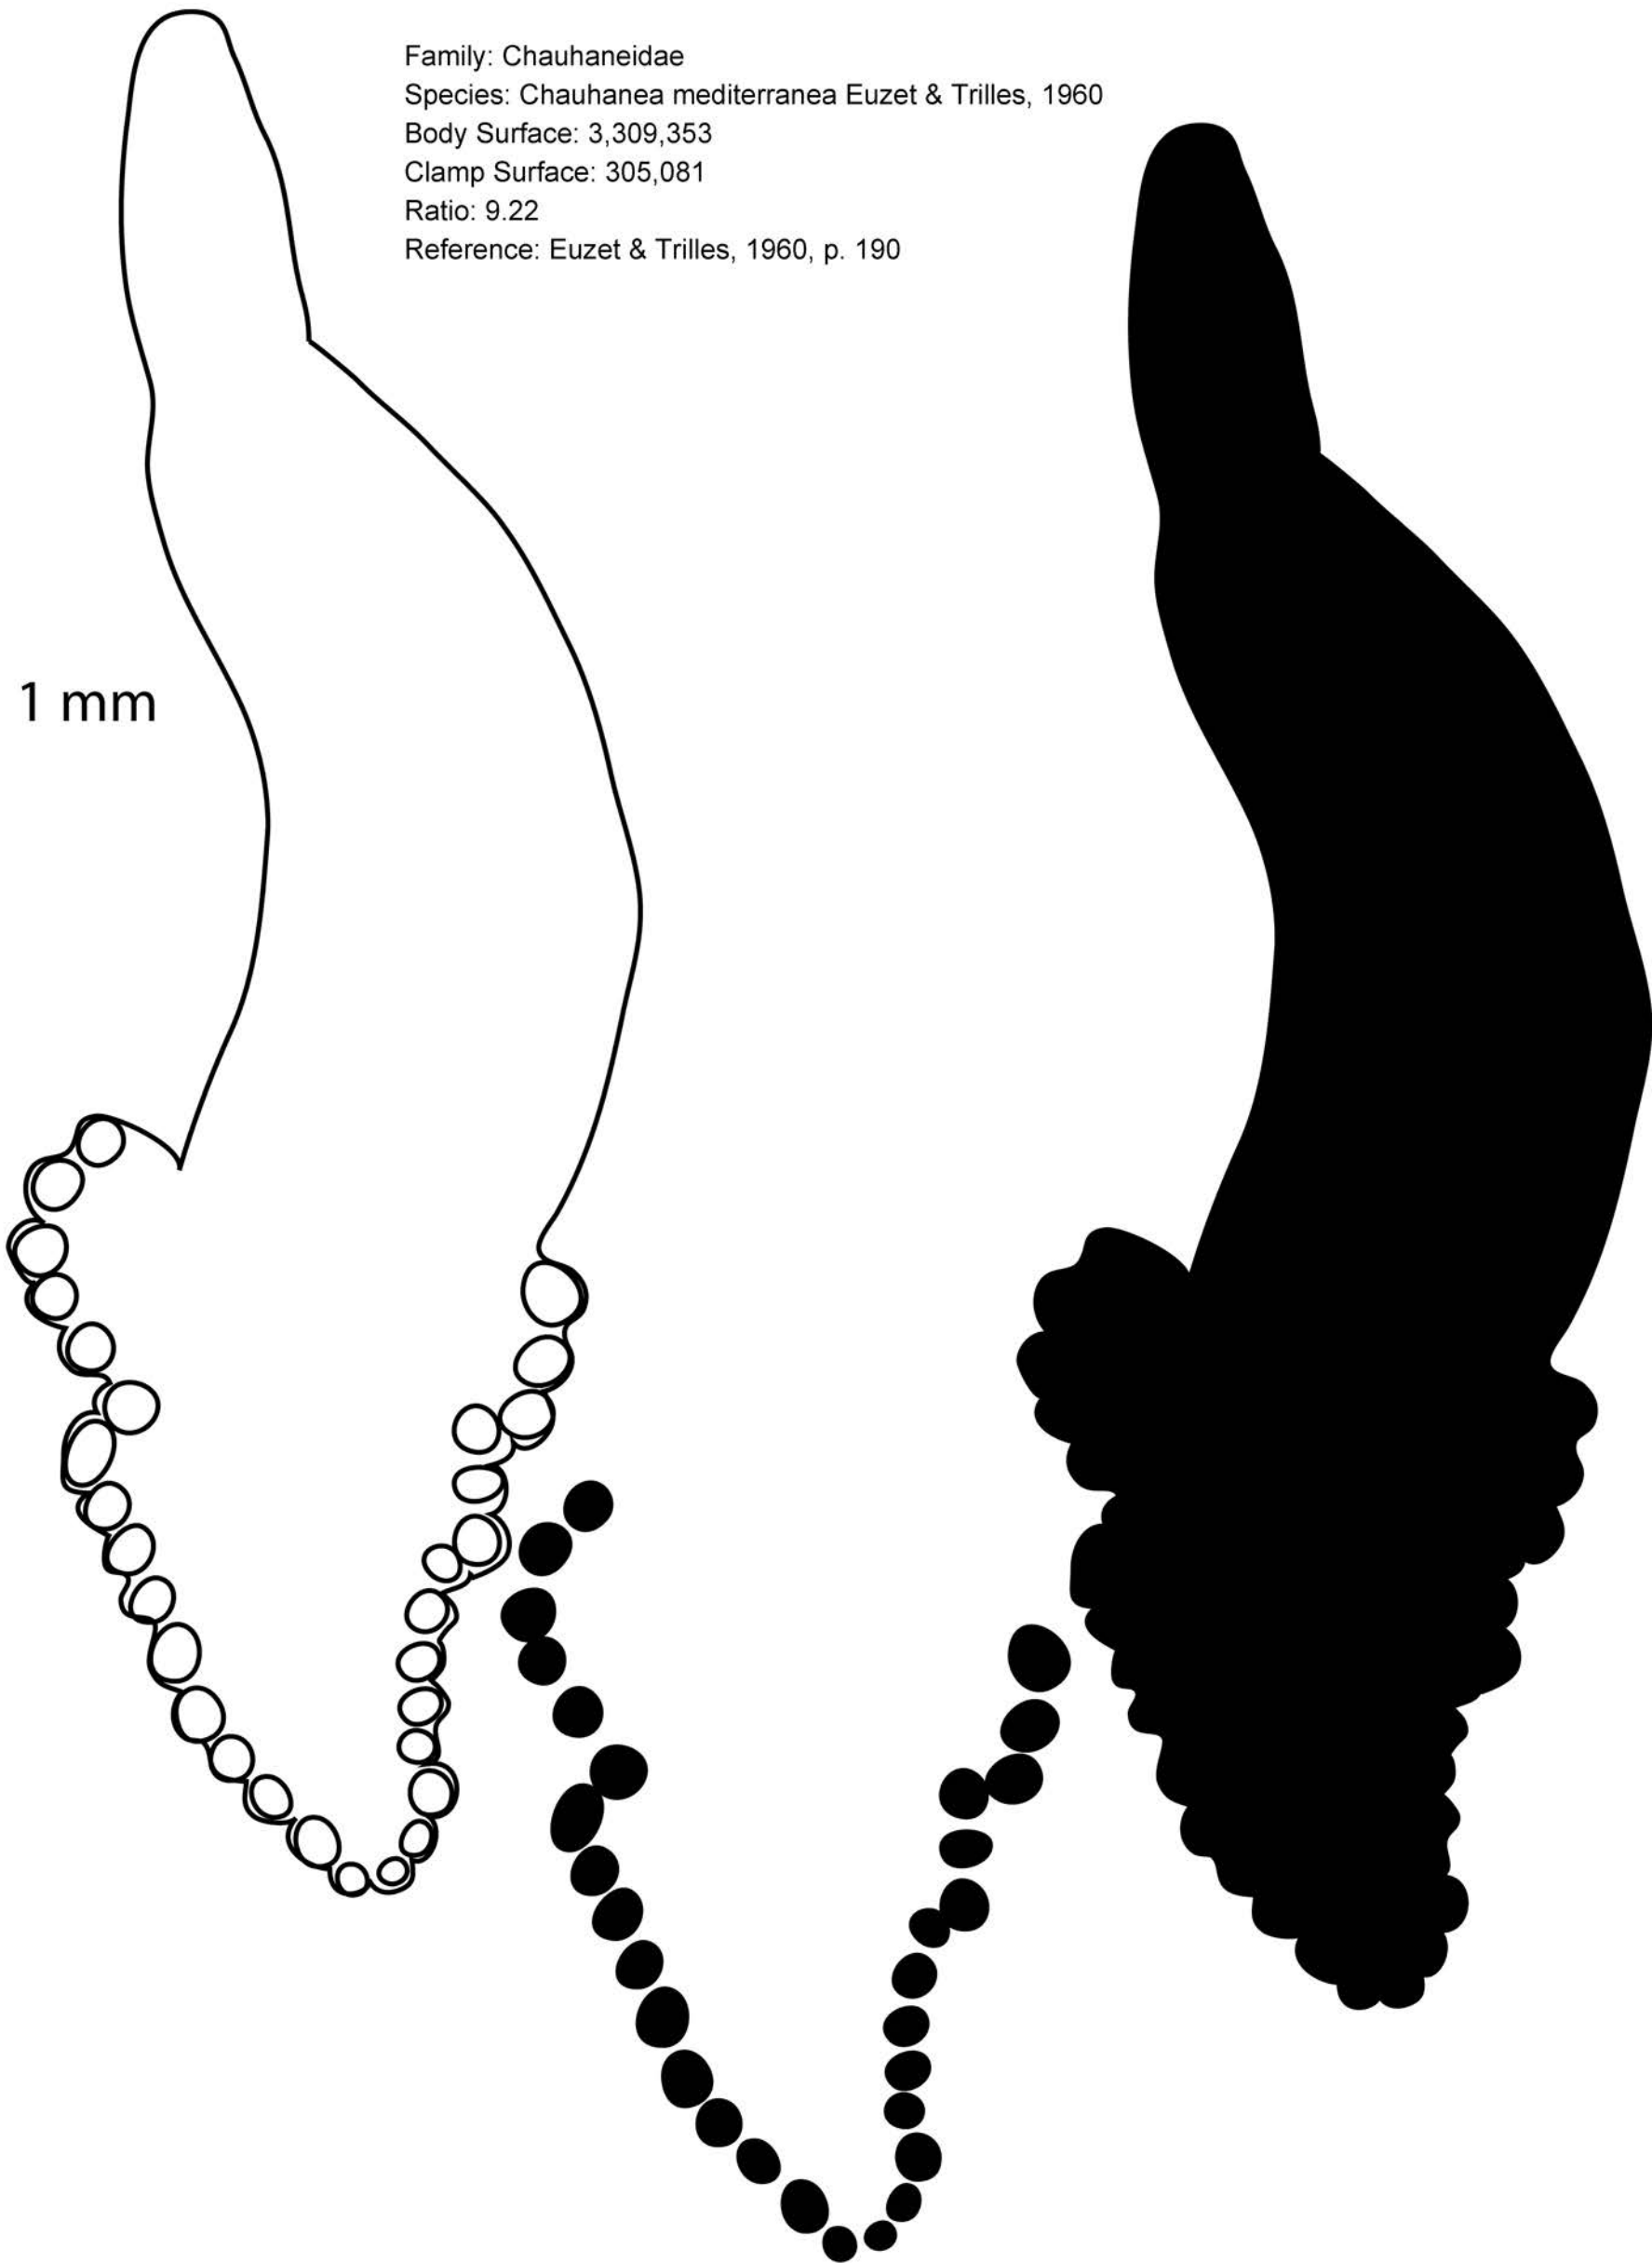

Family: Chauhaneidae  
Species: *Gemmaecaputia corrugata*  
Tripathi, 1959  
Body Surface: 404,195  
Clamp Surface: 13,015  
Ratio: 3.22  
Reference: Yamaguti, 1963, p. 487

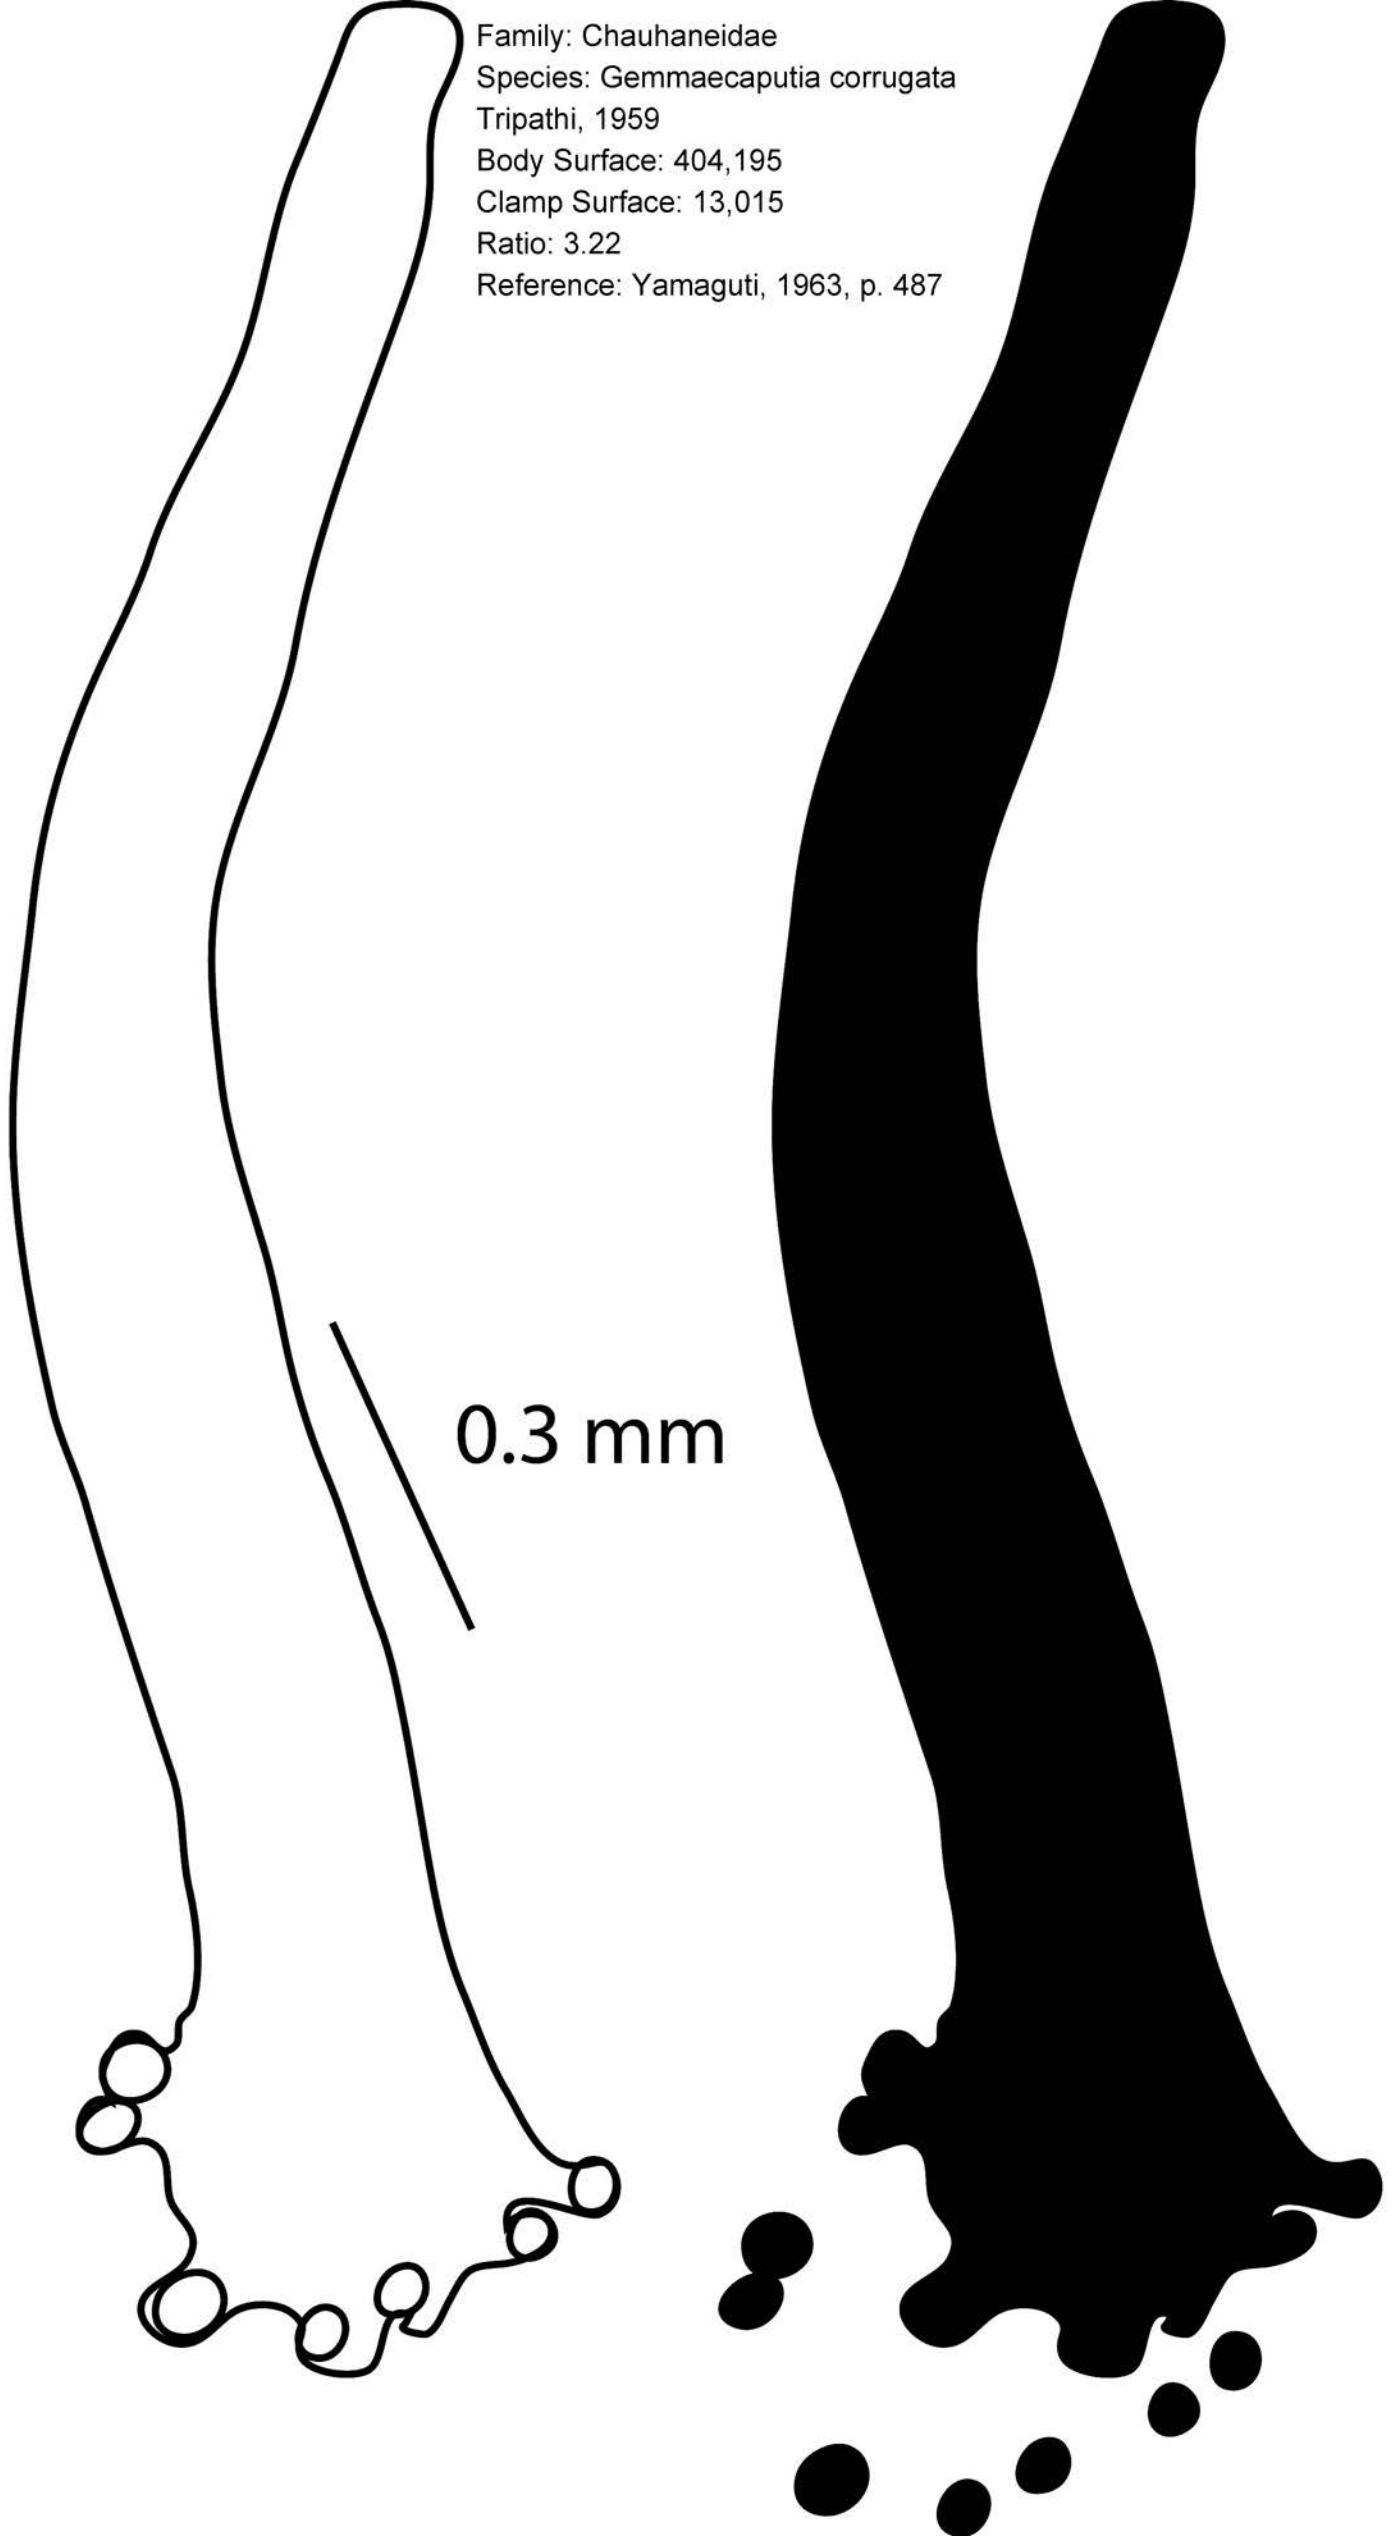

Family: Chauhaneidae  
Species: *Metopisthogyne*  
*sphyraenae* Yamaguti, 1966  
Body Surface: 3,415,824  
Clamp Surface: 337,042  
Ratio: 9.87  
Reference:  
Yamaguti, 1966, p. 426

1 mm

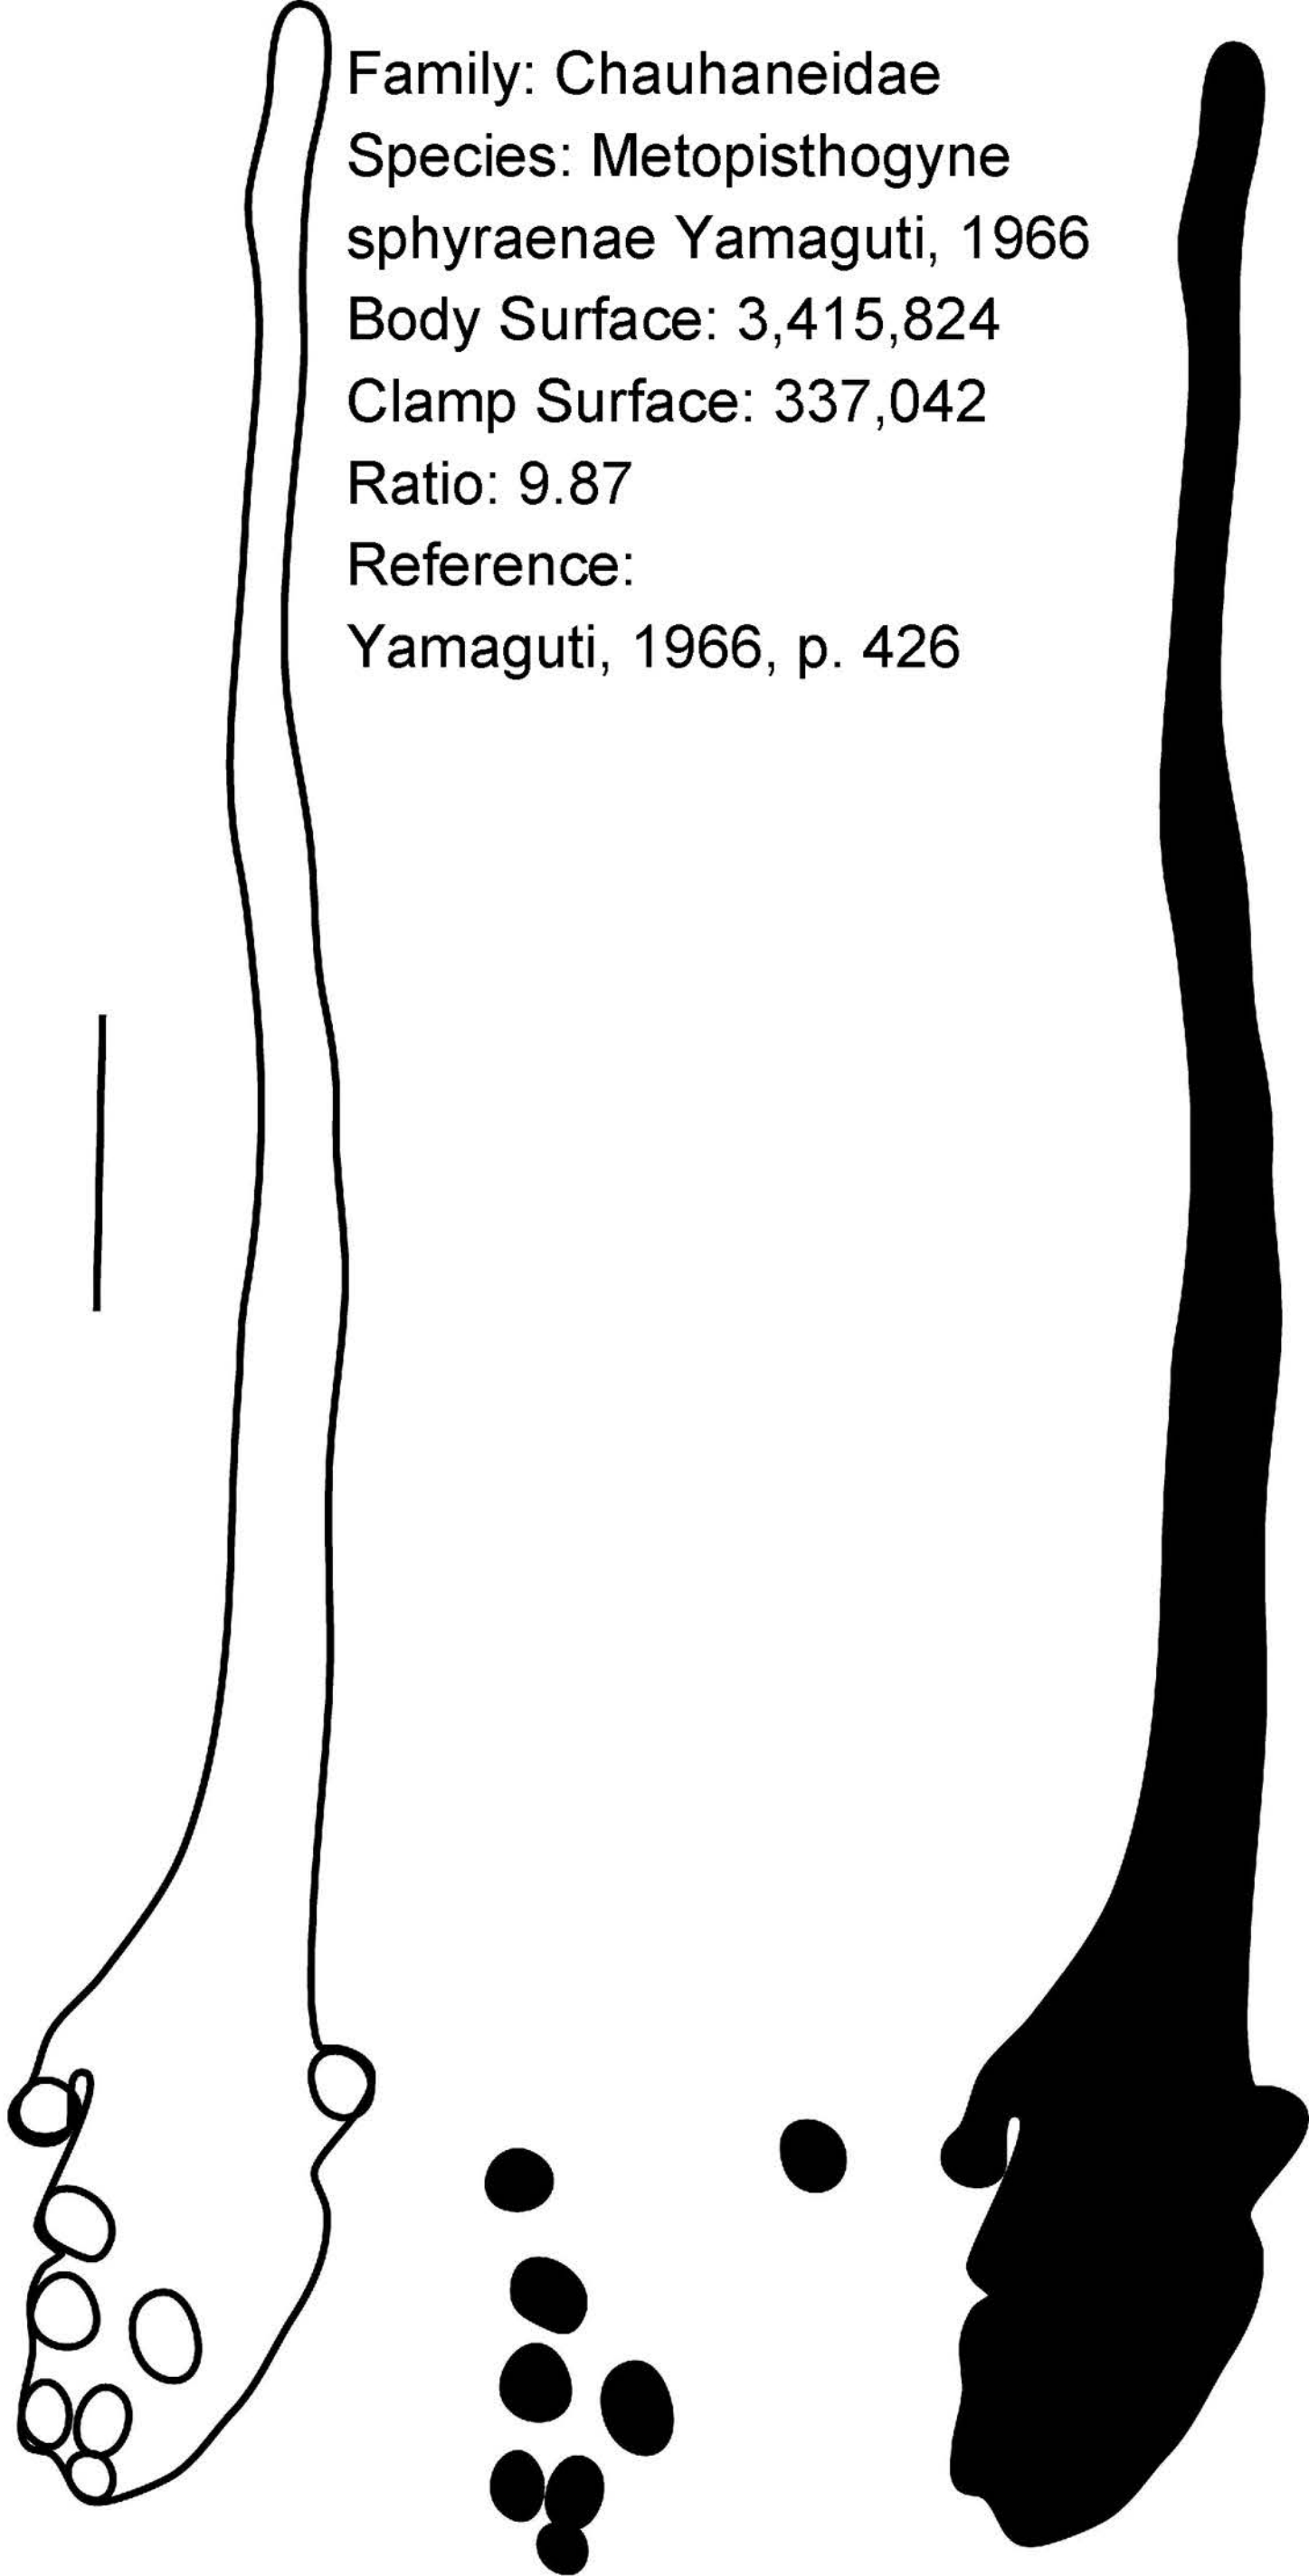



Family: Chauhaneidae

Species: *Oaxacotyle oaxacensis*

(Caballero & Bravo, 1964) Lebedev, 1984

Body Surface: 397,303 ; Clamp Surface: 56,968

Ratio: 14.34

Reference: Lebedev, 1986, p. 138

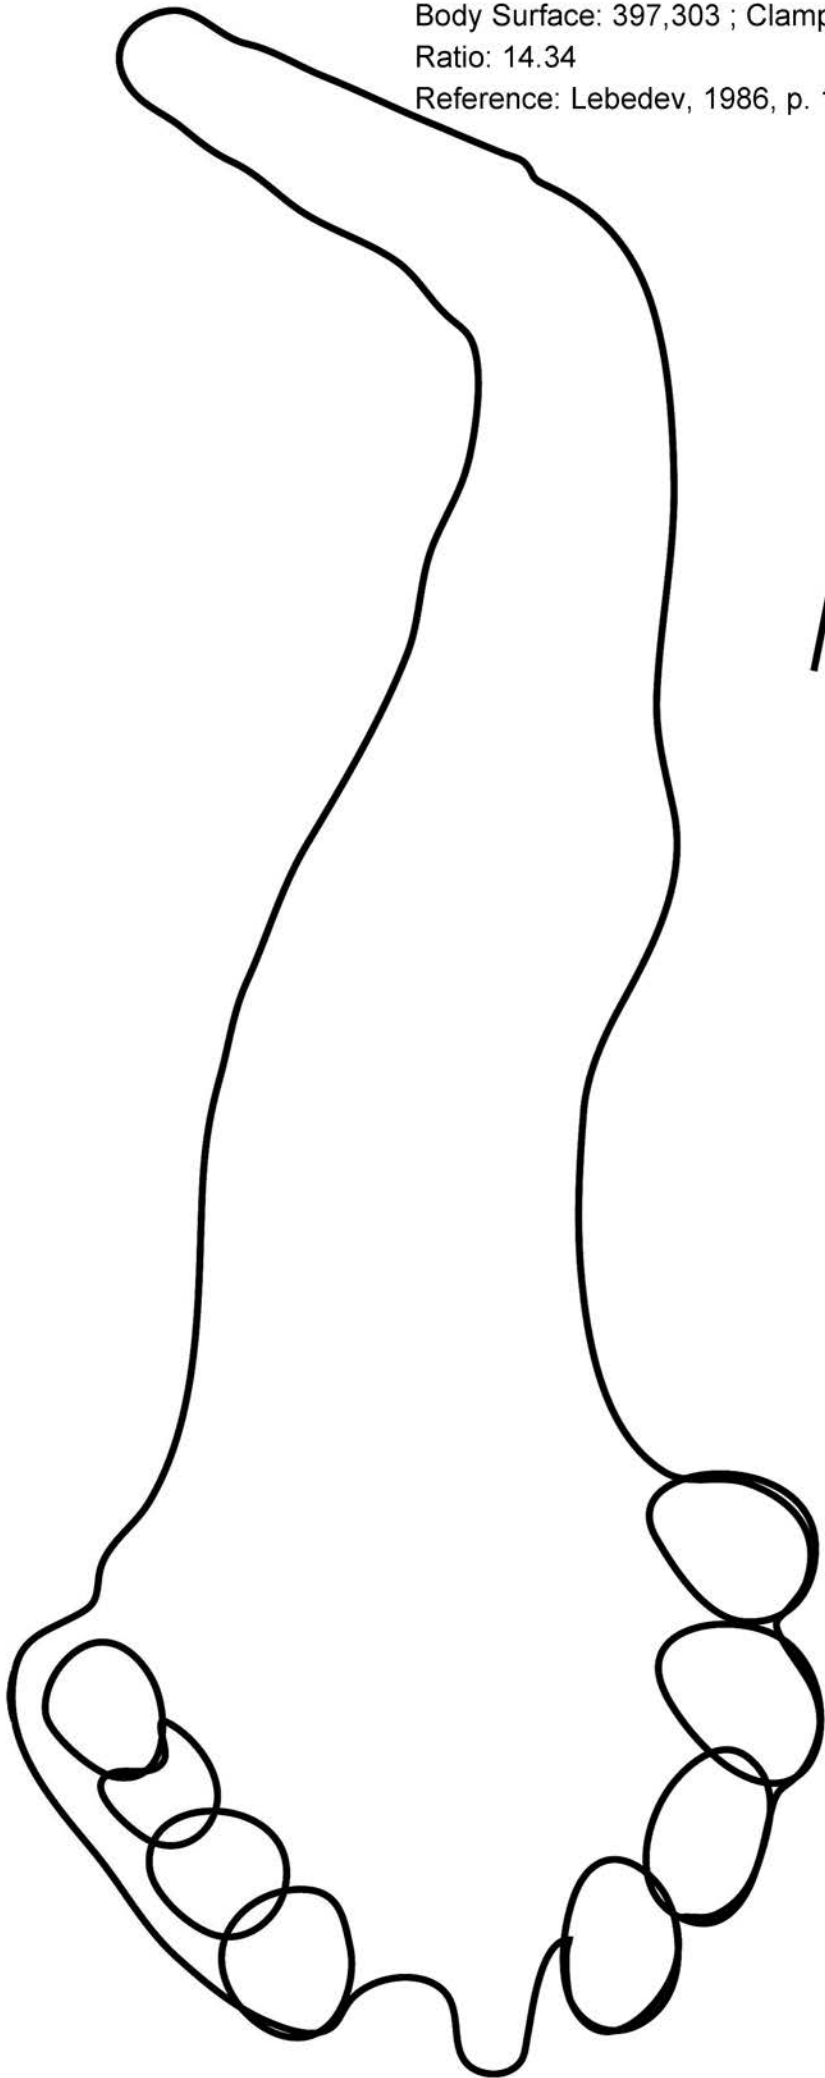

0.2 mm

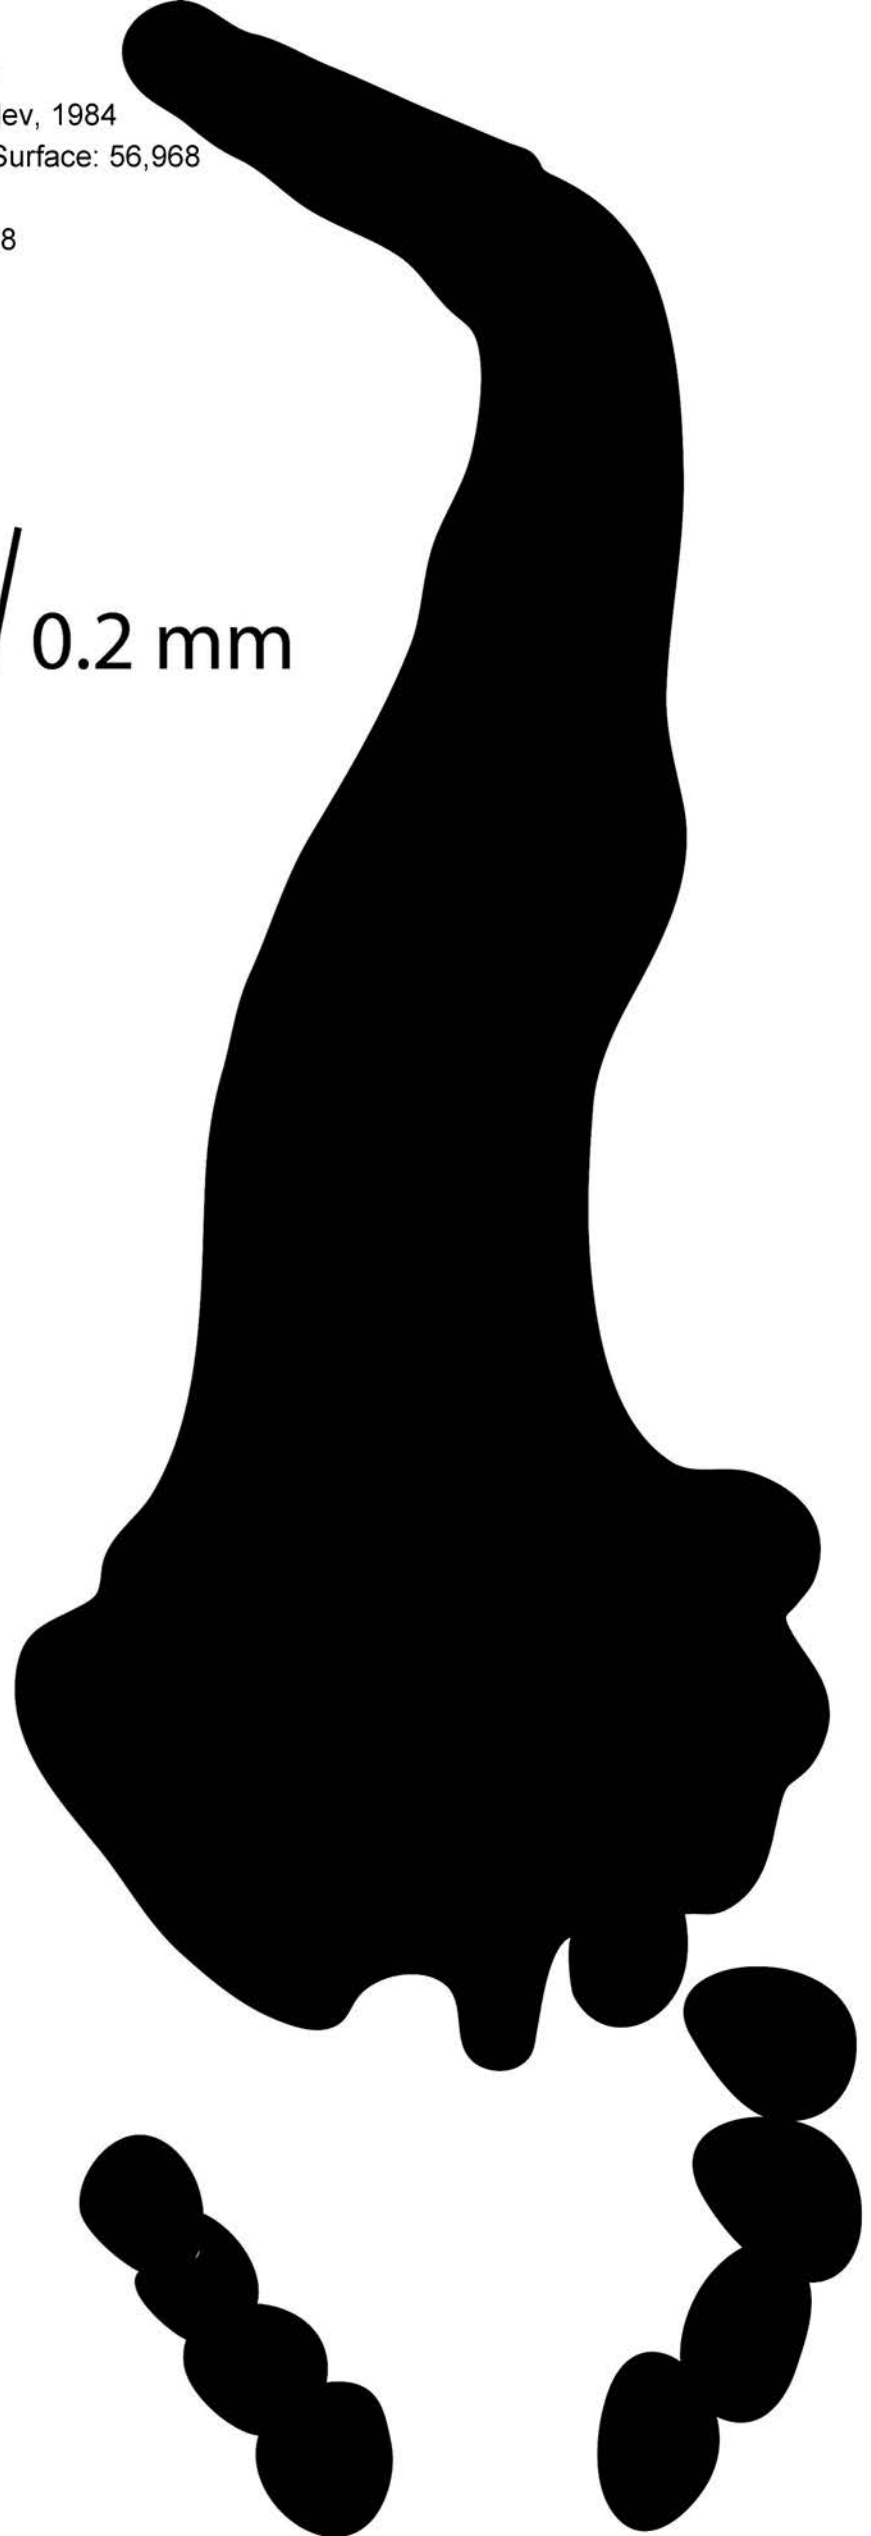

Family: Chauhaneidae  
Species: *Opisthogyne keralae* Unnithan, 1962  
Body Surface: 262,328  
Clamp Surface: 19,843  
Ratio: 7.56  
Reference: Unnithan, 1962, p. 318

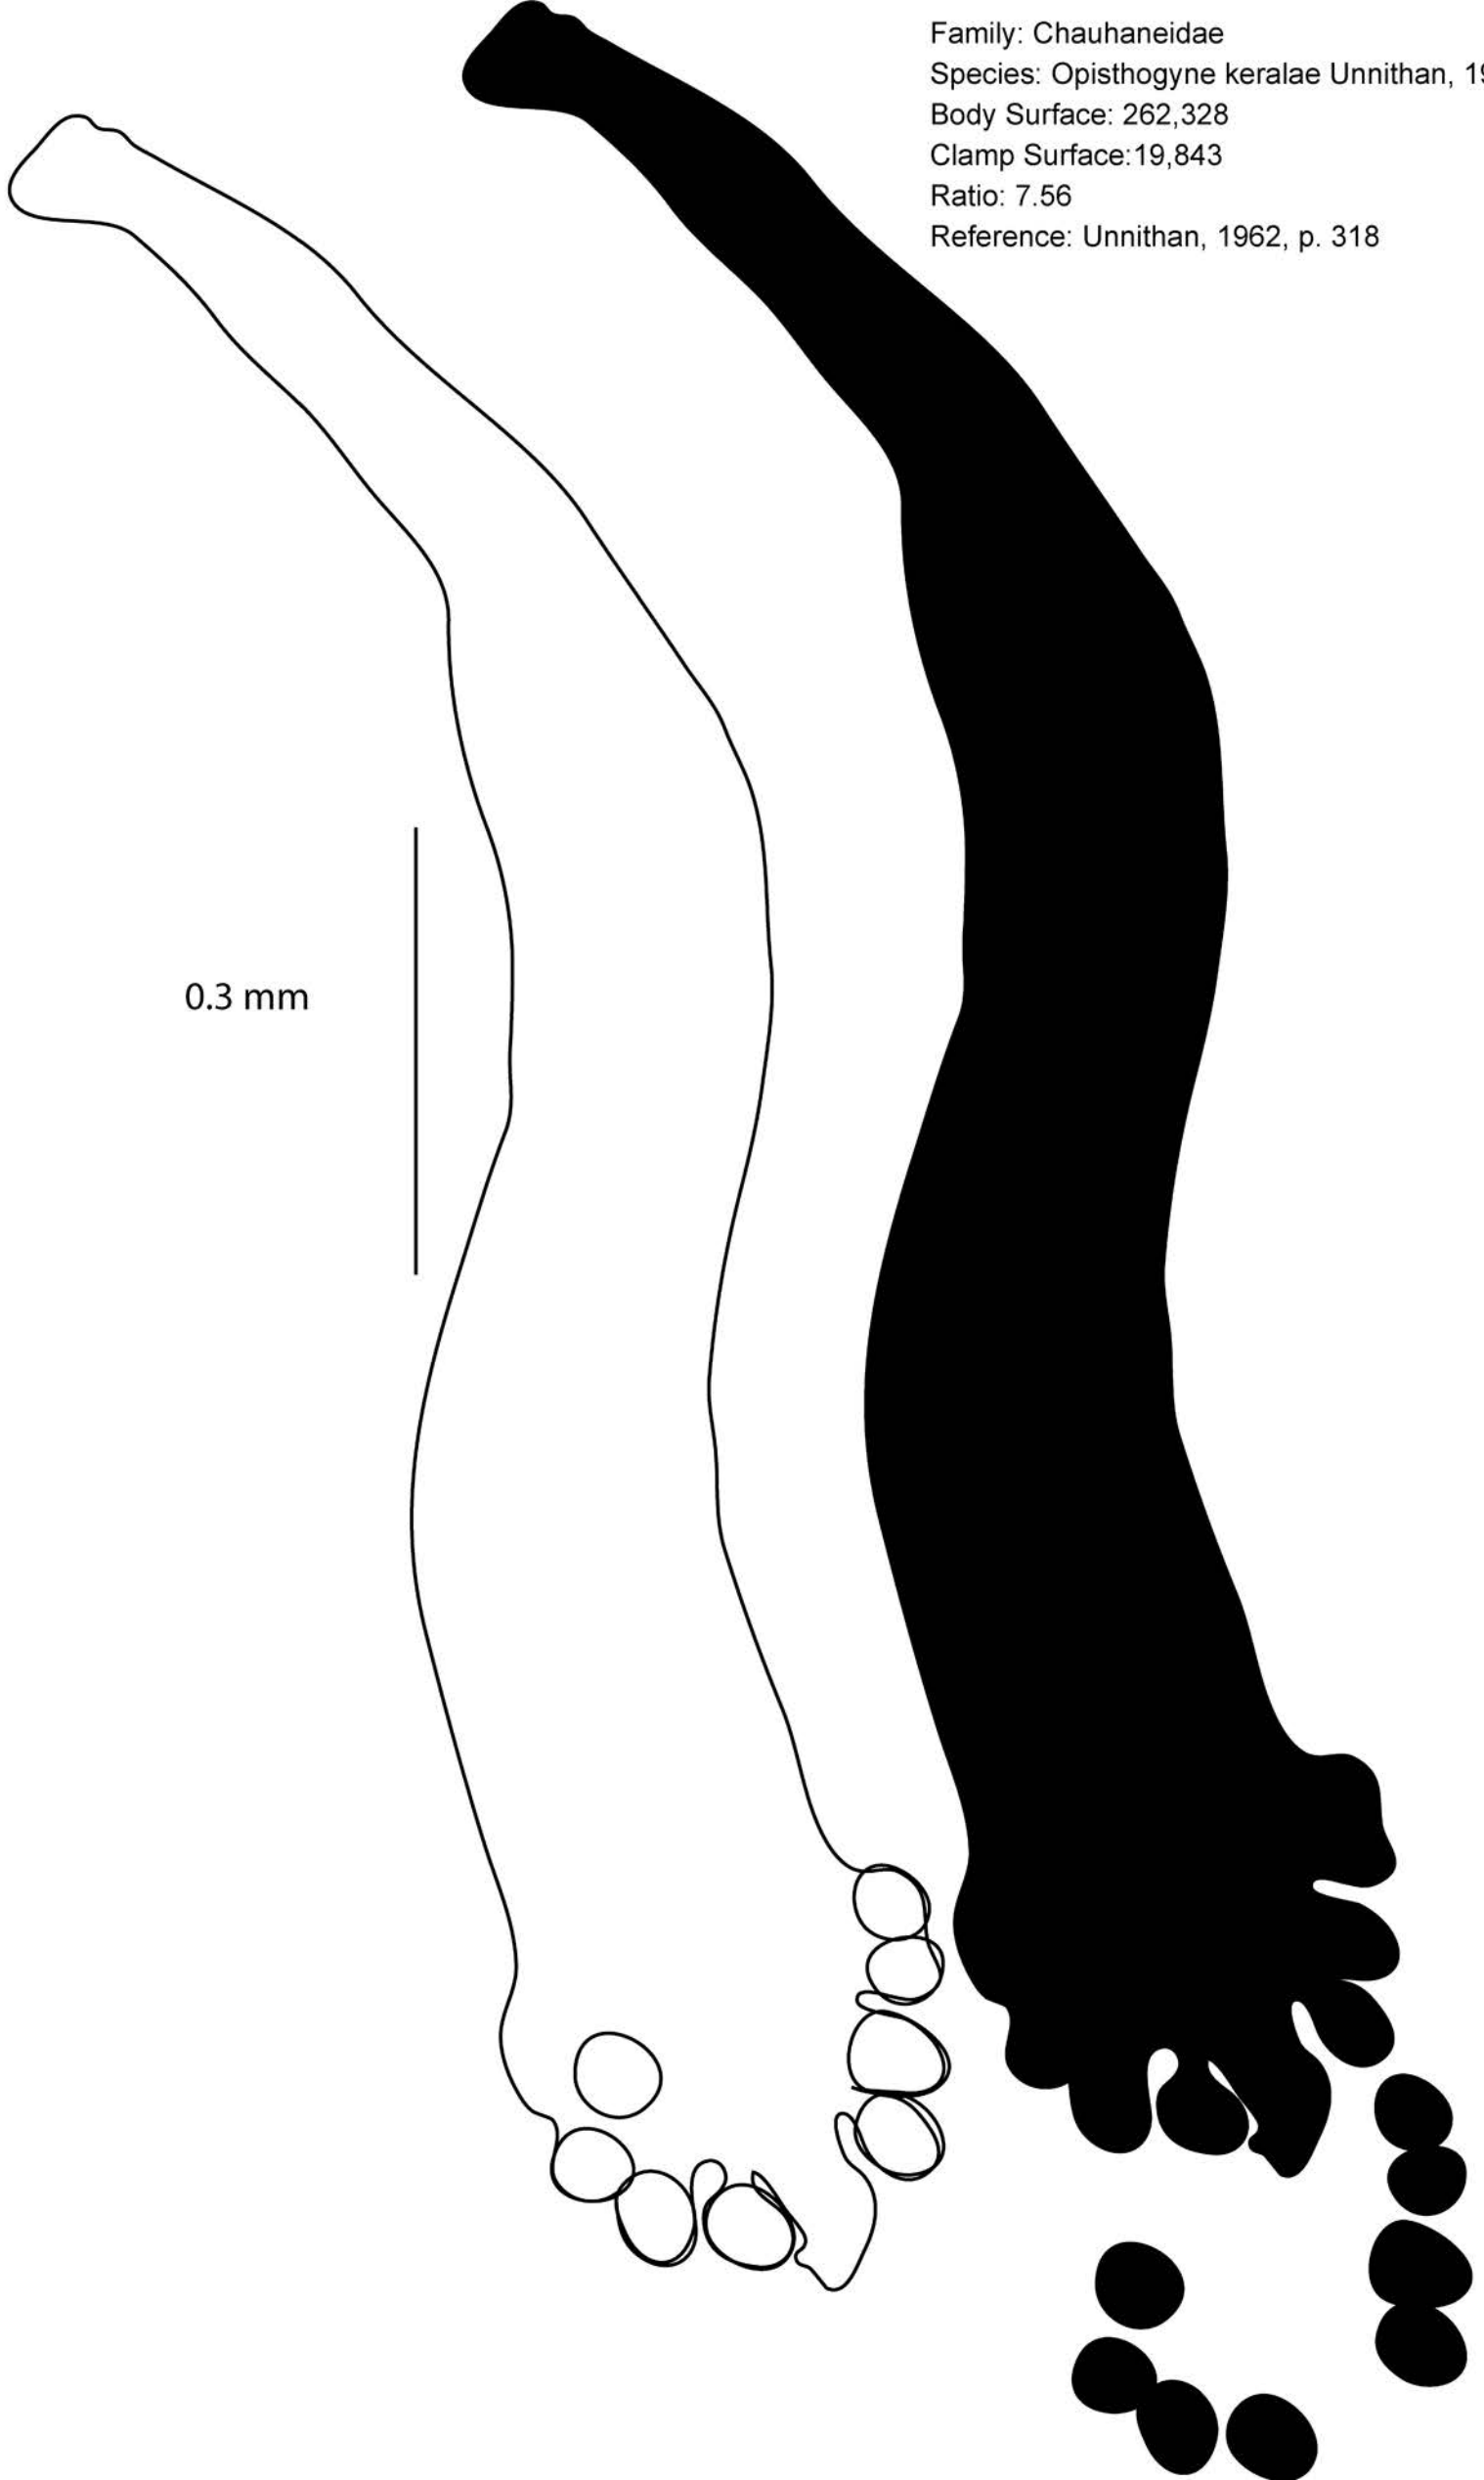

Family: Chauhaneidae

Species: *Paracaniongiella brinkmanni* (Unnithan, 1962) Lebedev, 1976

Body Surface: 236,647

Clamp Surface: 8,027

Ratio: 3.39

Reference: Pandey, 2008, p. 359

0.3 mm

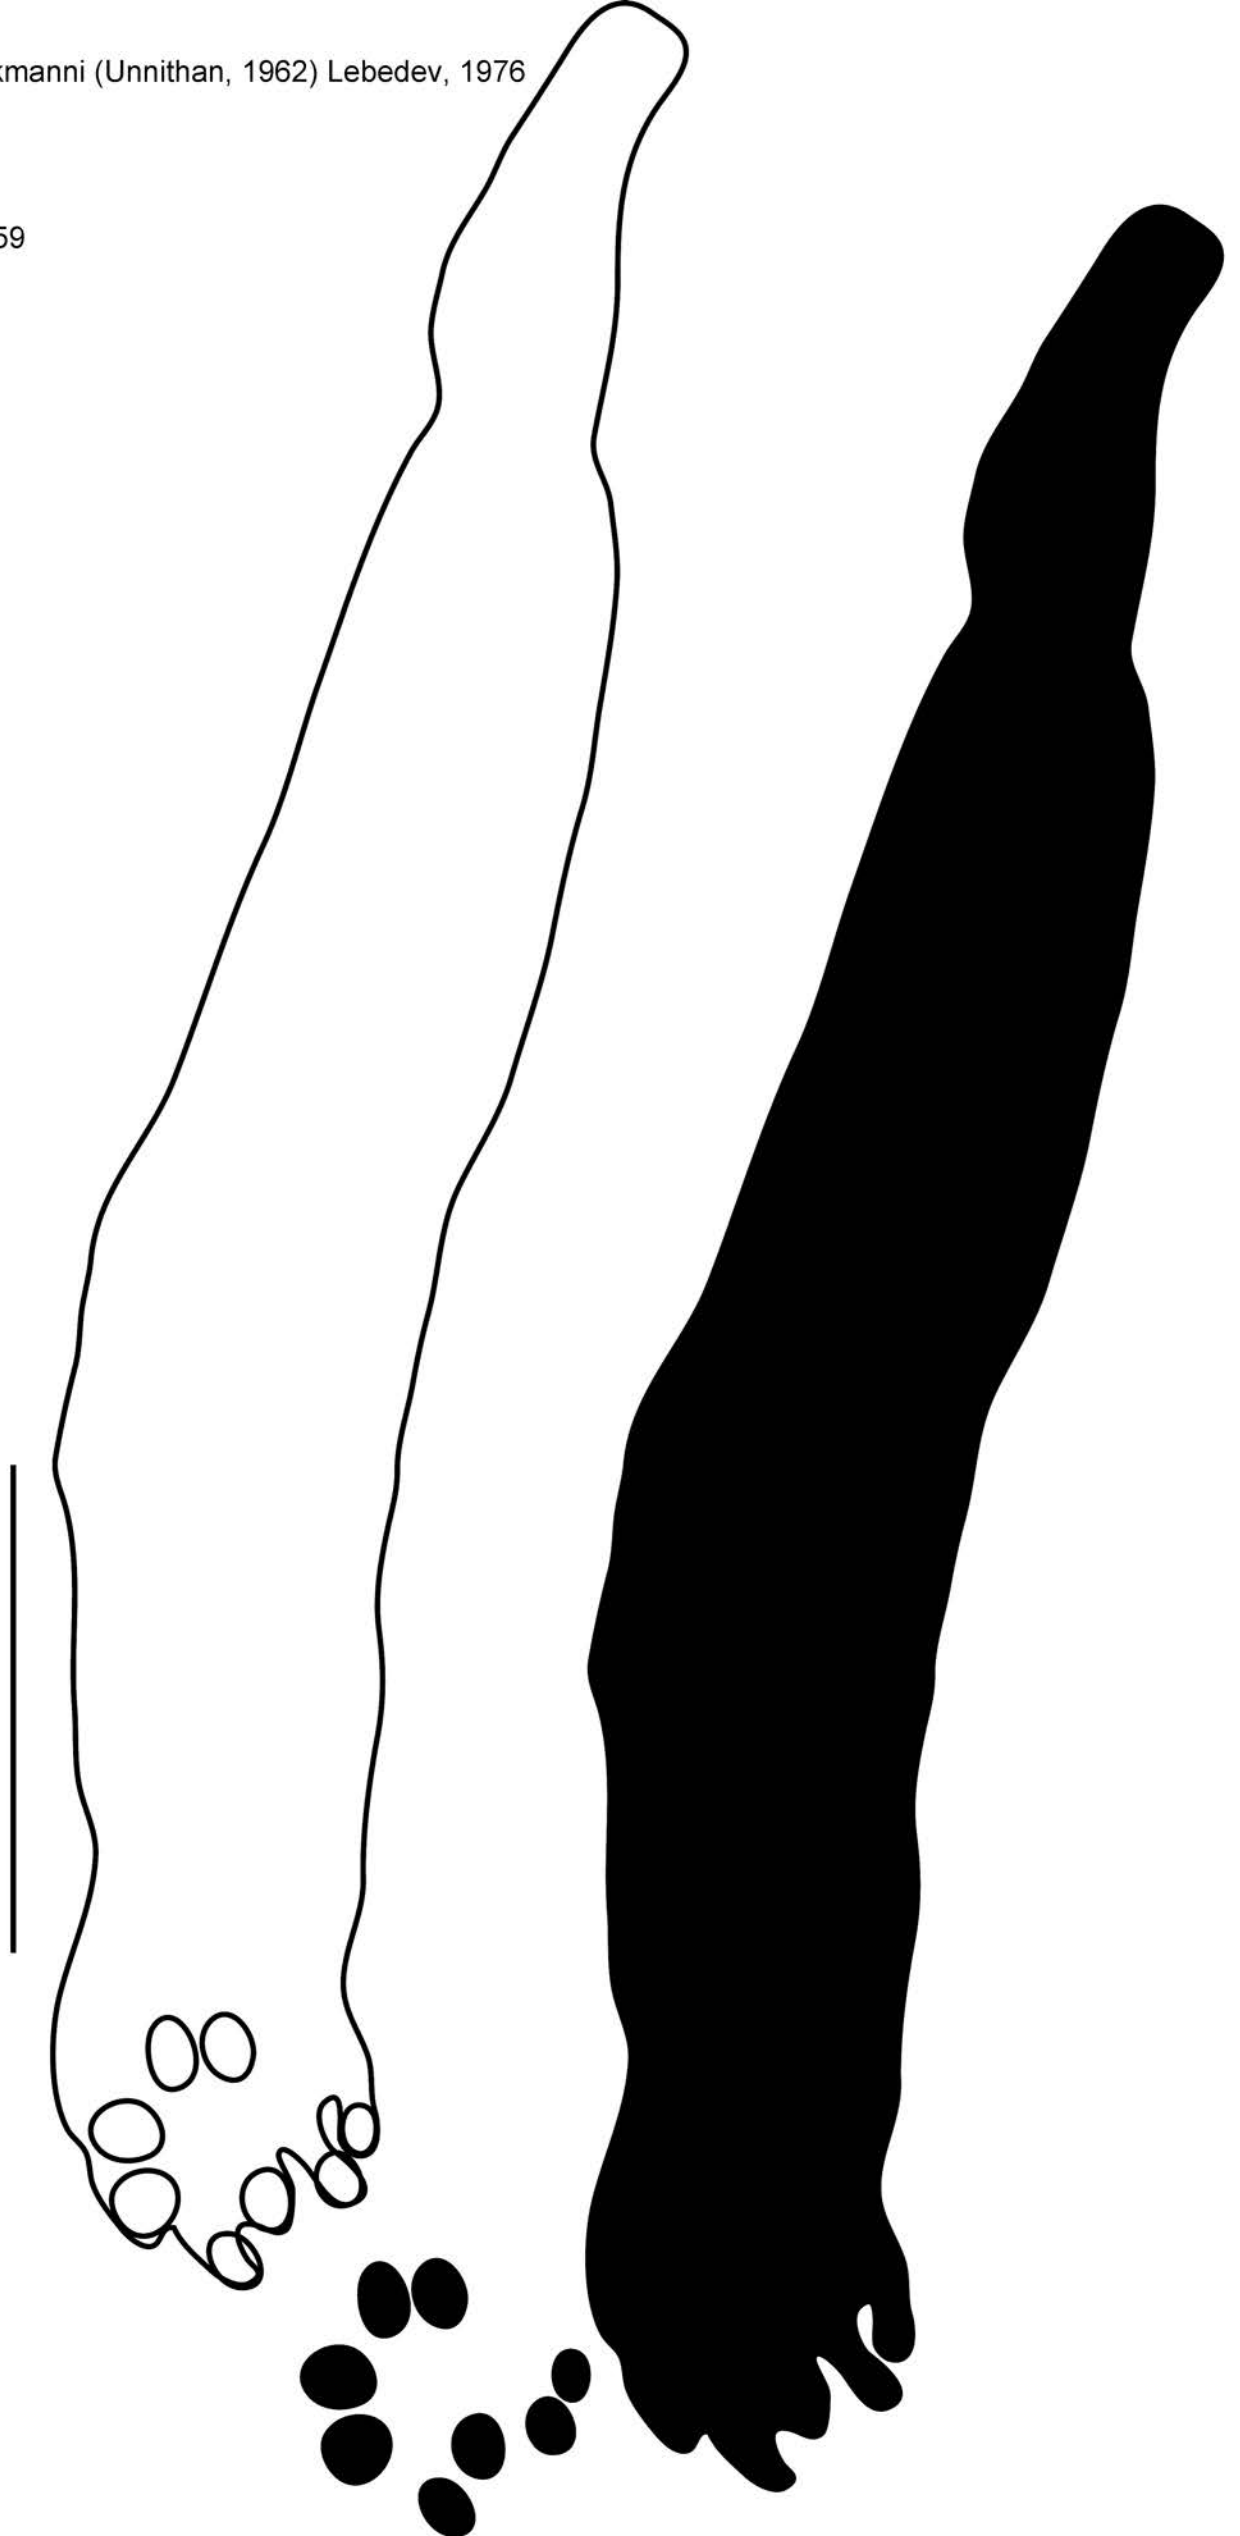

Chauhaneidae

*Paragemmaecaputia crassicauda*

Ramalingam, 1960

Body Surface: 189,399

Clamp Surface: 9,836; Ratio: 5.19

Reference: Pandey, 2008, p. 357

0.2 mm

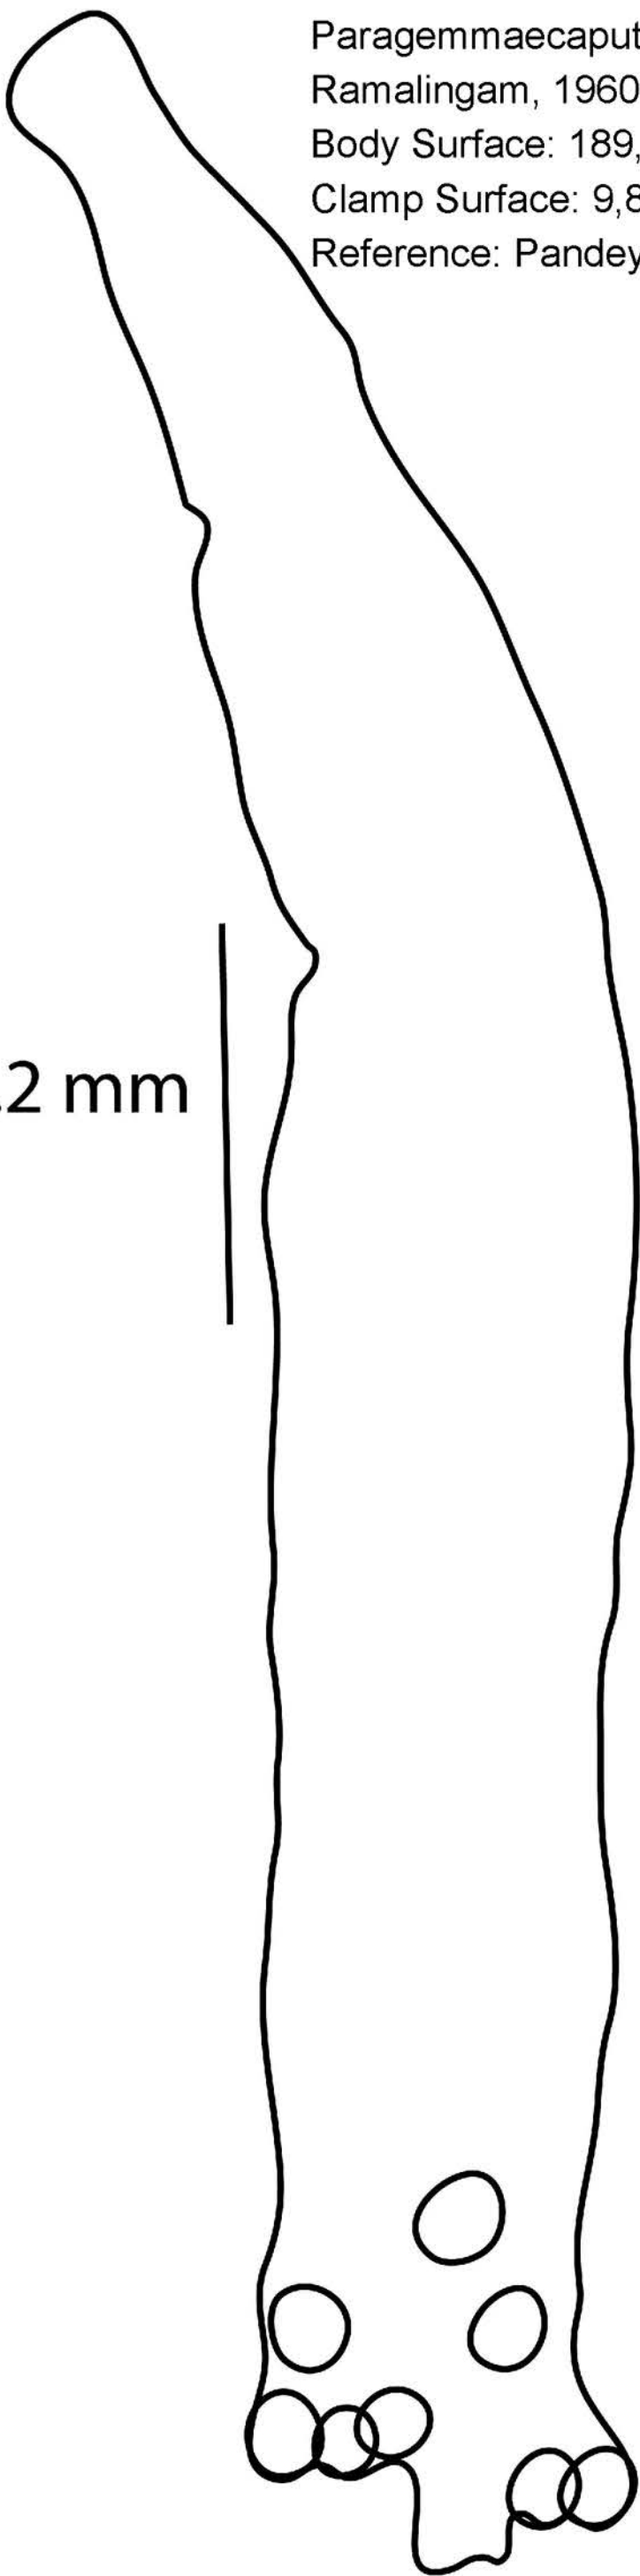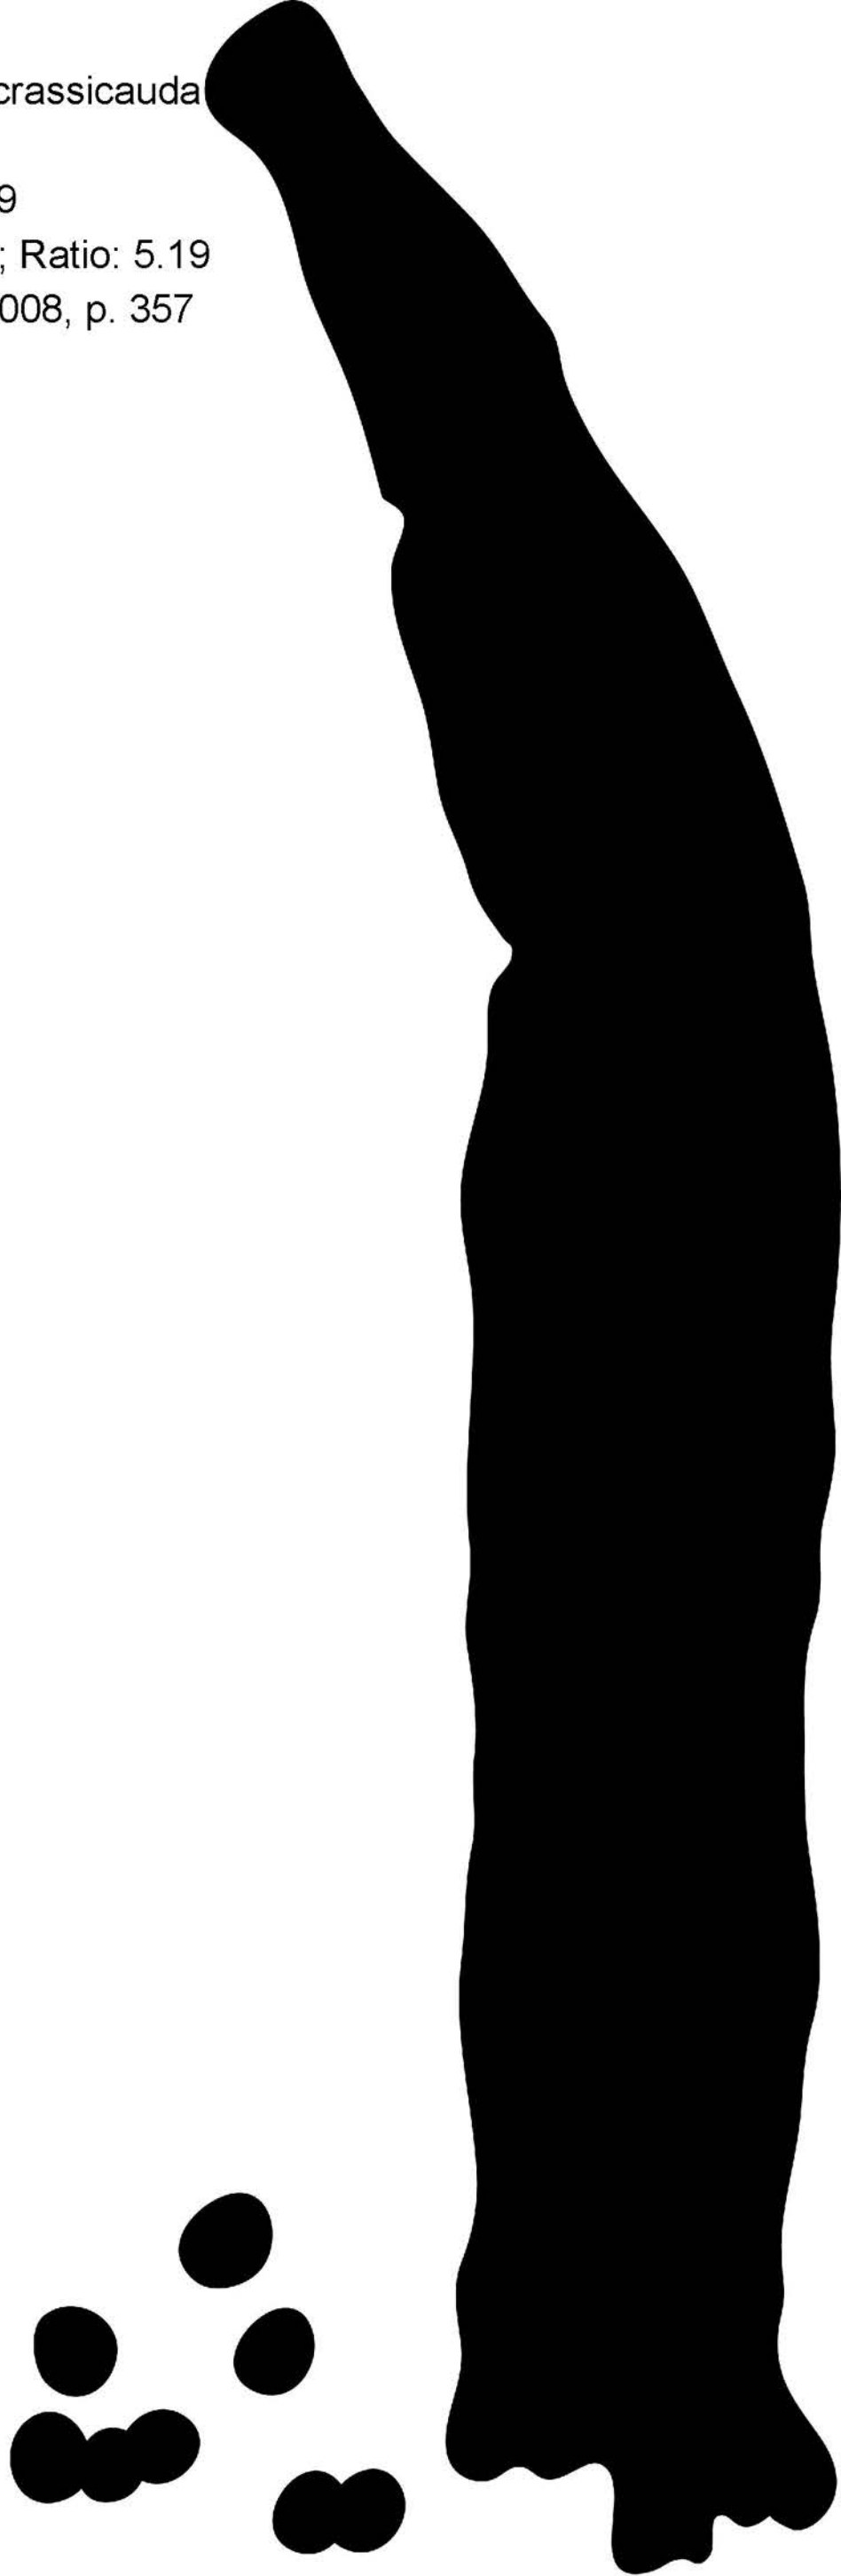

Family: Chauhaneidae  
Species: *Pentatres sphyraenae*  
Euzet & Razarihelisoa, 1959  
Body Surface: 497,849  
Clamp Surface: 29,309  
Ratio: 5.89  
reference: Lebedev, 1986, p. 132

0.2 mm

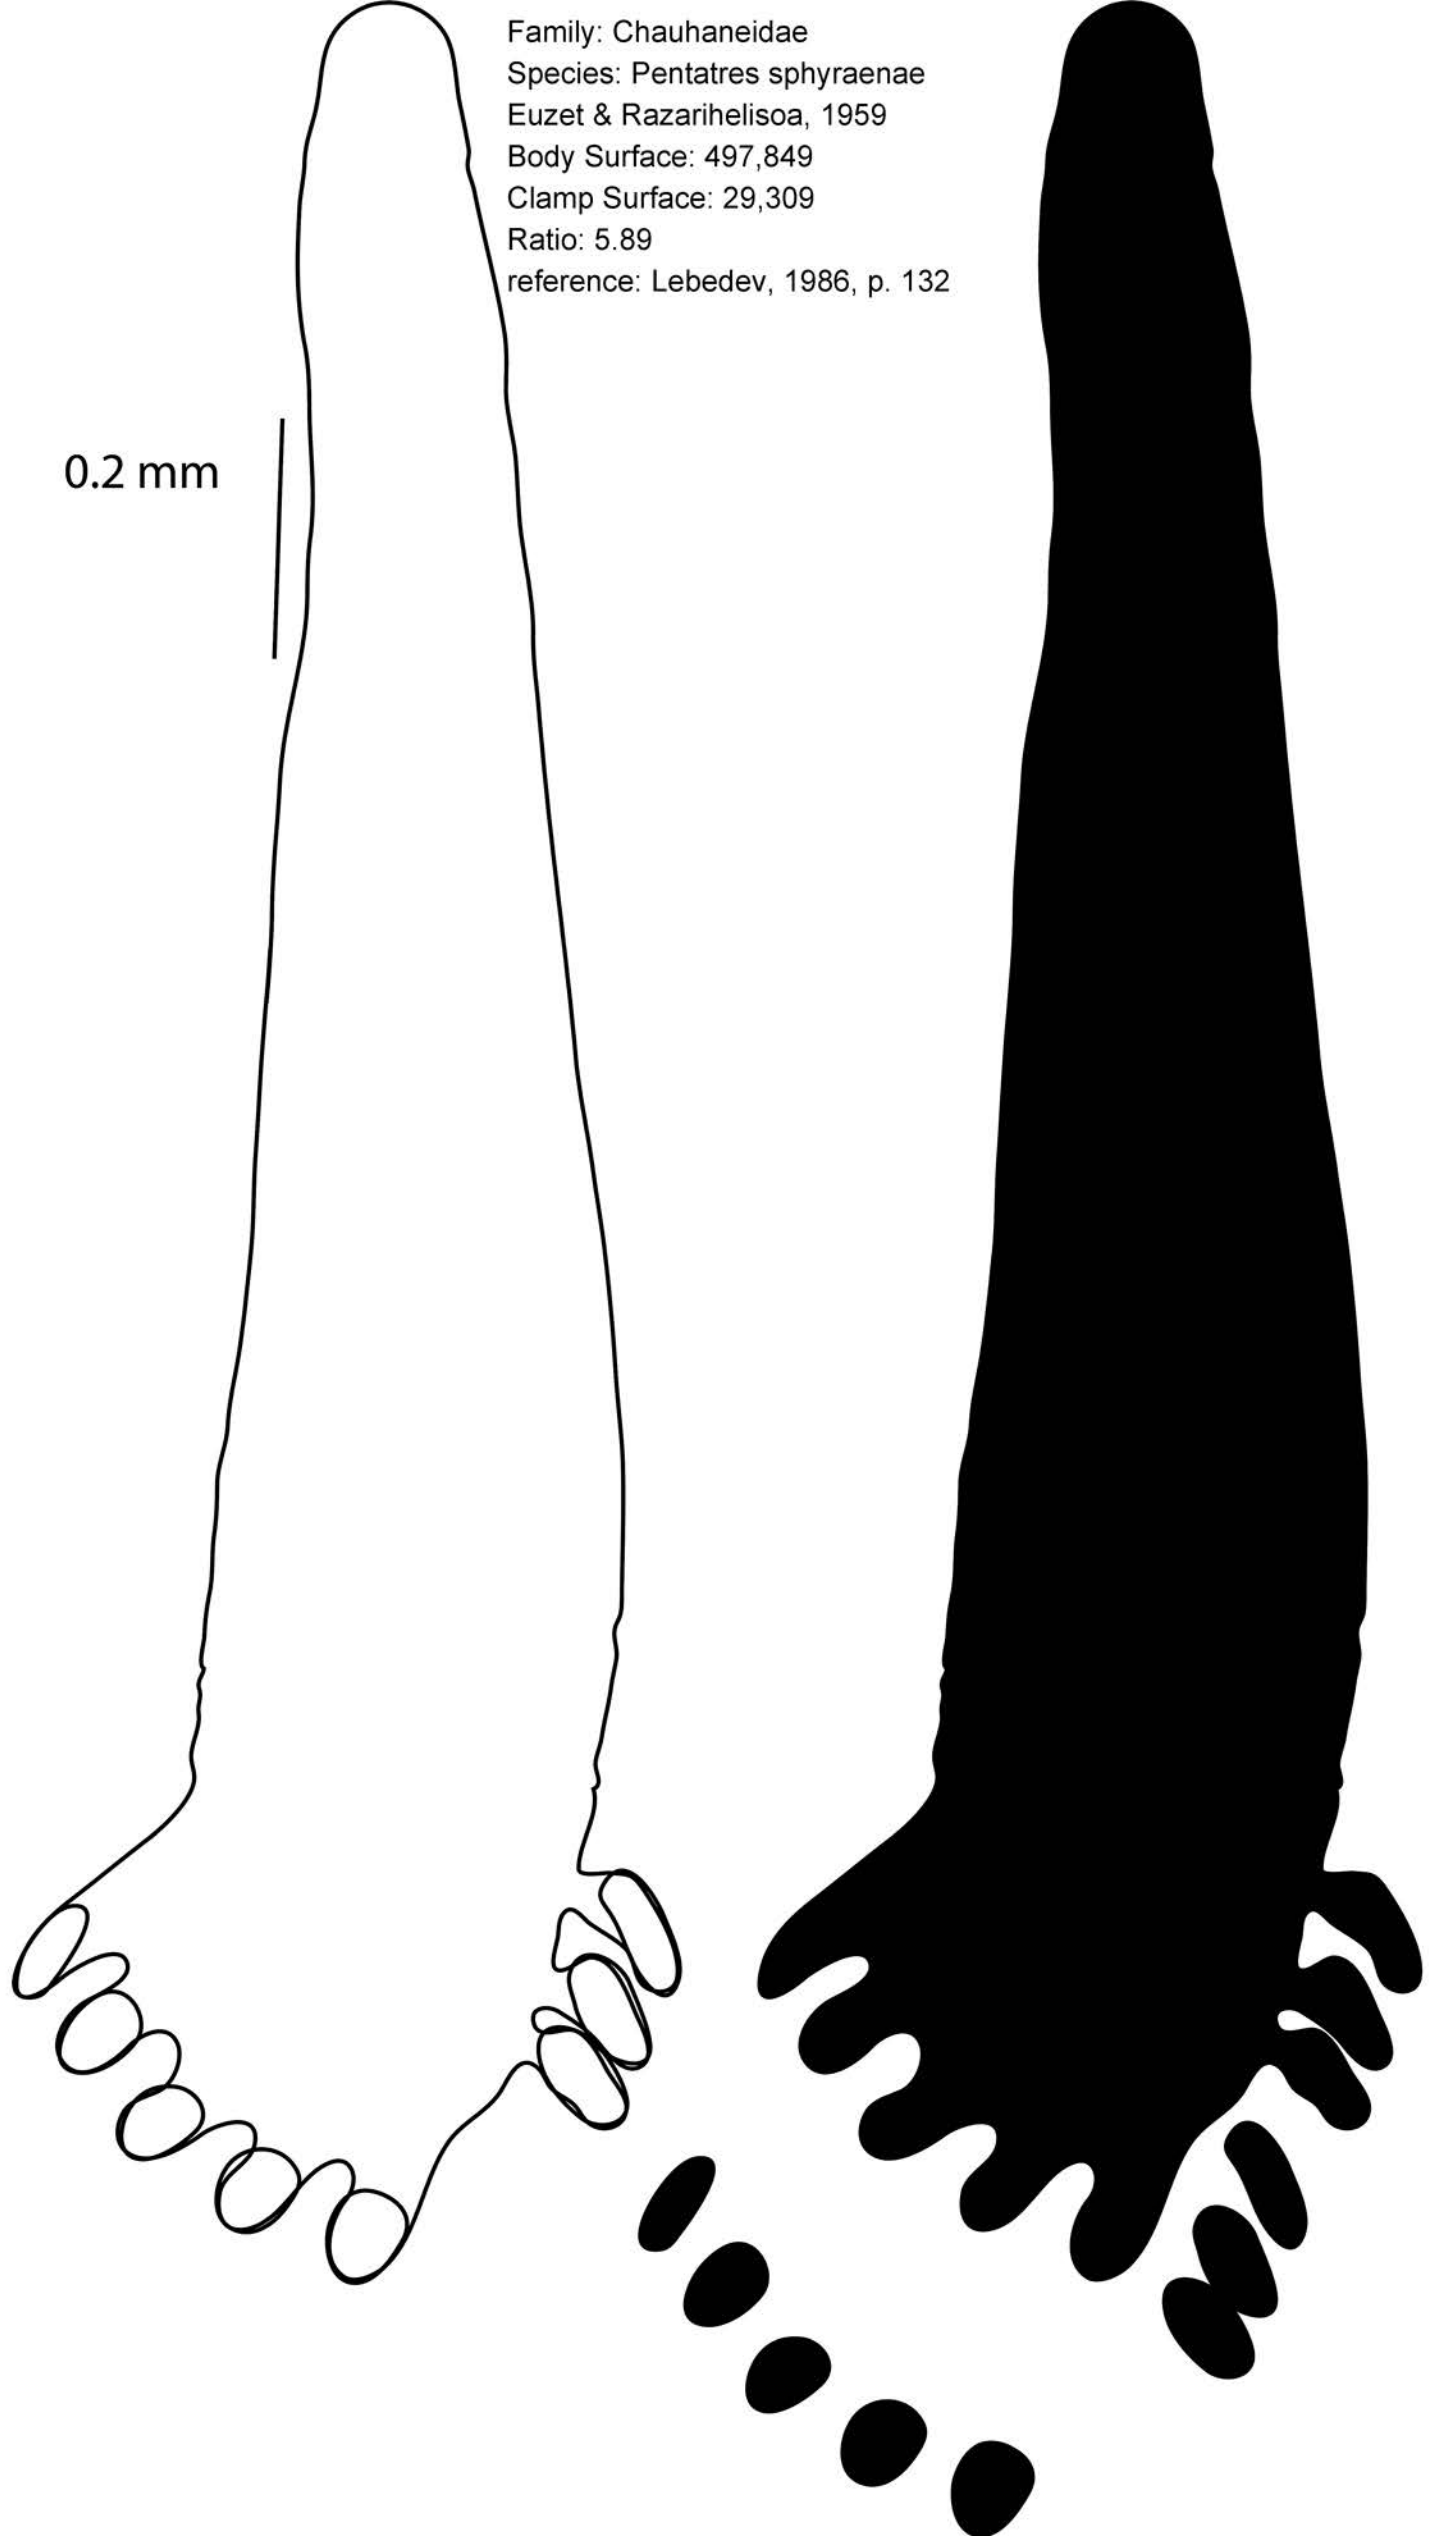

Family: Chauhaneidae

Species: *Pseudochauhanea elongata* Kritsky, Bilqees & Leiby, 1972

Body Surface: 593,000

Clamp Surface: 16,000

Ratio: 2.70

Reference: Lebedev, 1986, p. 122

Note: scale erroneous, should be 0.1 mm

0.01 mm

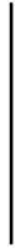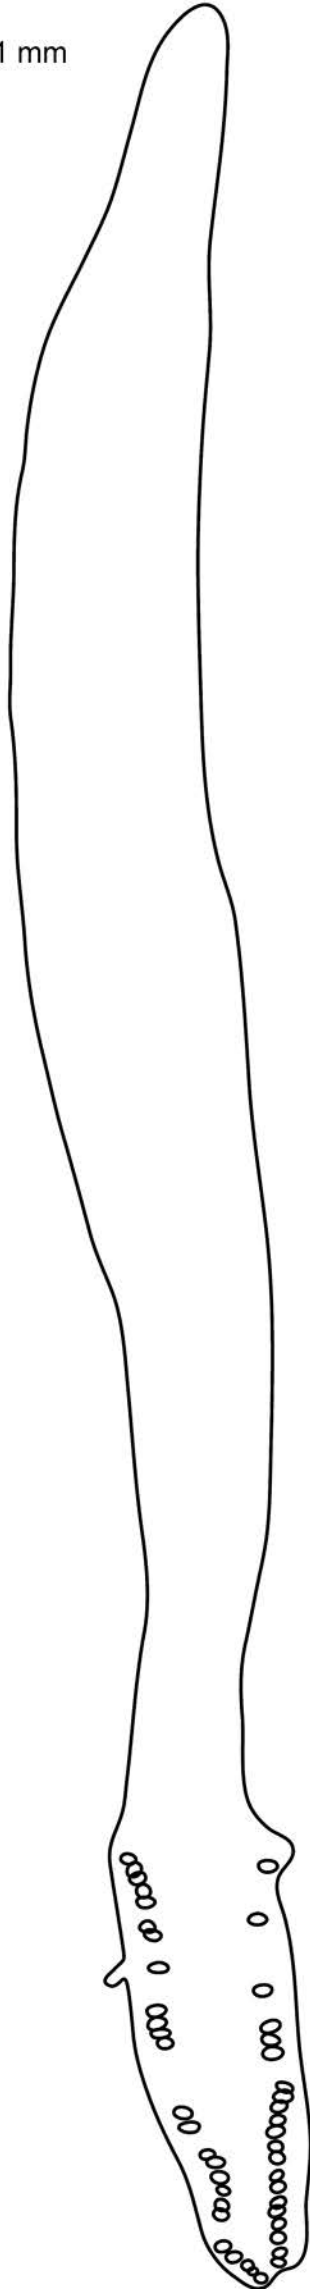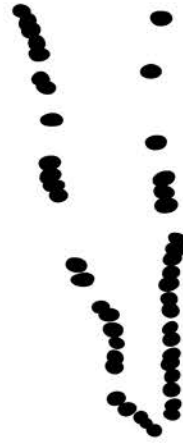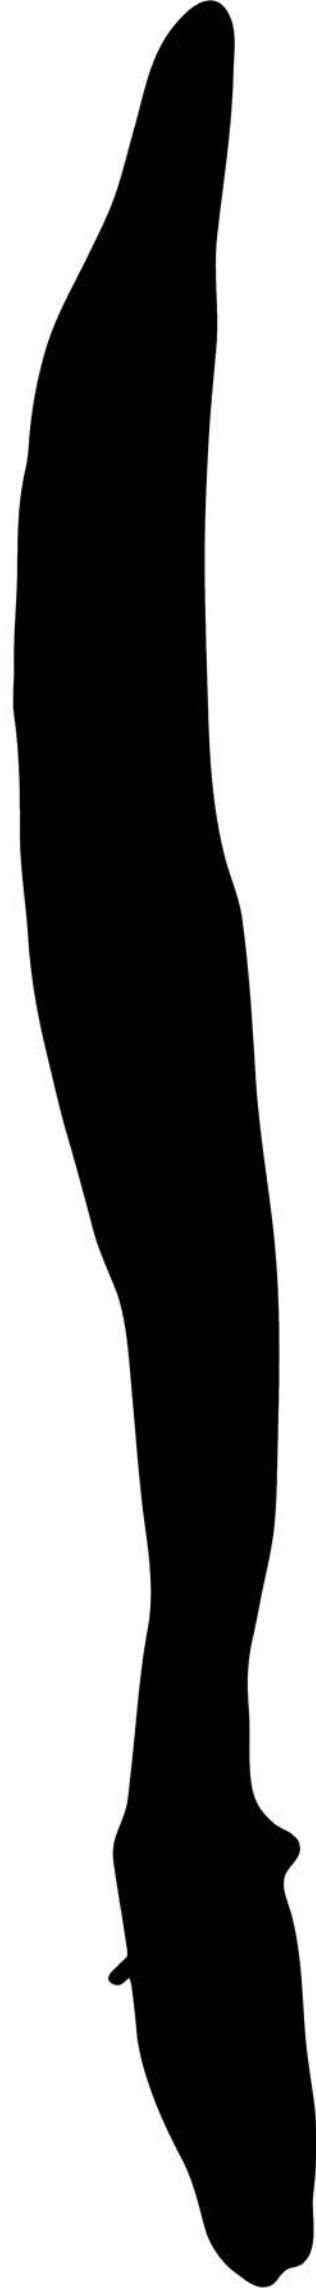

Chauhaneidae

*Pseudochauhanea macrorchis*

Lin, Liu & Zhang

in Zhang, Yang & Liu, 2001

Body Surface: 1,037,805

Clamp Surface: 41,361; Ratio:3.99

Reference: Zhang, 2001, p. 261

0.5 mm

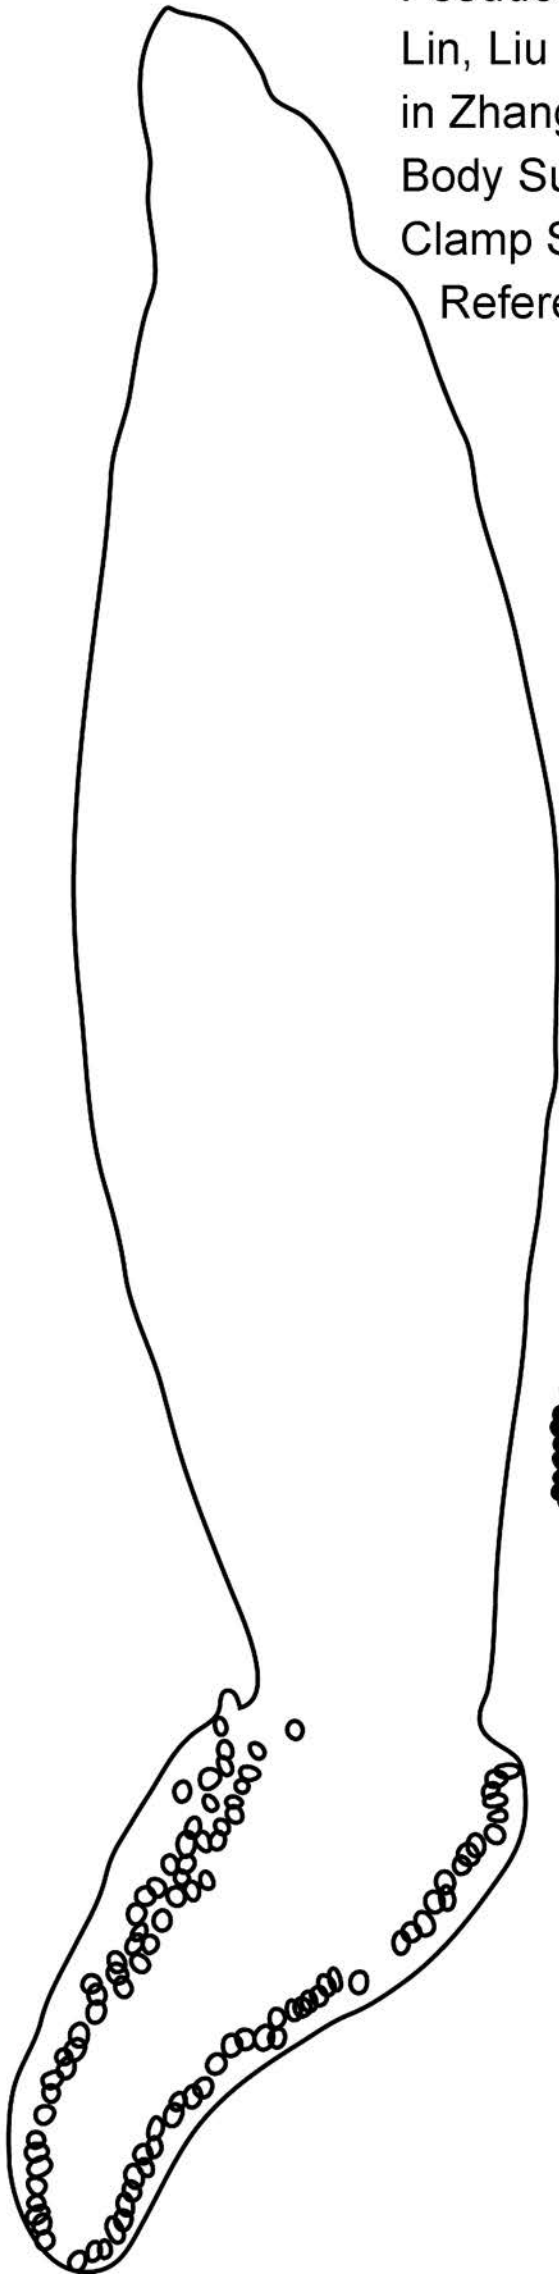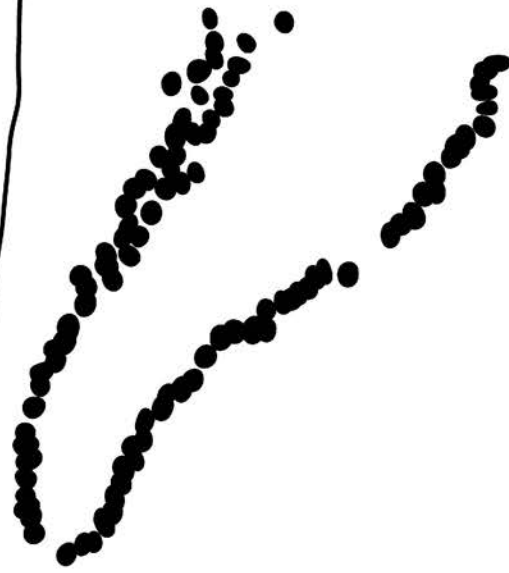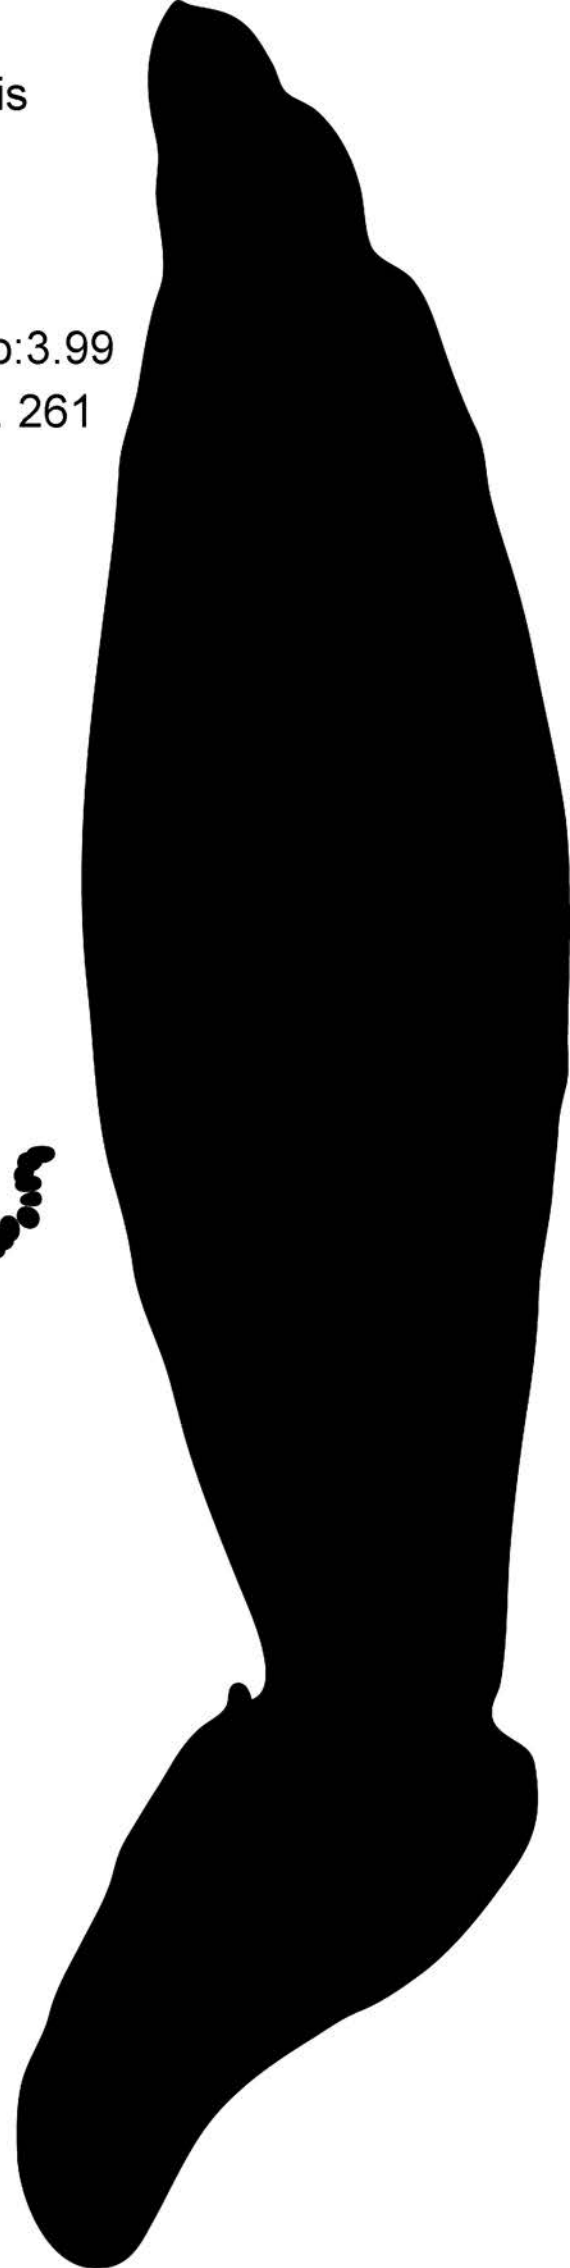

Family: Chauhaneidae

Species: *Pseudochauhanea mexicana* Lamothe, 1967

Body Surface: 2,354,237

Clamp Surface: 123,241

Ratio: 5.23

Reference: Lebedev, 1986, p. 120

0.3 mm

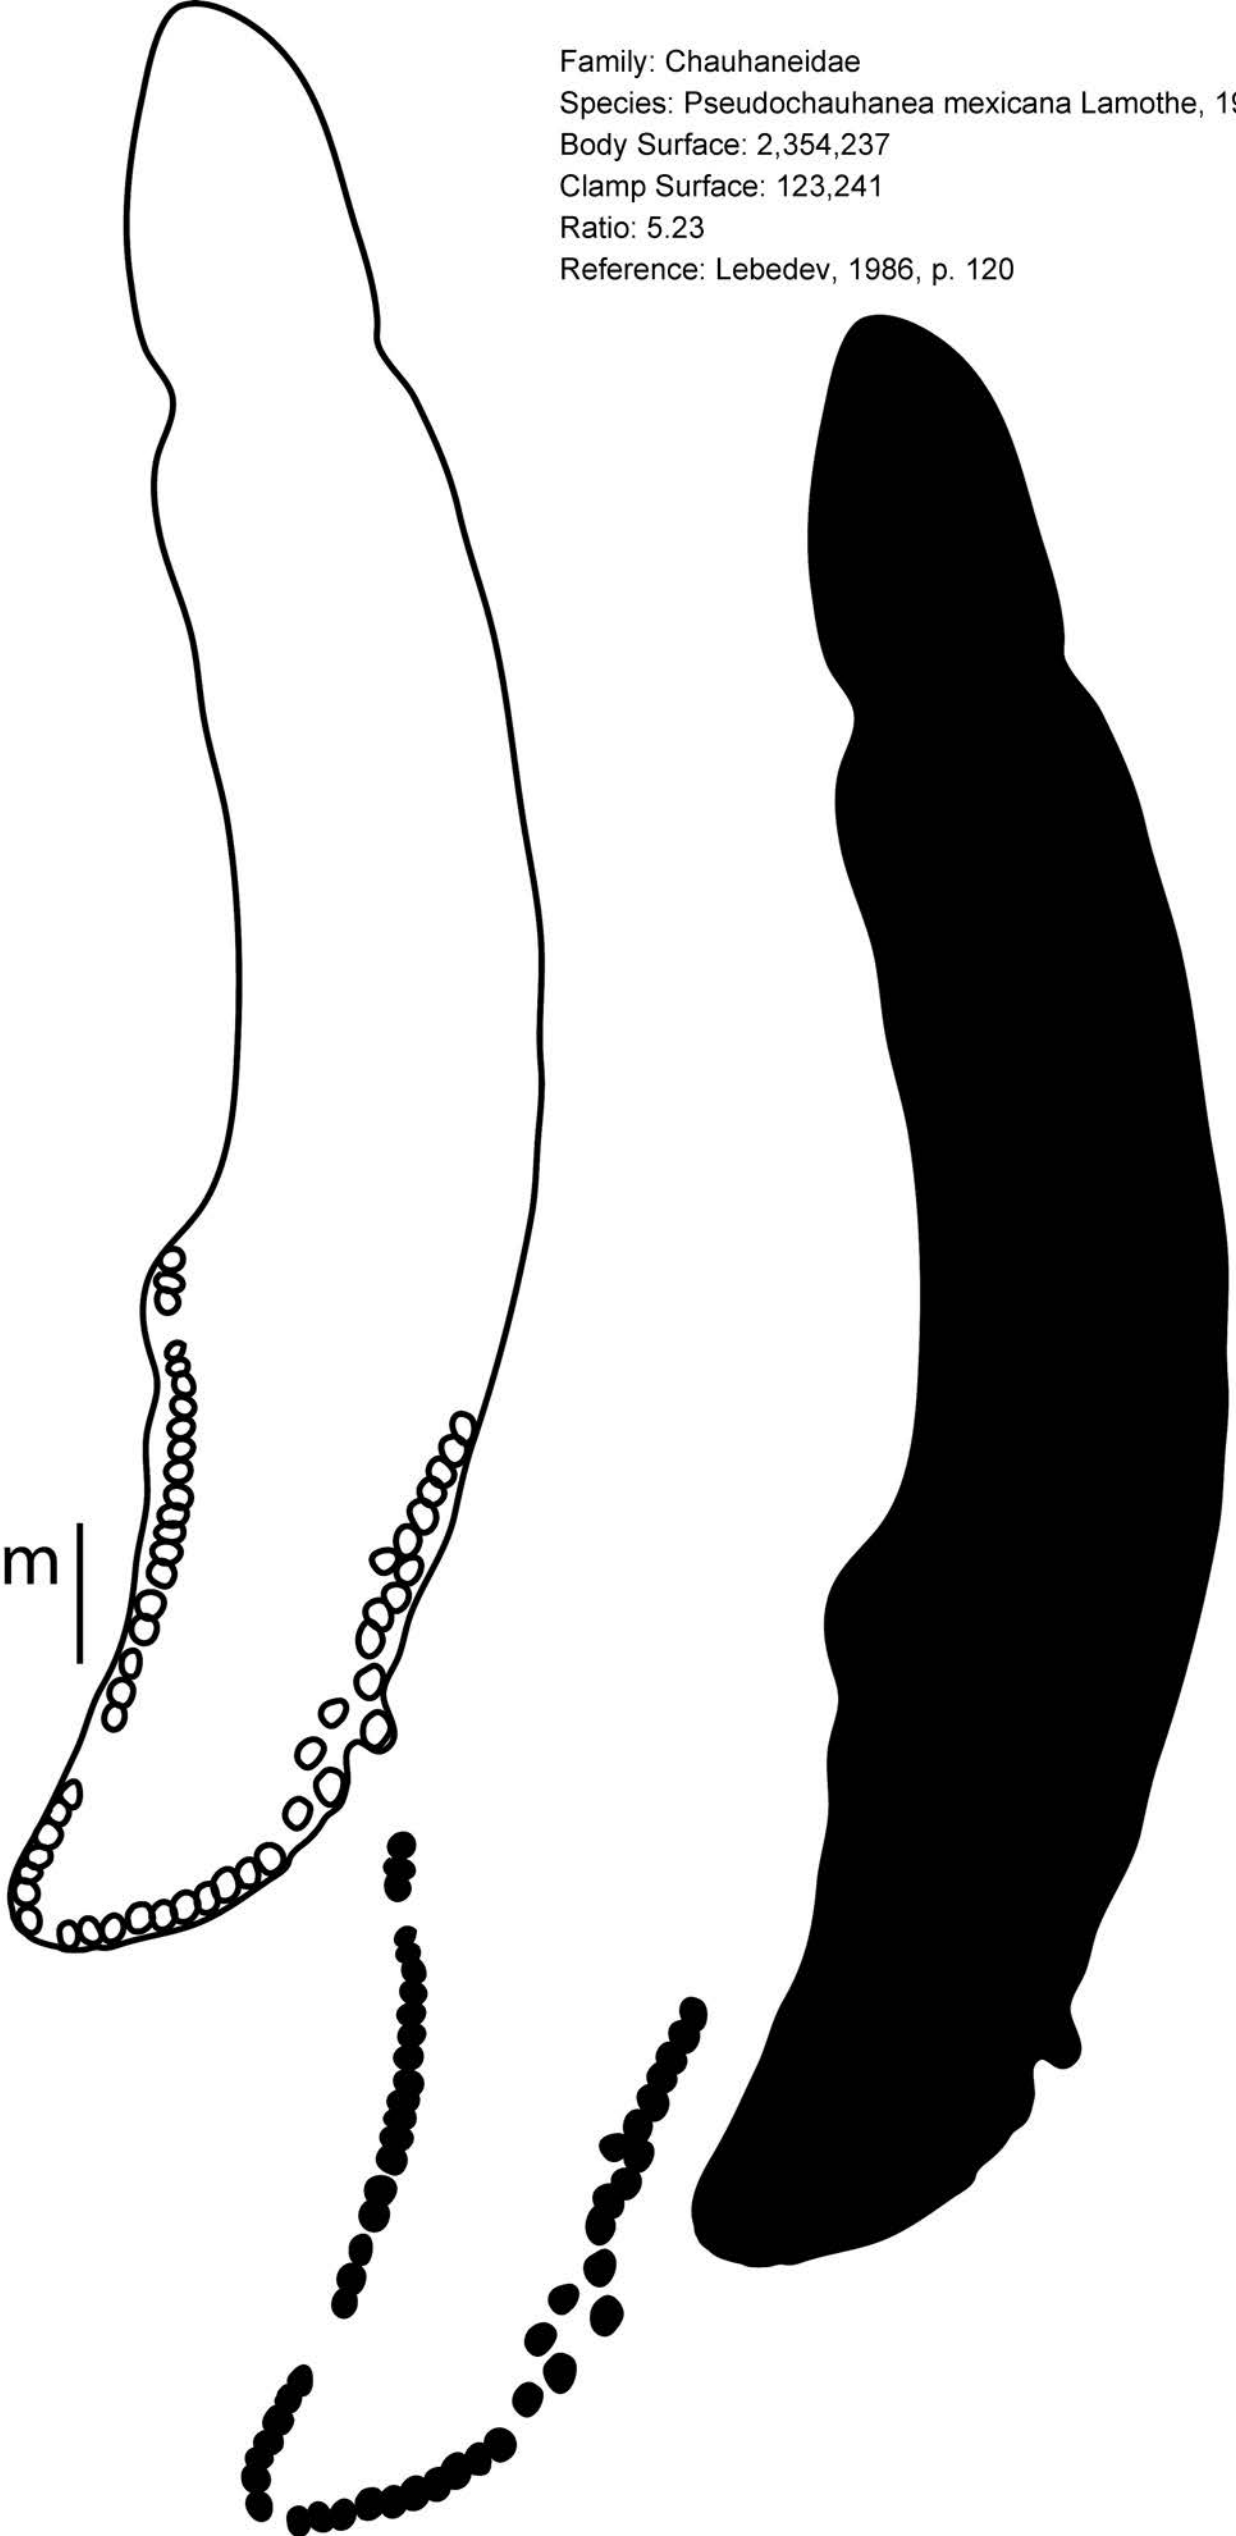



Chauhaneidae  
*Pseudochauhanea sphyraenae* Yamaguti, 1965  
Body Surface: 2,795,654  
Clamp Surface: 110,955  
Ratio: 3.97  
Reference: Yamaguti, 1968, p. 251

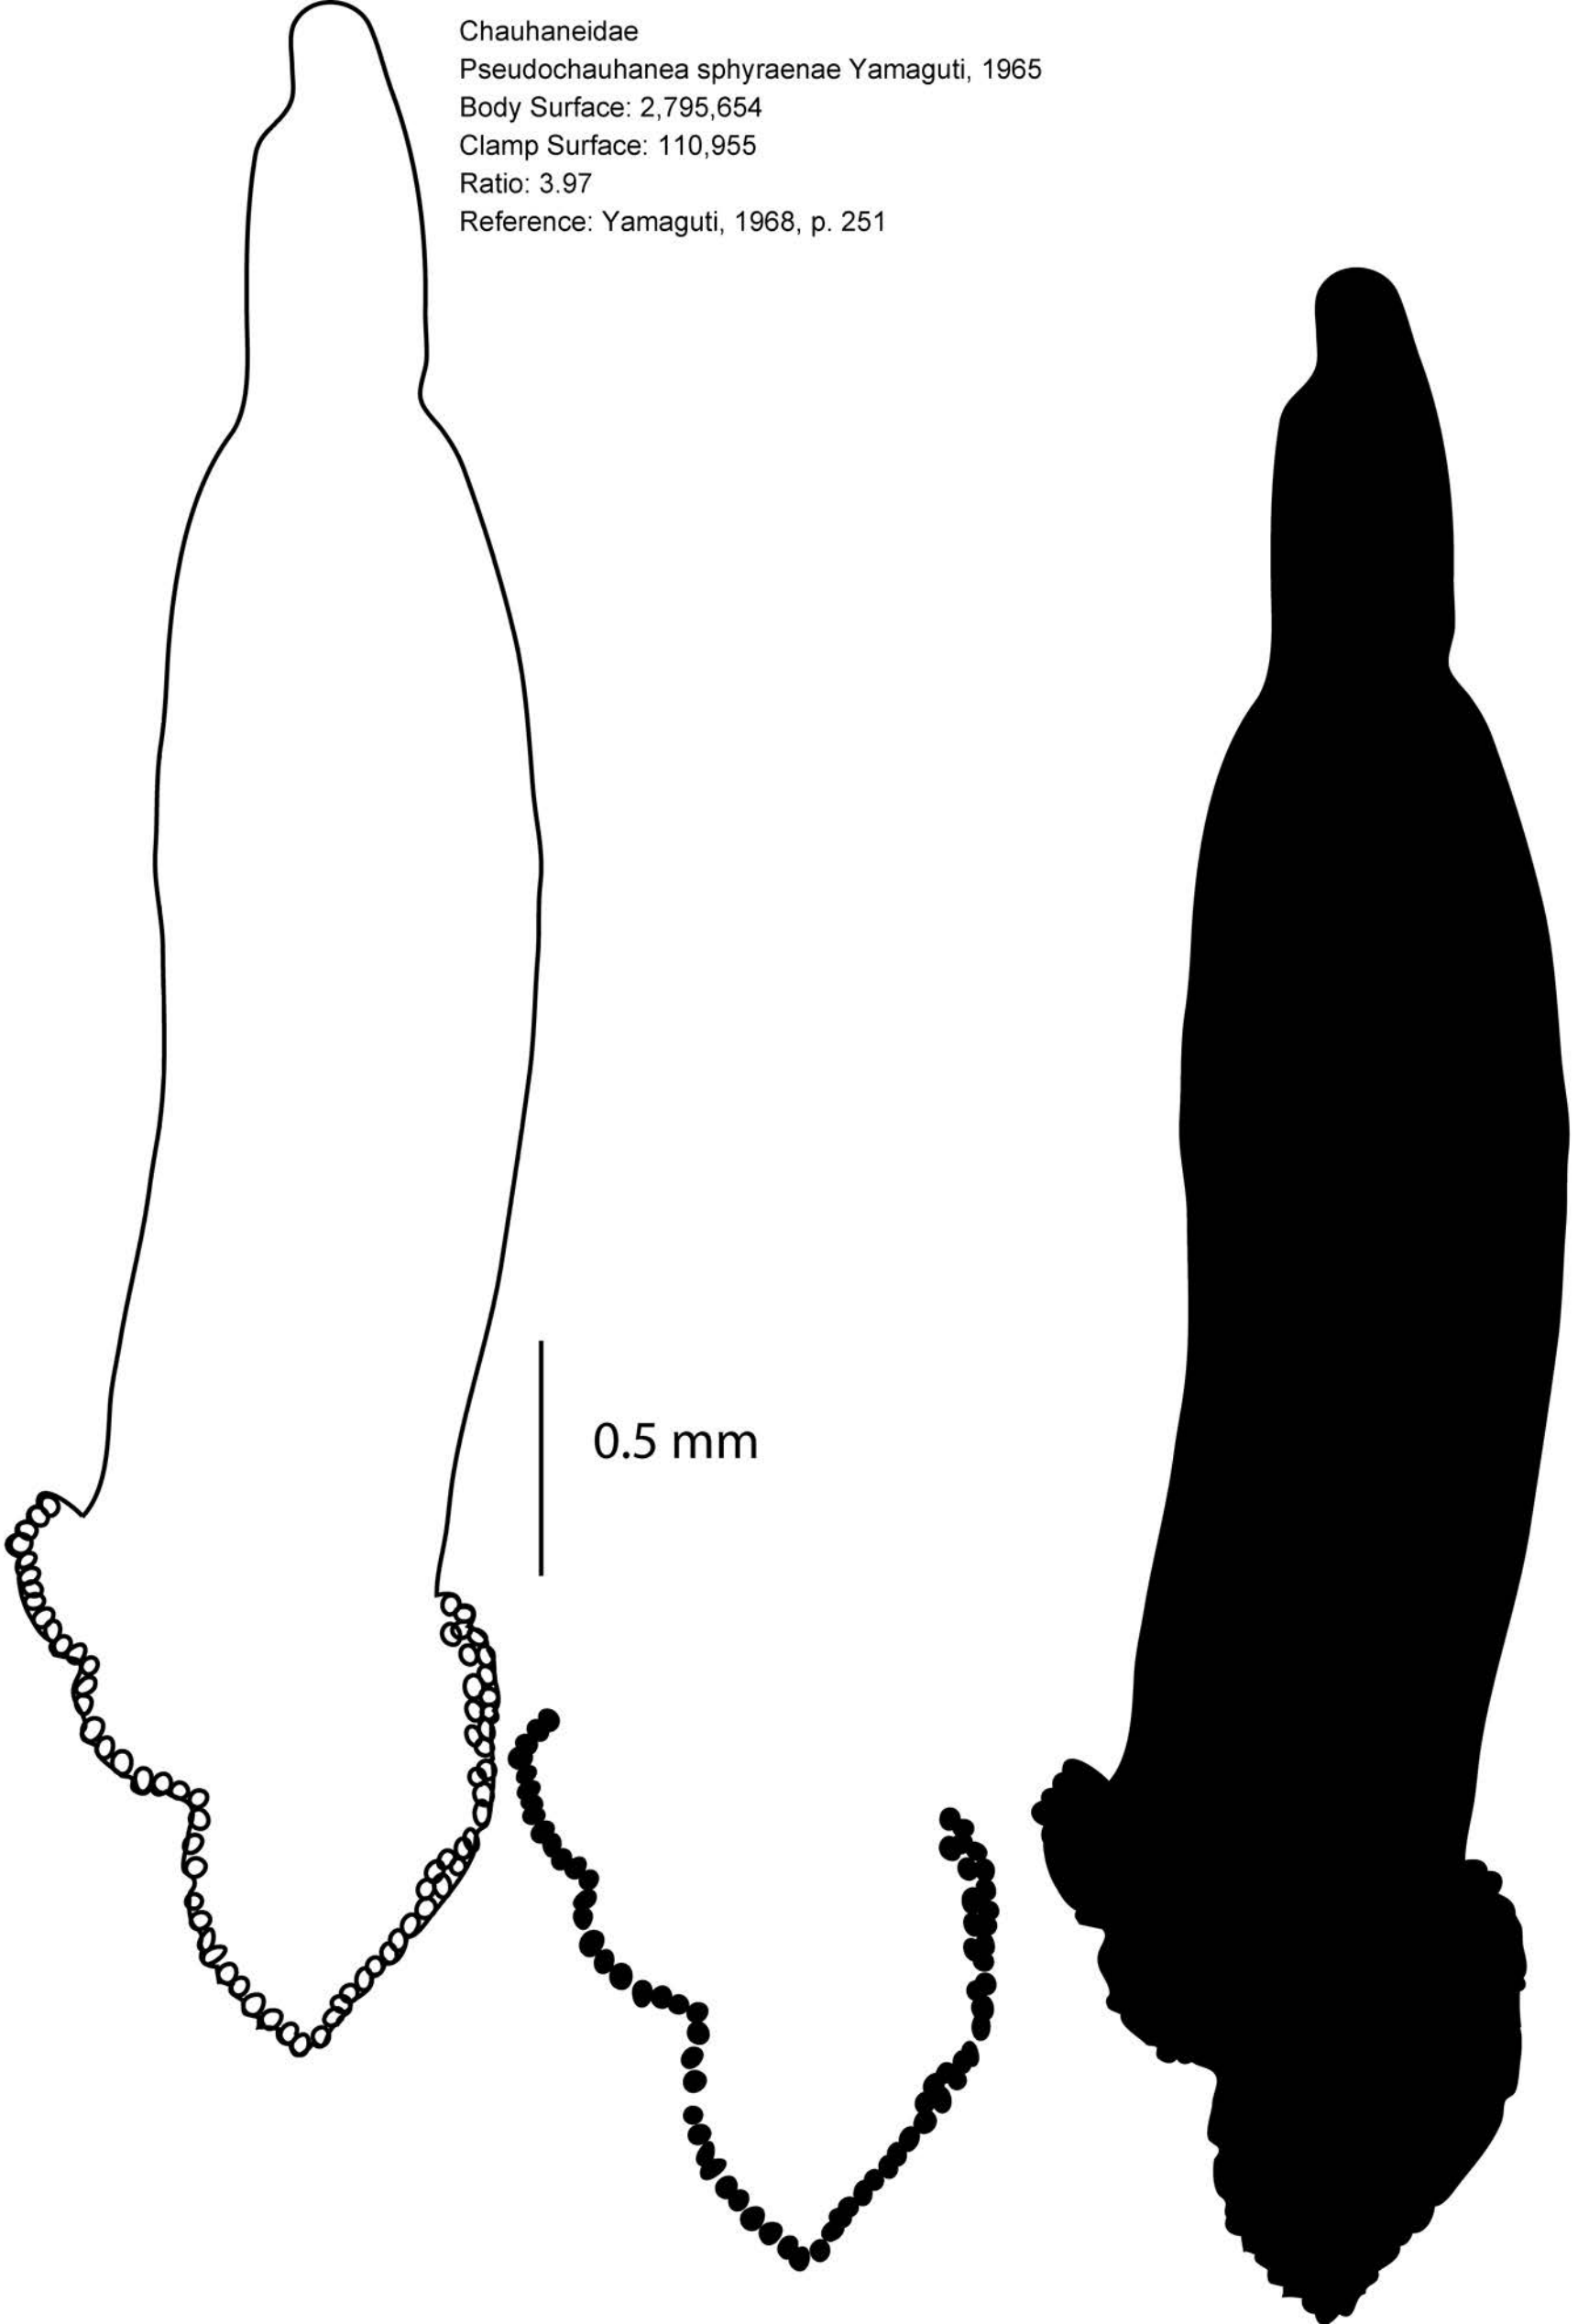

Chauhaneidae

*Pseudomazocraes monsvivisae* Caballero & Bravo Hollis, 1955

Body Surface: 811

Clamp Surface: 38

Ratio: 4.69

Reference: Caballero & Caballero, 1955, p. 108

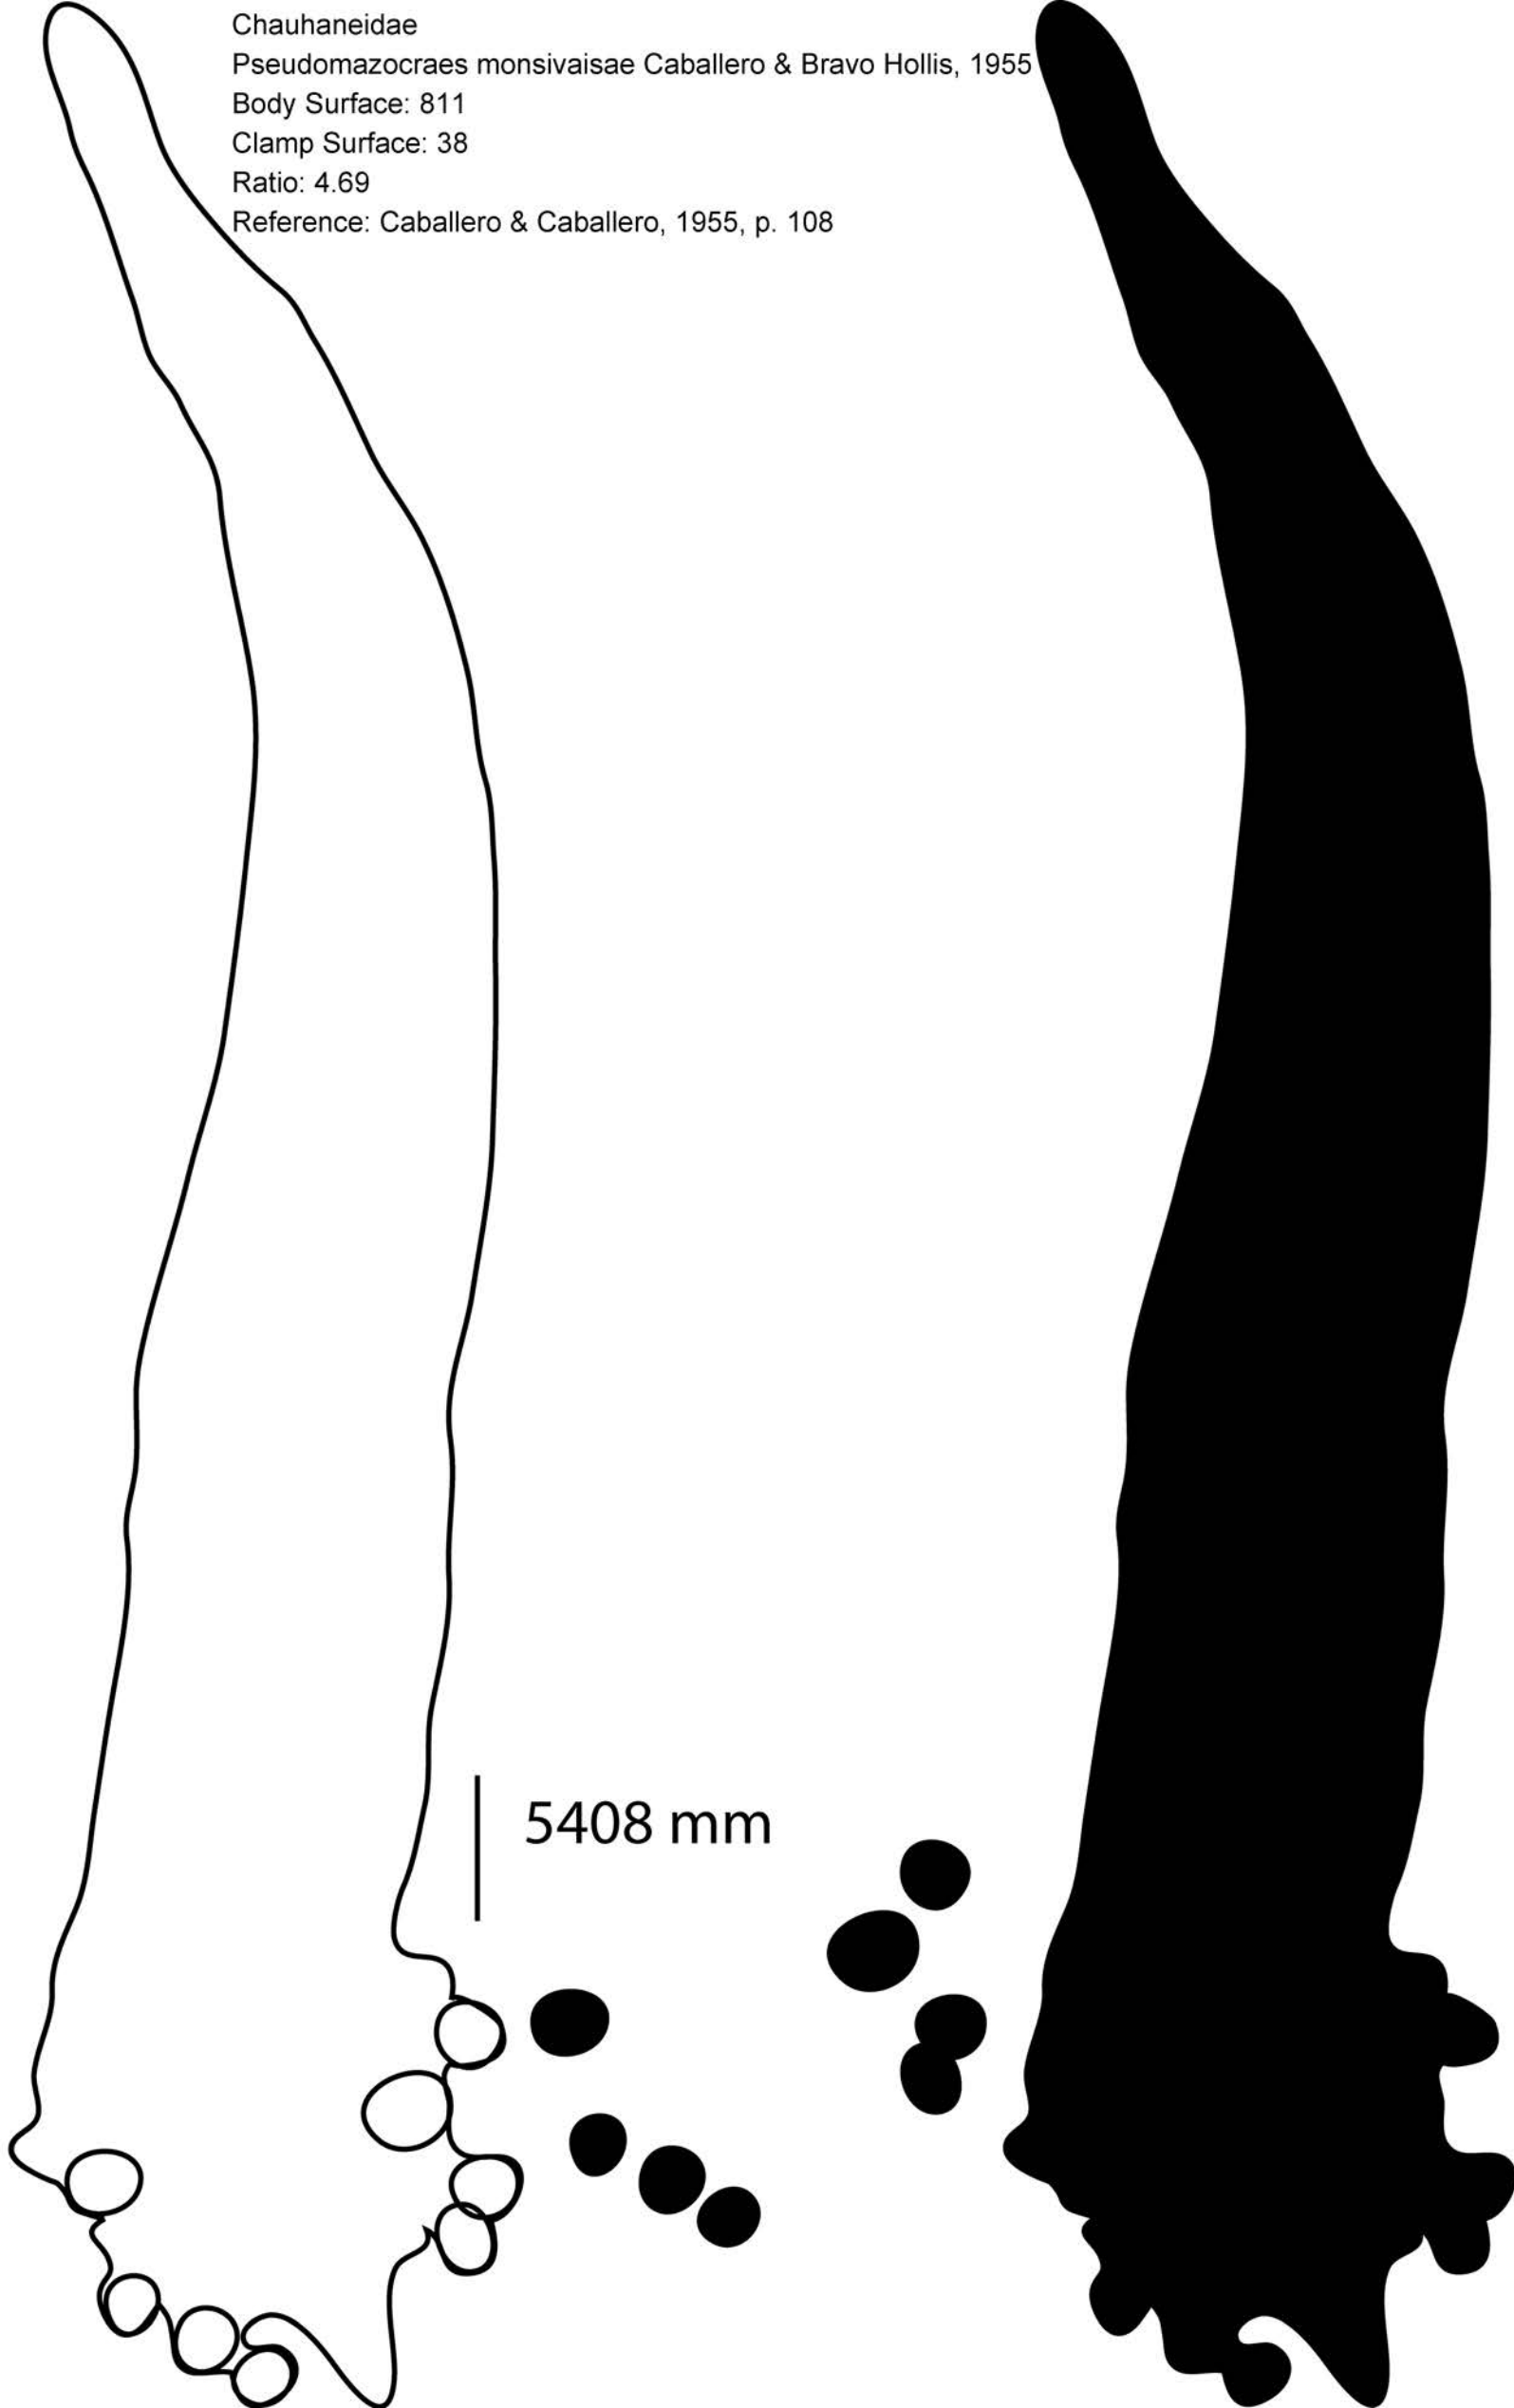

Family: Chauhaneidae  
Species: Pseudomazocraes selene Hargis, 1957  
Body Surface: 71,077  
Clamp Surface: 49,995  
Ratio: 6.48  
Reference: Hargis, 1957, p. 7

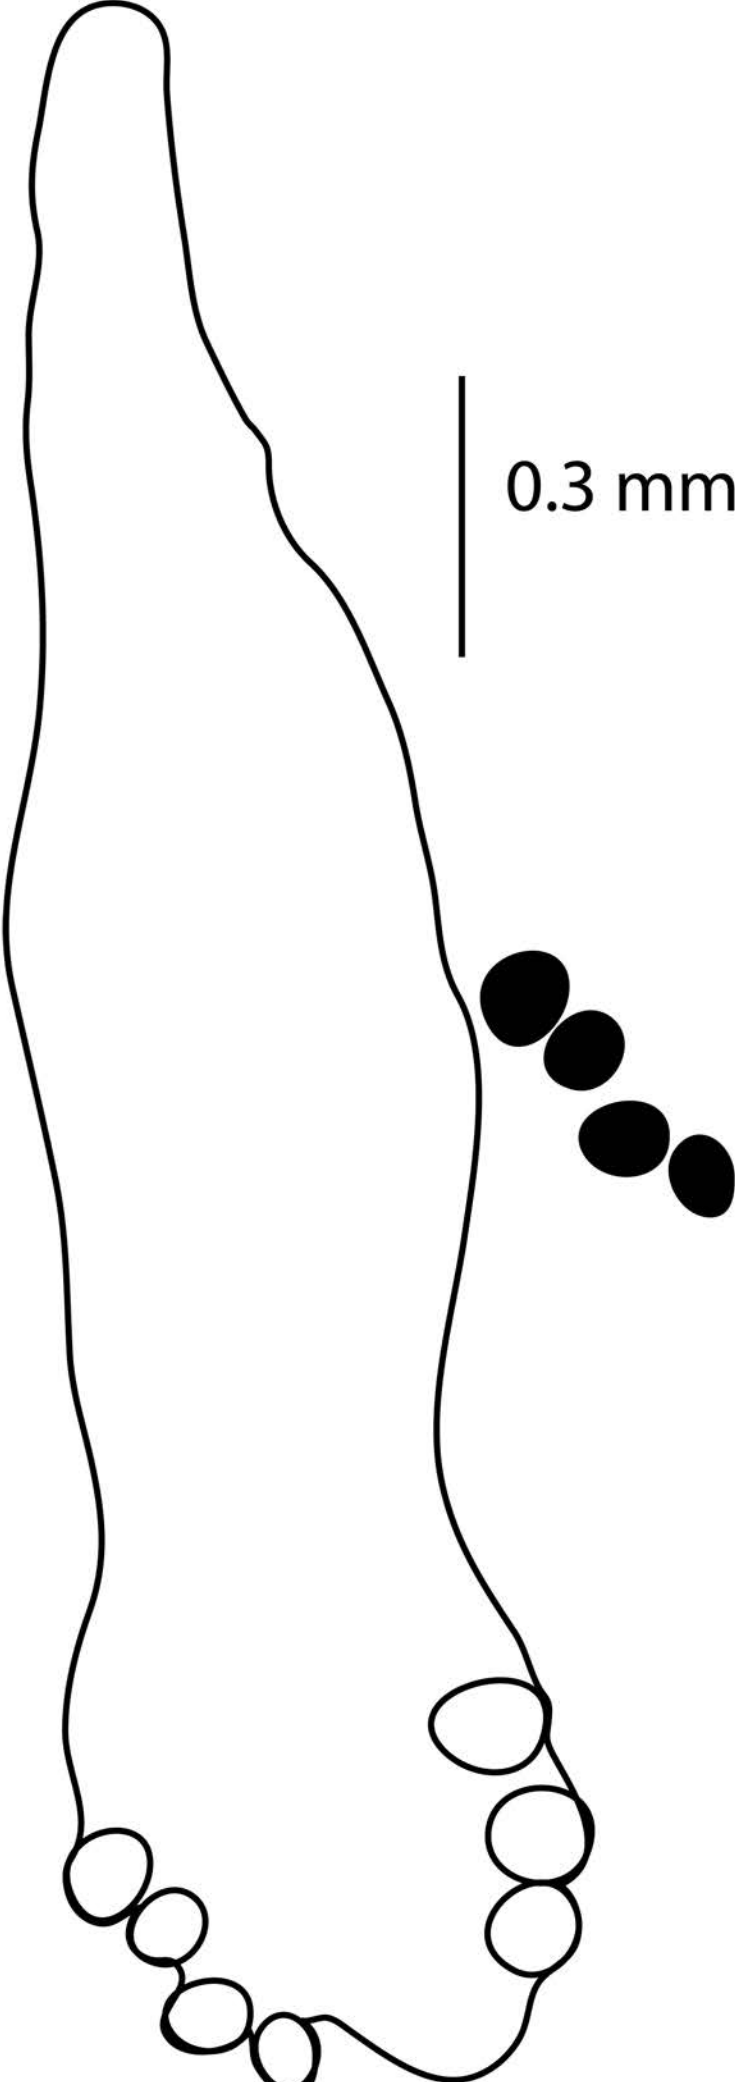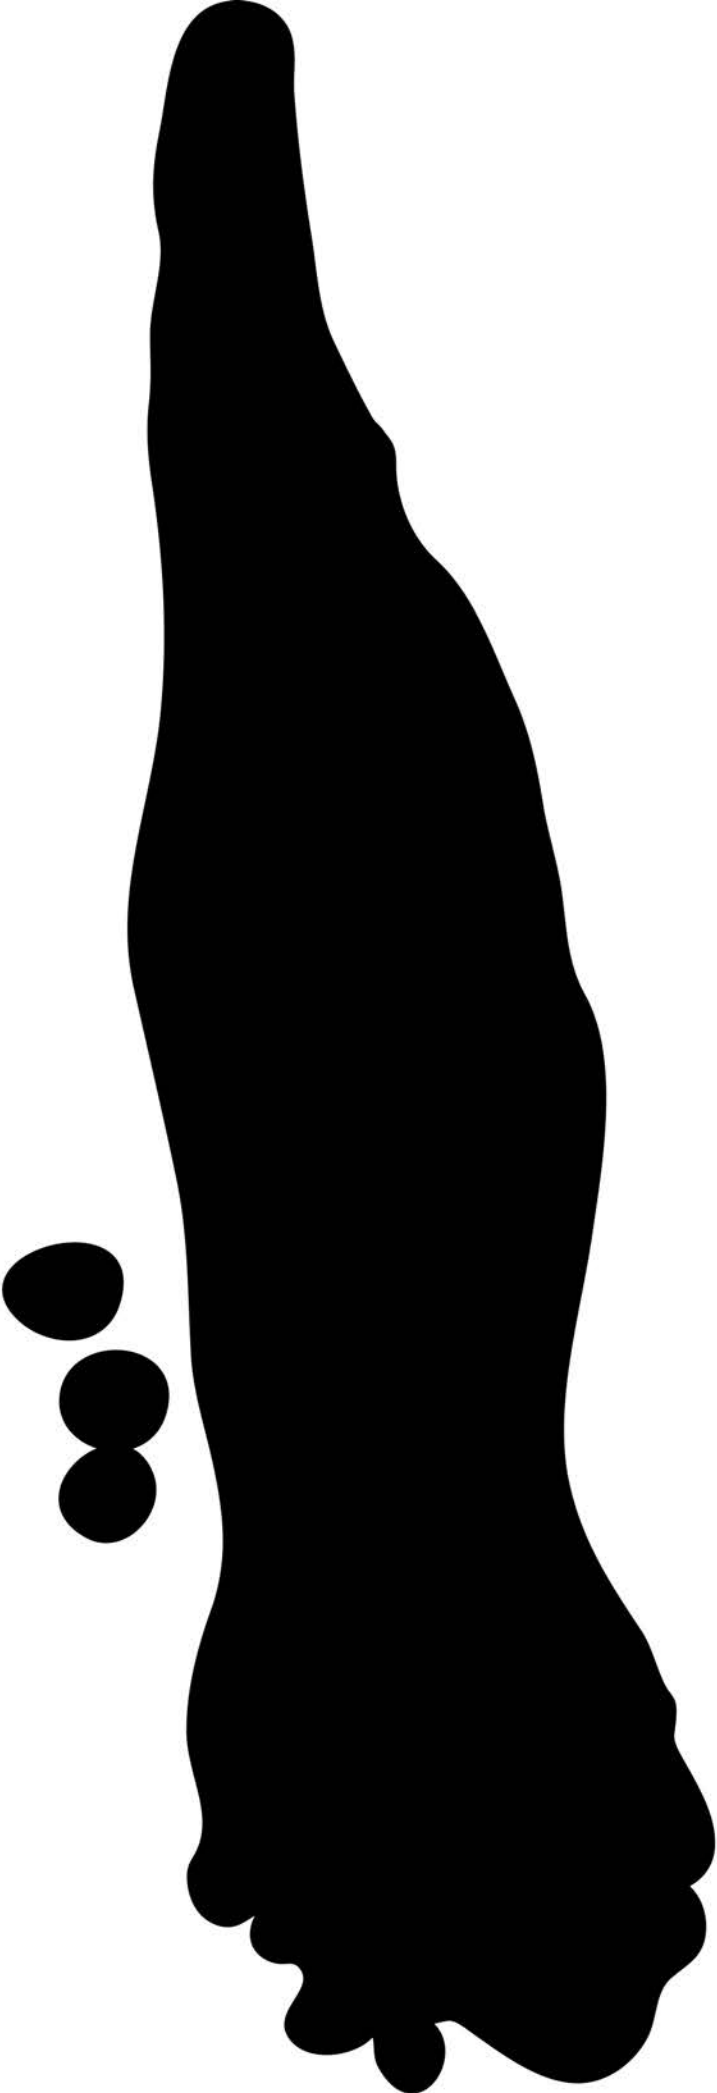

Family: Chauhaneidae

Species: *Pseudopisthogynopsis lepidocybii* Yamaguti, 1965

Body Surface: 8,160,745

Clamp Surface: 821,312

Ratio: 10.06

Reference: Lebedev, 1986, p. 117

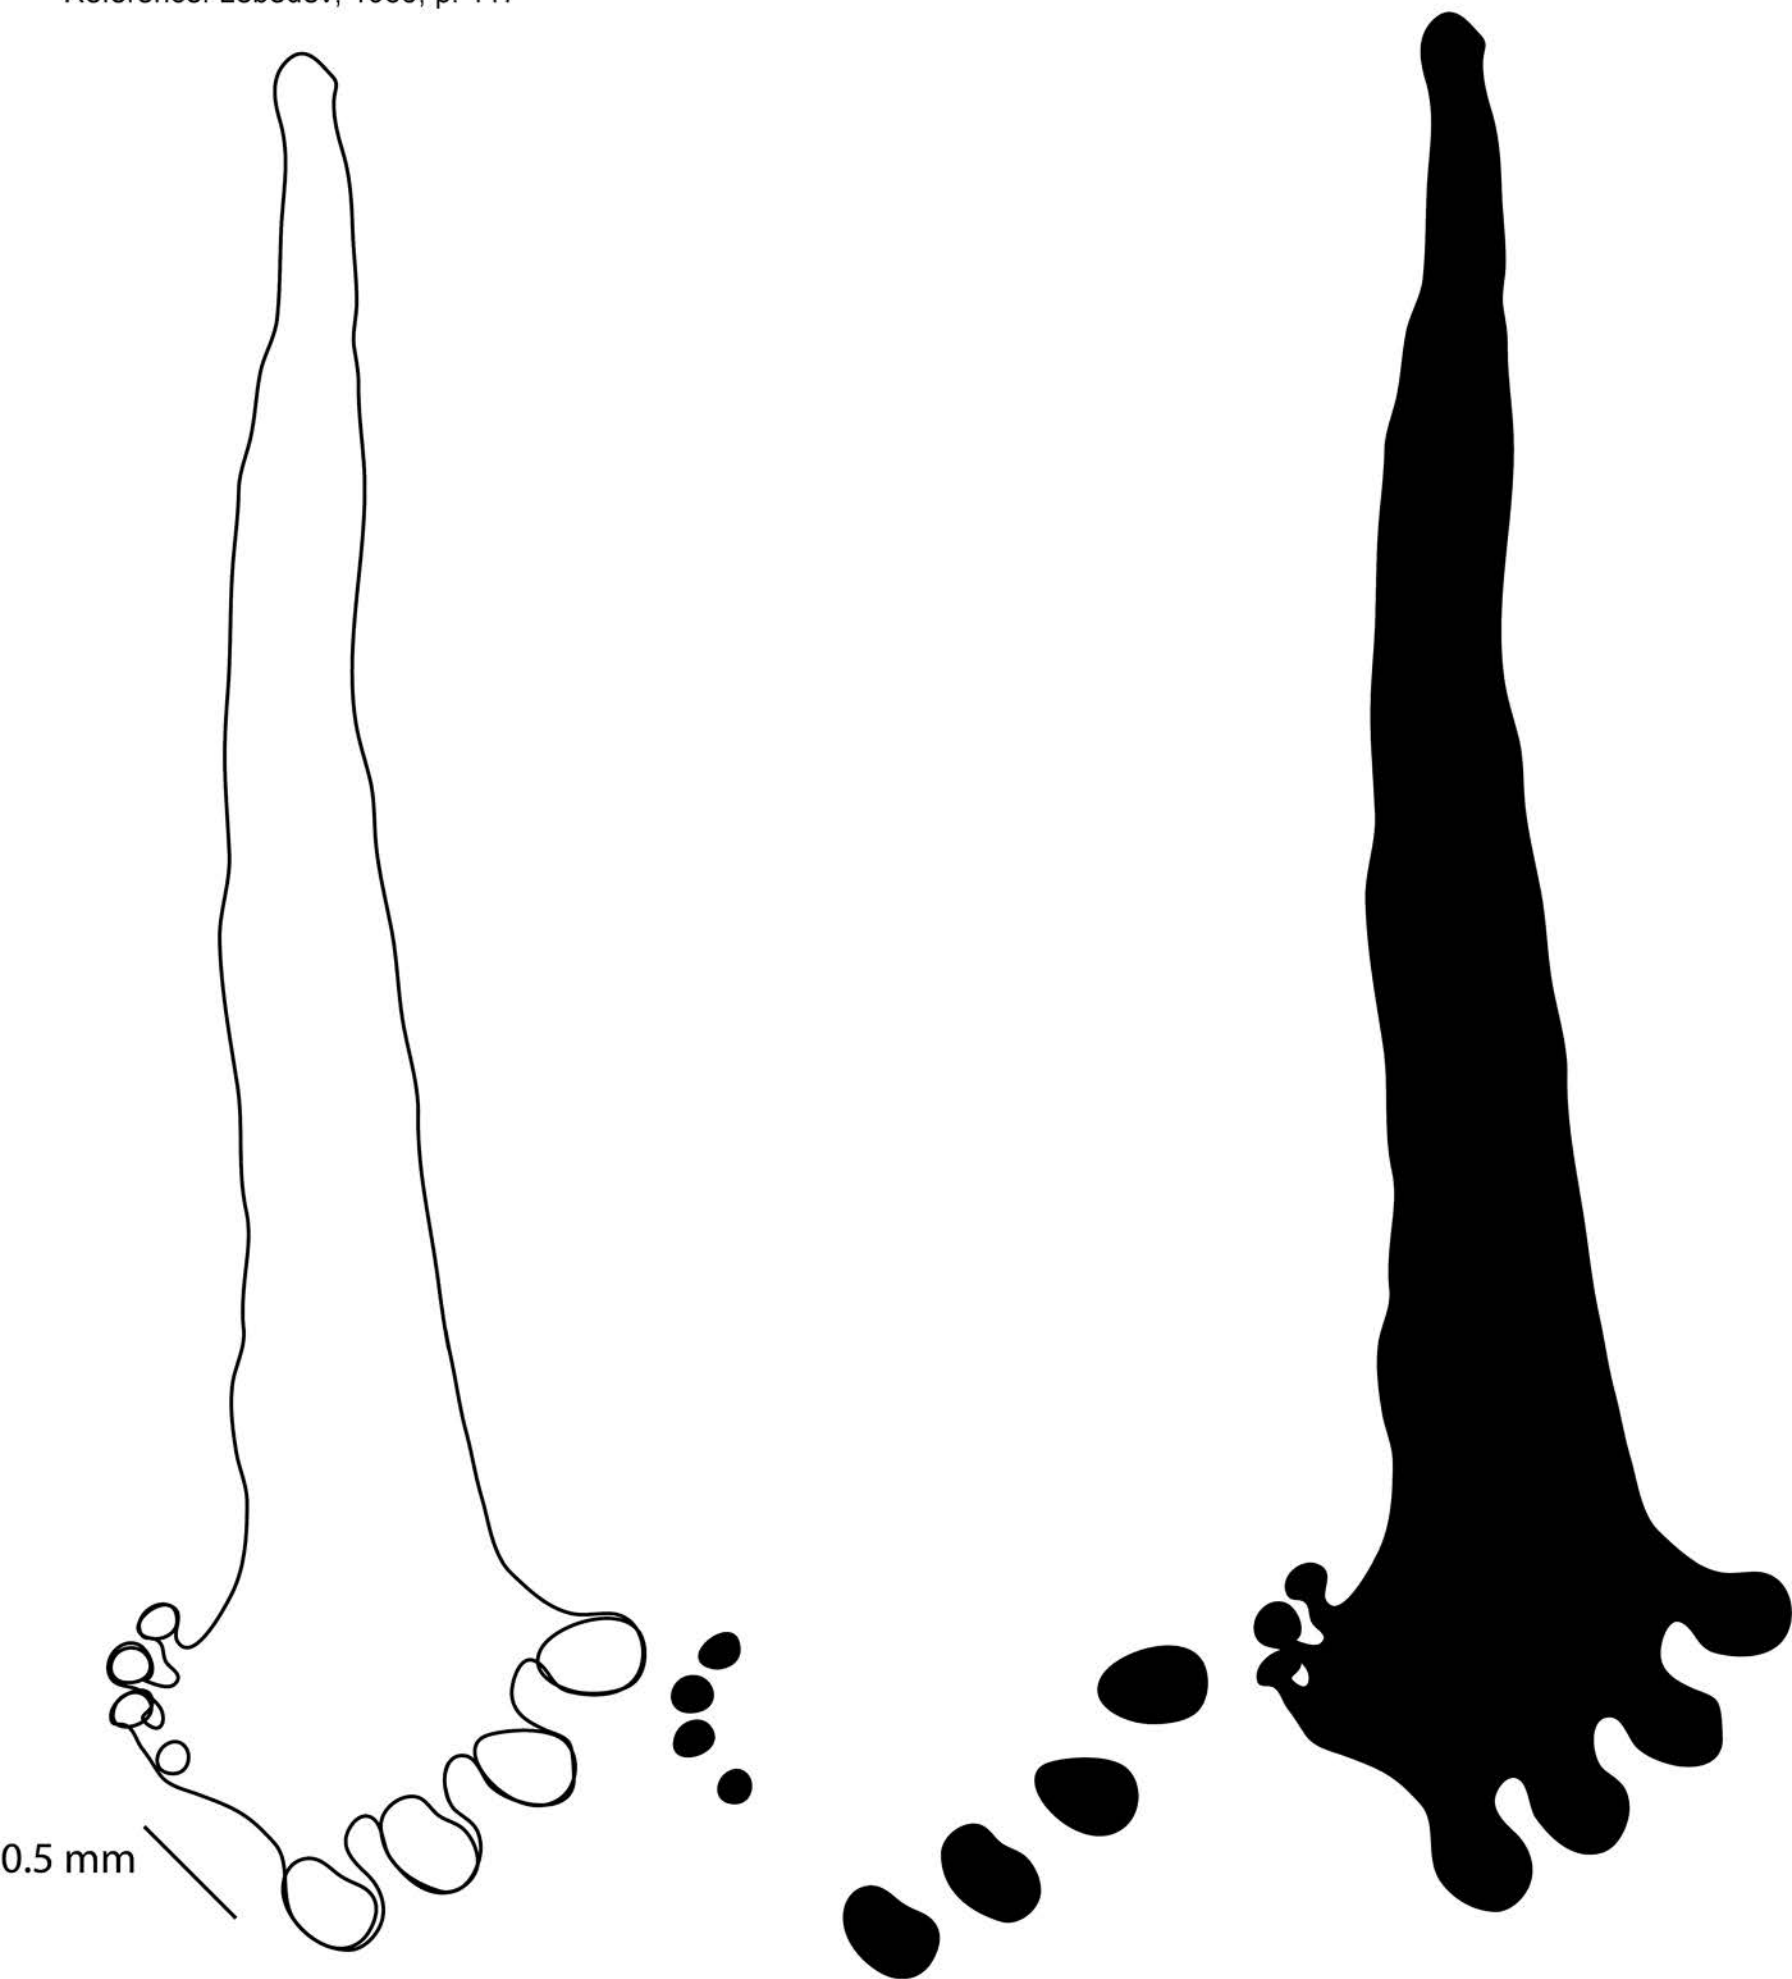

Family: Chauhaneidae  
Species: *Pseudopisthogyne lepidocybii*  
Yamaguti, 1965  
Body Surface: 2,106,993  
clamp Surface: 189,587  
Ratio: 9.00  
Reference: Yamaguti, 1965, p. 75

0.5 mm

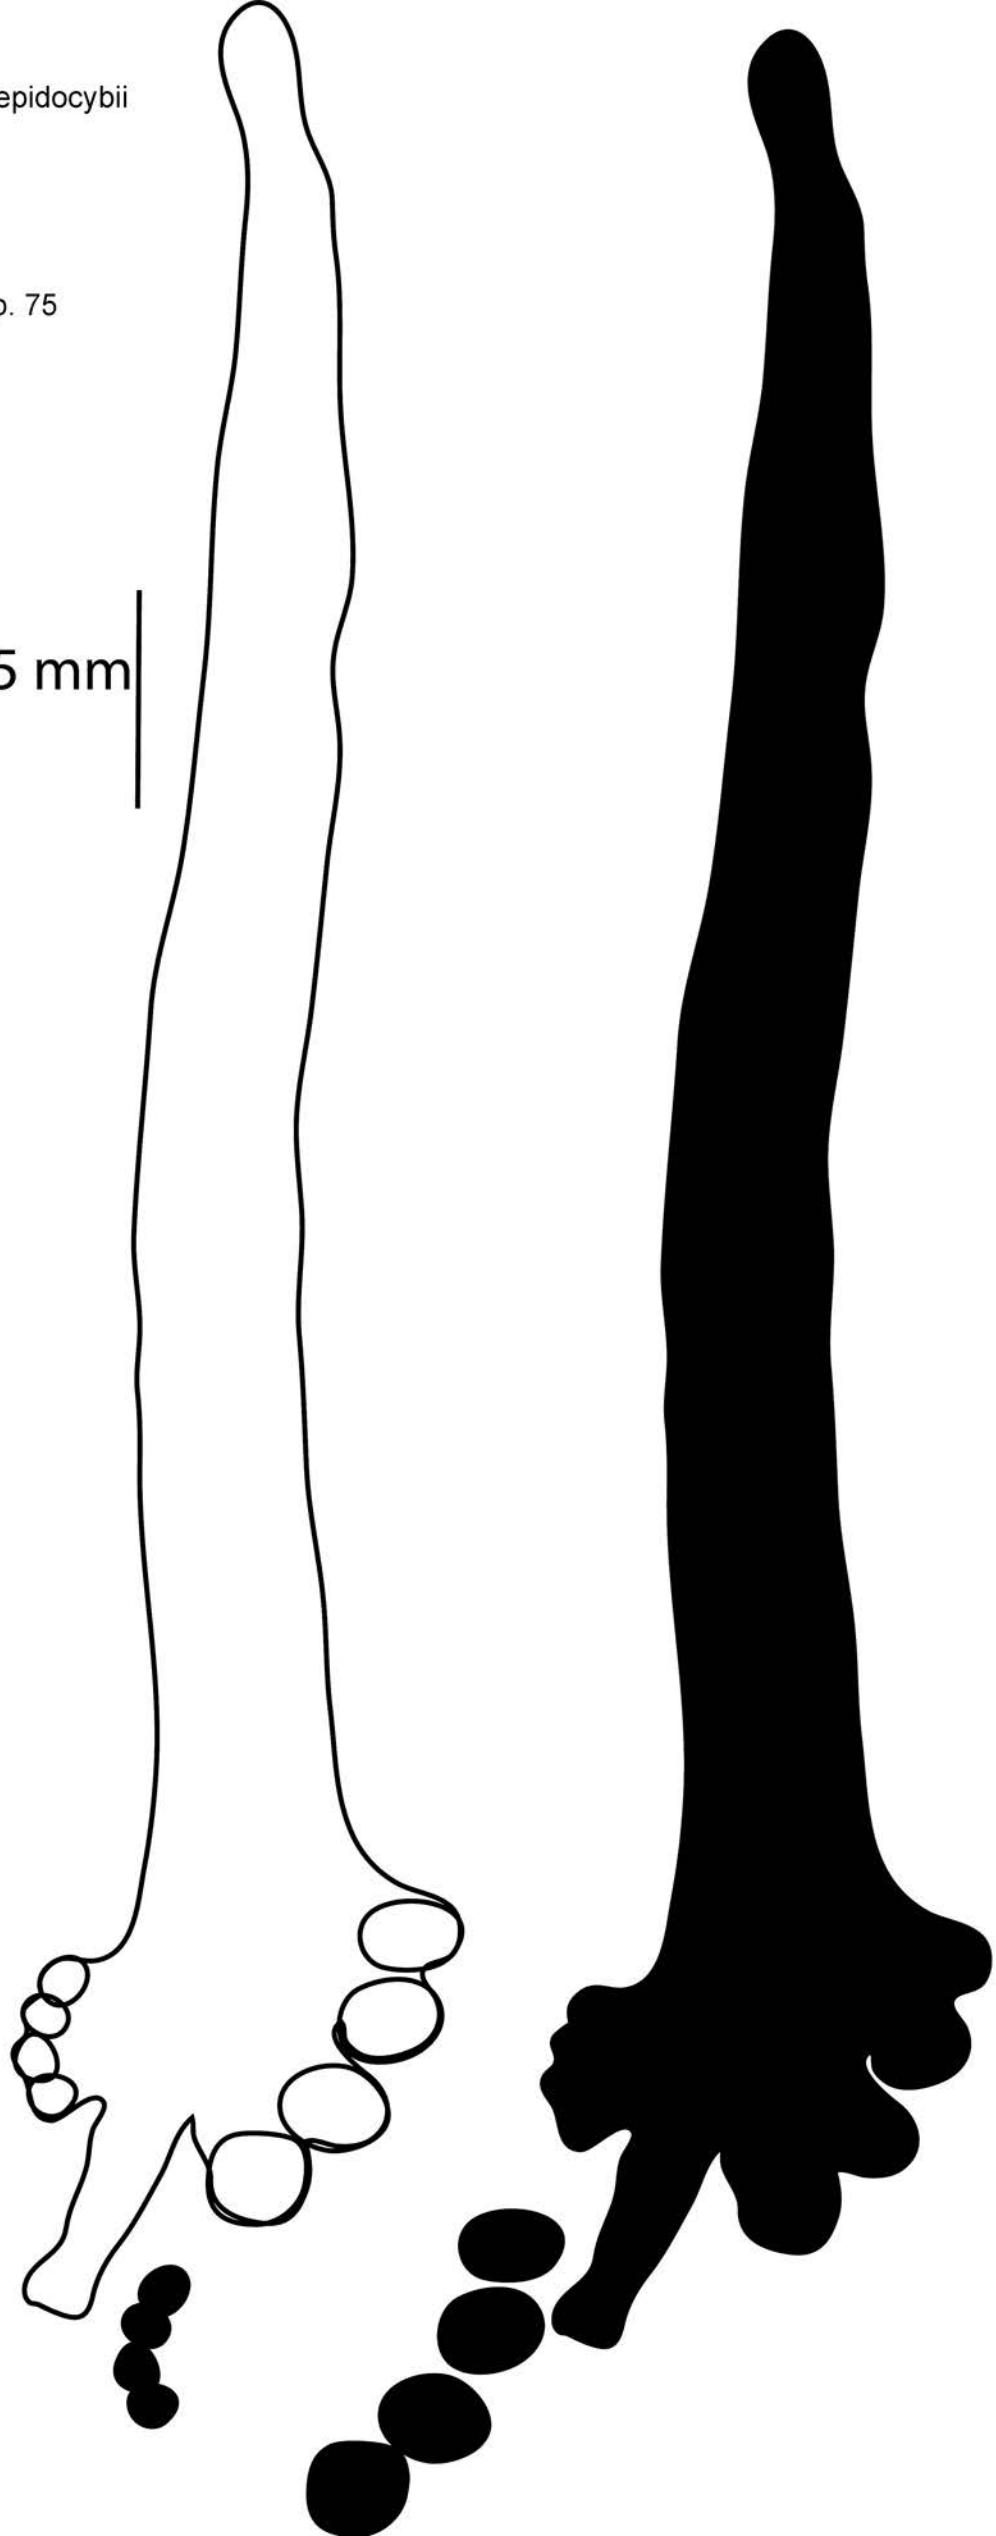

Family: Chauhaneidae

Species: *Salinacotyle mexicana* (Caballero & Bravo-Hollis, 1963) Lebedev, 1984

Body Surface: 1,425,544

Clamp Surface: 103,400

Ratio: 7.25

Reference: Lebedev, 1986, p. 138

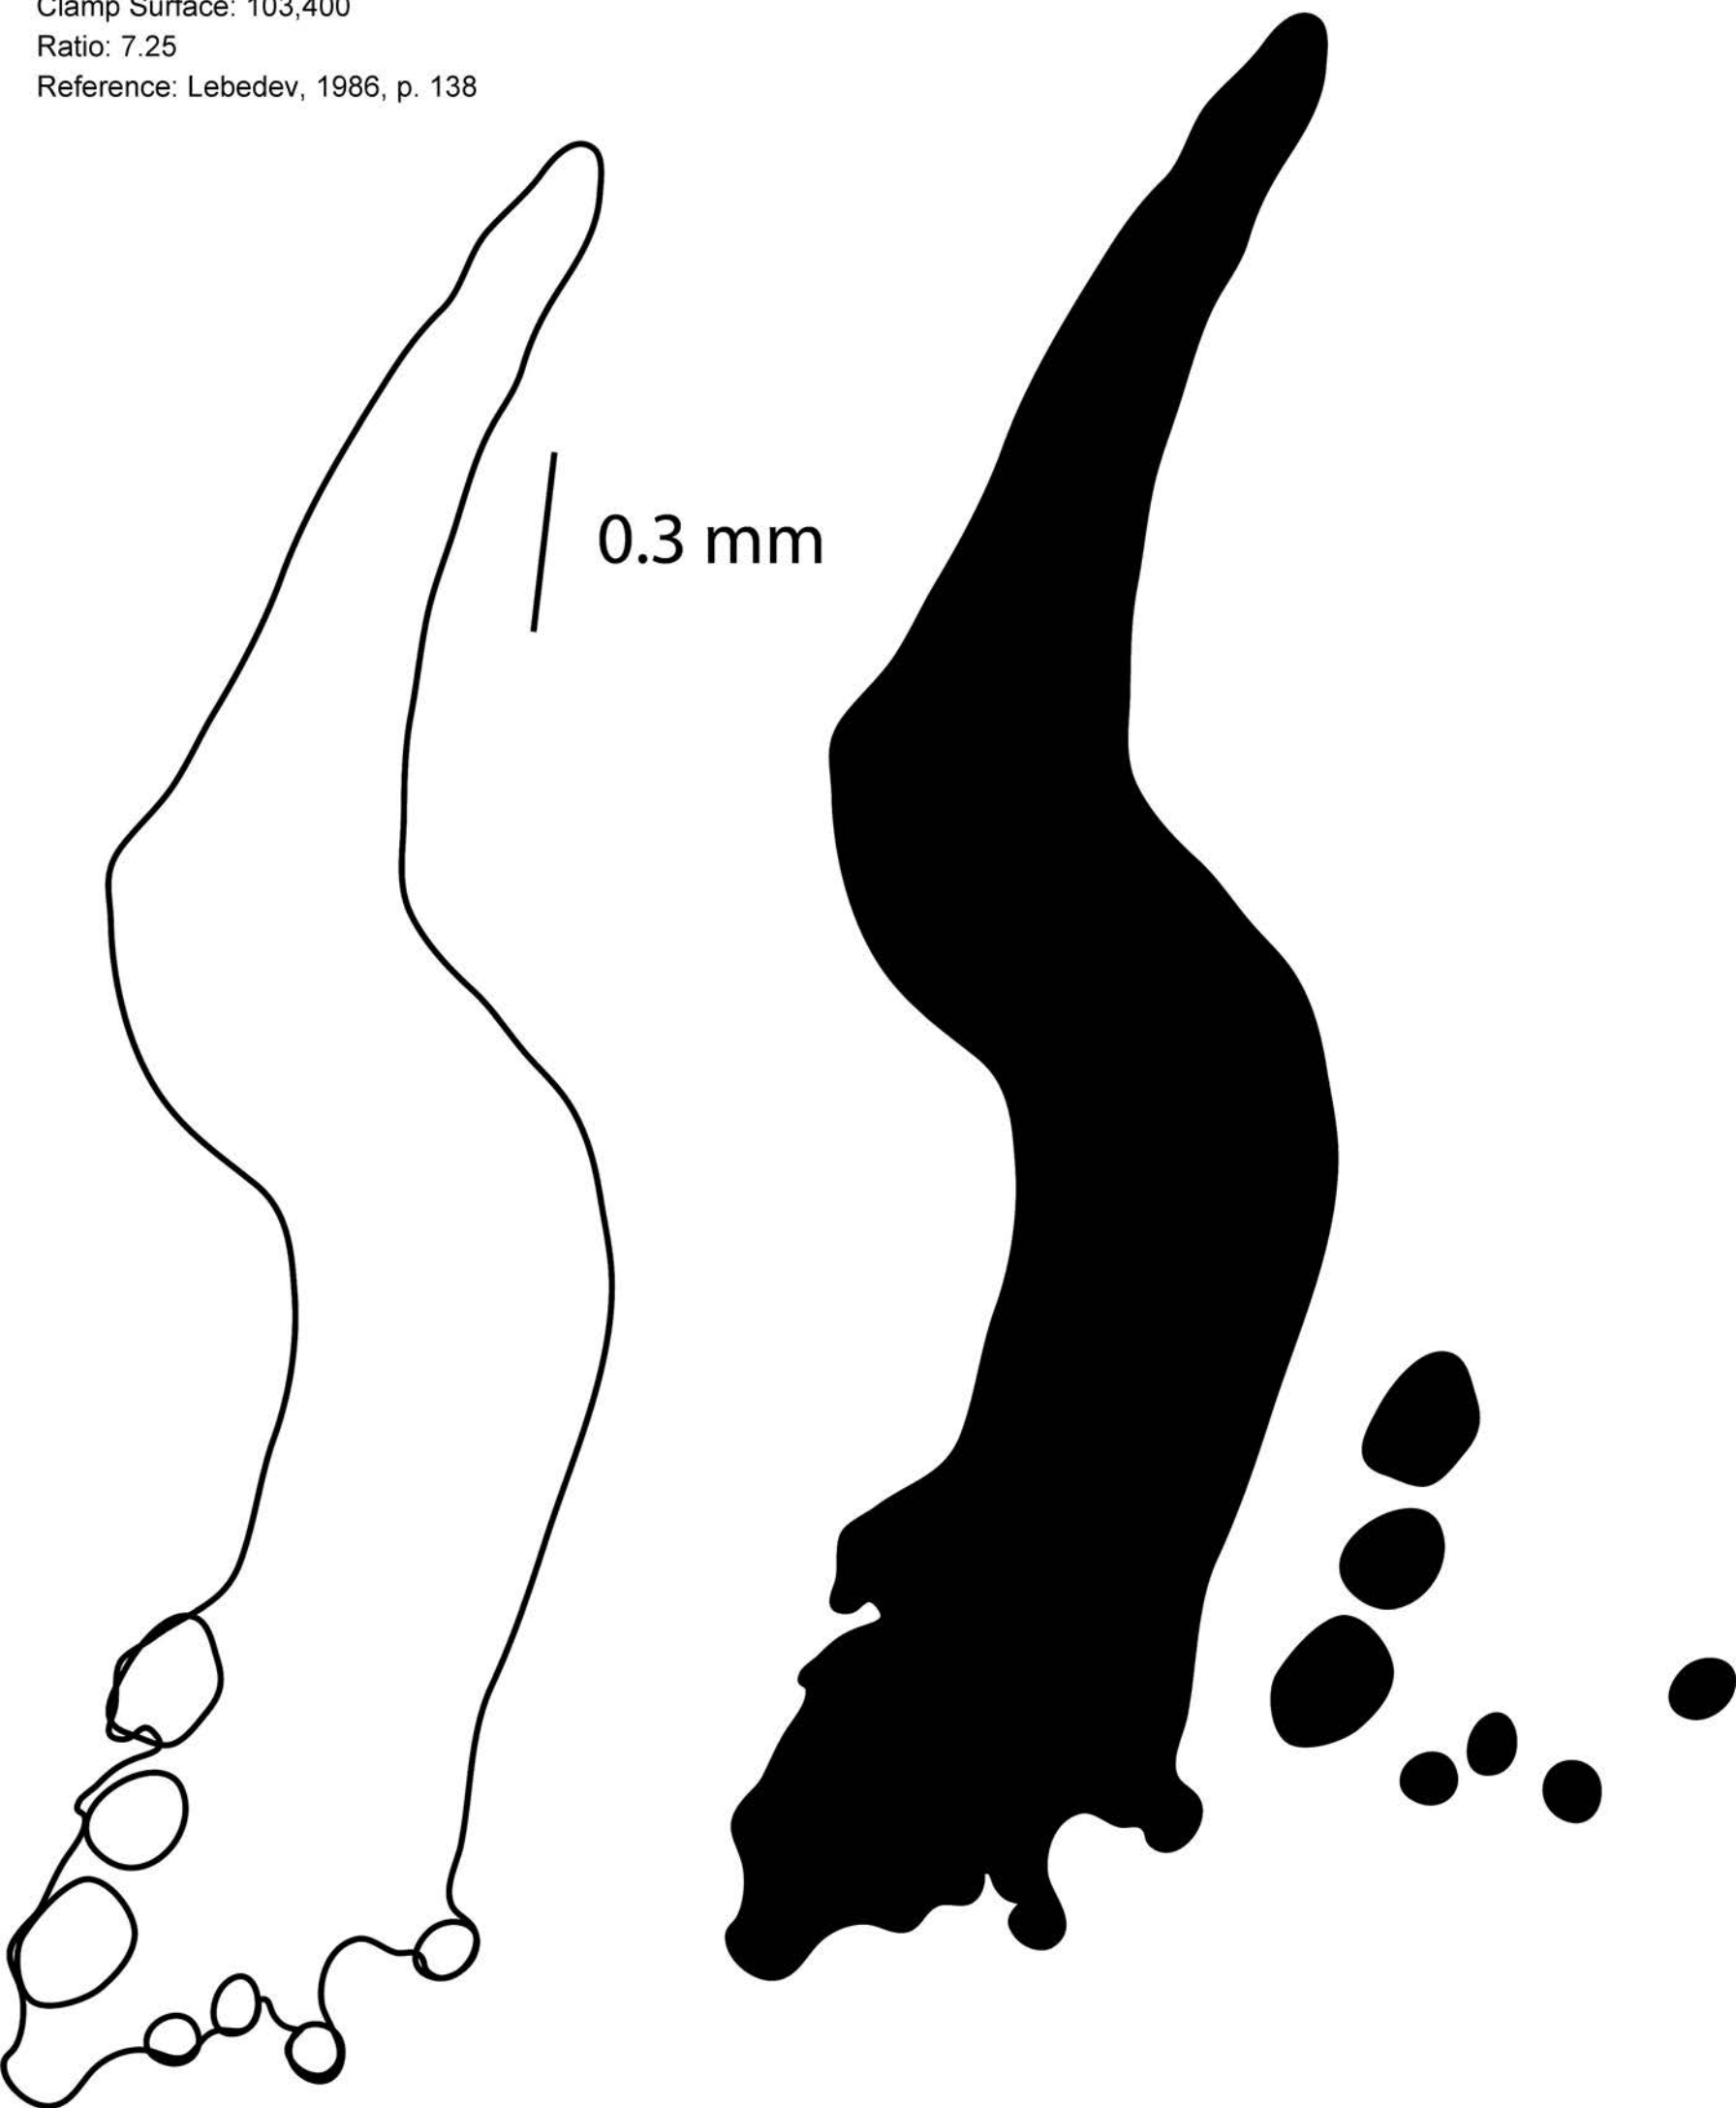

Family: Gastrocotylidae

Species: *Allopseudaxine macrova* (Unnithan, 1957) Yamaguti, 1963

Body Surface: 4,858,980

Clamp Surface: 388,611

Ratio: 8.00

Reference: Yamaguti, 1963, p. 265

1 mm

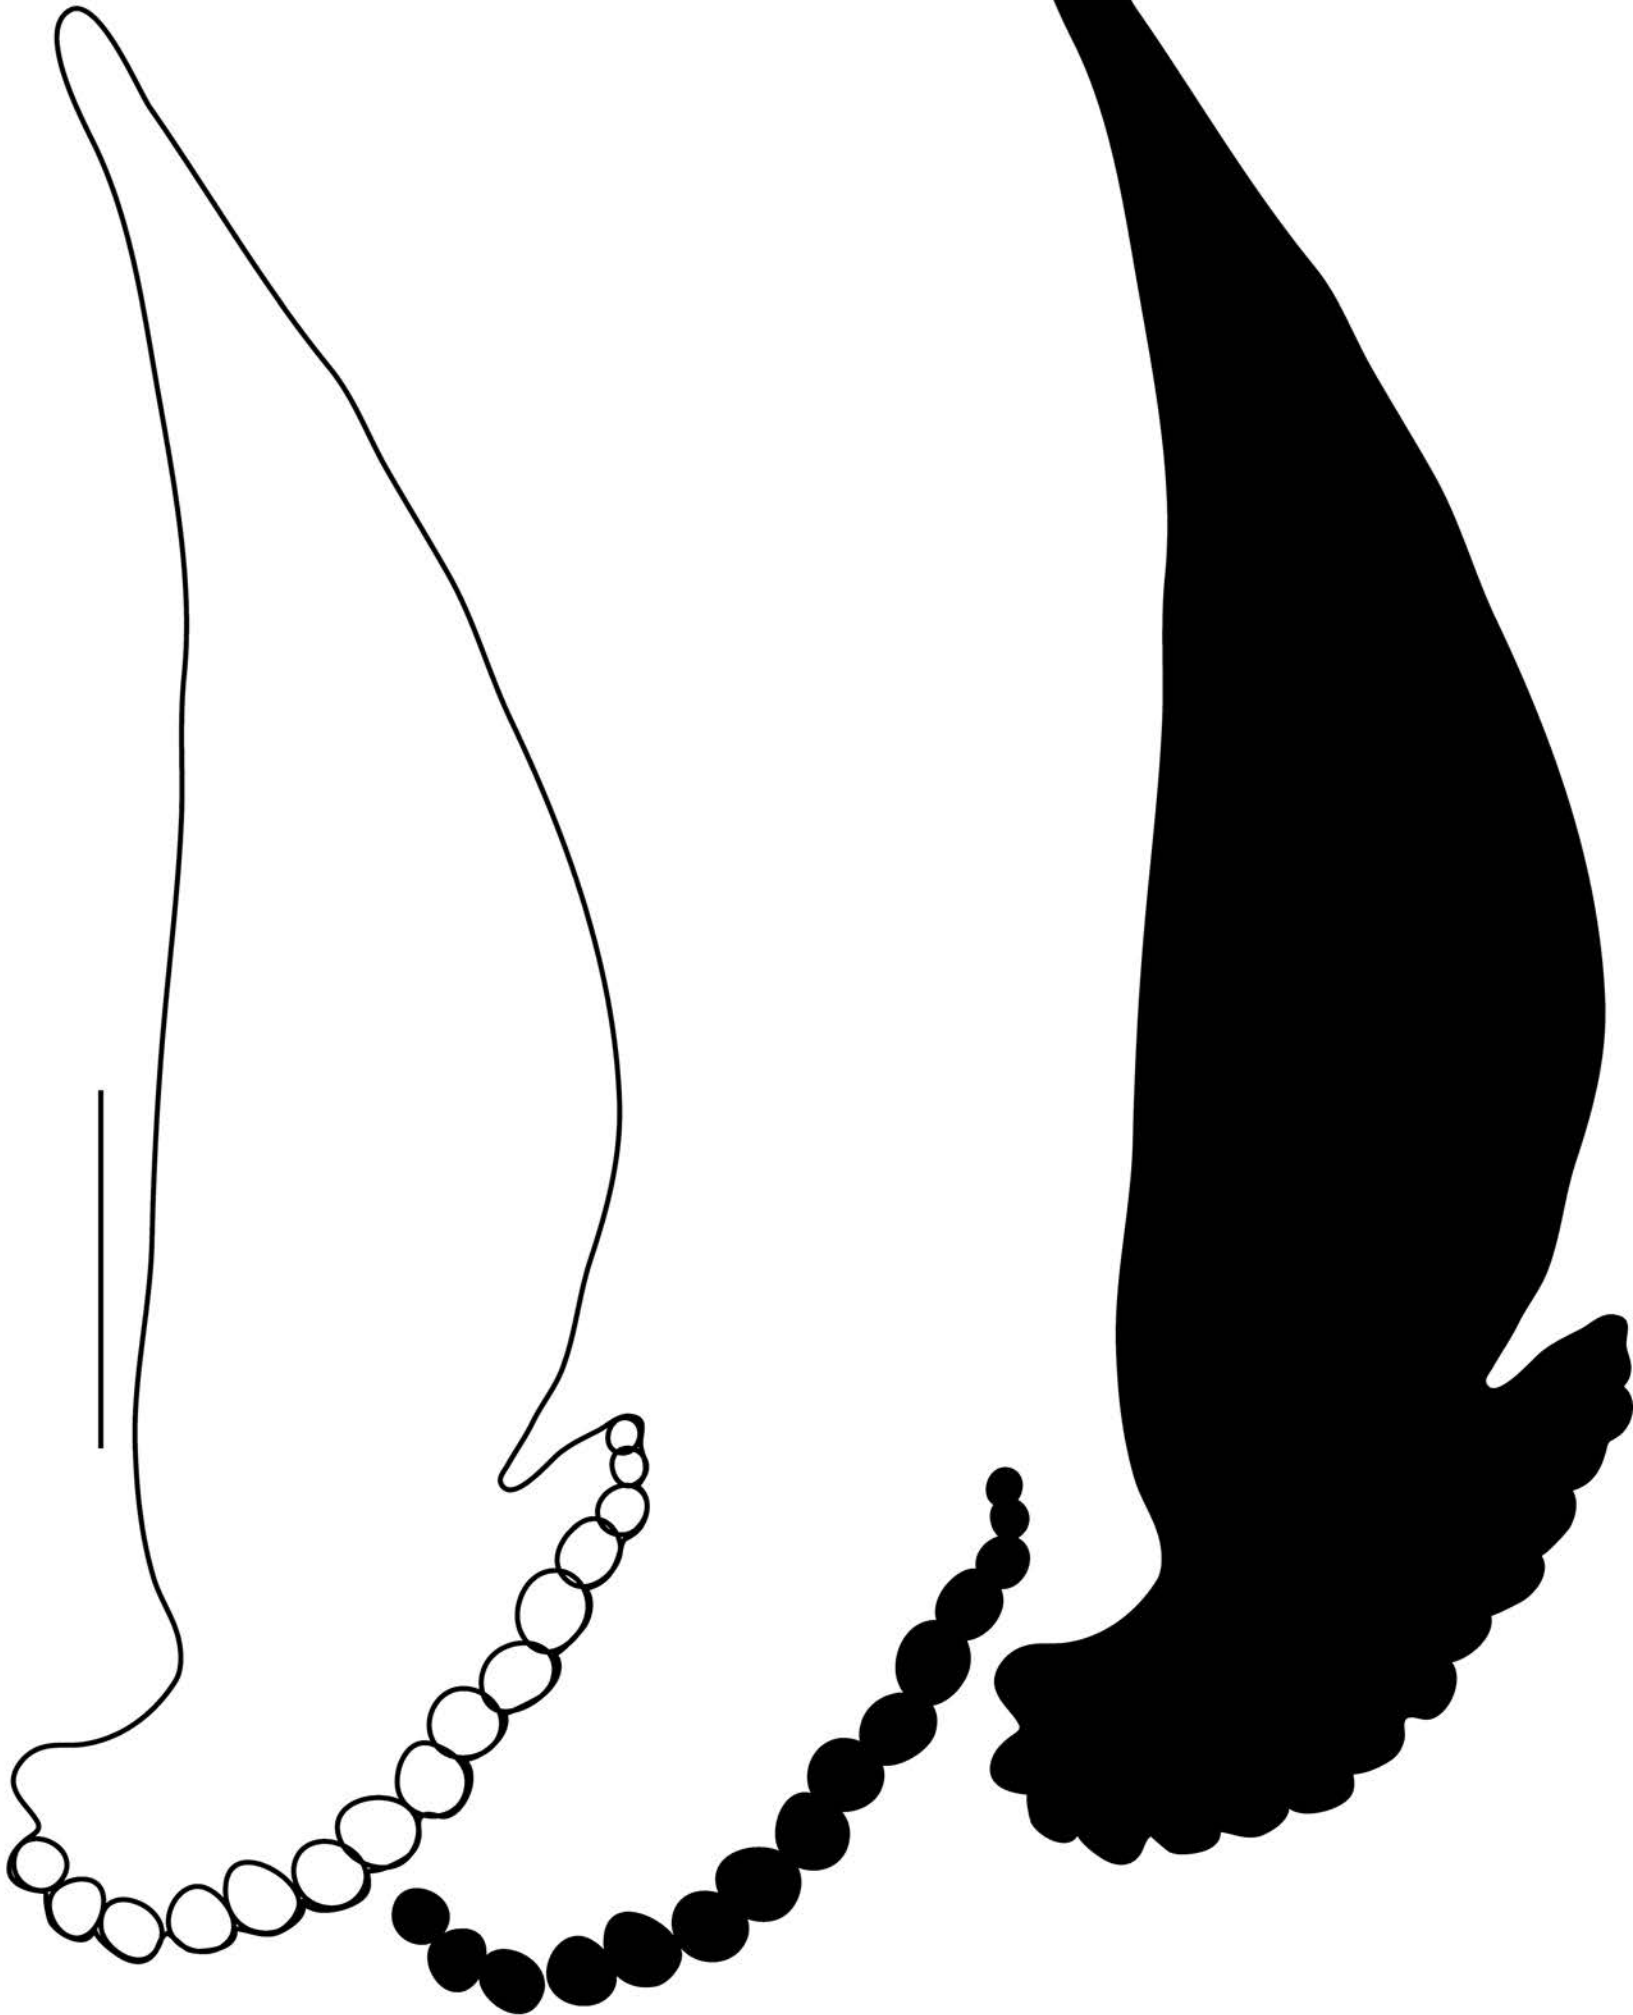

Family: Gastrocotylidae  
Species: *Allopseudaxine yaito* Yamaguti, 1968  
Body Surface: 14,764,474  
Clamp Surface: 485,975  
Ratio: 3.29  
Reference: Yamaguti, 1968, p. 251

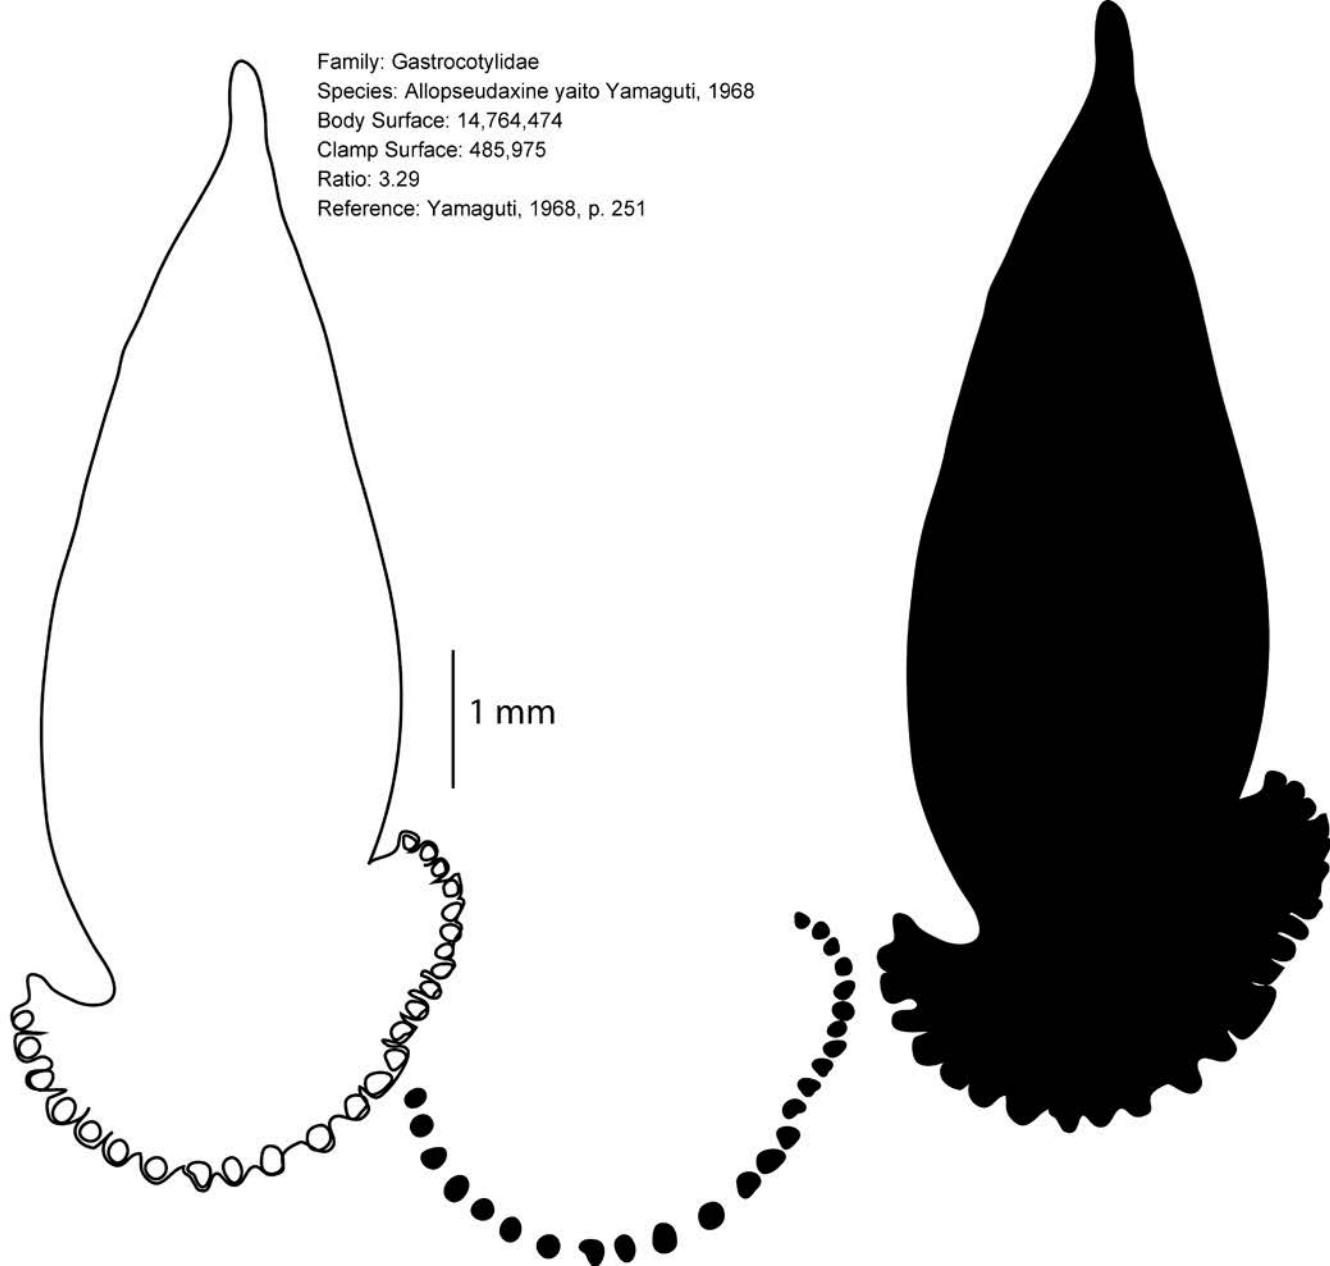



Family: Gastrocotylidae

Species: *Allopseudaxinoides euthynni* Yamaguti, 1965

Body Surface: 11,587,179

Clamp Surface: 720,066

Ratio: 6.21

Reference: Yamaguti, 1965, p. 84

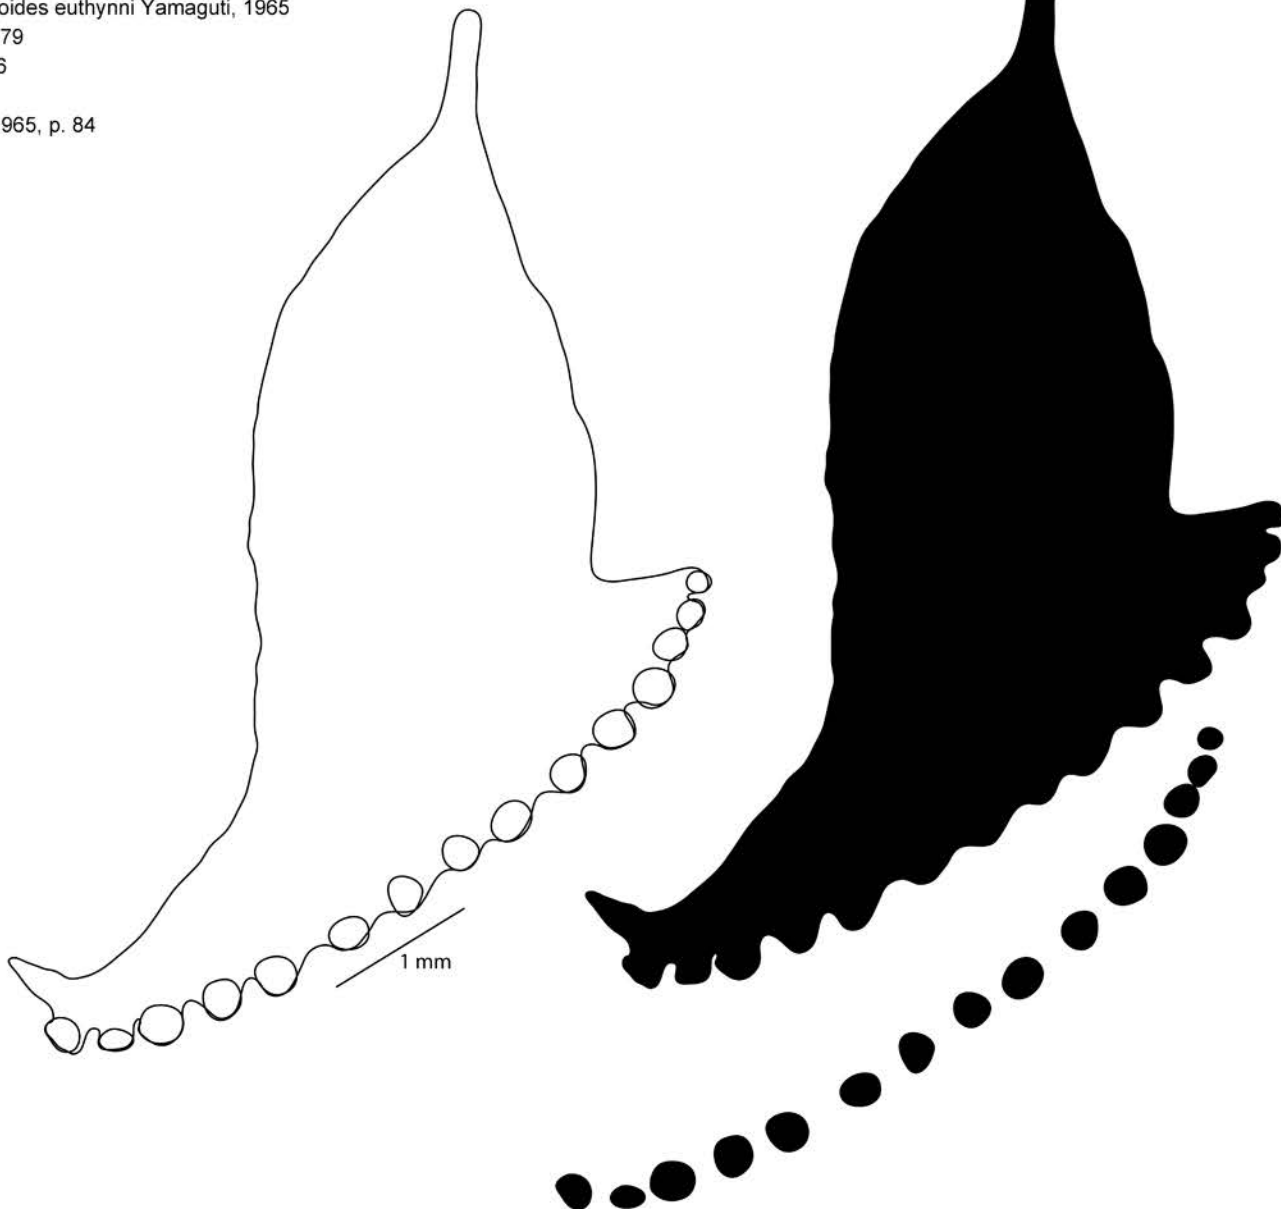

Family: Gastrocotylidae  
Species: *Amphipolycotyle chloroscombrus* Hargis, 1957  
Body Surface: 209,204  
Clamp Surface: 22,656  
Ratio: 10.83  
Reference: Hargis, 1957, p. 5

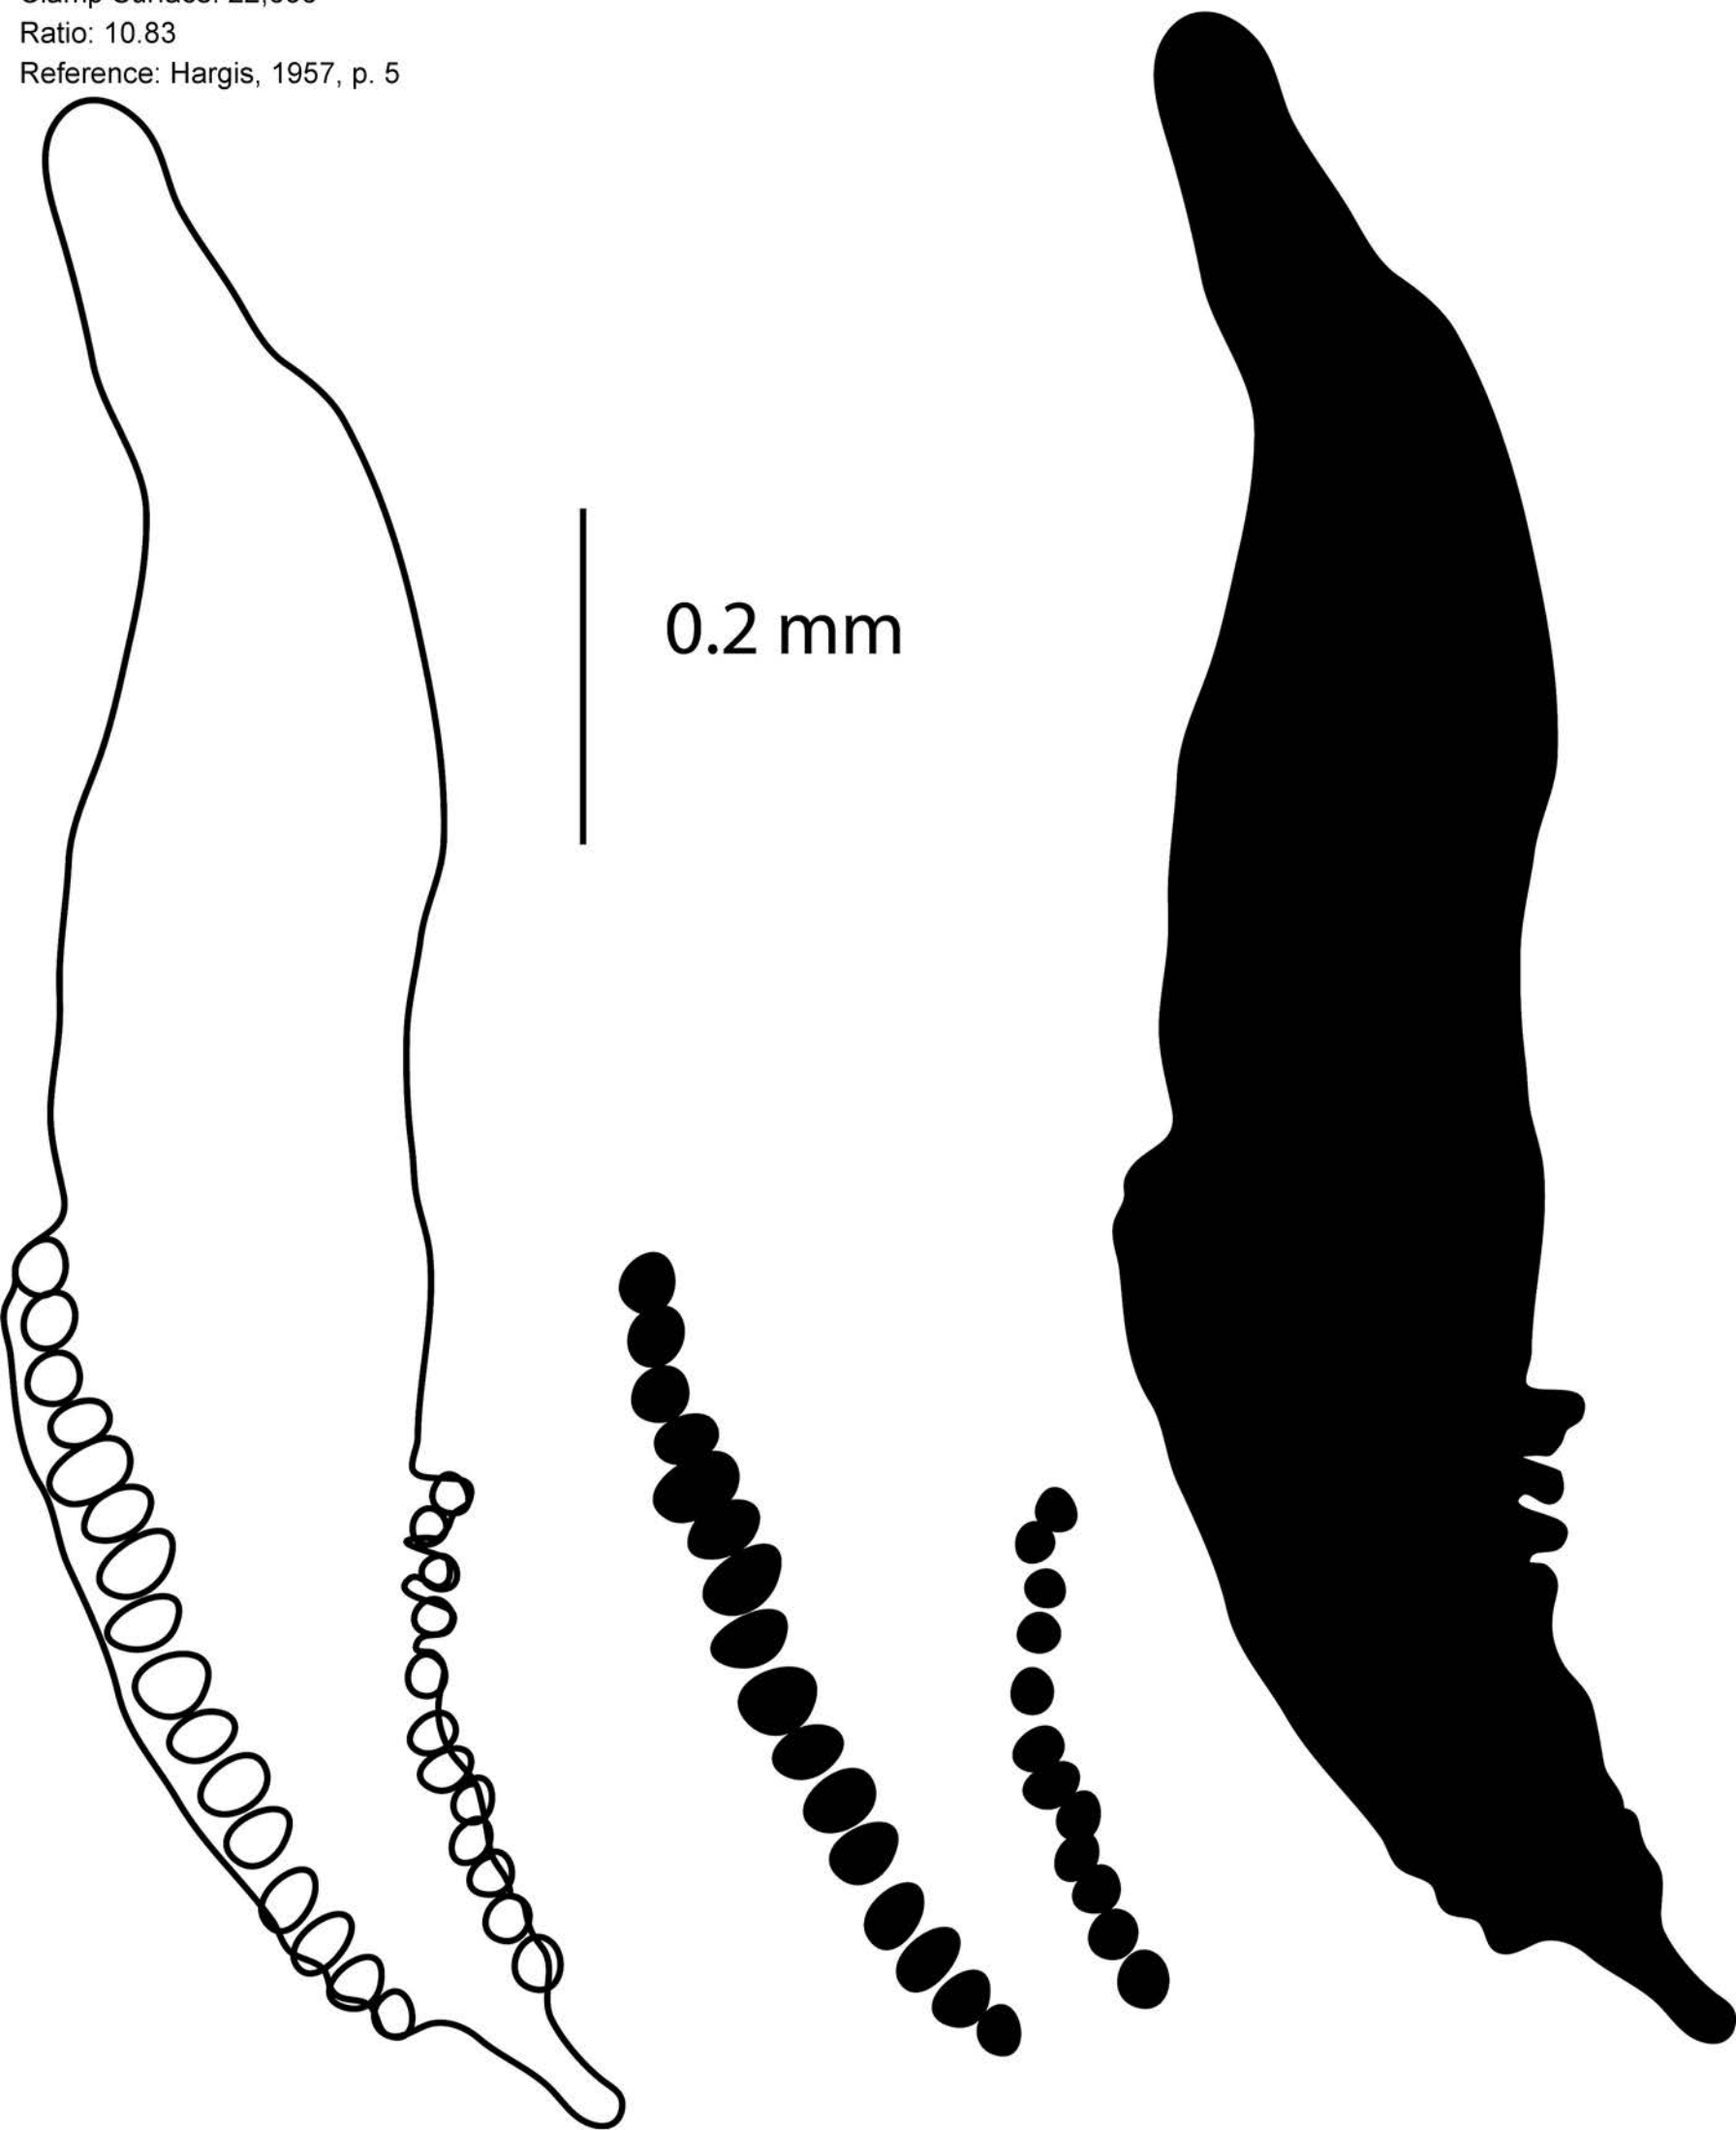

Family: Gastrocotylidae  
Species: *Areotestis sibi* Yamaguti, 1965  
Body Surface: 33,887,590  
Clamp Surface: 629,933  
Ratio: 1.86  
Reference: Yamaguti, 1965, p. 79

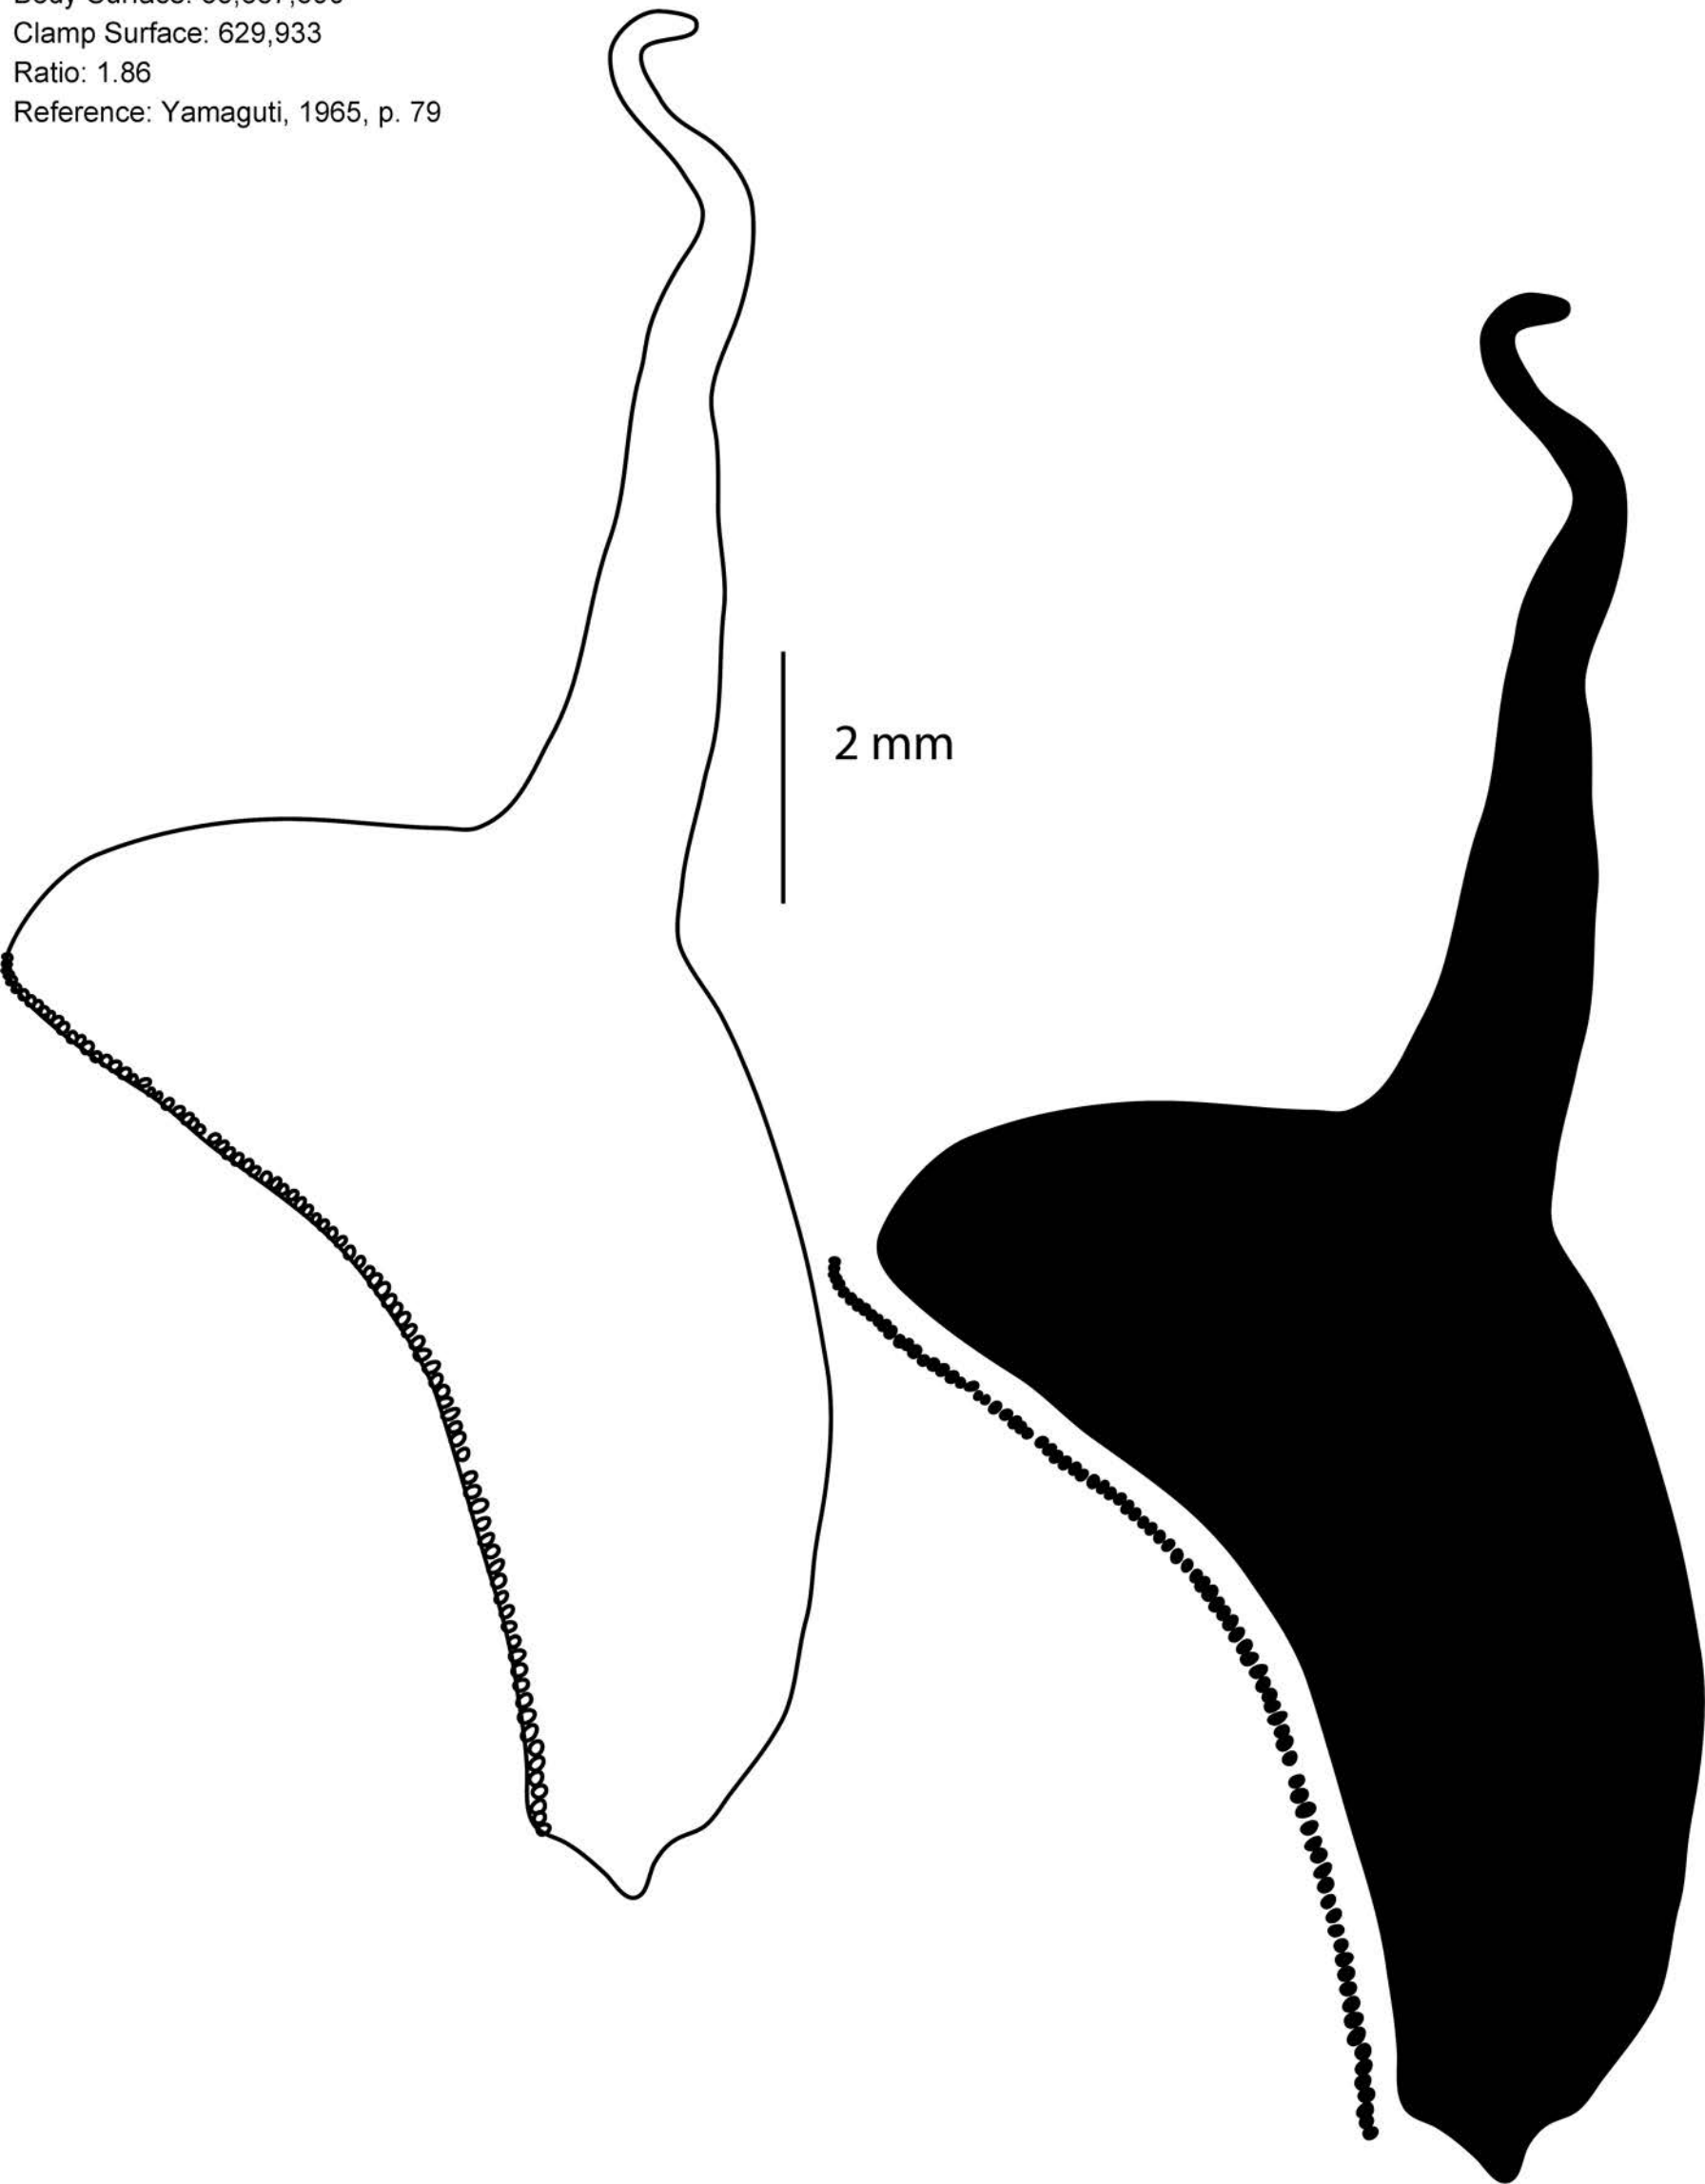

Family: Gastrocotylidae

Species: *Churavera macrova*

Unnithan, 1968

Body Surface: 2,844,619

Clamp Surface: 67,889

Ratio: 2.39

Reference: Pandey, 2008,

p. 368

1 mm

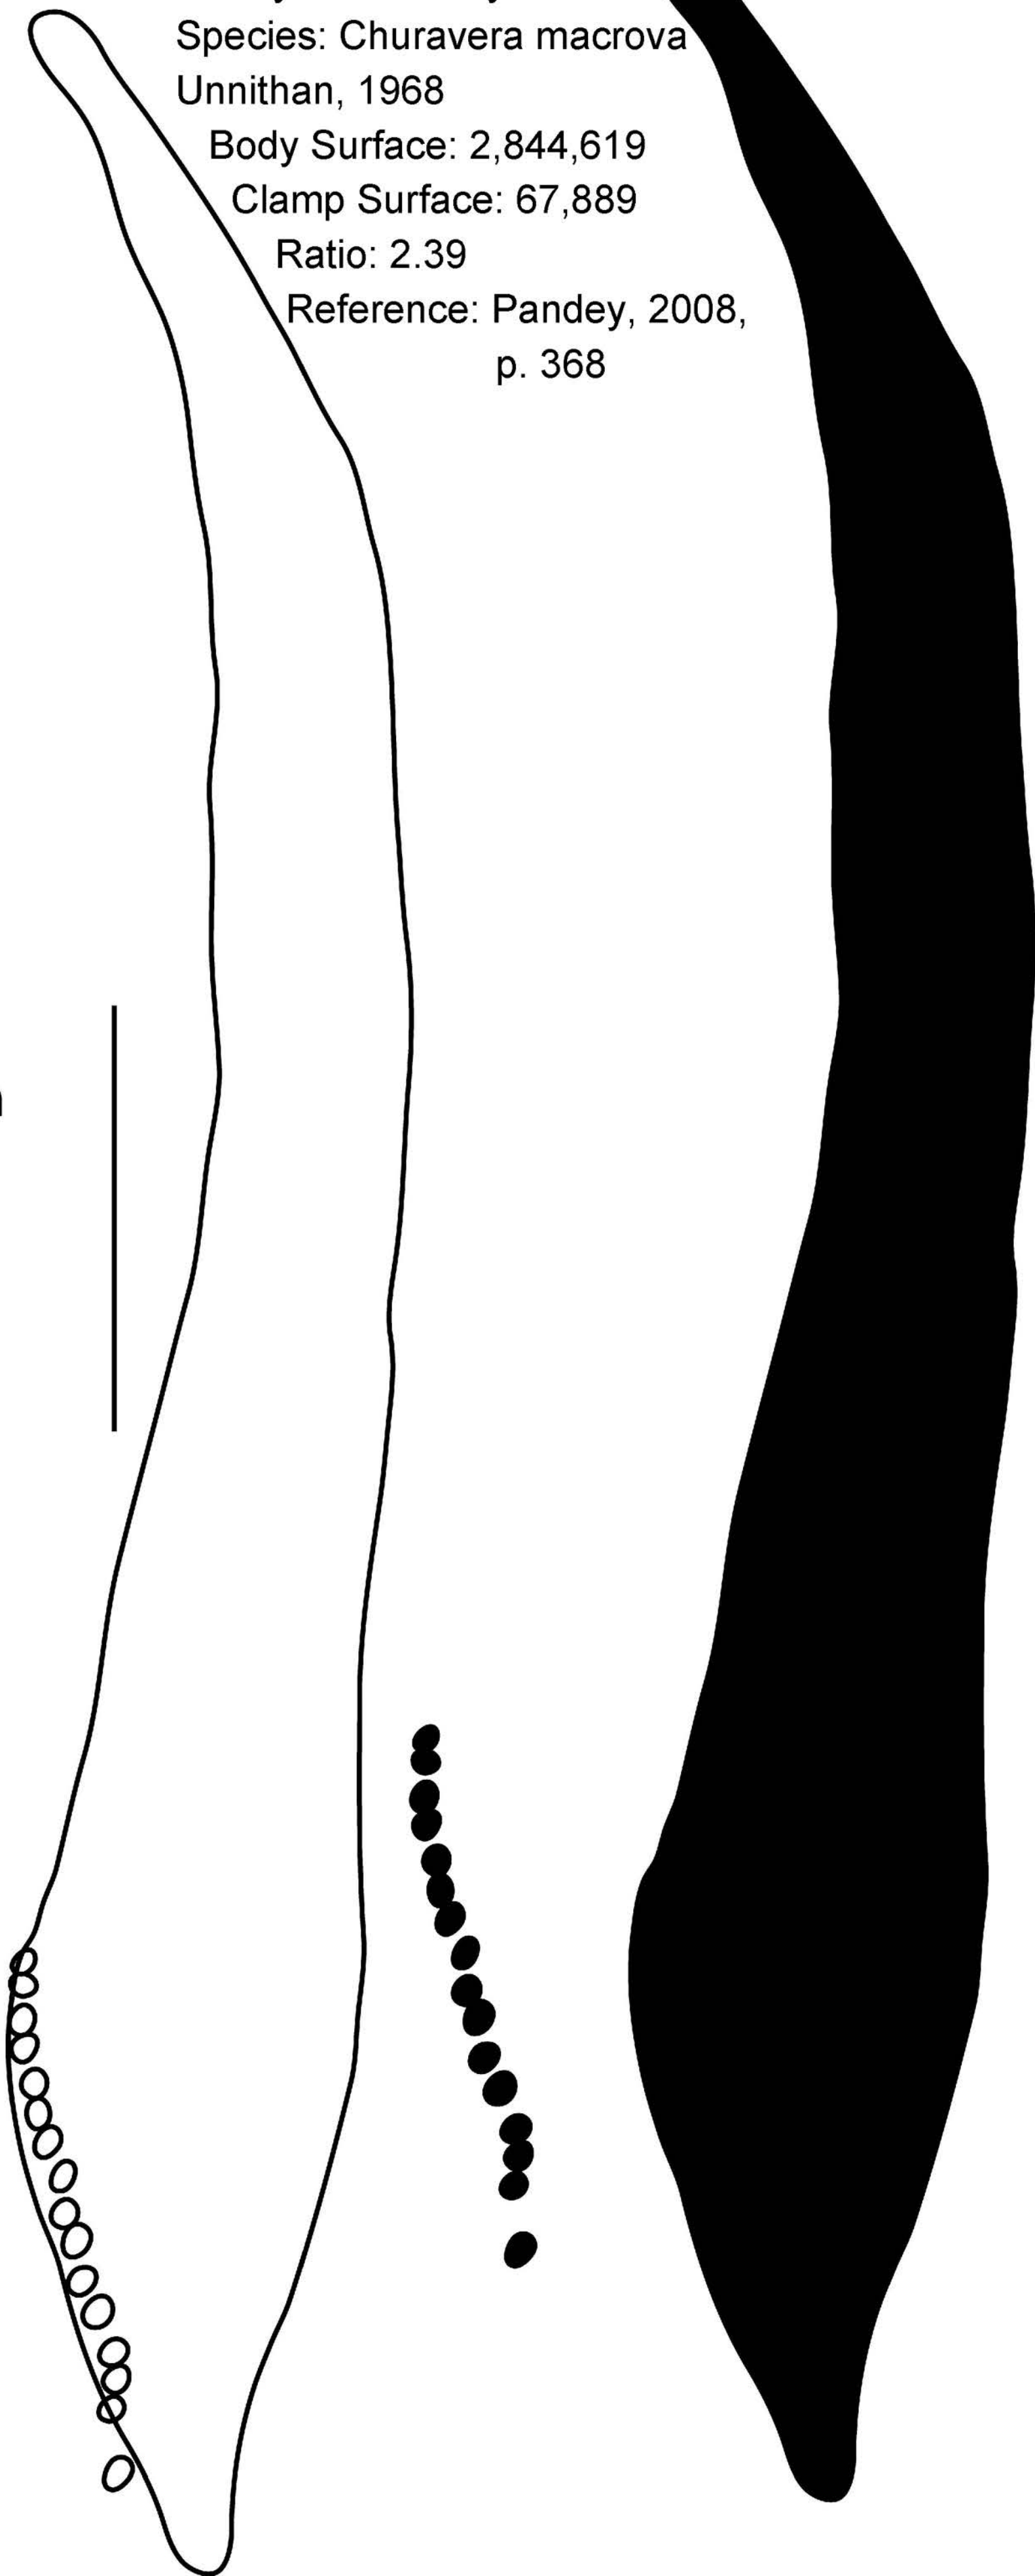

Family: Gastrocotylidae

Species: *Cypselurobranchitrema spilonopteri* Yamaguti, 1966

Body Surface: 204,576

Clamp Surface: 13,906

Ratio: 6.80

Reference: Yamaguti, 1966, p. 432

0.2 mm

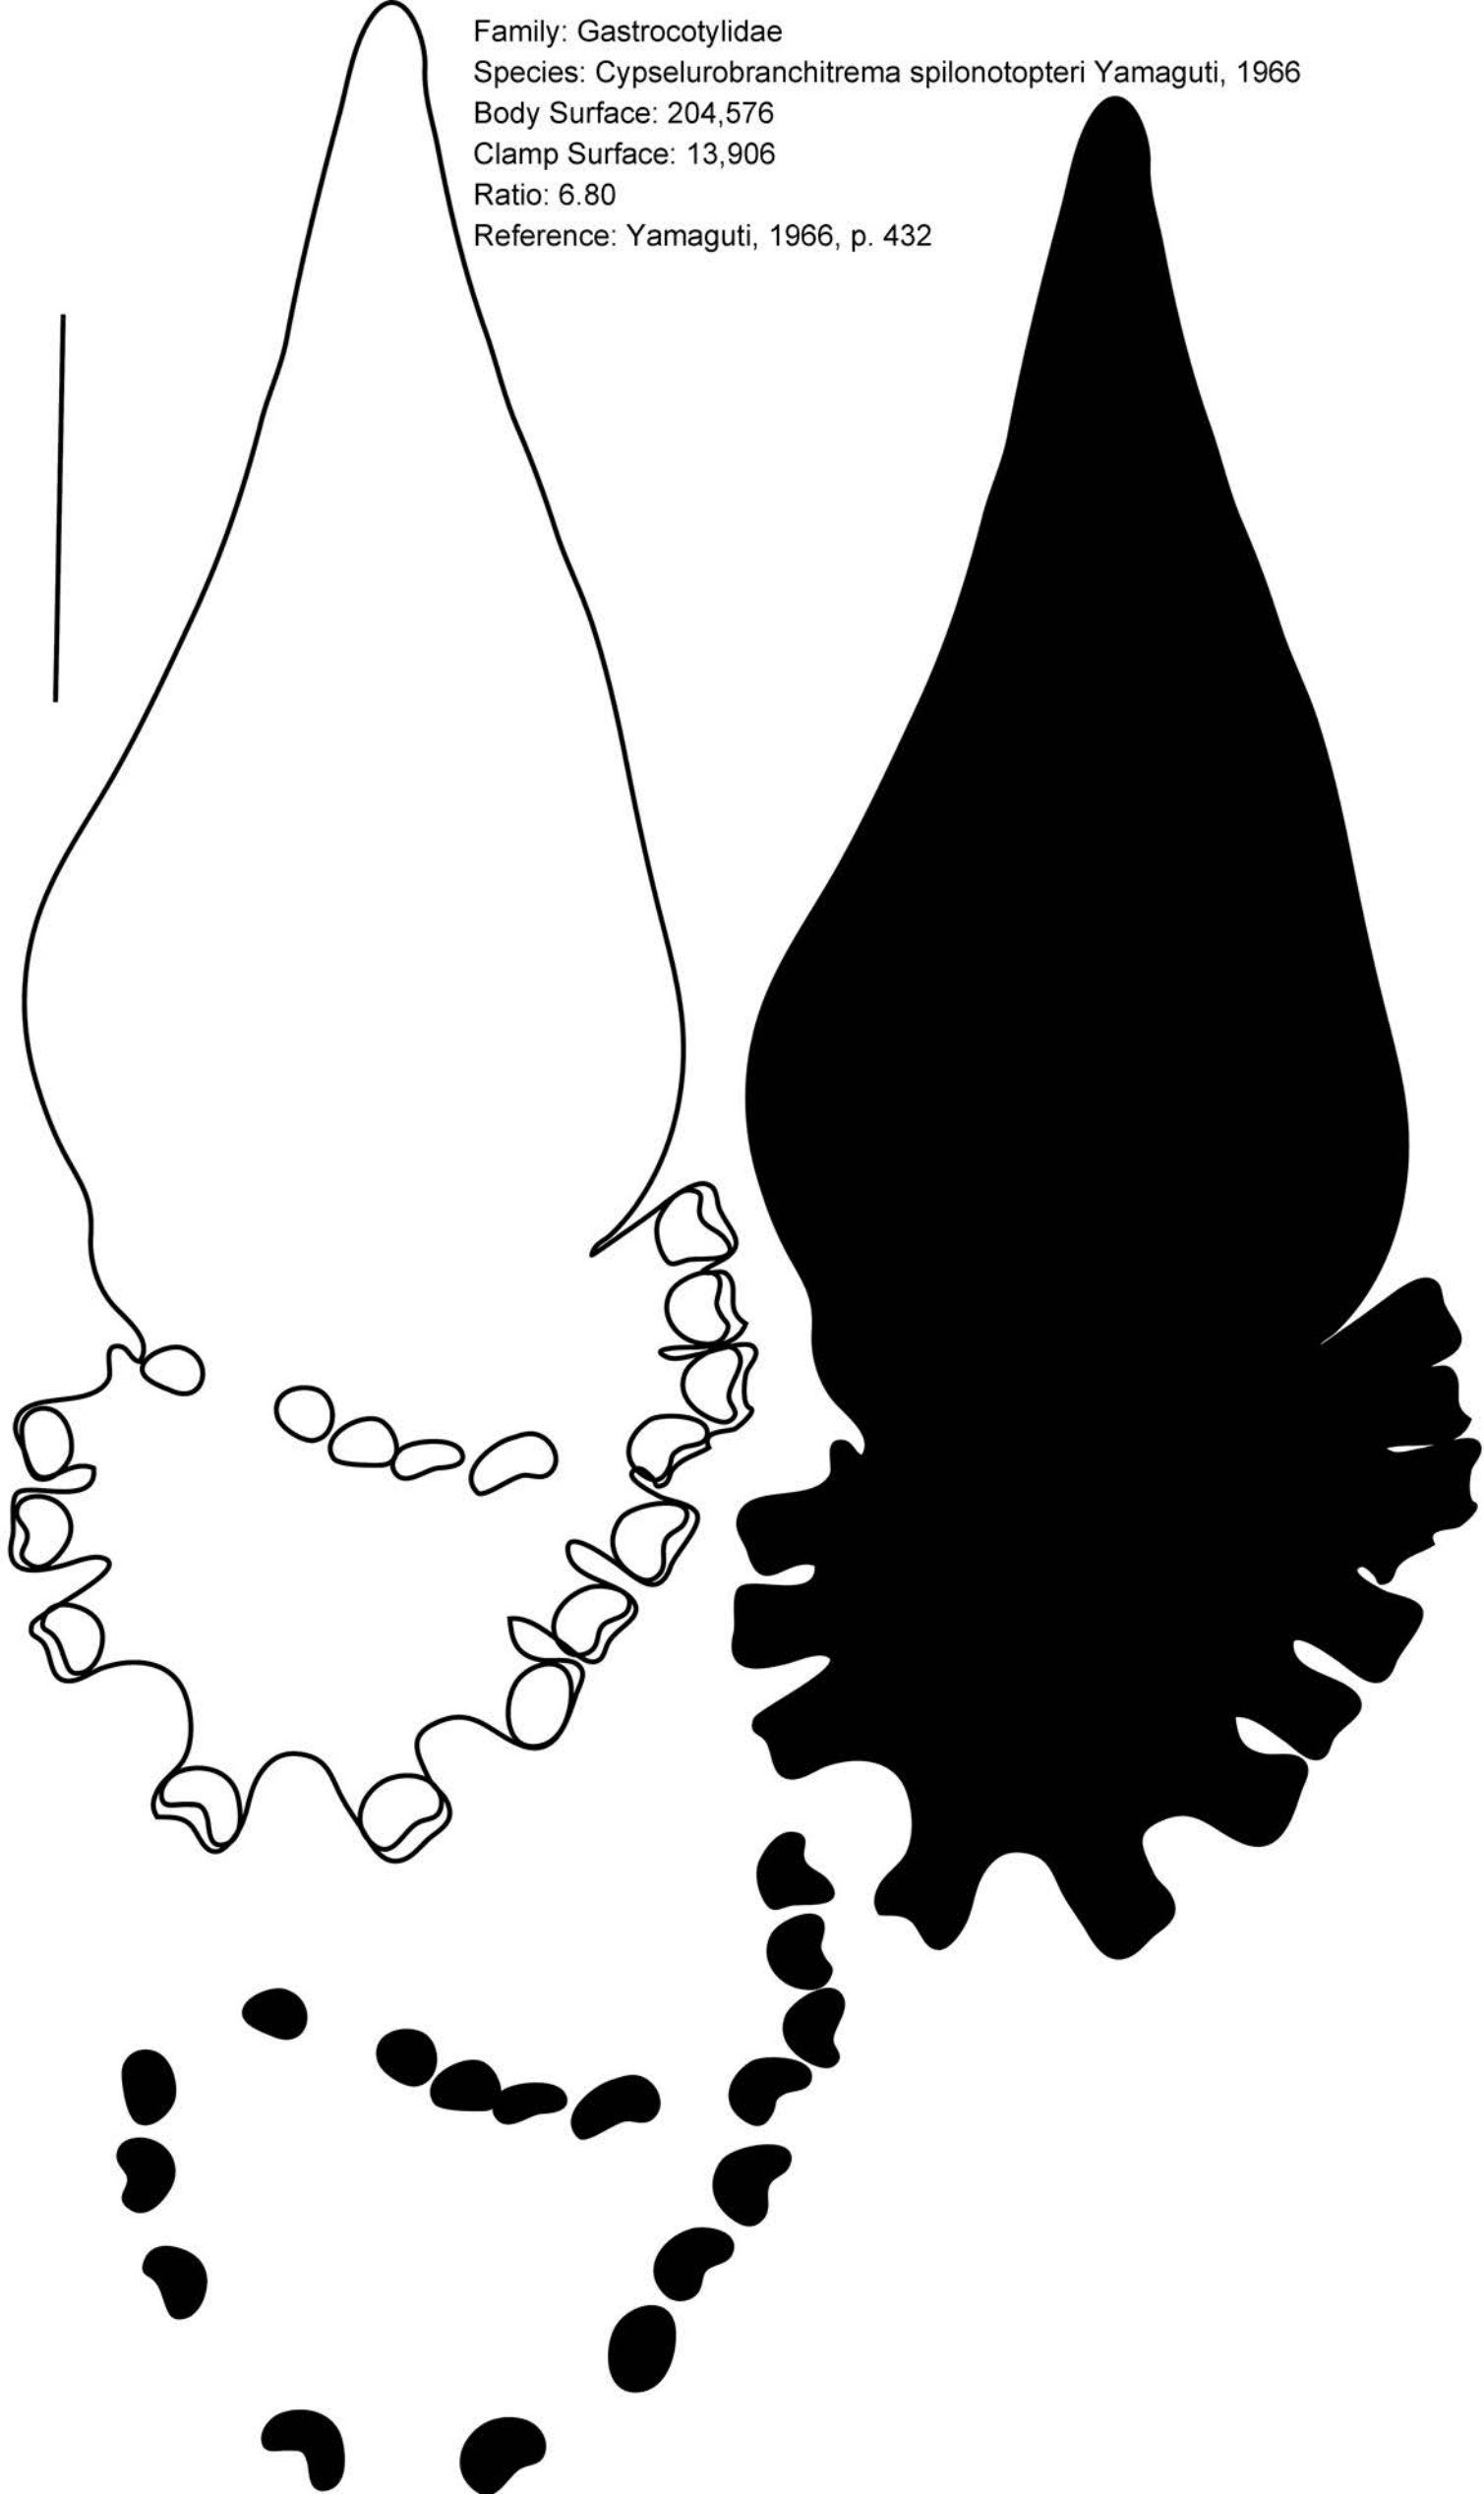

Family: Gastrocotylidae

Species: *Engraulicola forcepopensis*

George, 1960

Body Surface: 303,387

Clamp Surface: 3,117

Ratio: 4.32

Reference: Pandey, 2008, p. 366

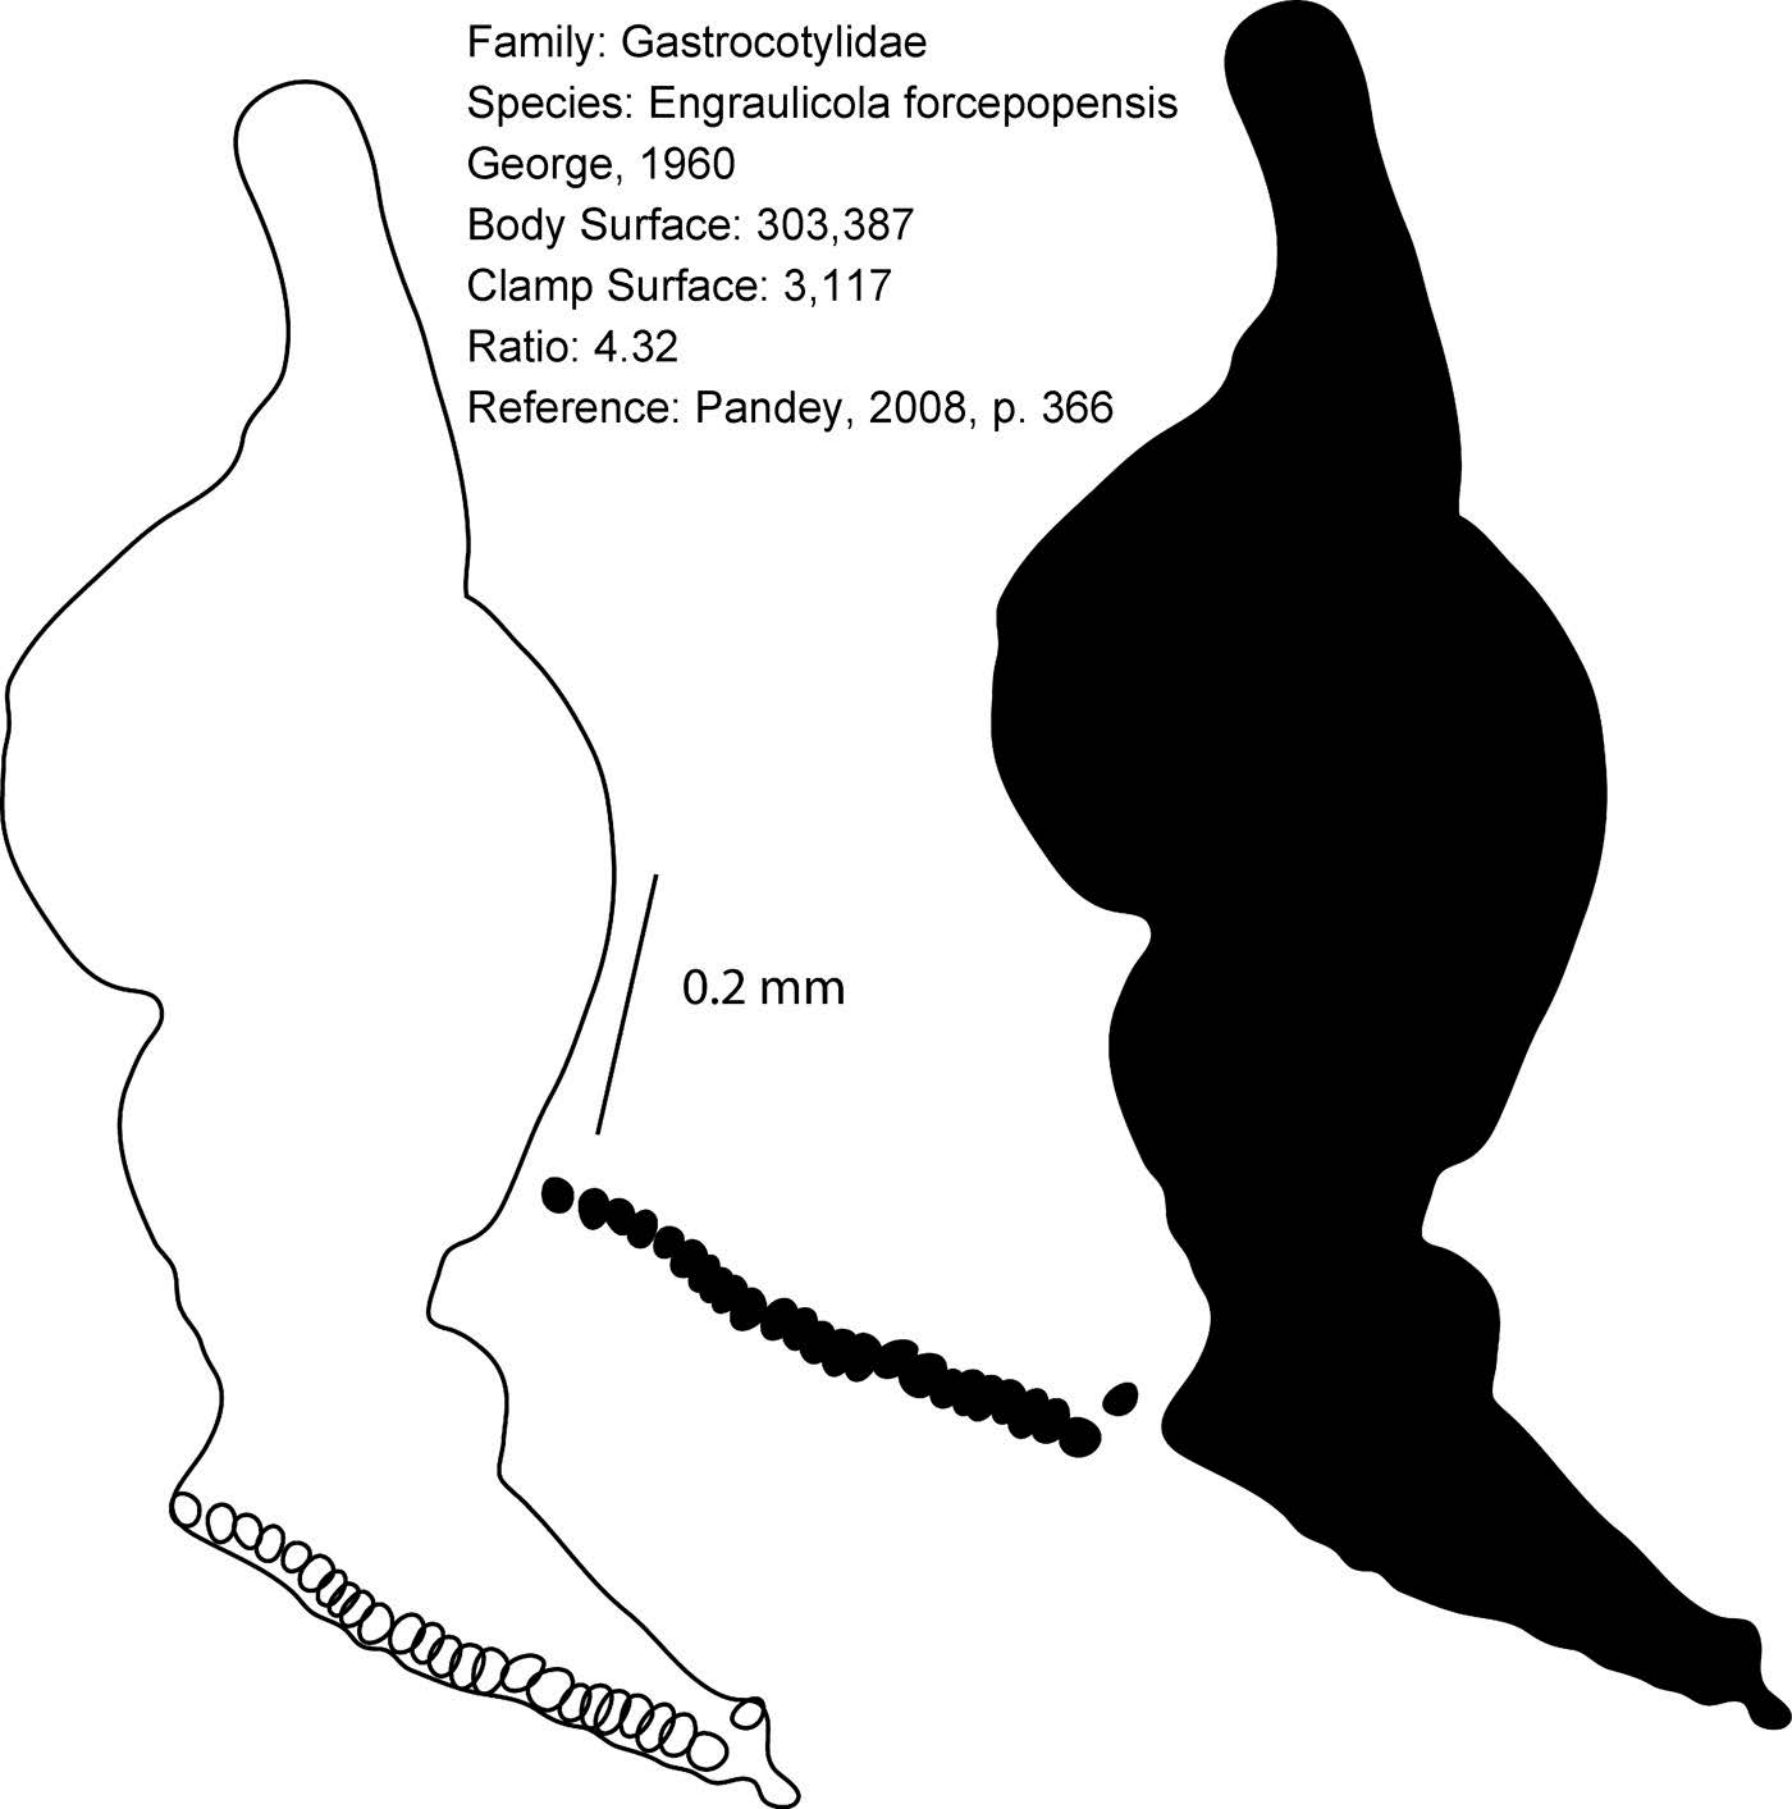

Family: Gastrocotylidae

Species: *Engraulicola micropharyngella* Unnithan, 1967

Body Surface: 293,283

Clamp Surface: 12,295

Ratio: 4.19

Reference: Unnithan, 1967, p. 212

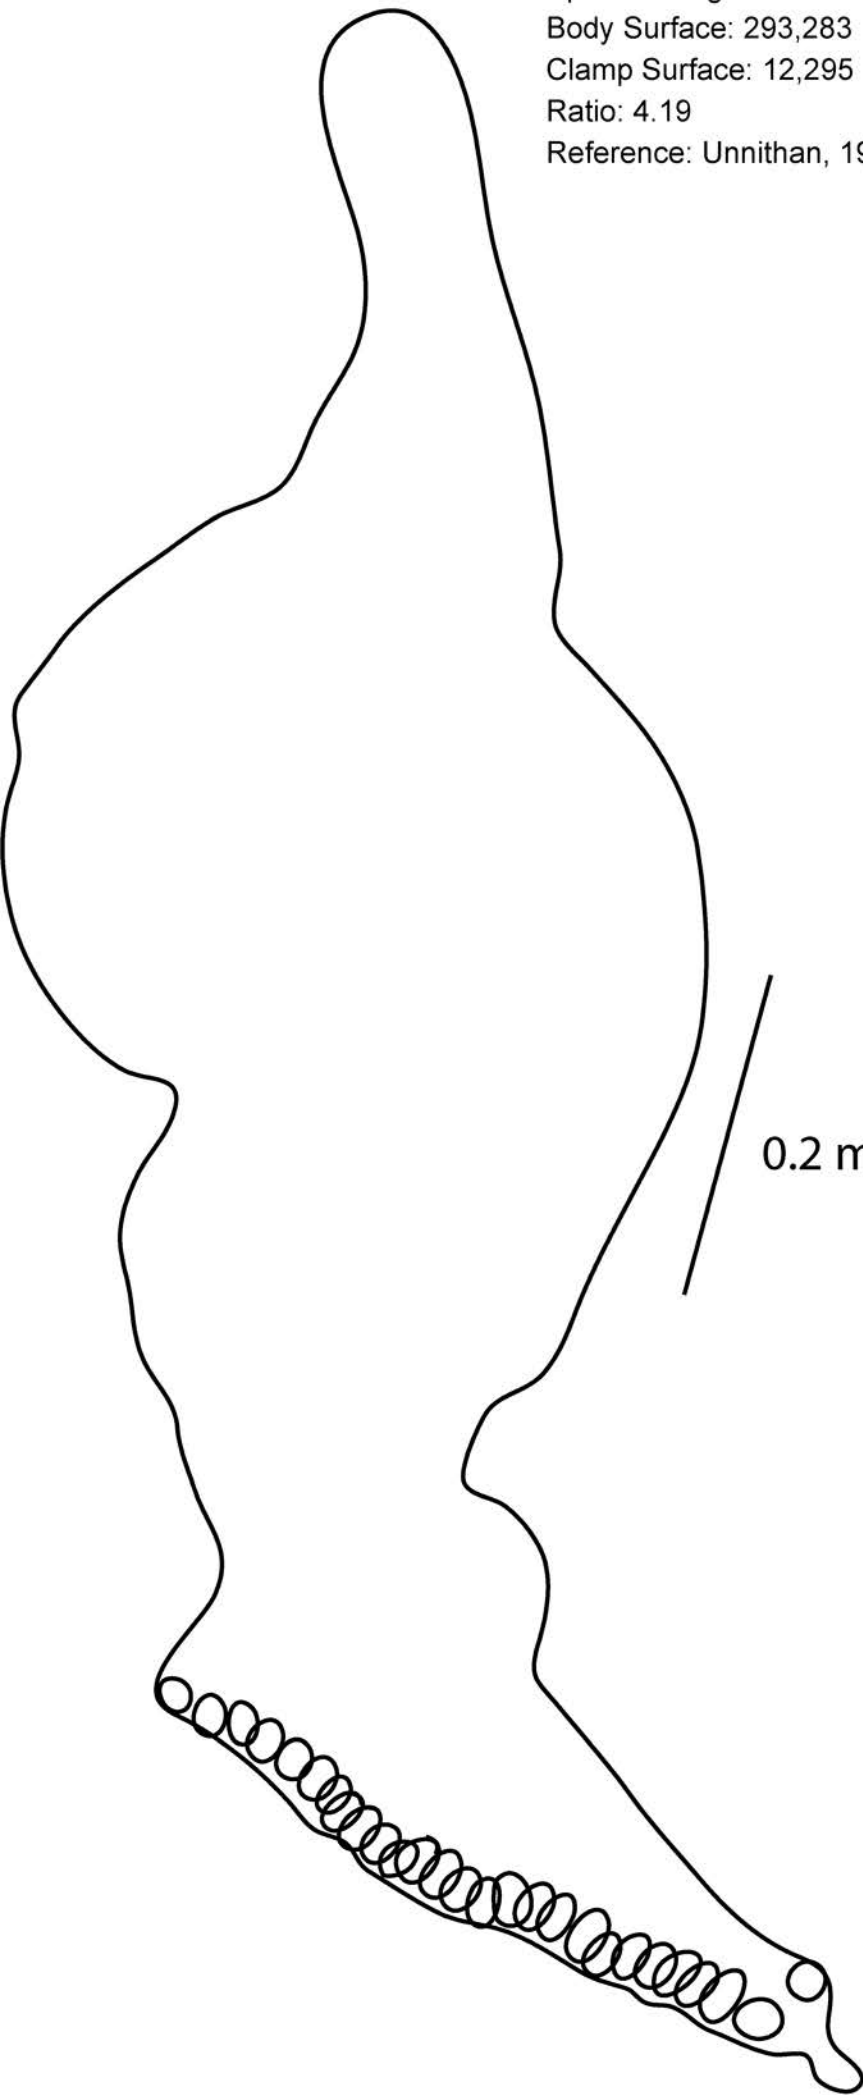

0.2 mm

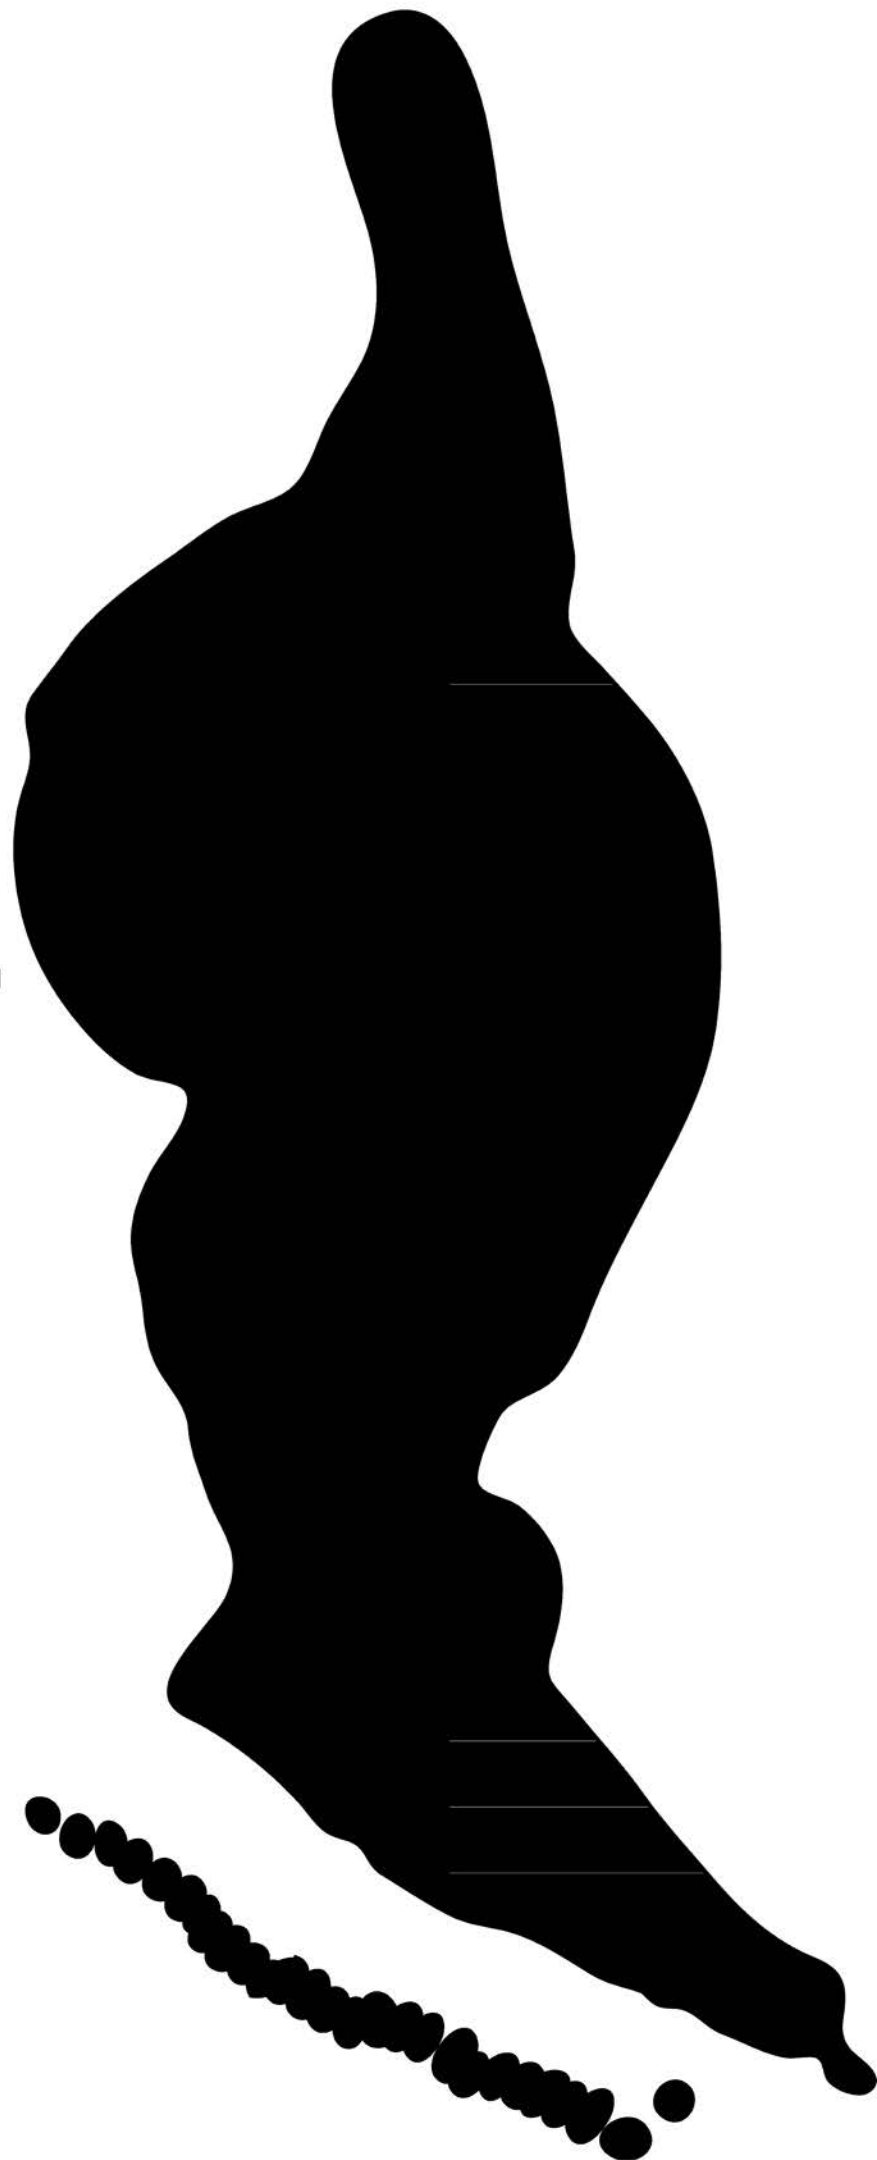

Family: Gastrocotylidae

Species: *Engraulicola thrissocles* (Tripathi, 1959) Lebedev, 1971

Body Surface: 1,014,407

Clamp Surface: 69,075

Ratio: 6.81

Reference: Lebedev, 1986, p. 70

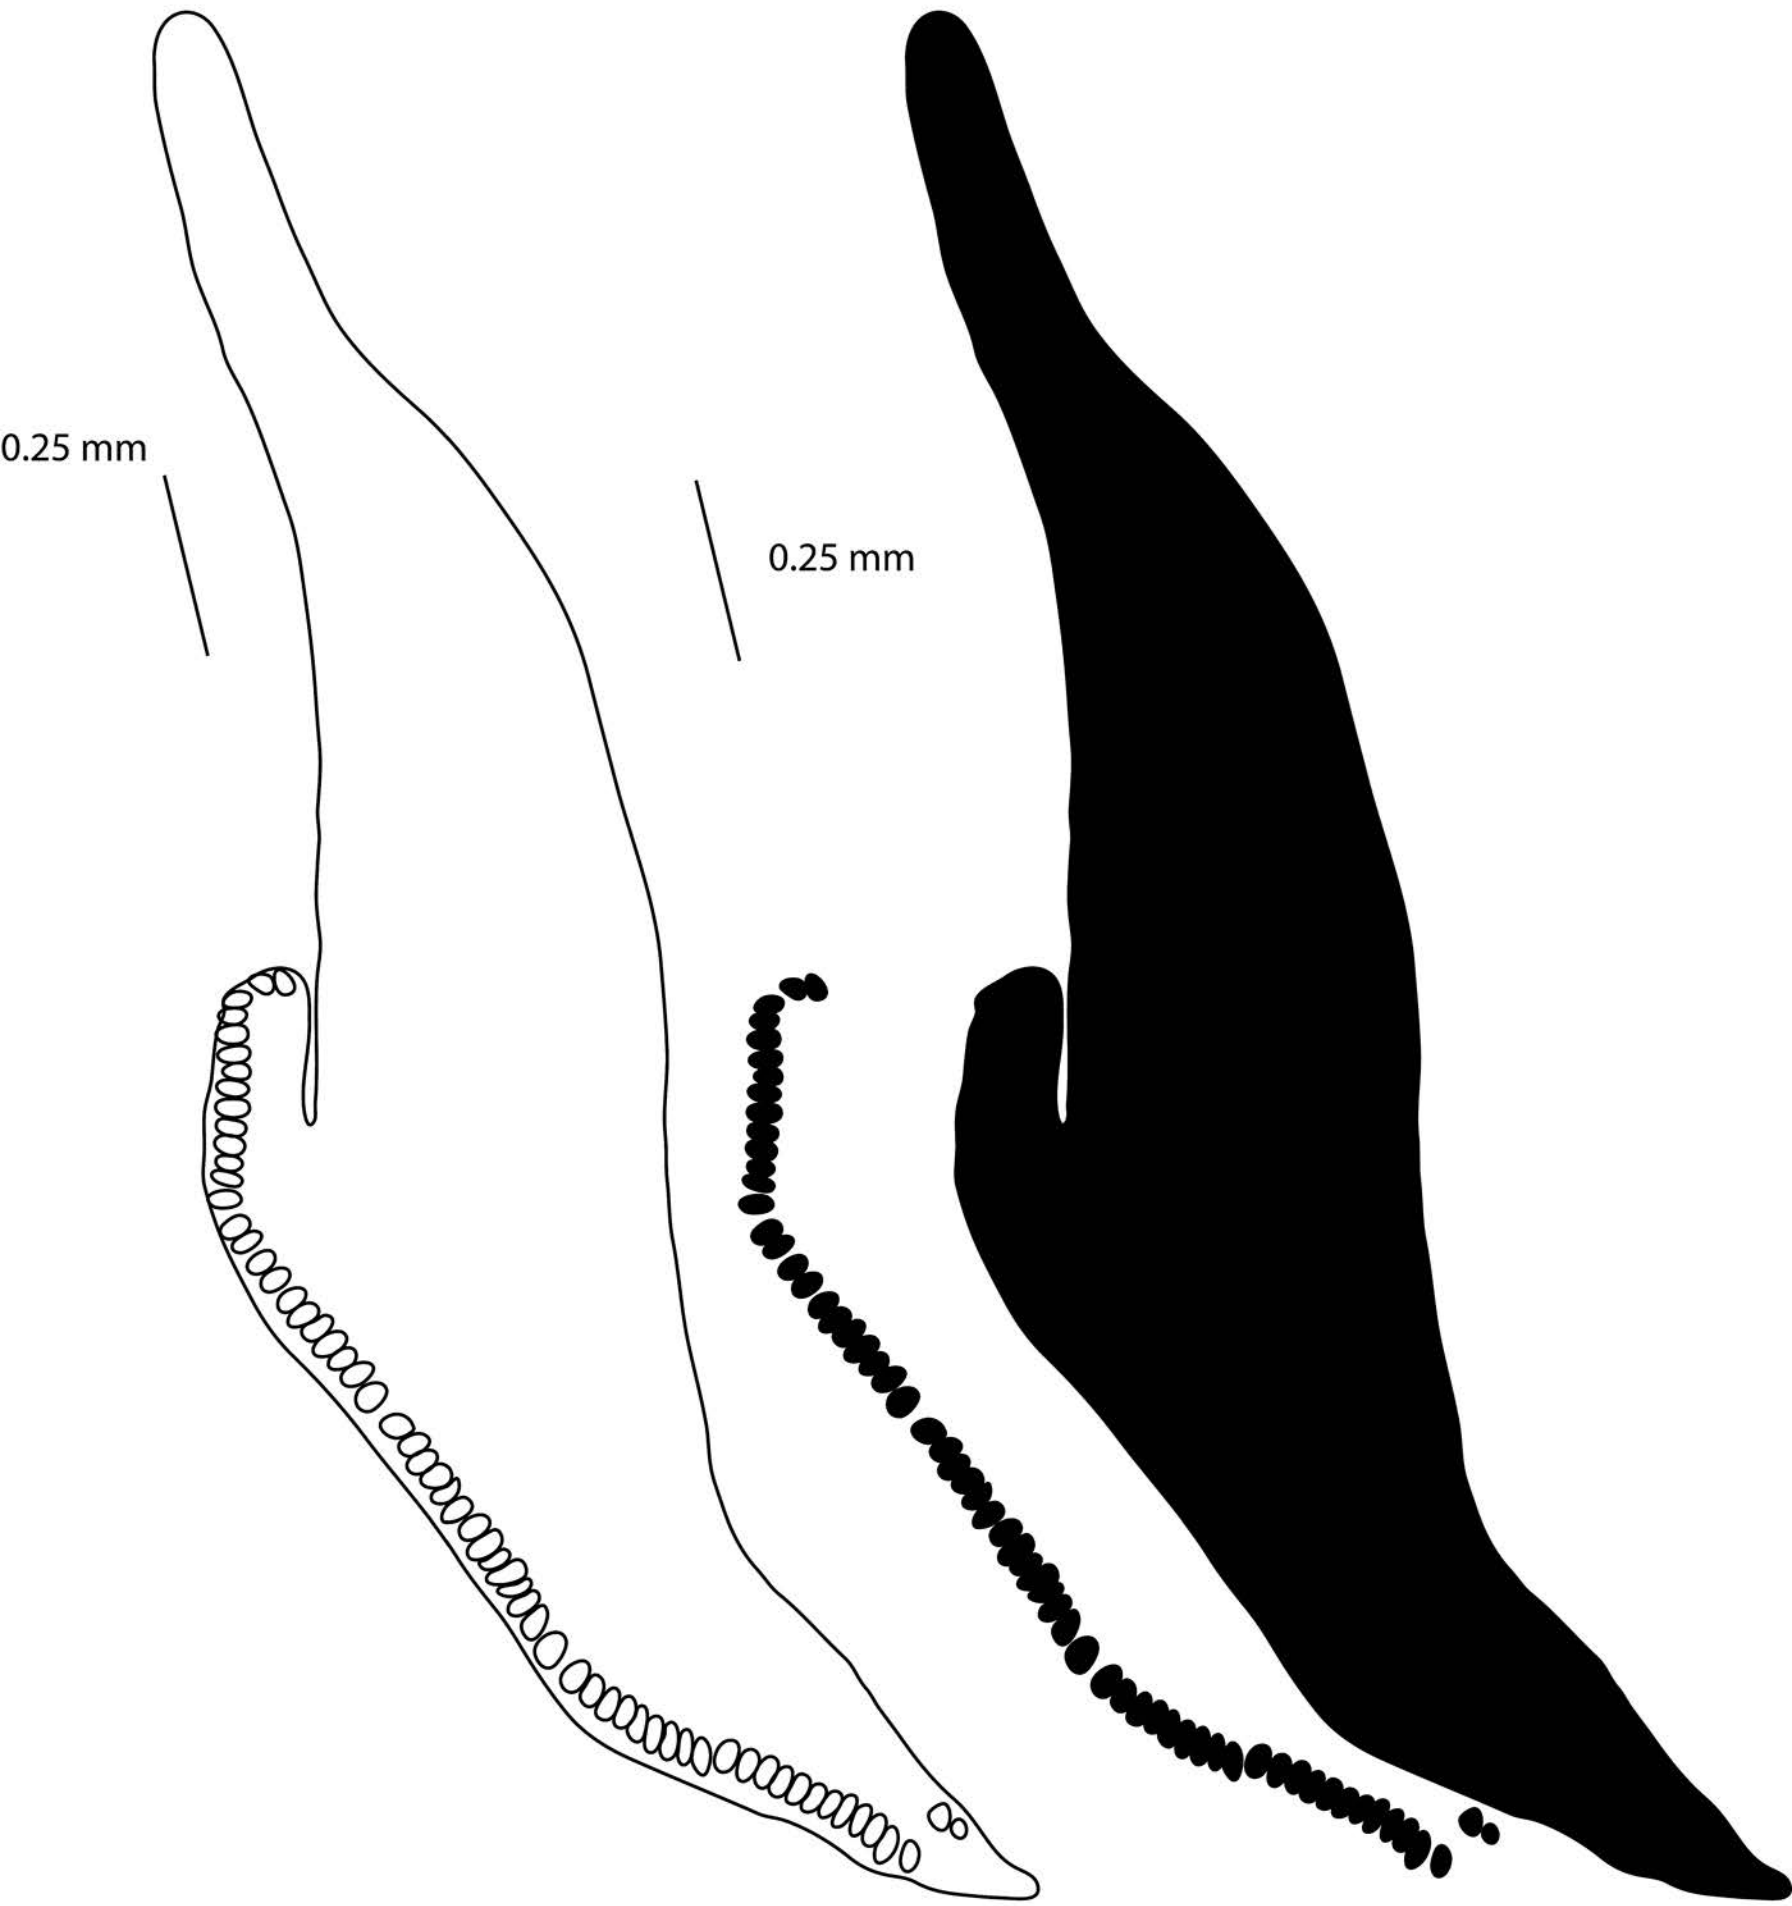



Family: Gastrocotylidae  
species: *Engrauliphila grex* Unnithan, 1967  
Body Surface: 208,190  
Clamp Surface: 24,488  
Ratio: 11.76  
Reference: Unnithan, 1967, p. 218

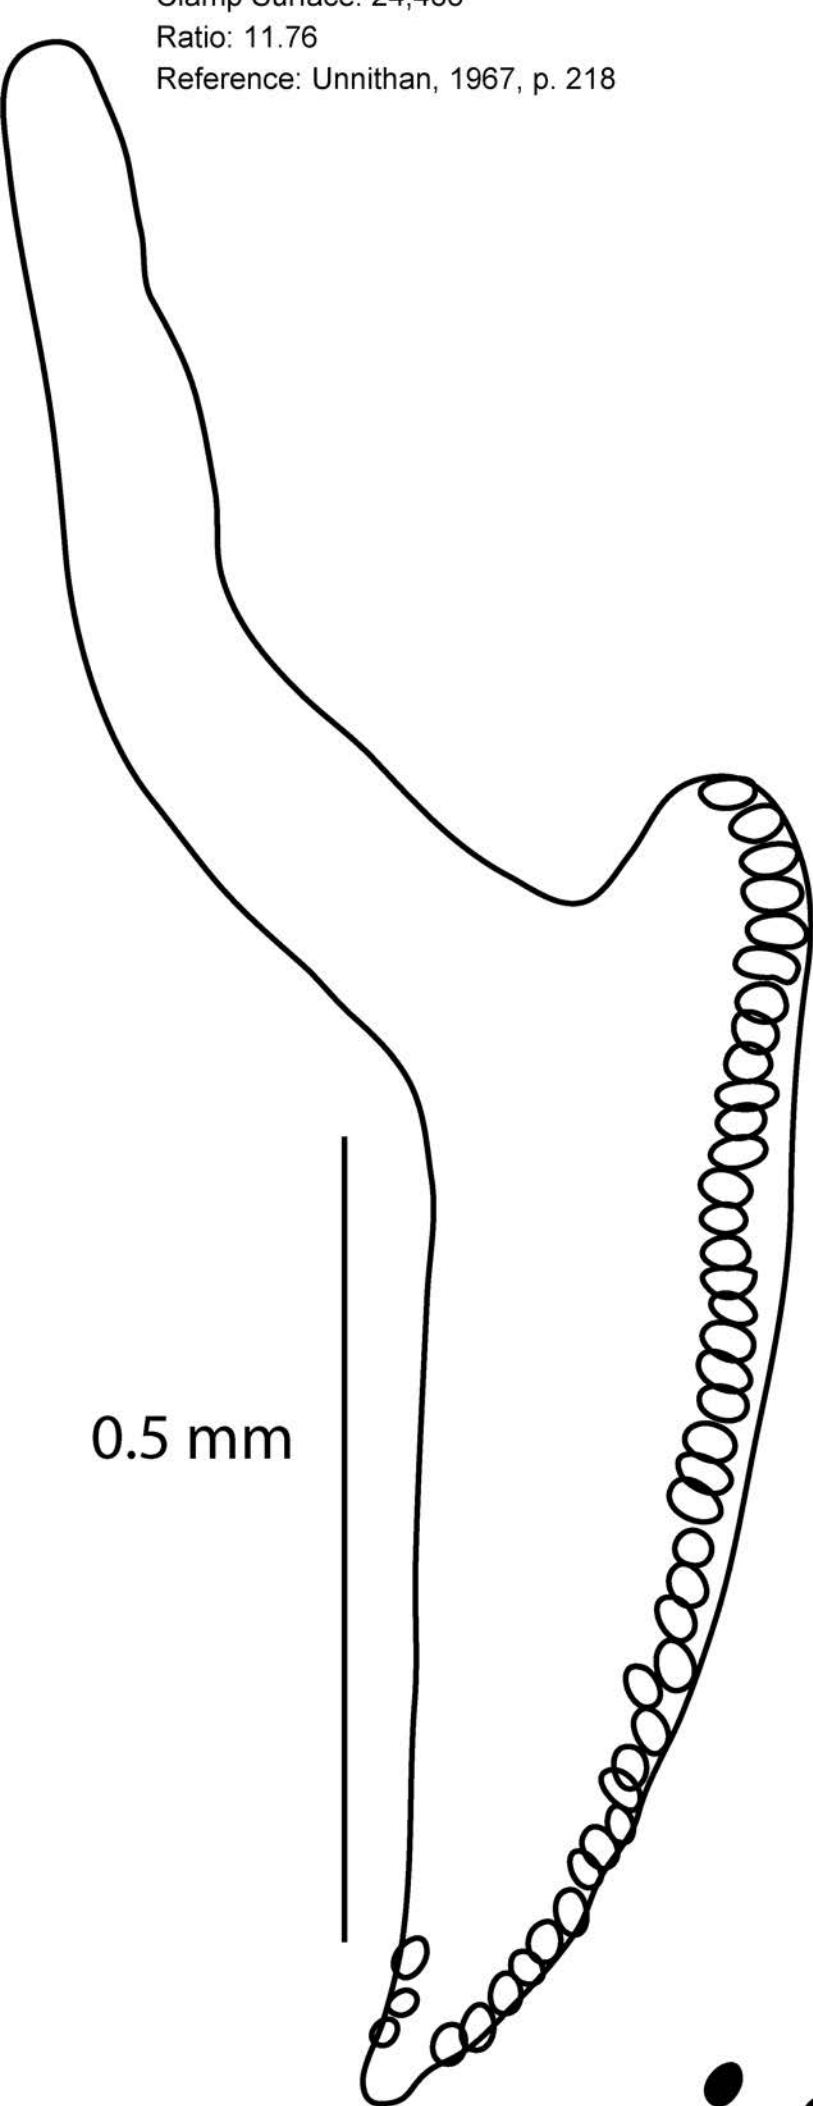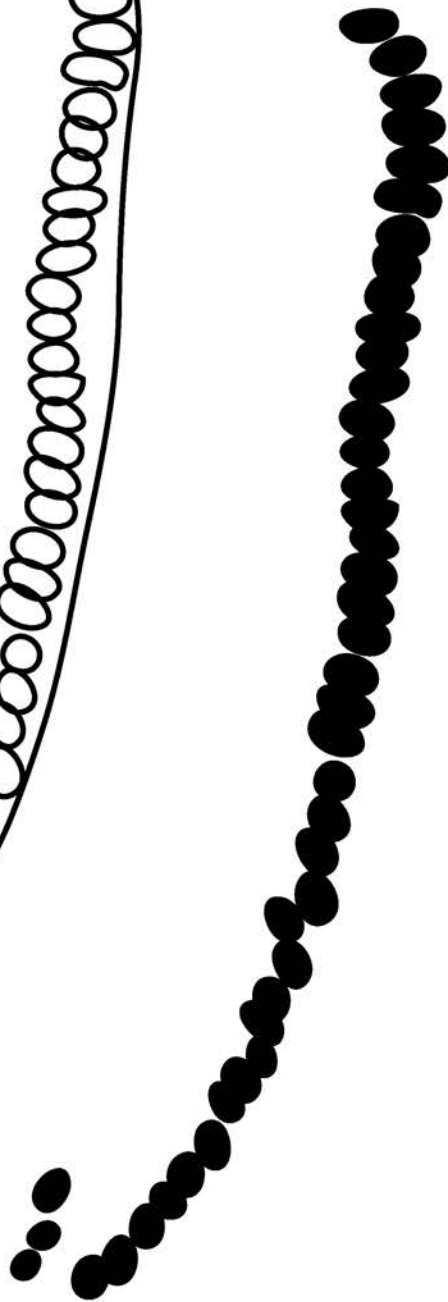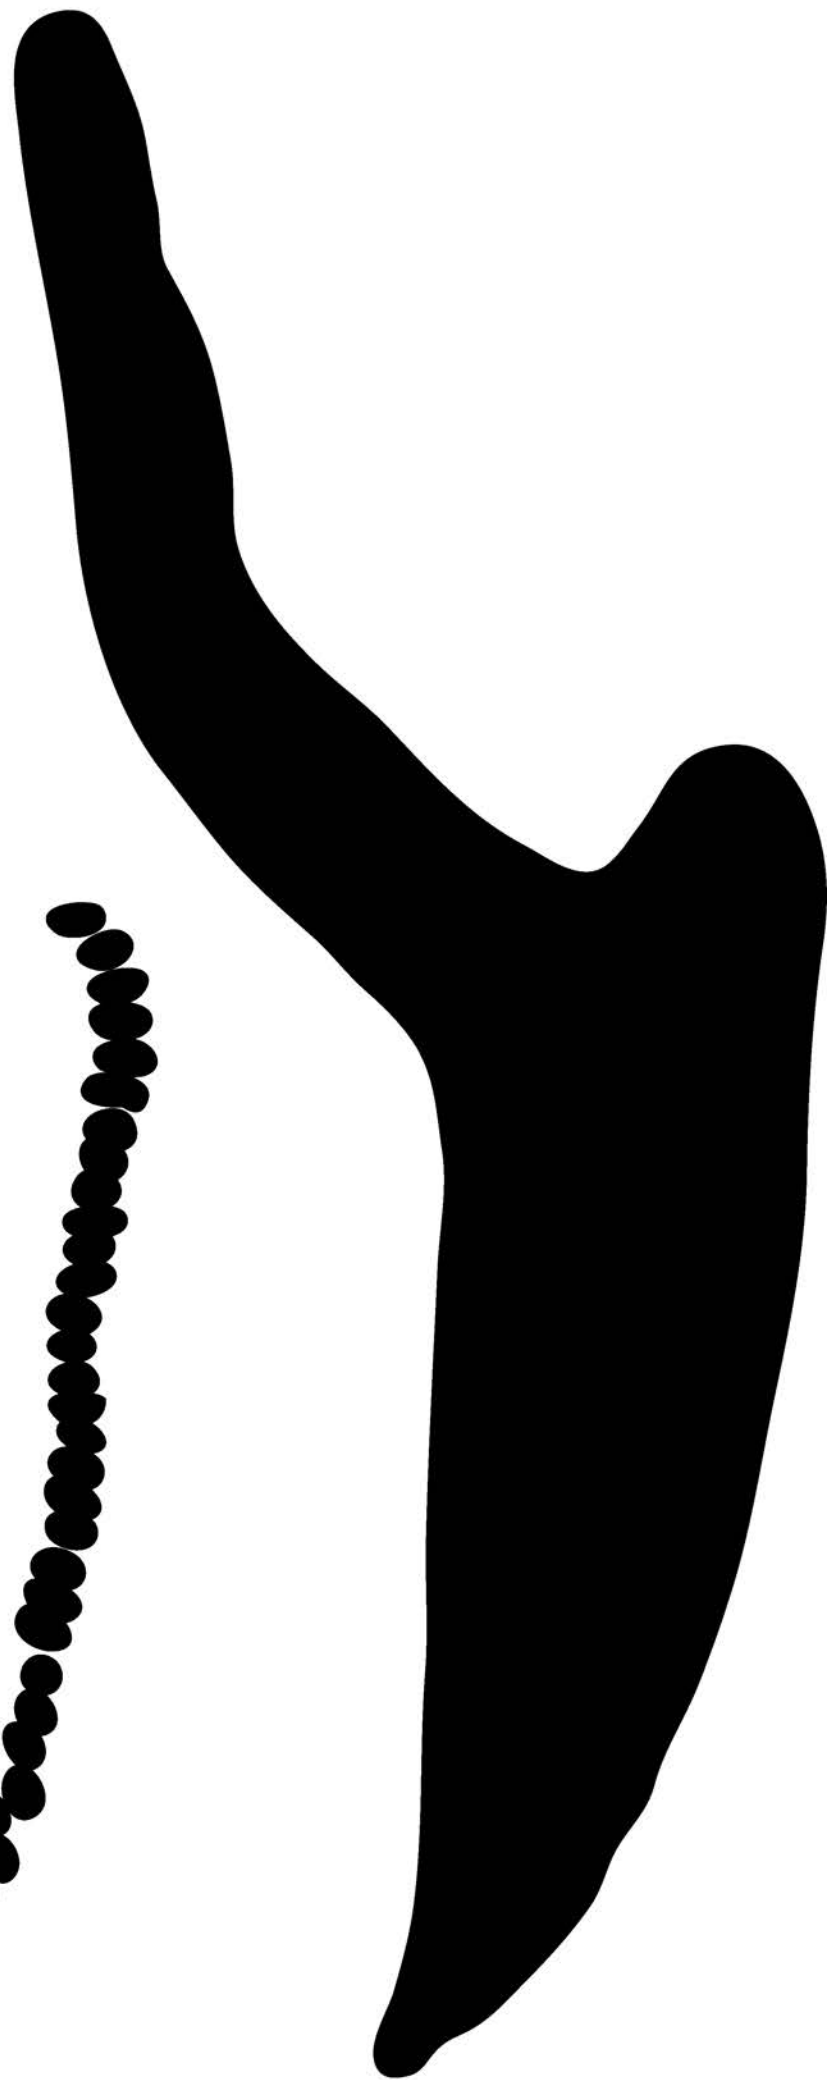

Family: Gastrocotylidae  
Species: *Engrauliscobina triaptella* Unnithan, 1967  
Body Surface: 1,465,577  
Clamp Surface: 91,211  
Ratio: 6.22  
Reference: Unnithan, 1967, p. 221

1 mm

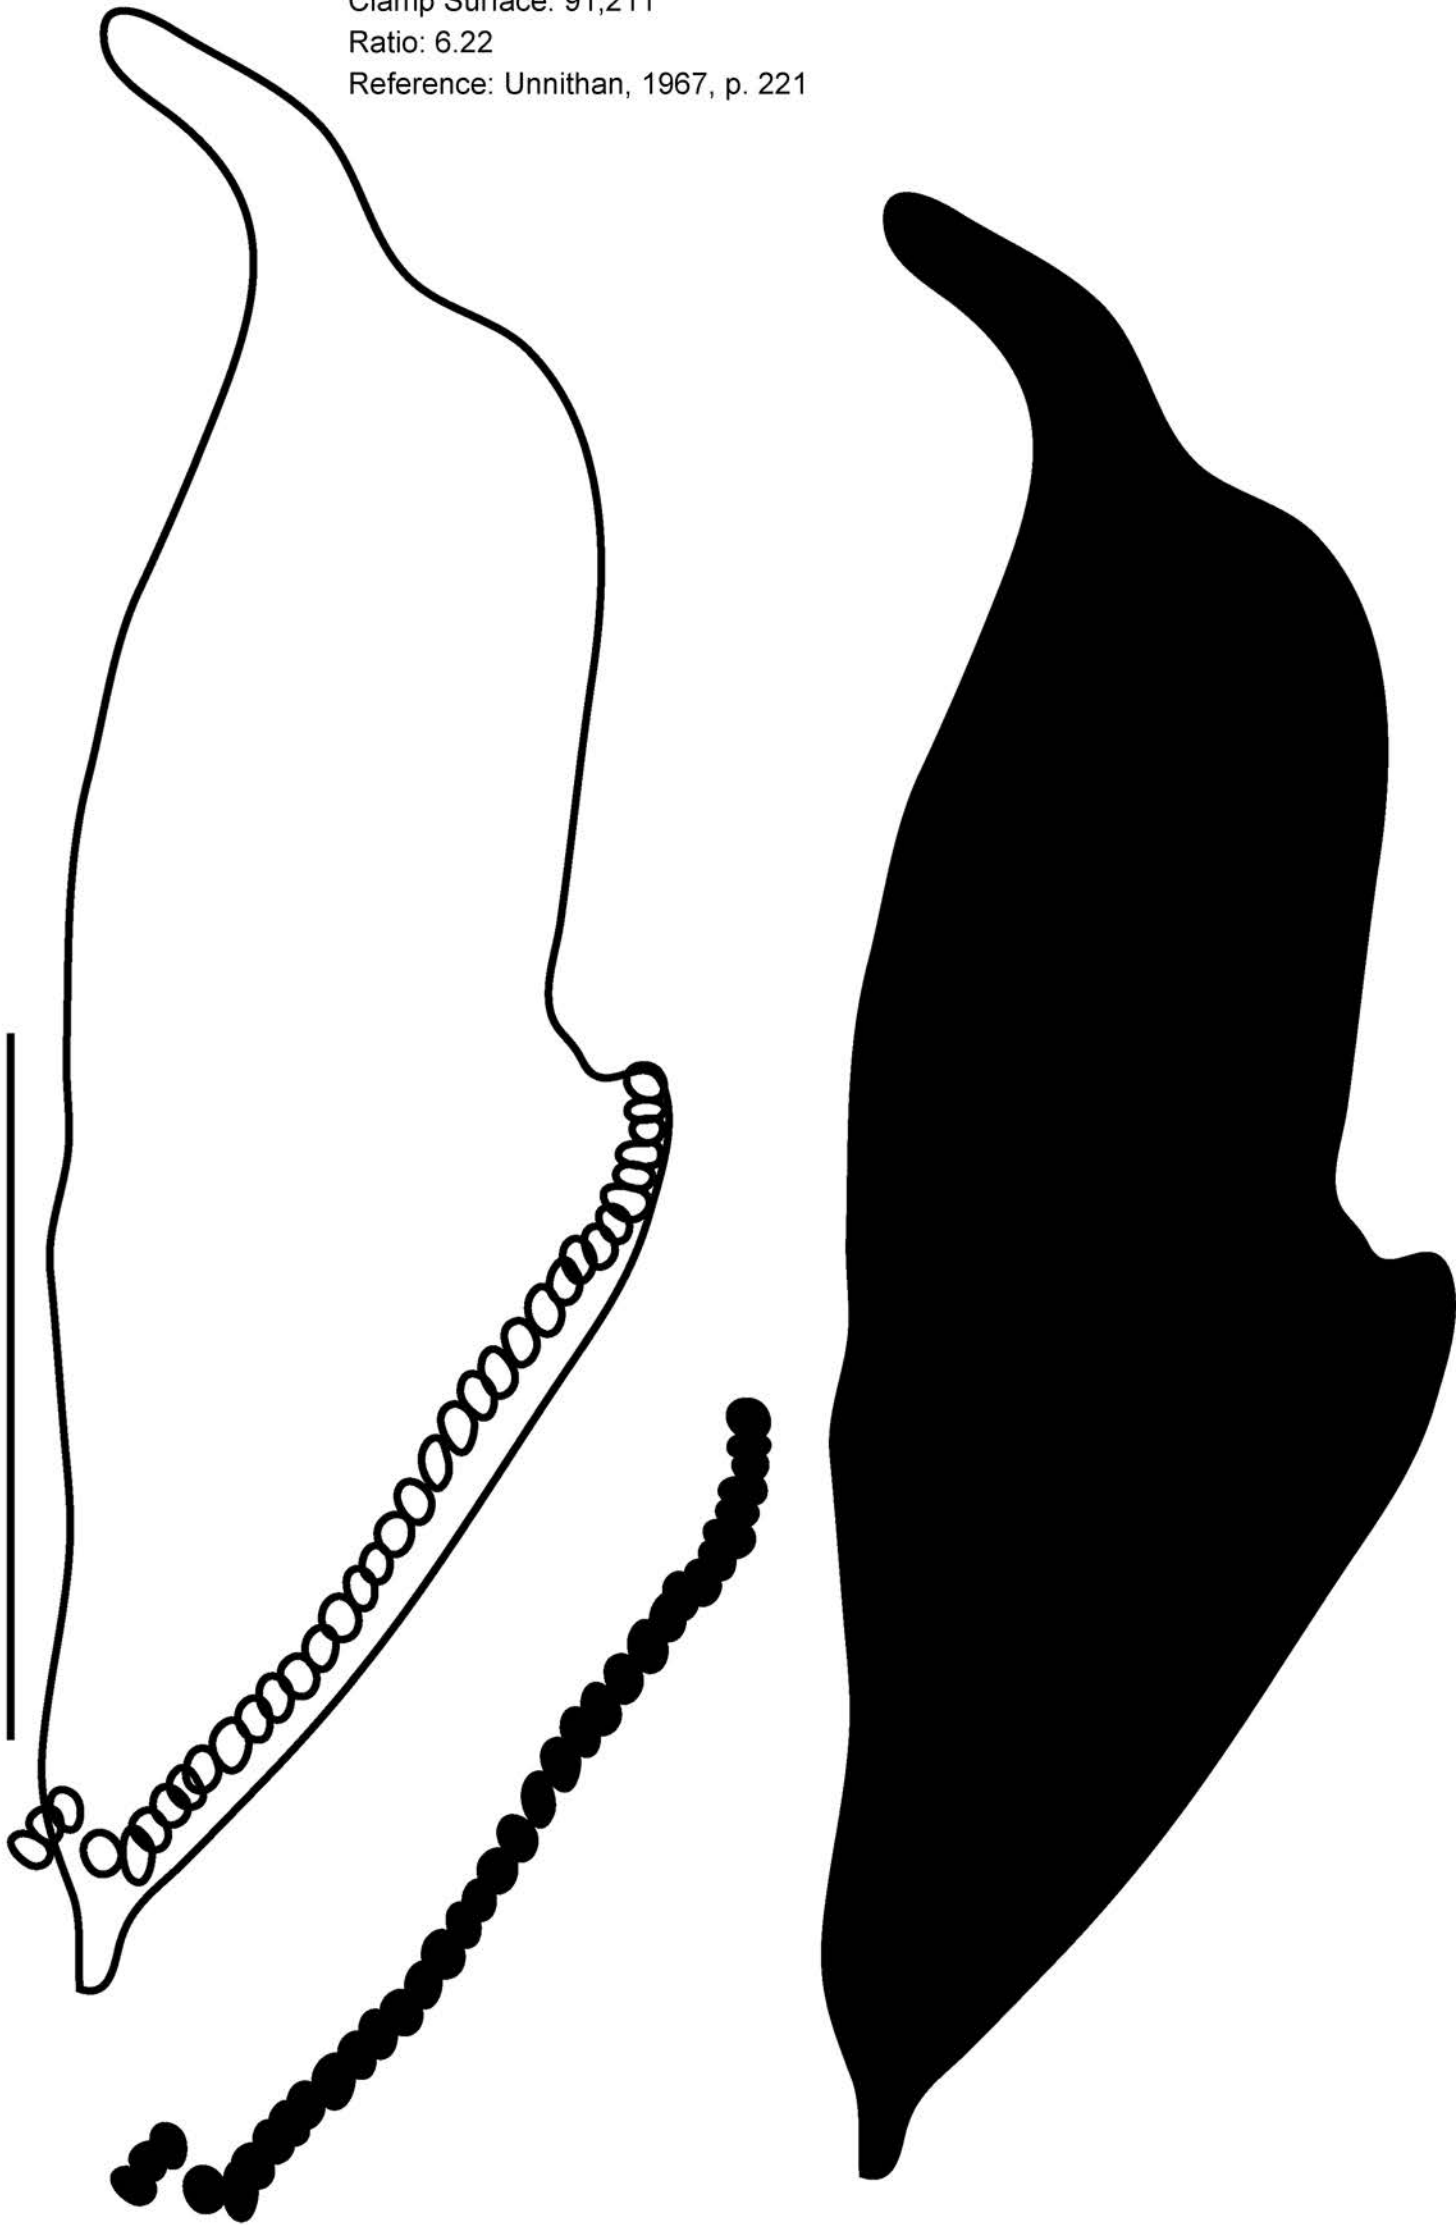

Family: Gastrocotylidae  
Species: *Engraulixenus malabaricus* Unnithan, 1967  
Body Surface: 556,699  
Clamp Surface: 56,562  
Ratio: 10.16  
Reference: Unnithan, 1967, p. 215

0.5 mm

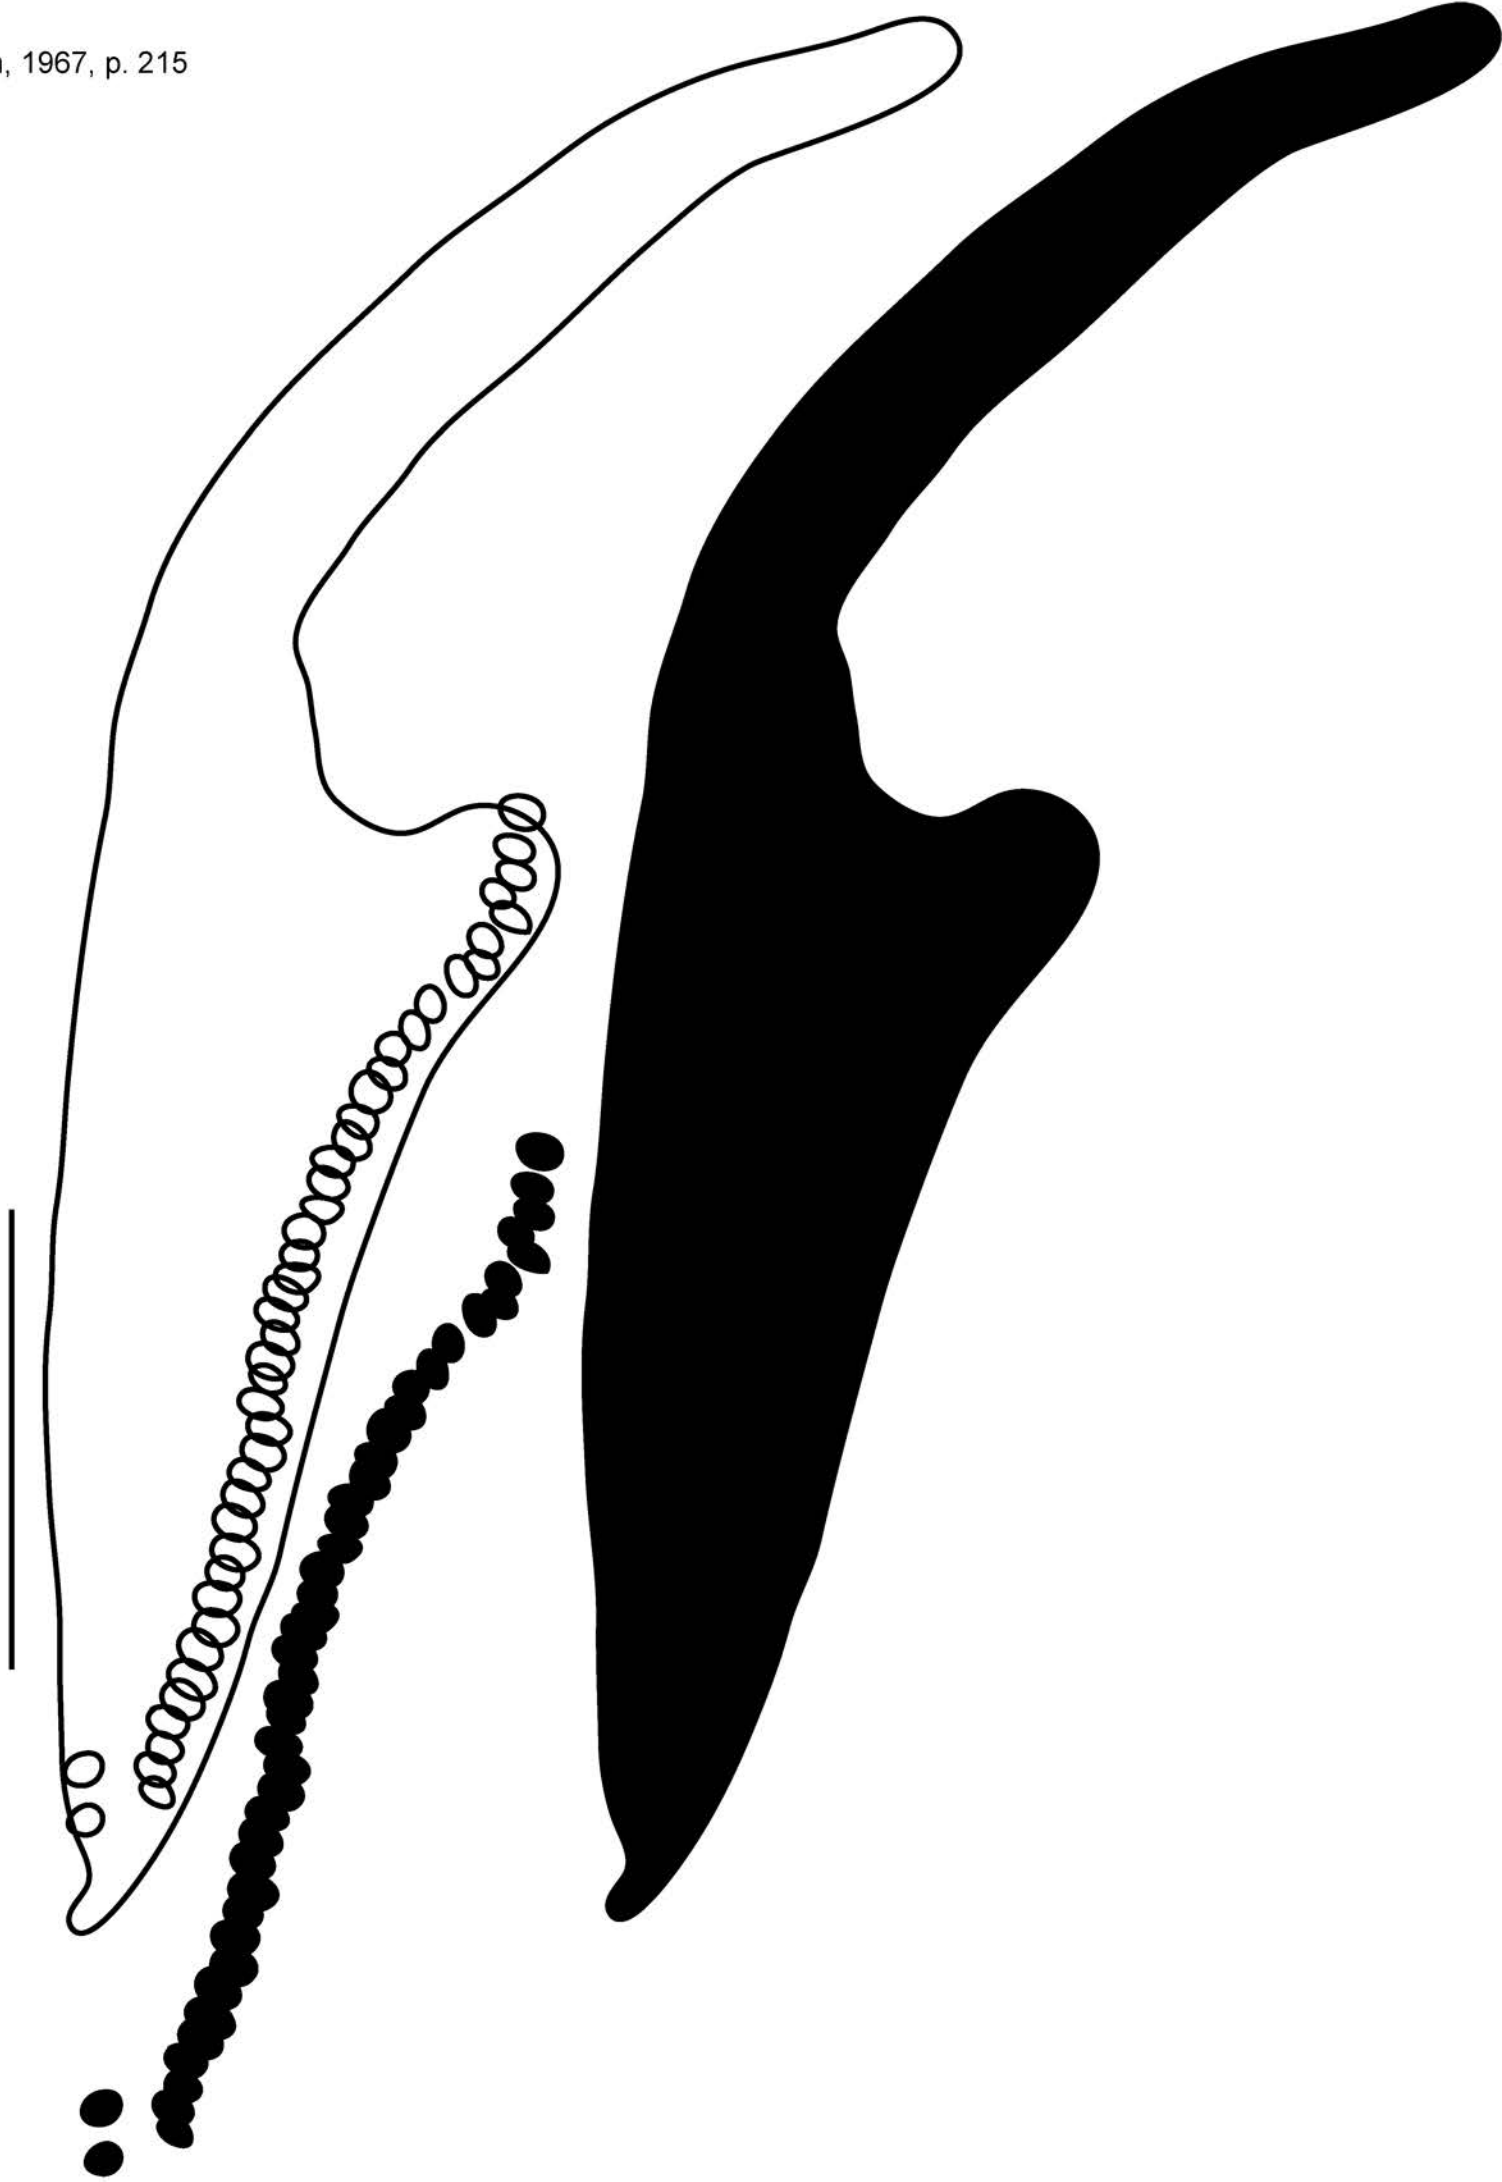

Family: Gastrocotylidae  
Species: *Eyelavera typica* Unnithan, 1968  
Body Surface: 9,500,350  
Clamp Surface: 844,481  
Ratio: 8.89  
Reference: Lebedev, 1986, p. 74

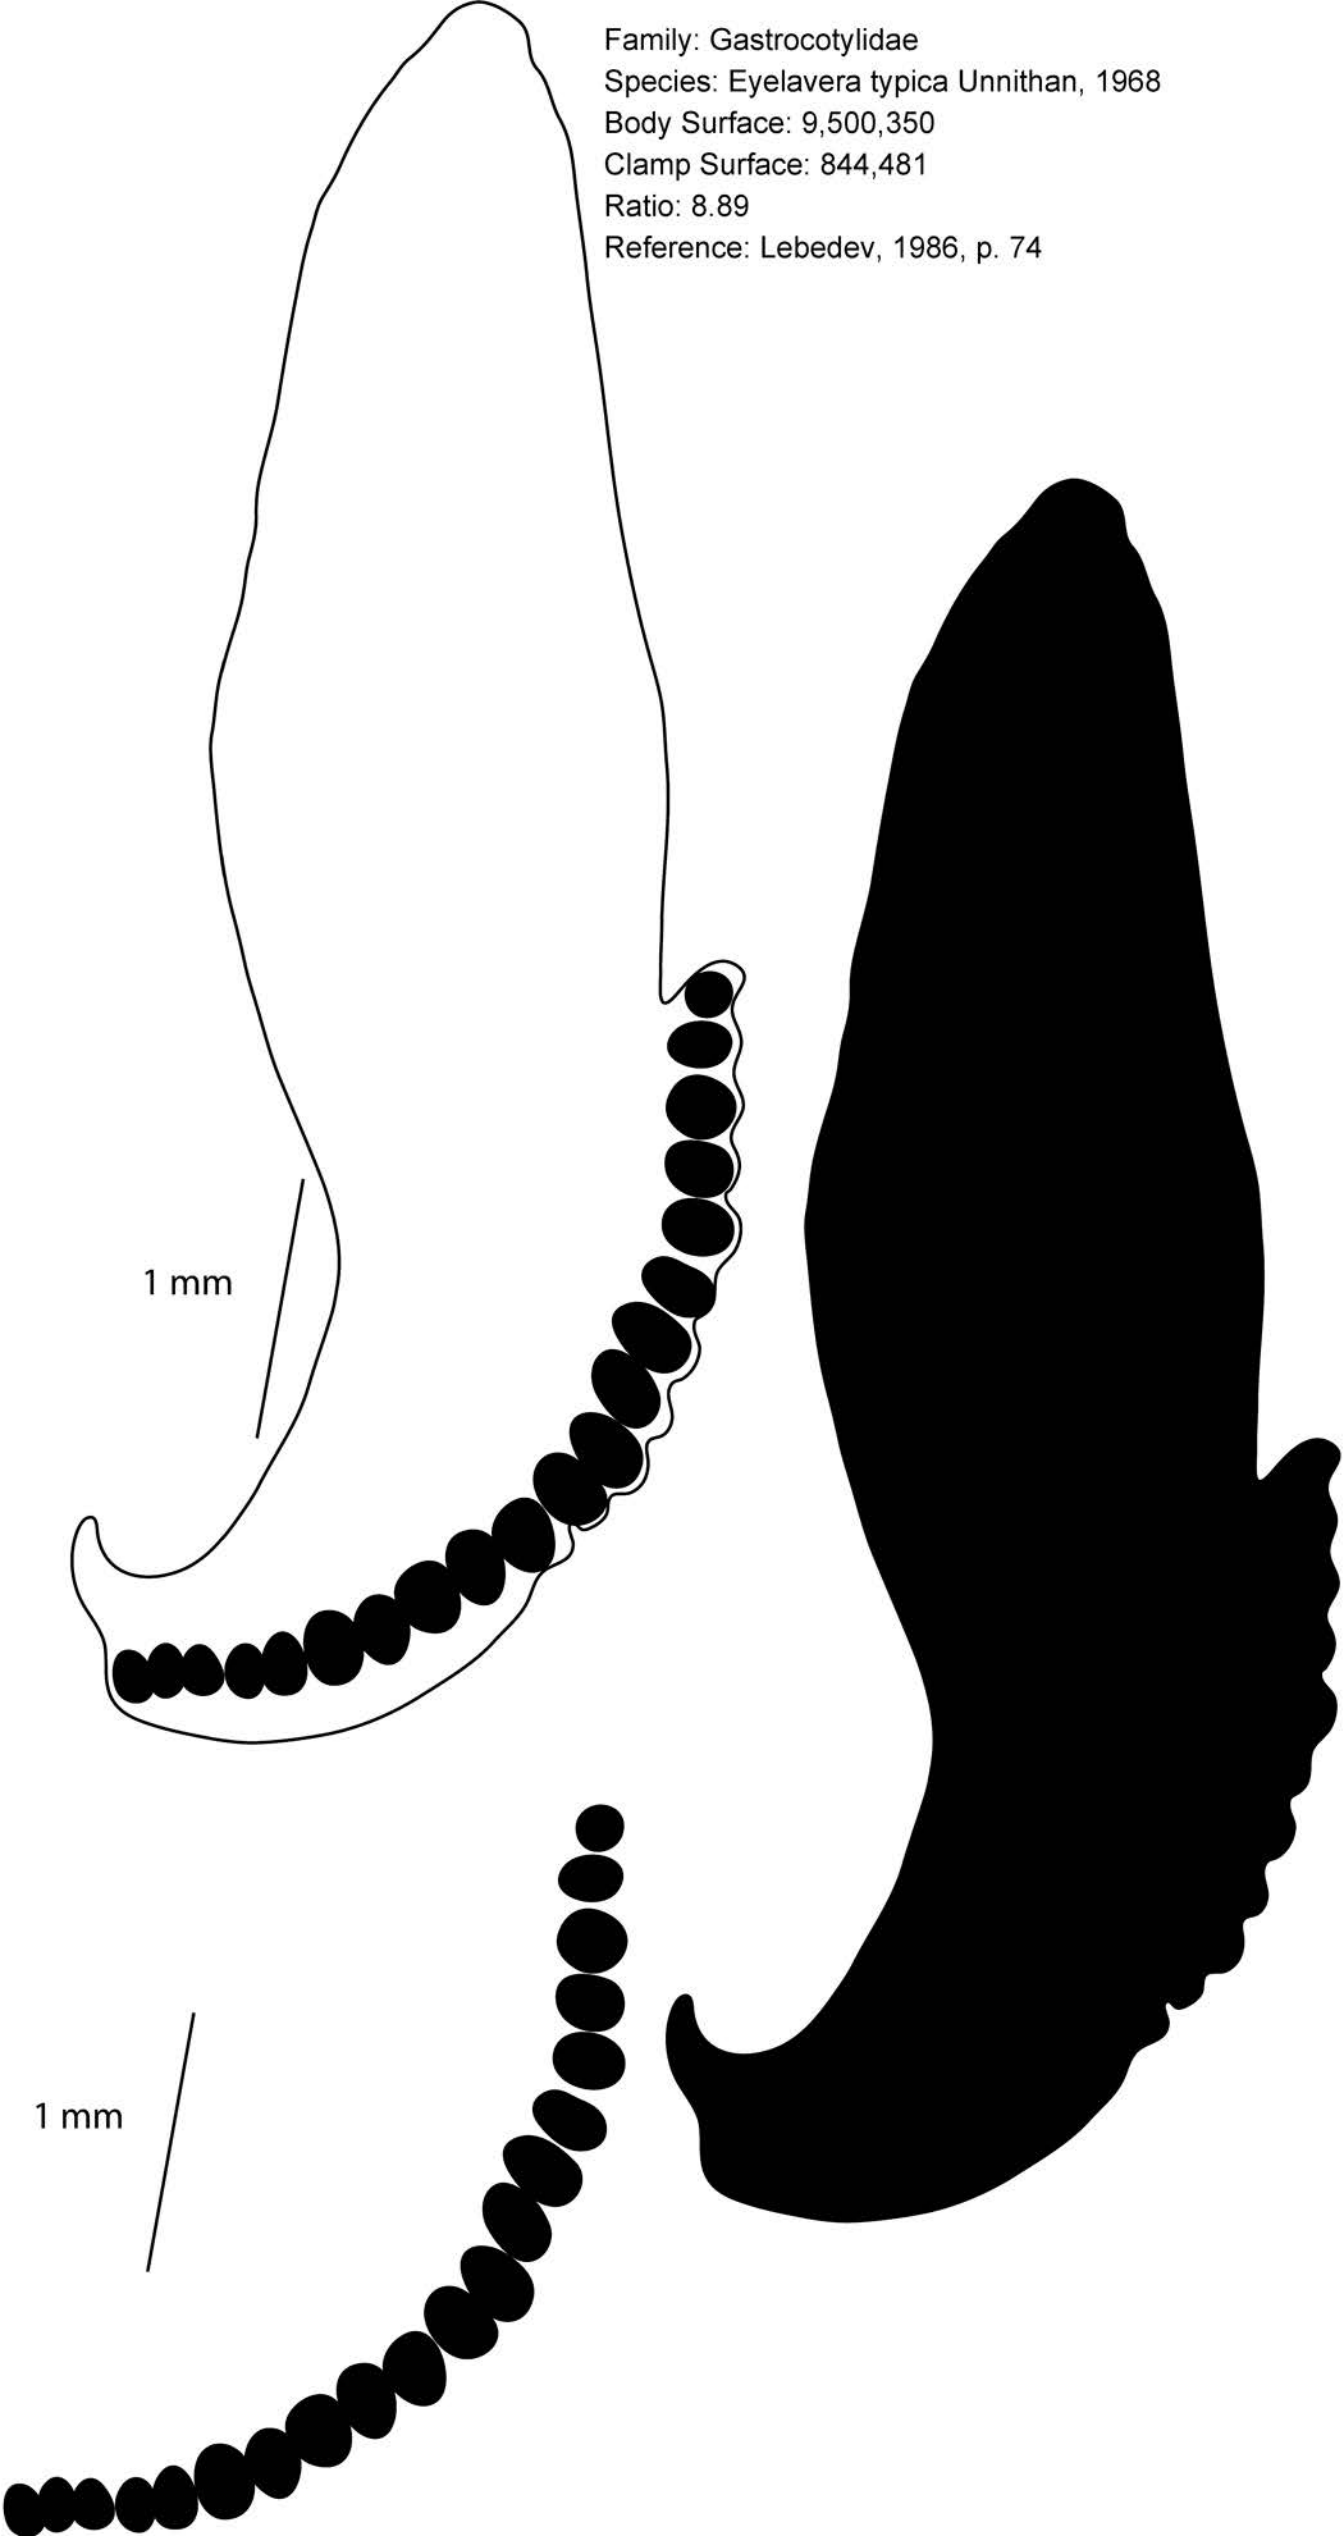

Family: Gastrocotylidae

Species: *Gastrocotyle indica*

Subhapradha, 1951

Body Surface: 281,048

Clamp Surface: 27,274

Ratio: 9.70

Reference: Pandey, 2008, p. 361

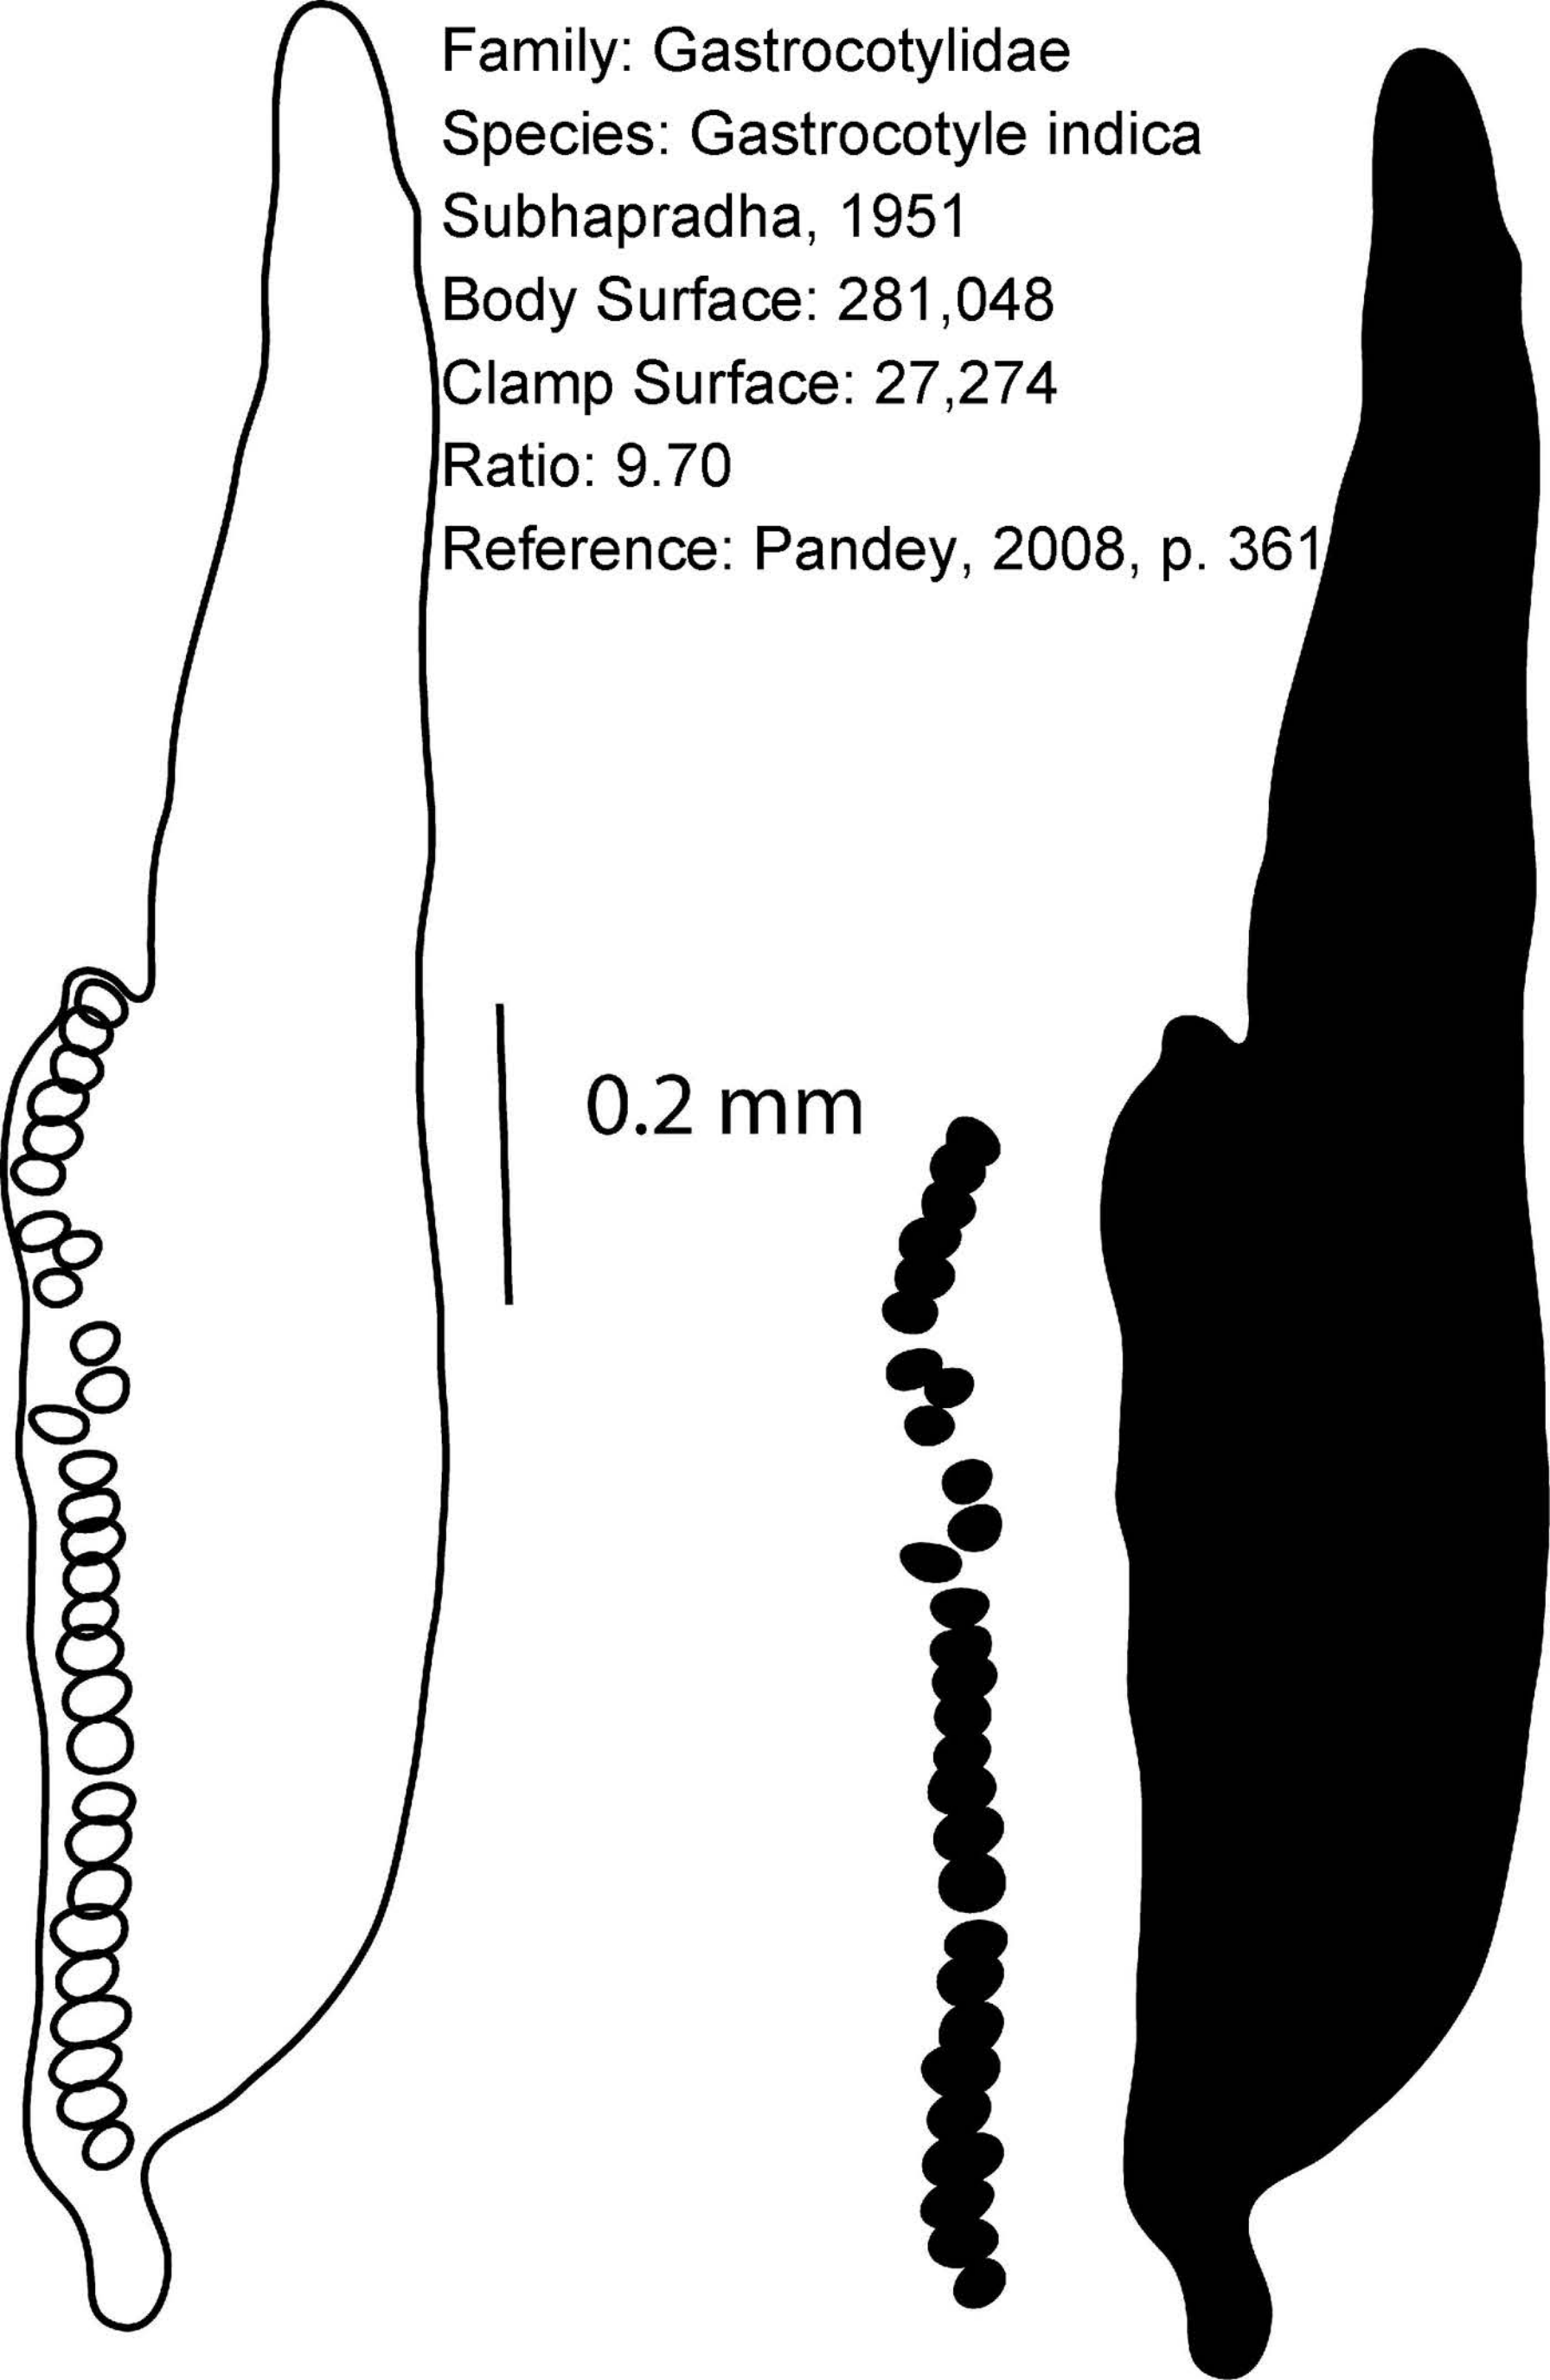

Family: Gastrocotylidae

Species: *Gastrocotyle kurra*

Unnithan, 1968

Body Surface: 2,864,859

Clamp Surface: 266,456

Ratio: 9.30

Reference: Pandey, 2008,  
p. 362

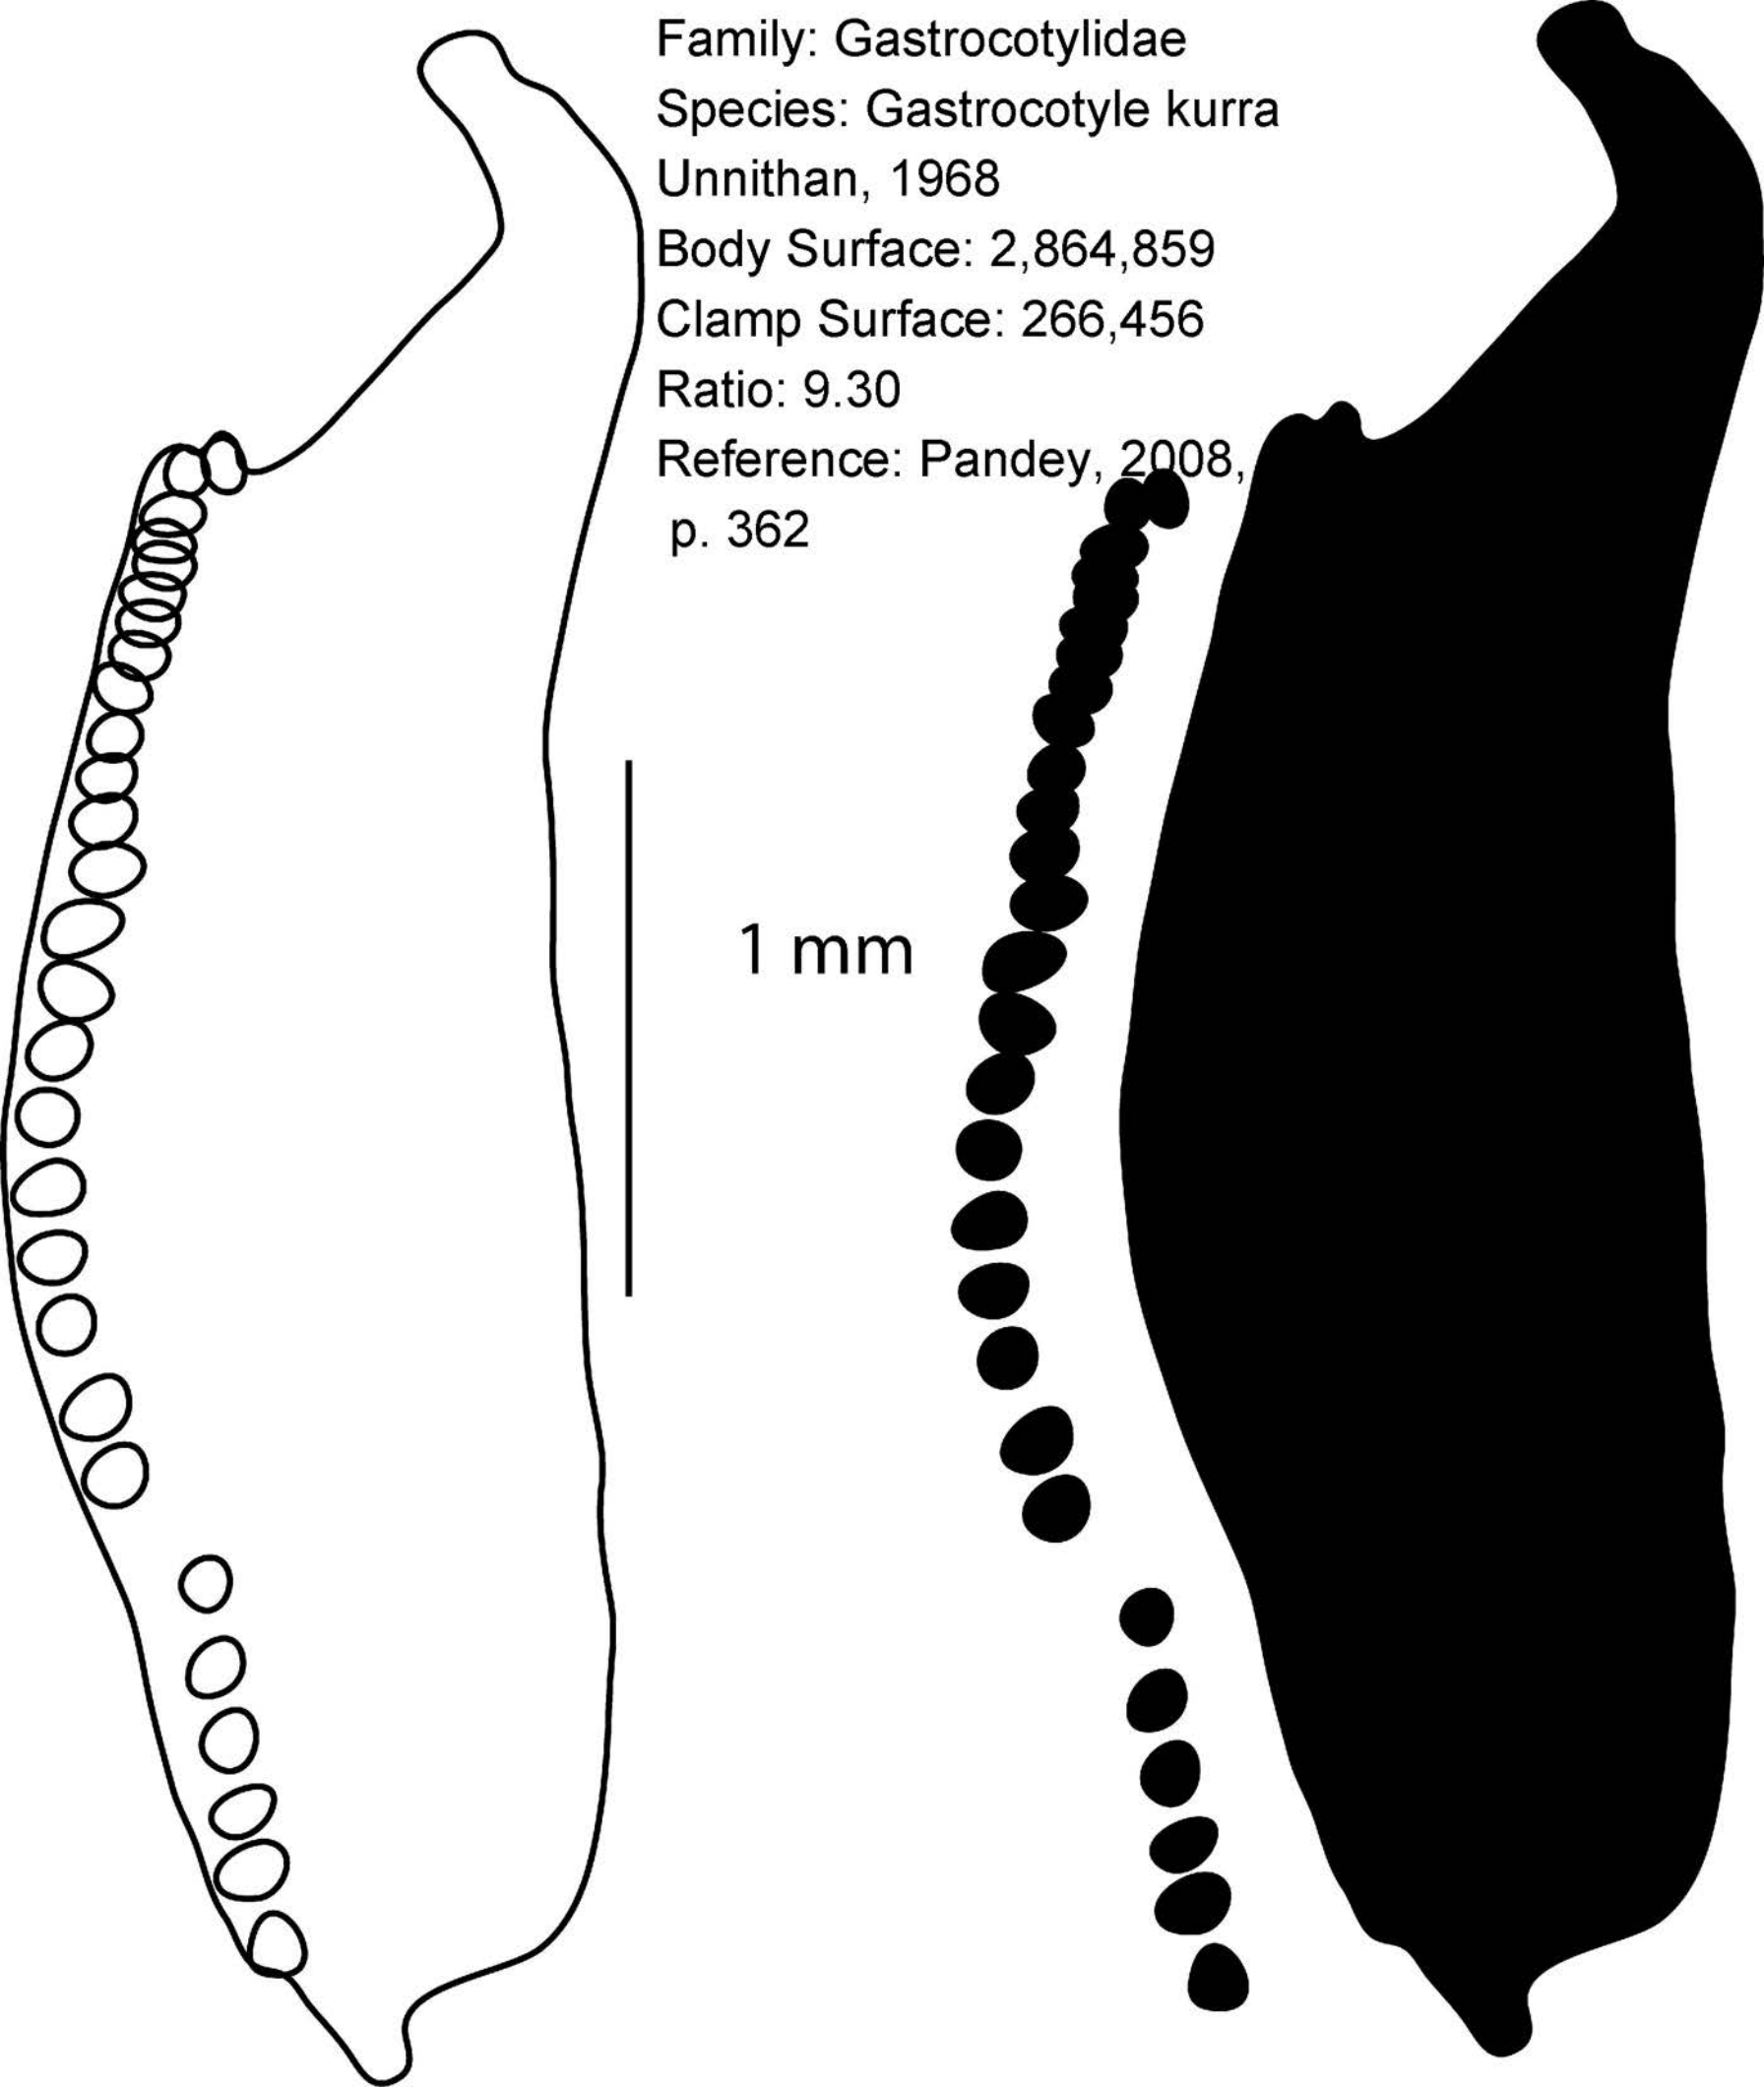

Family: Gastrocotylidae

Species: *Gastrocotyloides dillonhargisi* Lebedev, 1980

Body Surface: 1,273,059

Clamp Surface: 233,778

Ratio: 18.36

Reference: Lebedev, 1986, p. 72

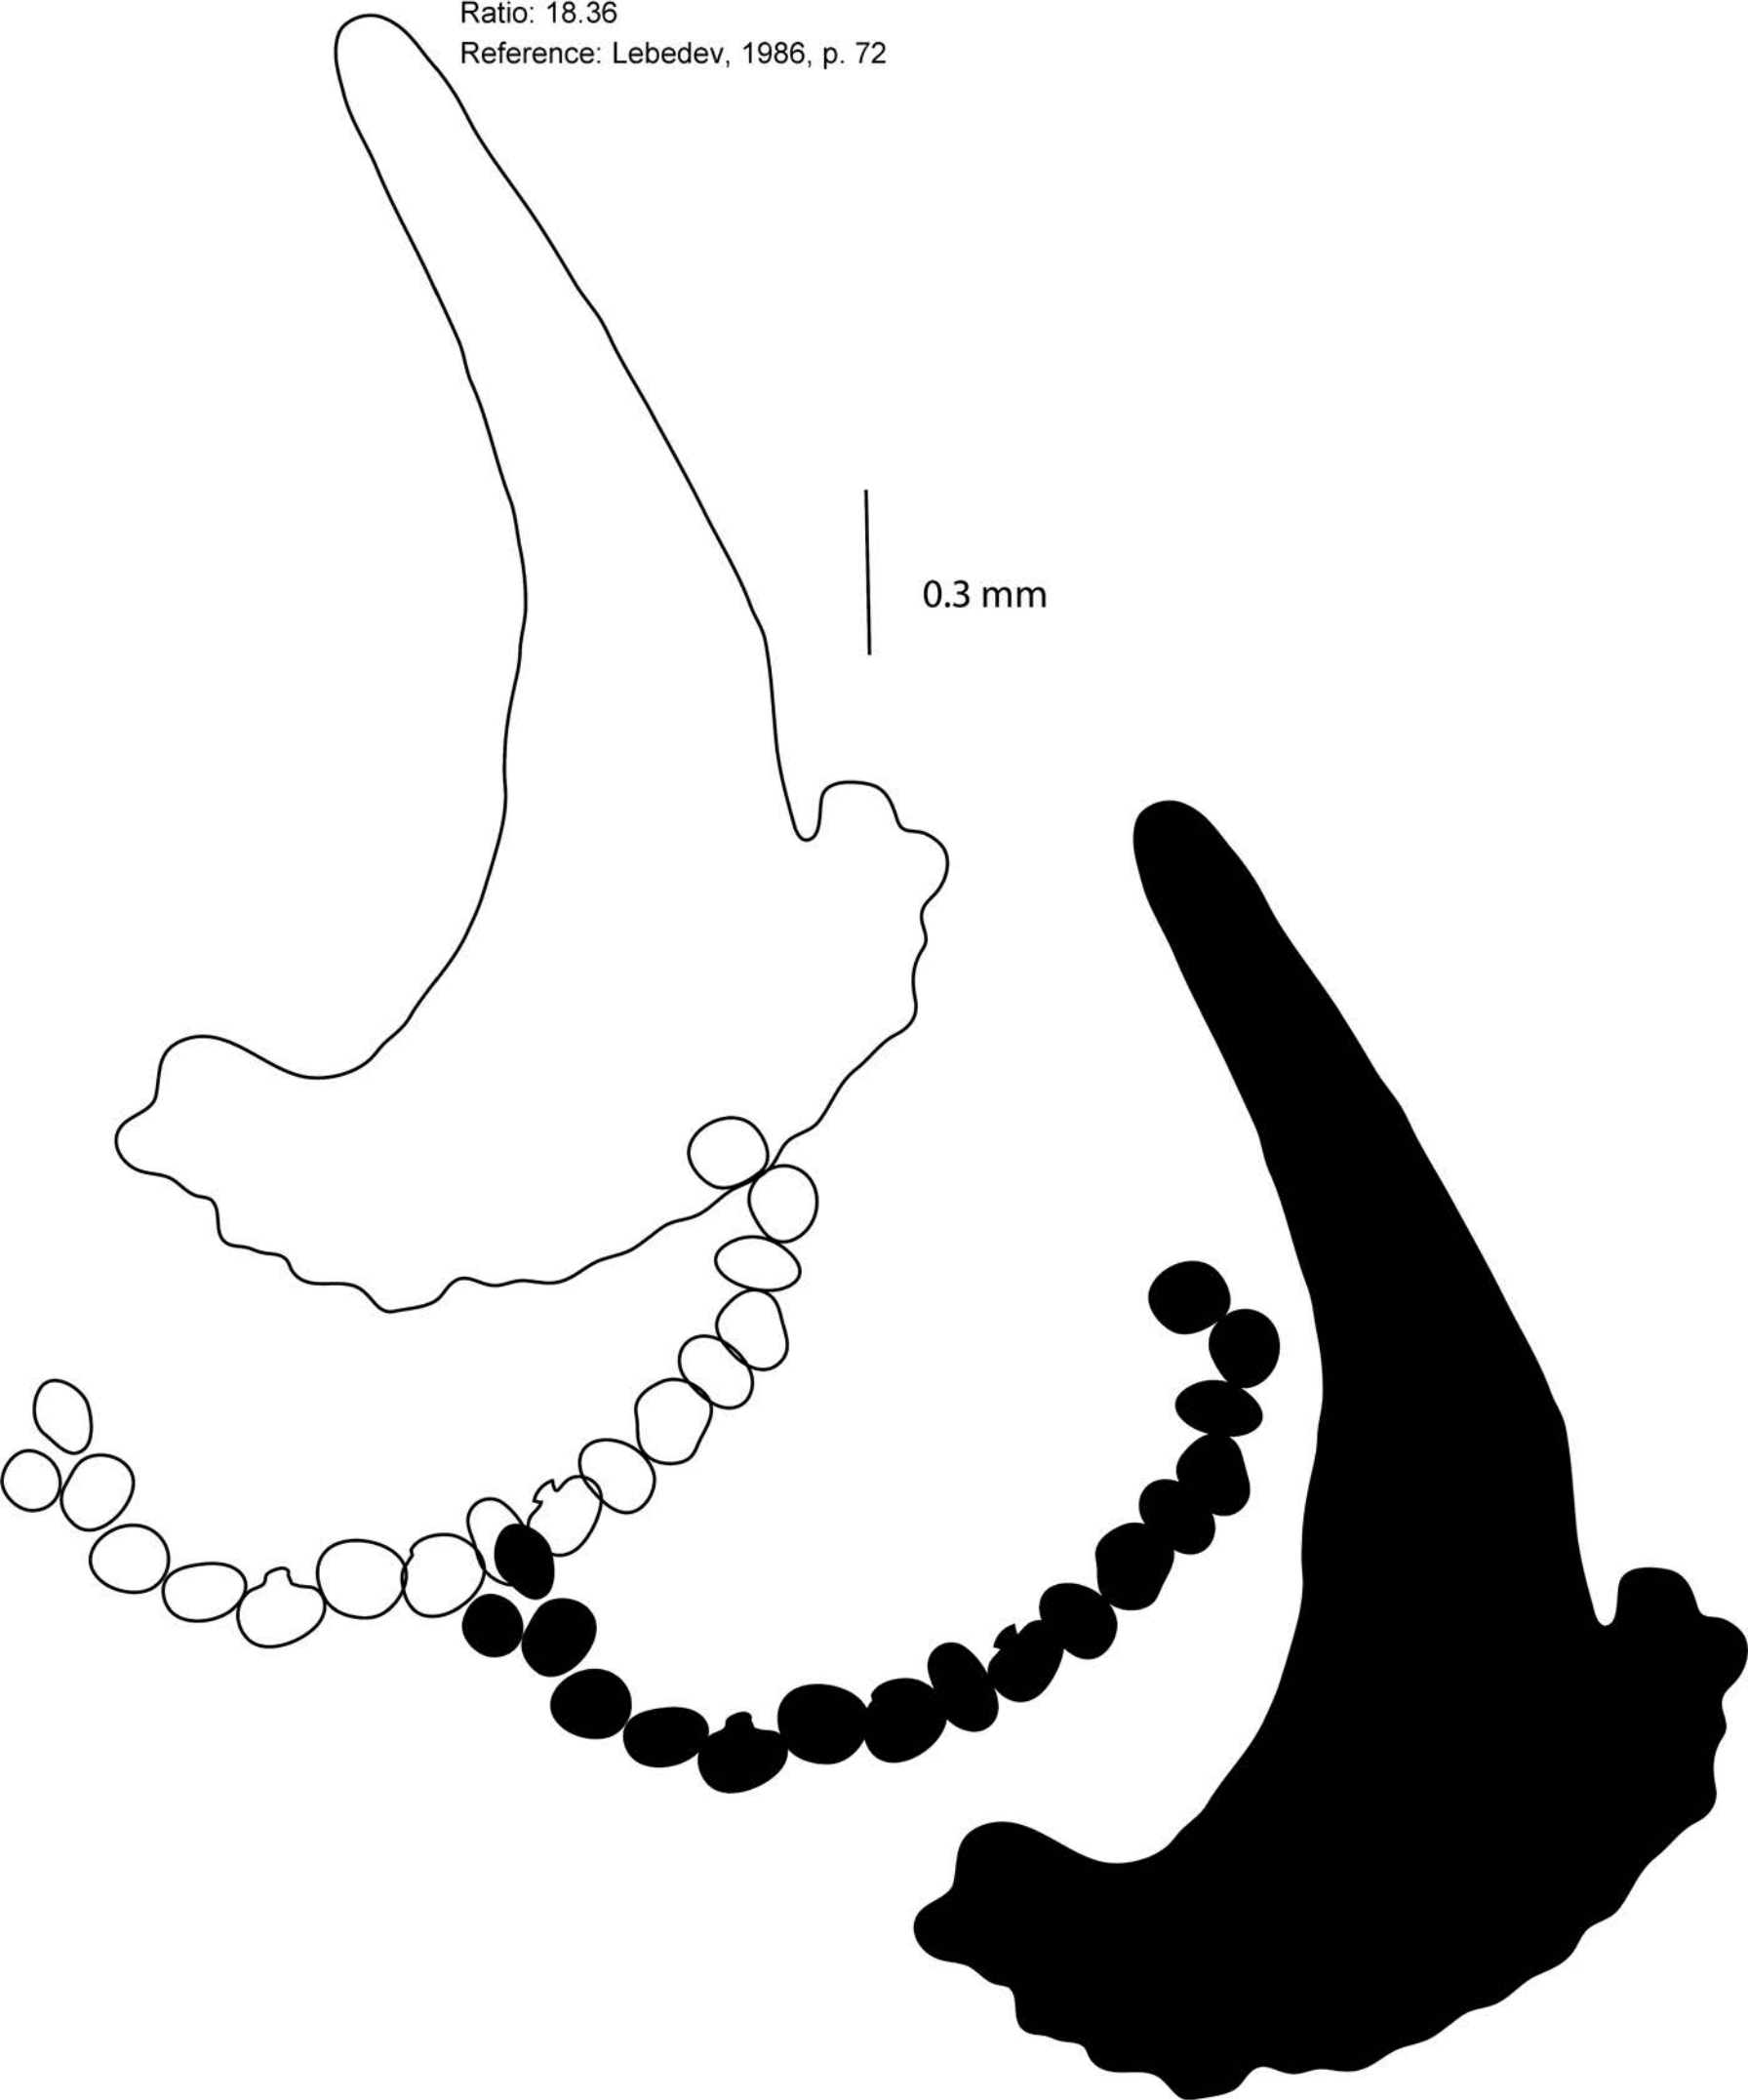

Family: Gastrocotylidae  
Species: *Irinaxine miniata* Ghichenok, 1980  
Body Surface: 741,990  
Clamp Surface : 59,441  
Ratio: 8.01  
Reference: Lebedev, 1986, p. 60

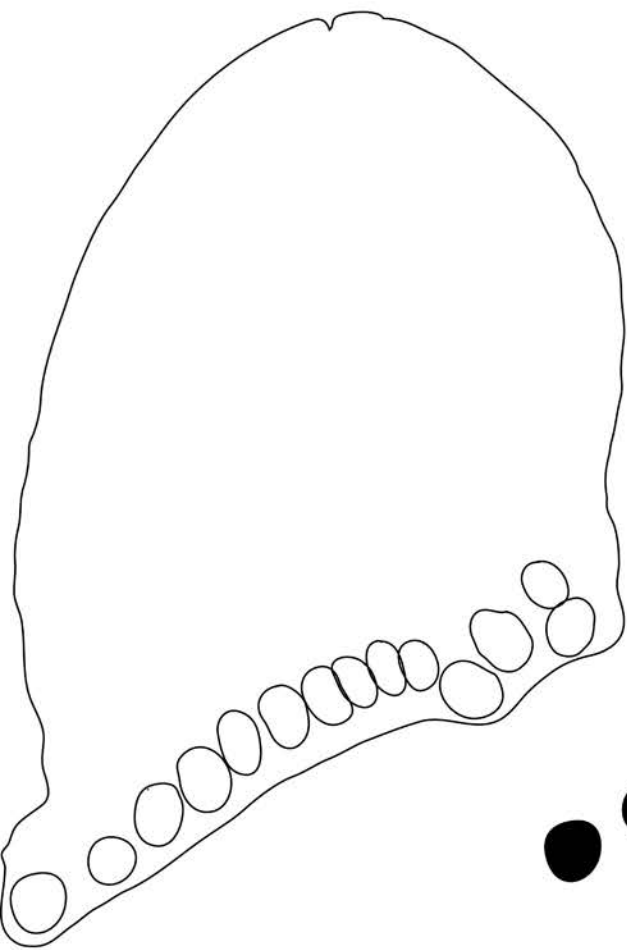

| 0.1 mm

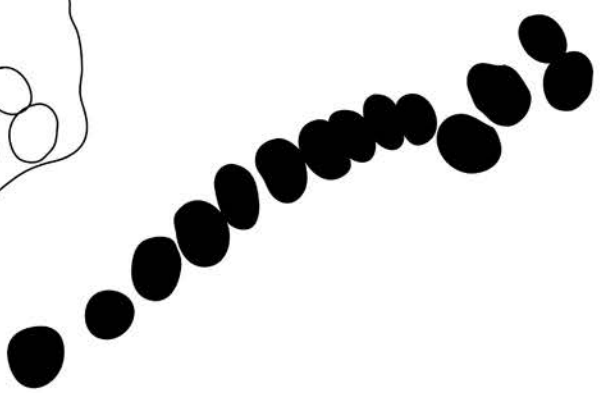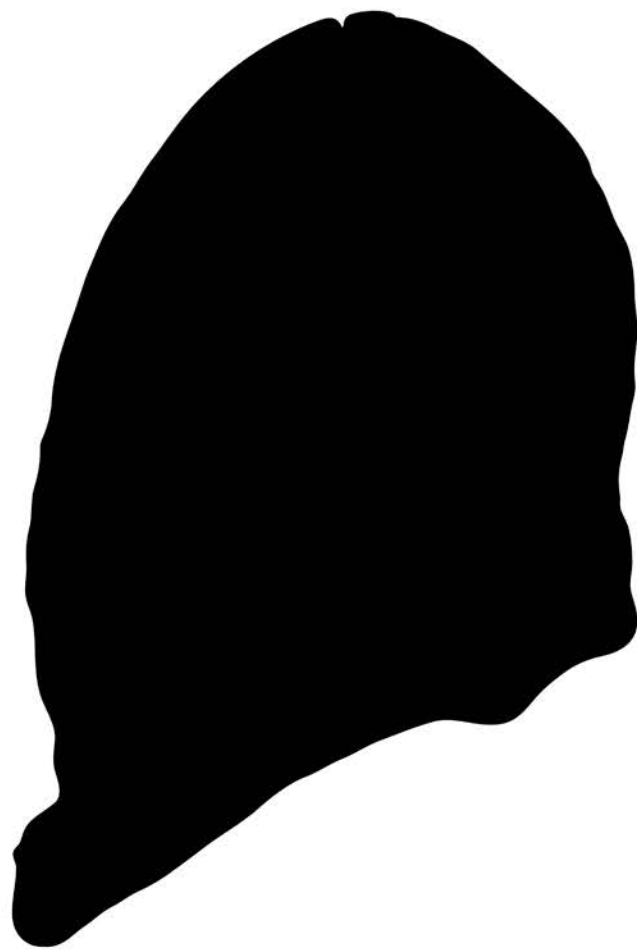



Family: Gastrocotylidae  
Species: *Pellonicola arabiana*  
Khan & Karyakarte, 1977  
Body Surface : 1,059,163  
Clamp Surface: 66,909  
Ratio: 6.32  
Reference: Pandey, 2008,  
p. 367

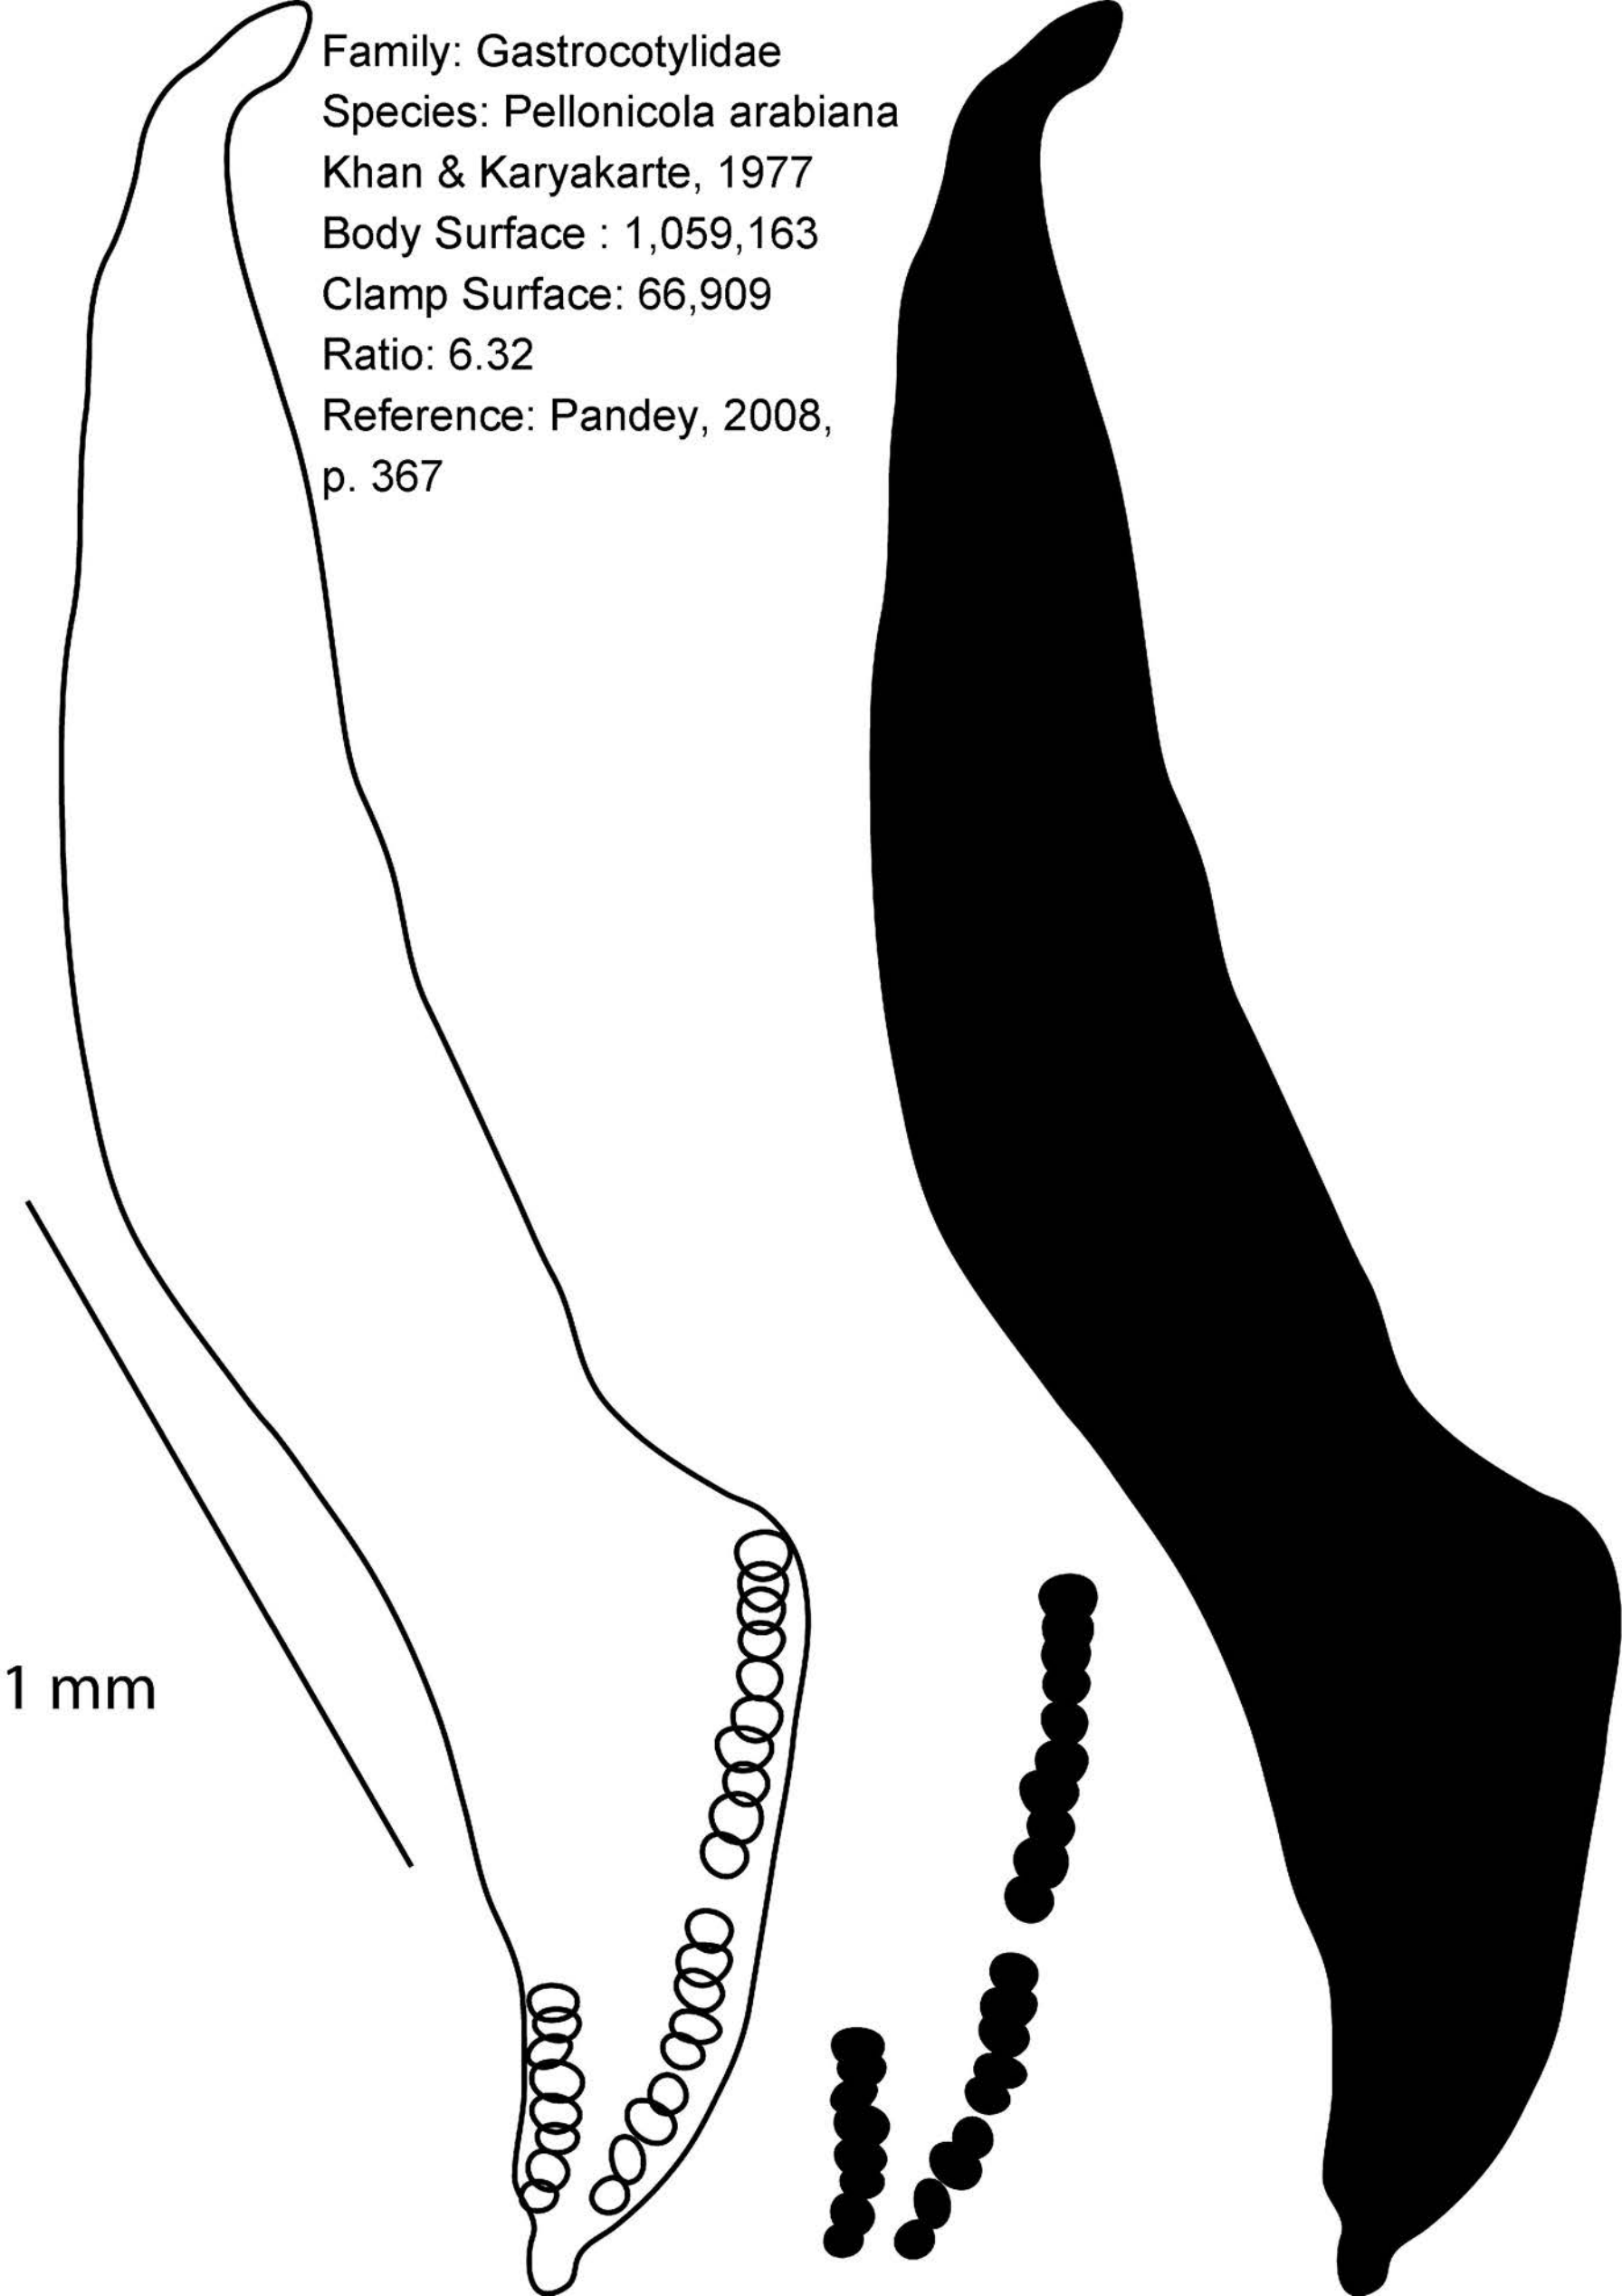

1 mm

Family: Gastrocotylidae

Species: *Pellonicola elongatus* Unnithan, 1967

Body Surface: 353,696

Clamp Surface: 27,079

Ratio: 7.66

Reference: Unnithan, 1967, p. 225

1 mm

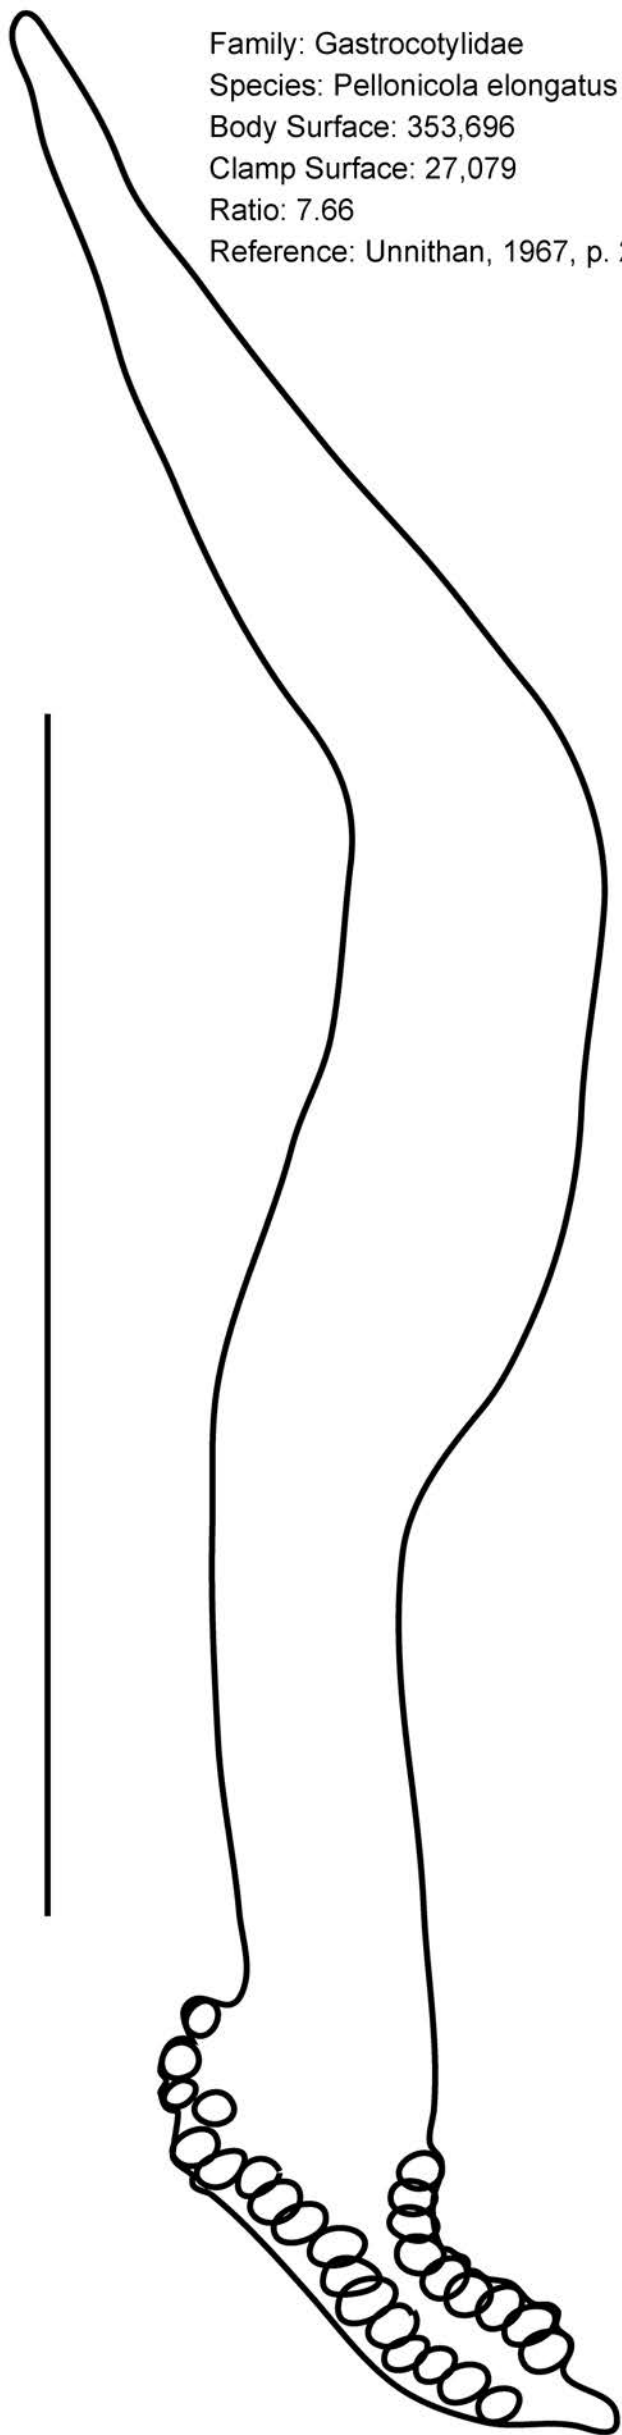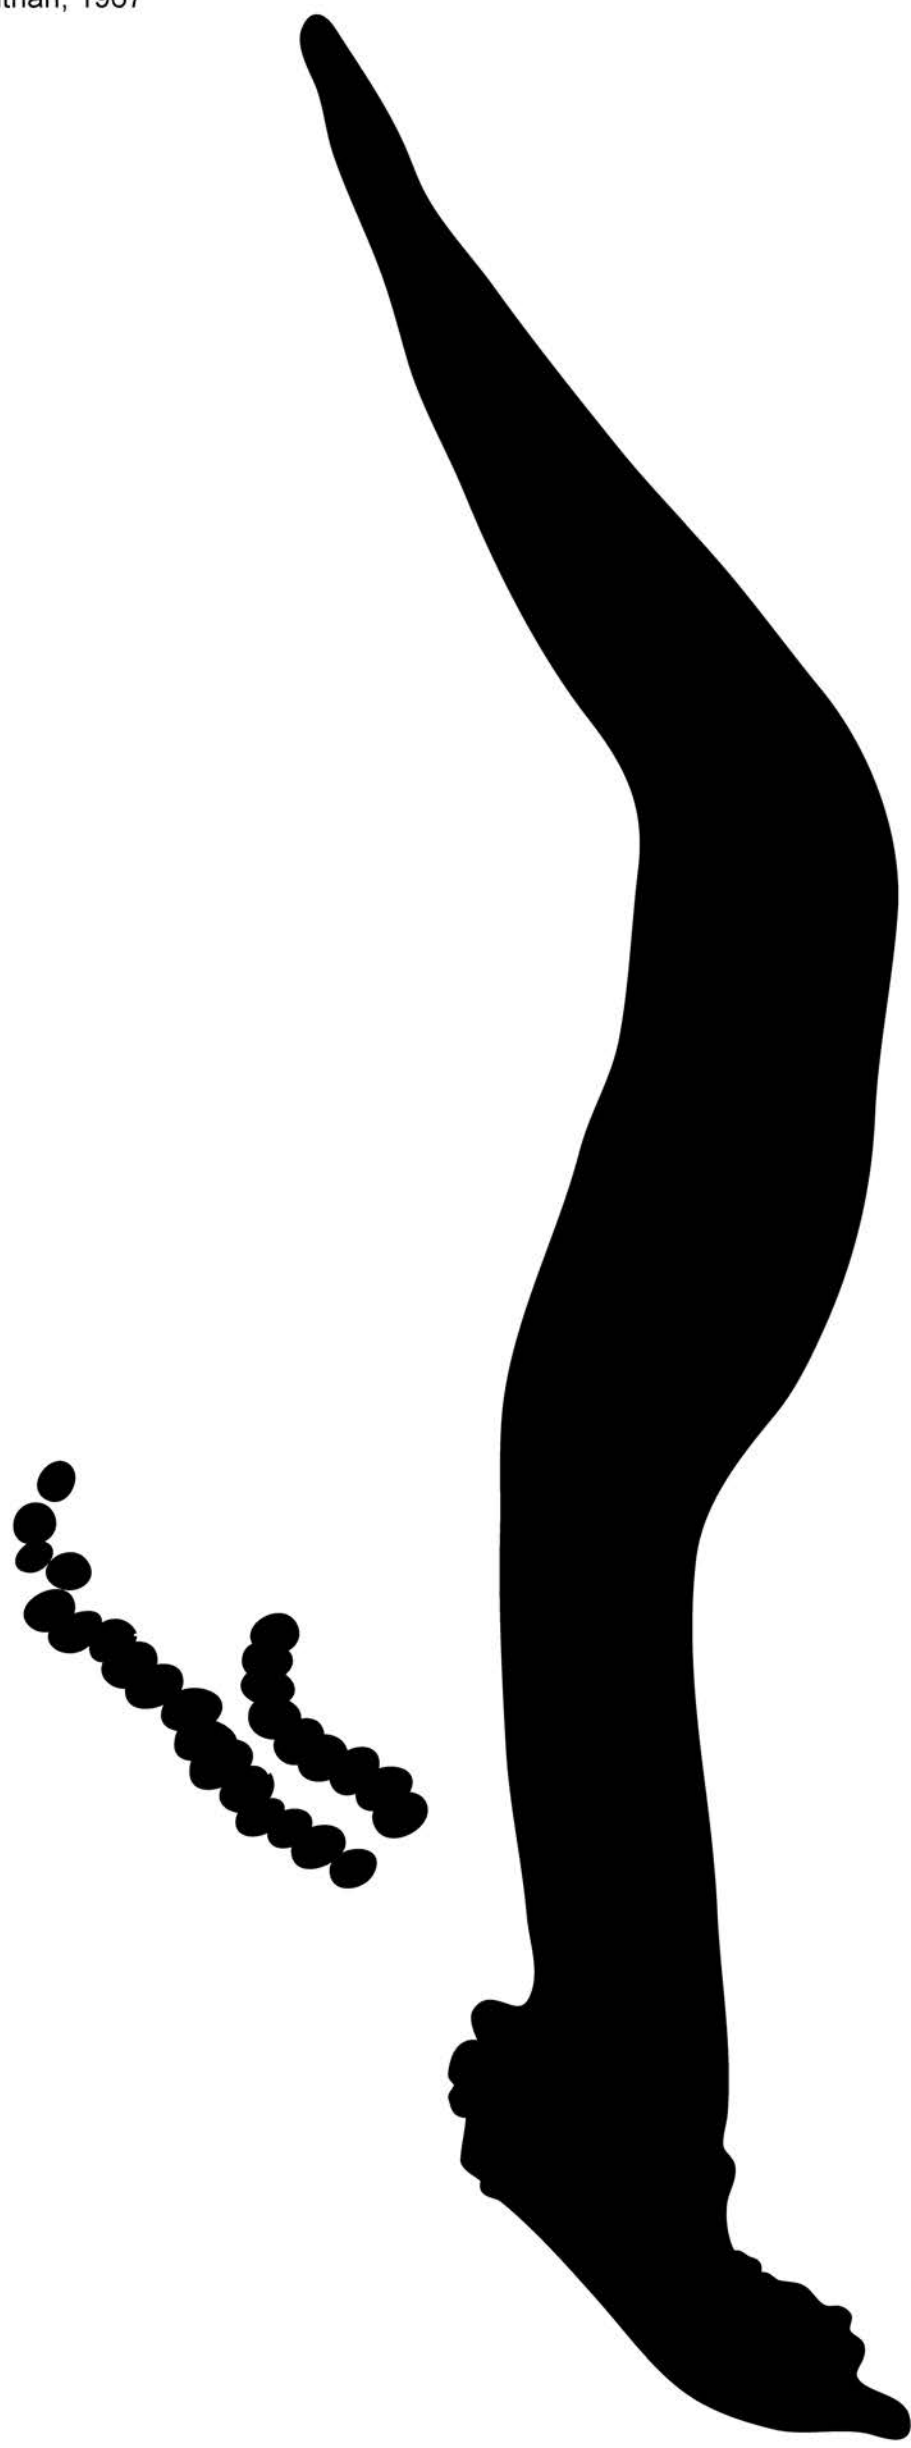

Family: Gastrocotylidae  
Species: *Pellonicola lanceolatus* Kritsky & Bilqees, 1973  
Body Surface: 1,785,588  
Clamp Surface: 102,492  
Ratio: 5.74  
Reference: Kritsky, 1973, p. 198

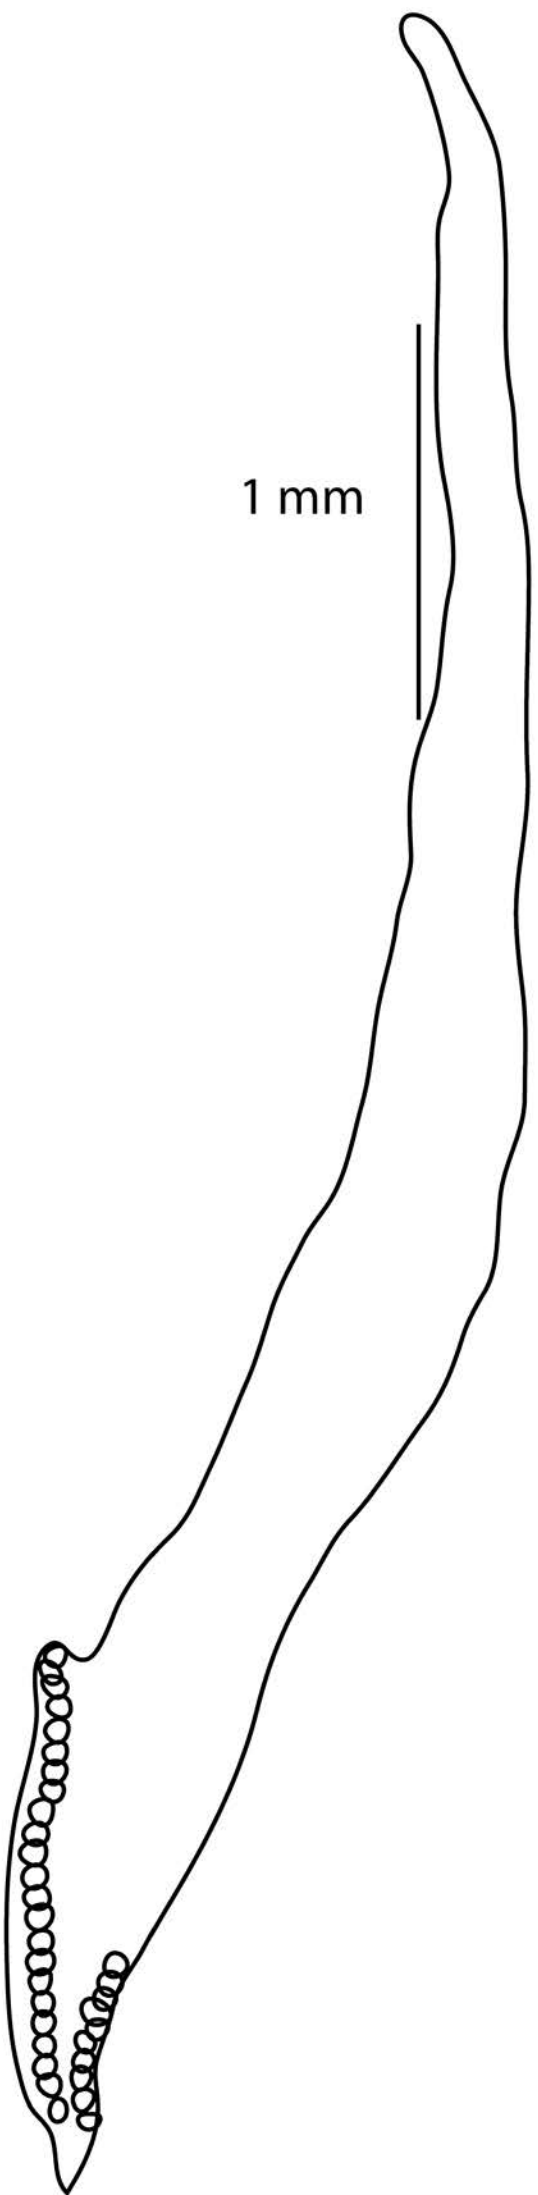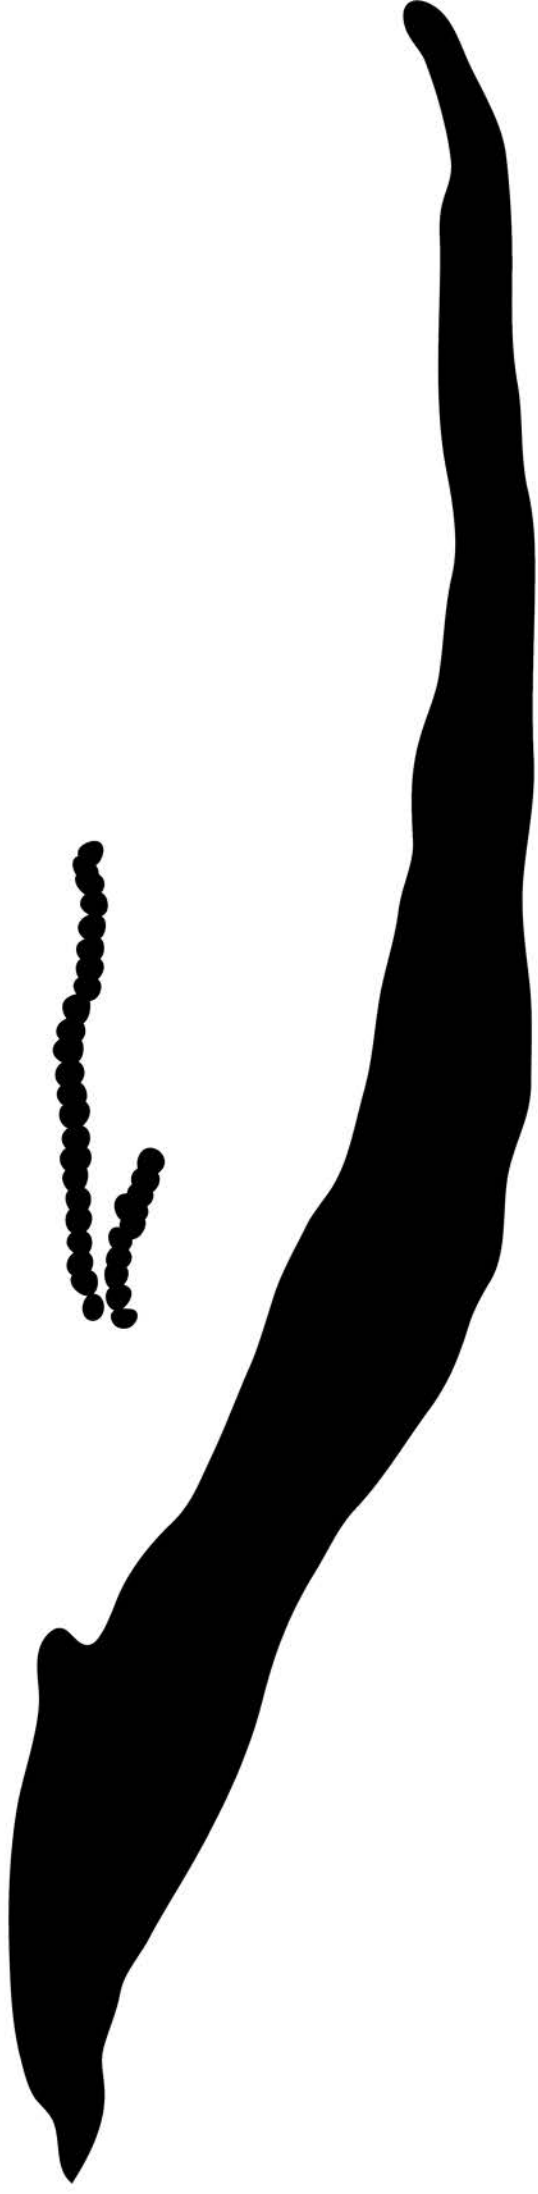

Family: Gastrocotylidae  
Species: *Pseudaxine bivaginalis*  
Dillon & Hargis, 1965  
Body Surface: 1,137,648  
Clamp Surface: 44,201  
Ratio: 3.89  
Reference: Dillon, 1965, p. 276

0.5 mm

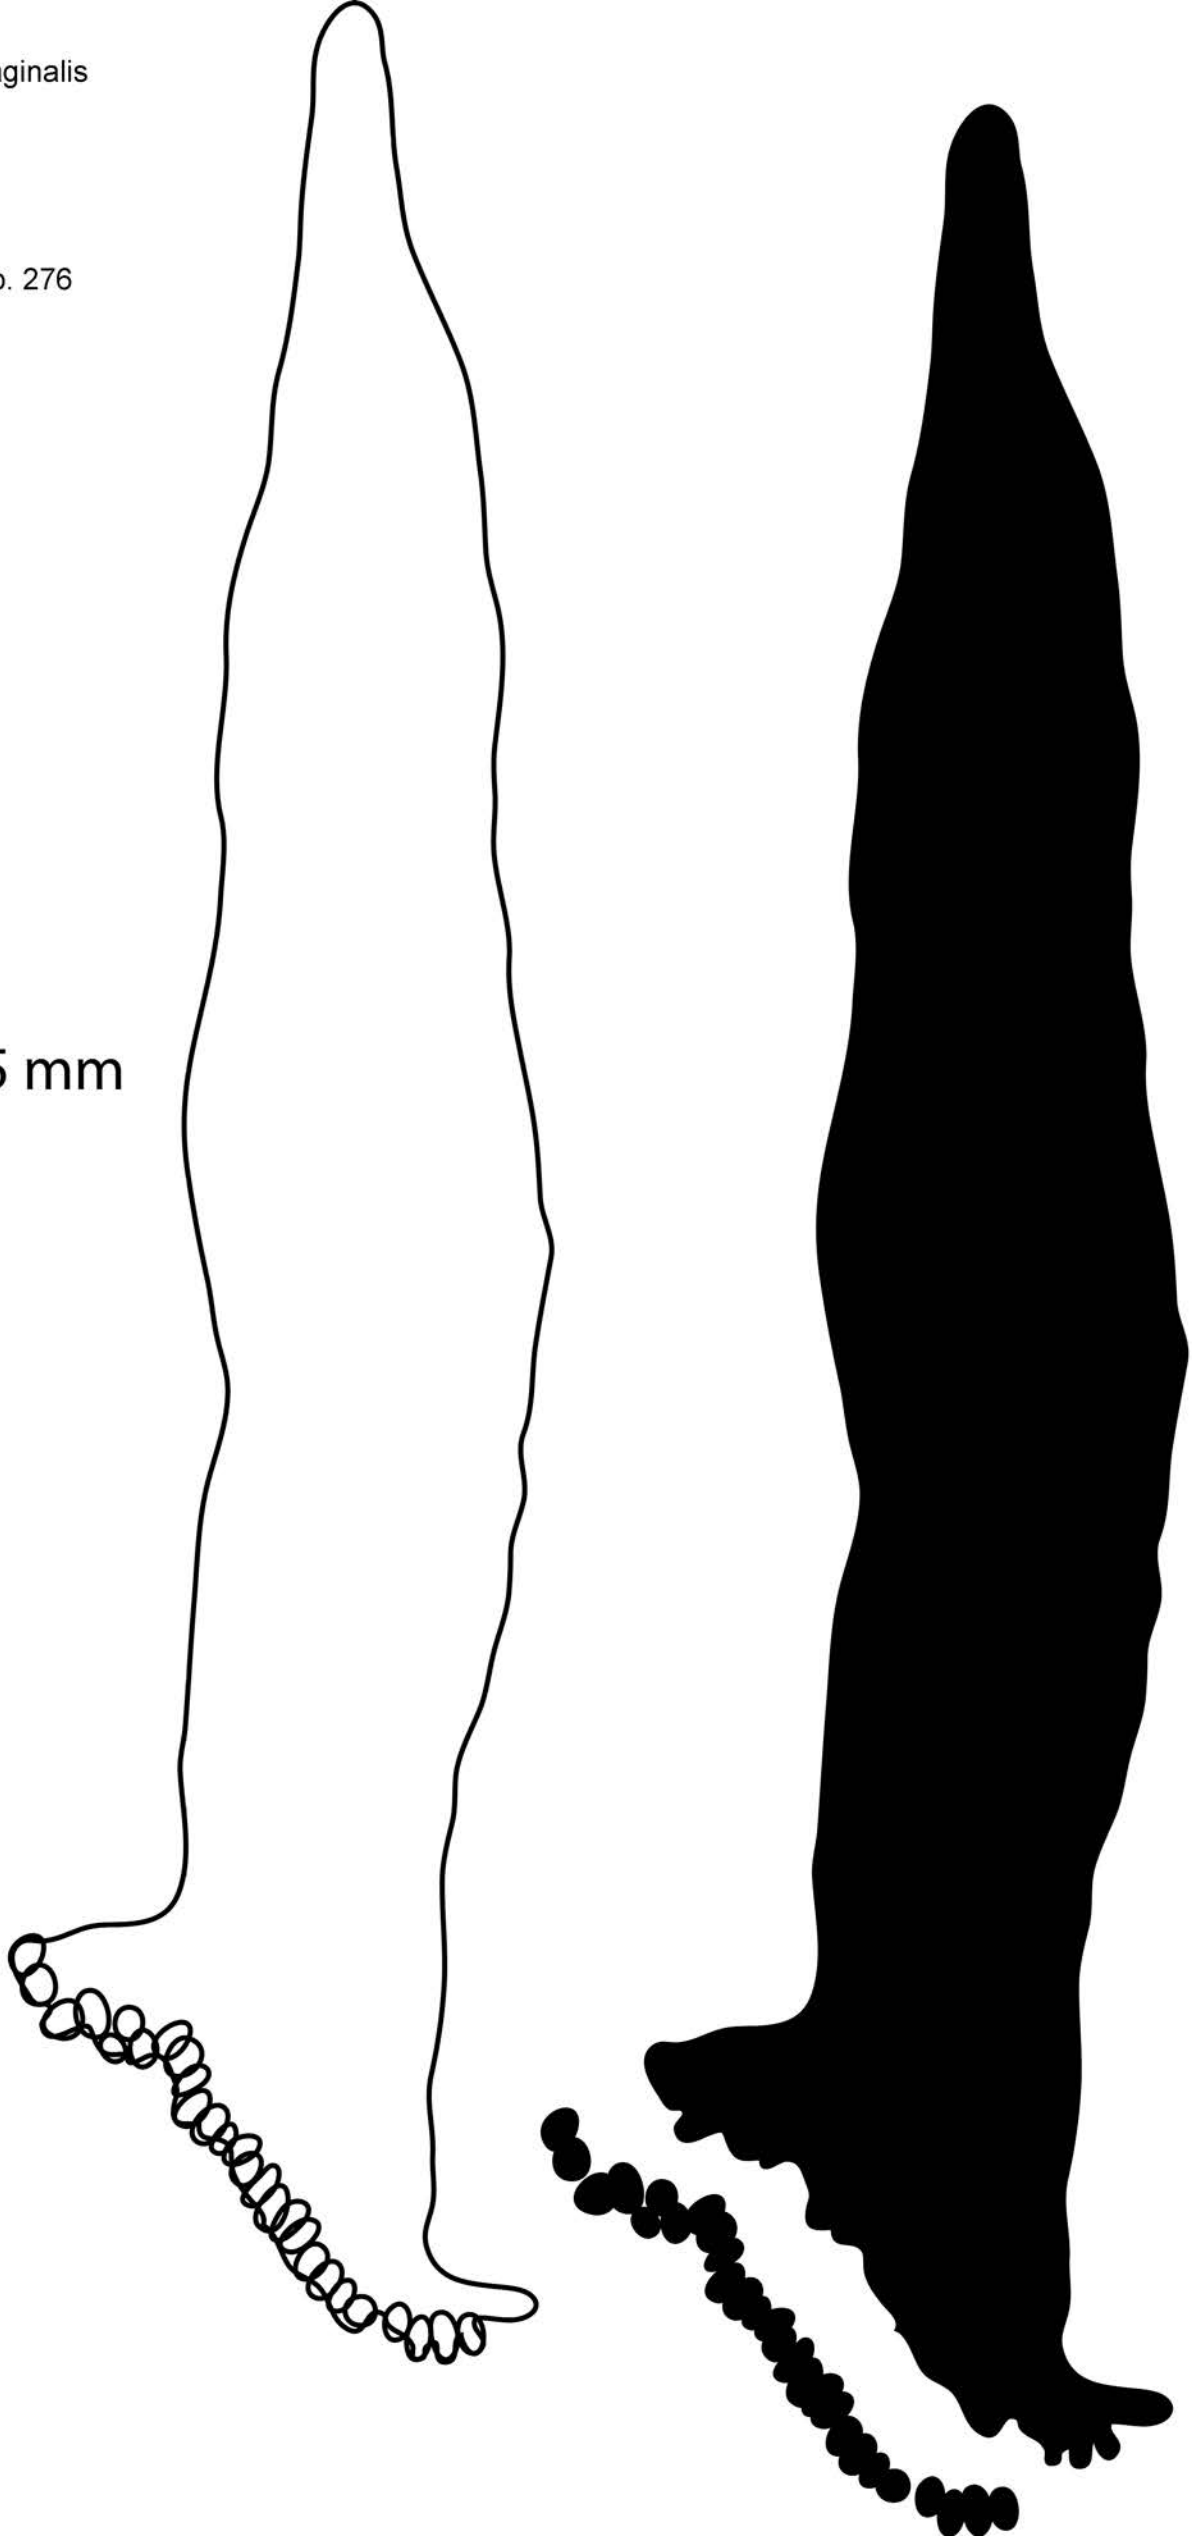

Family: Gastrocotylidae

Species: *Pseudaxine kurra* Unnithan, 1968

Body Surface: 1,909,954

Clamp Surface: 37,999

Ratio: 1.99

Reference: Zhang, 2001, p. 268

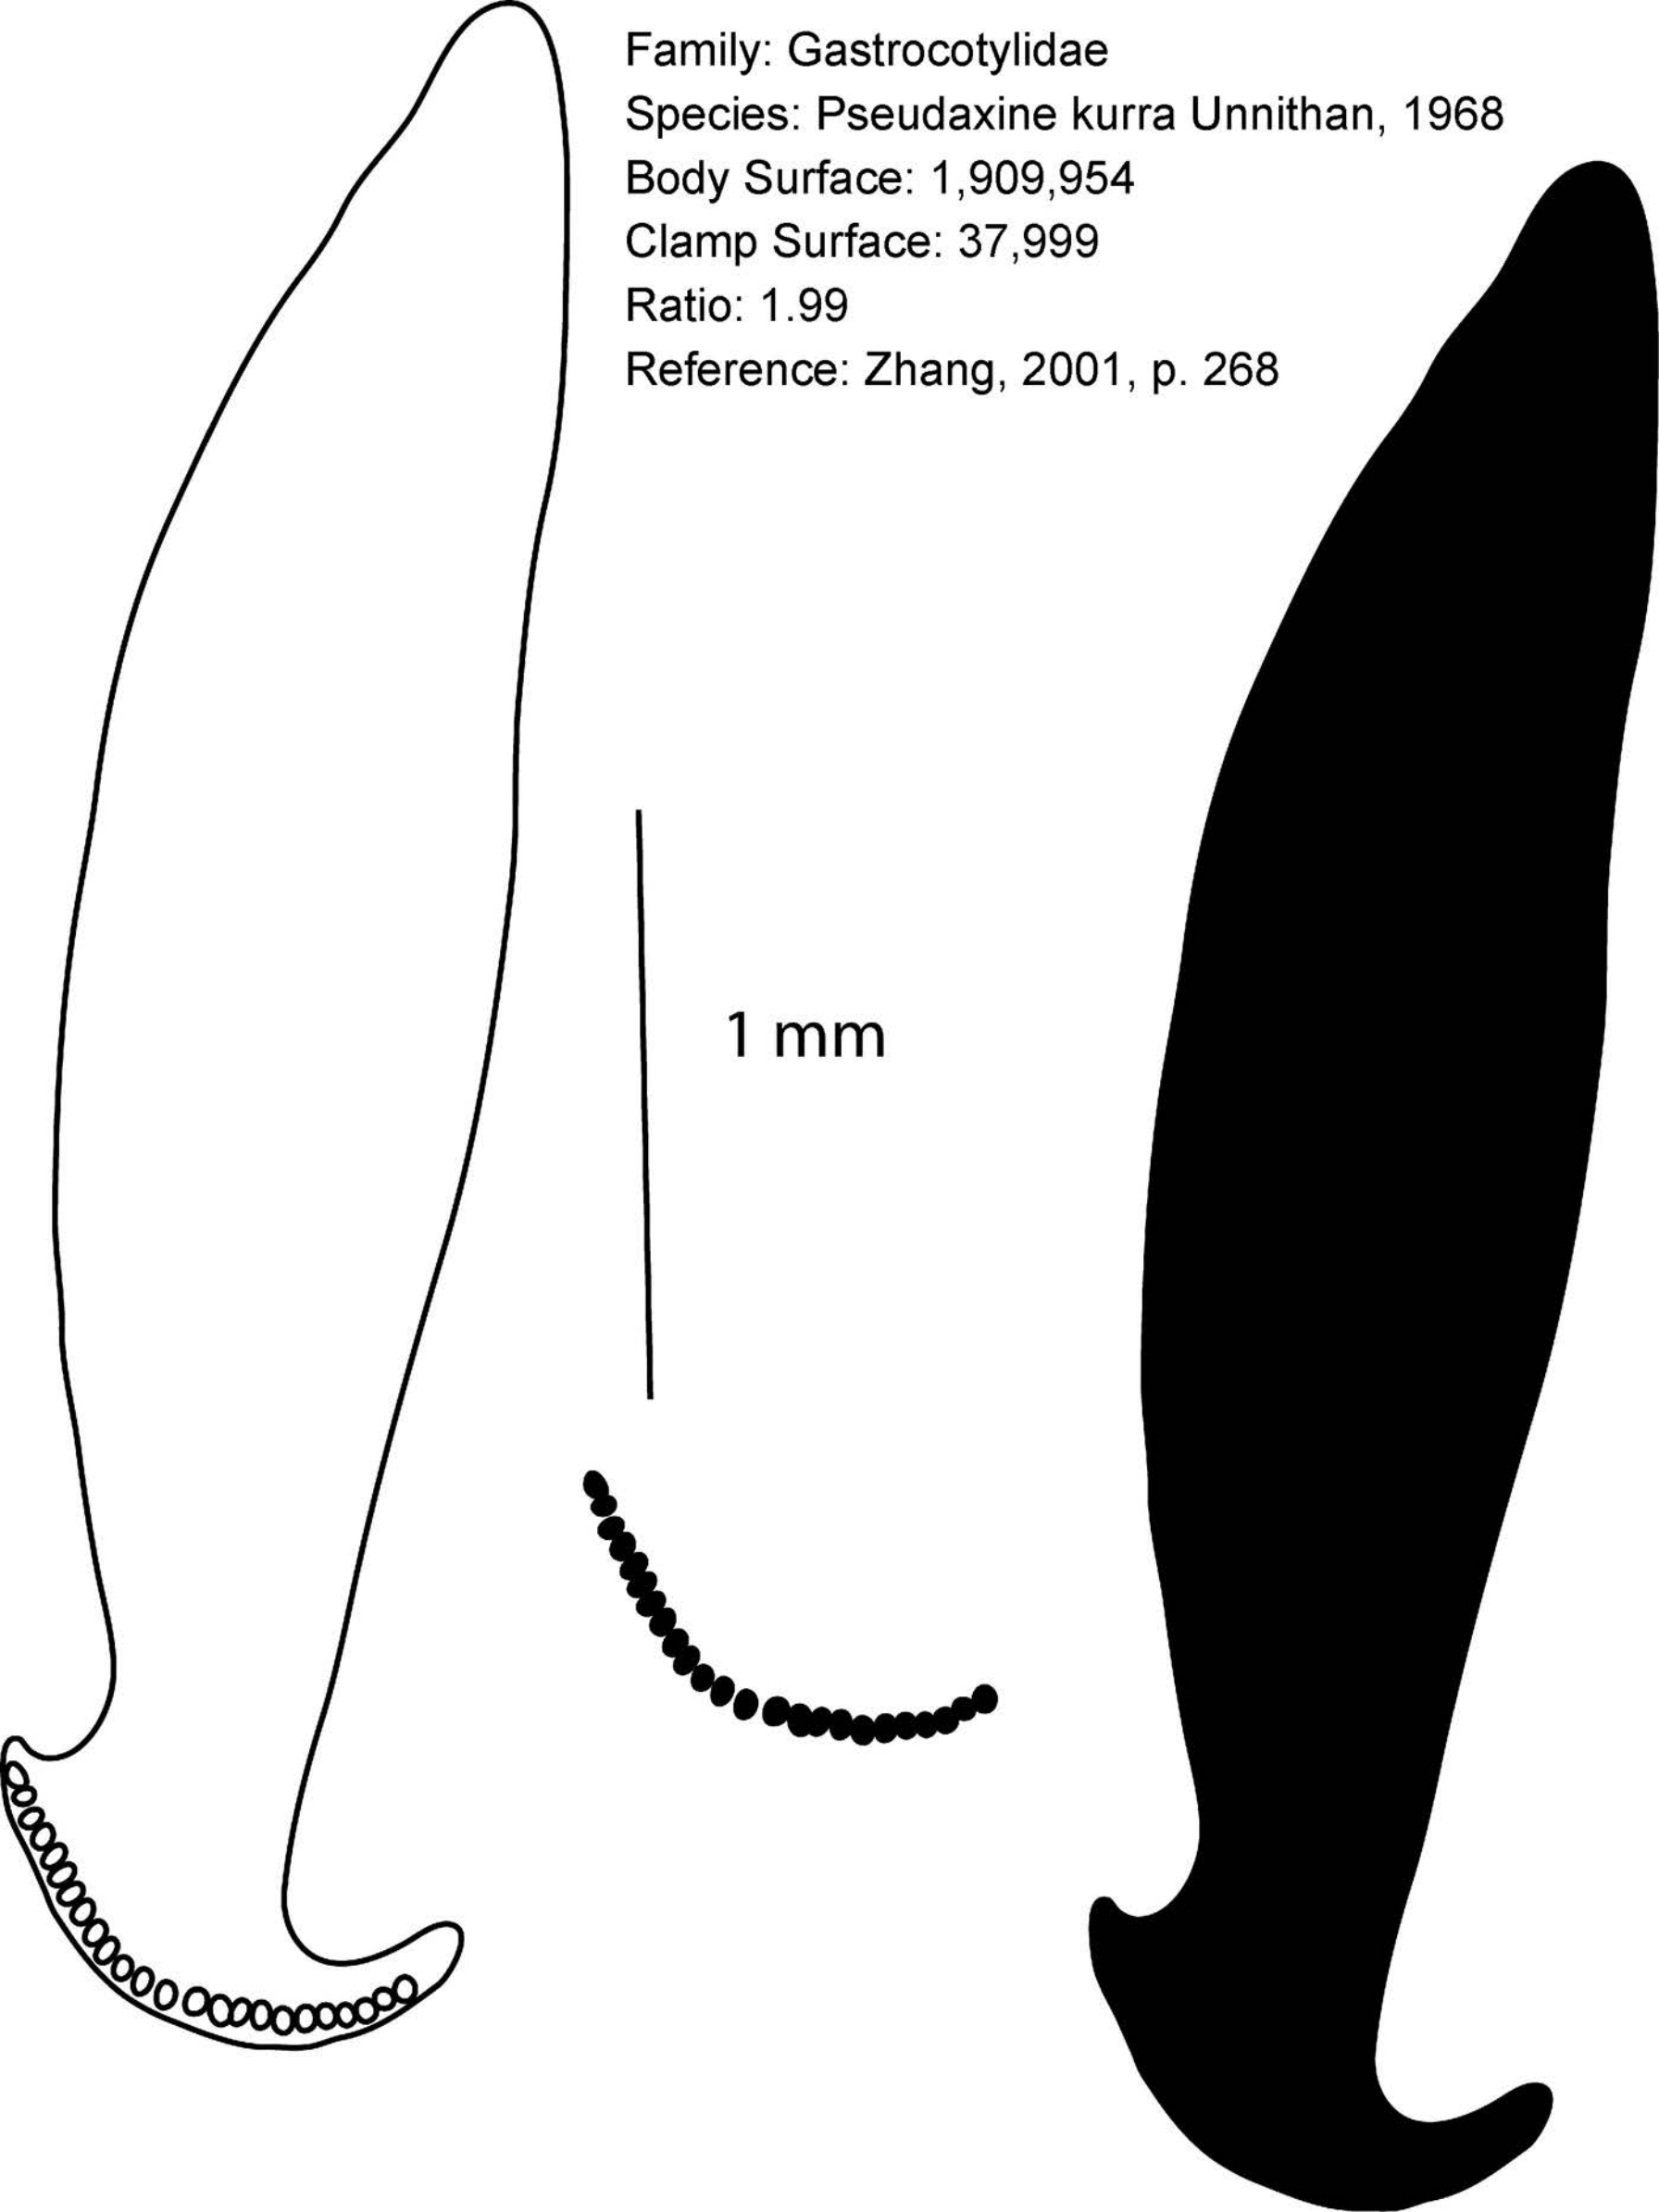

Family: Gastrocotylidae  
Species: Pseudaxinoides caballeroi Lebedev, 1977  
Body Surface: 2,096,832  
Clamp Surface: 93,128  
Ratio: 4.44  
Reference: Lebedev, 1986, p. 57

0.5 mm

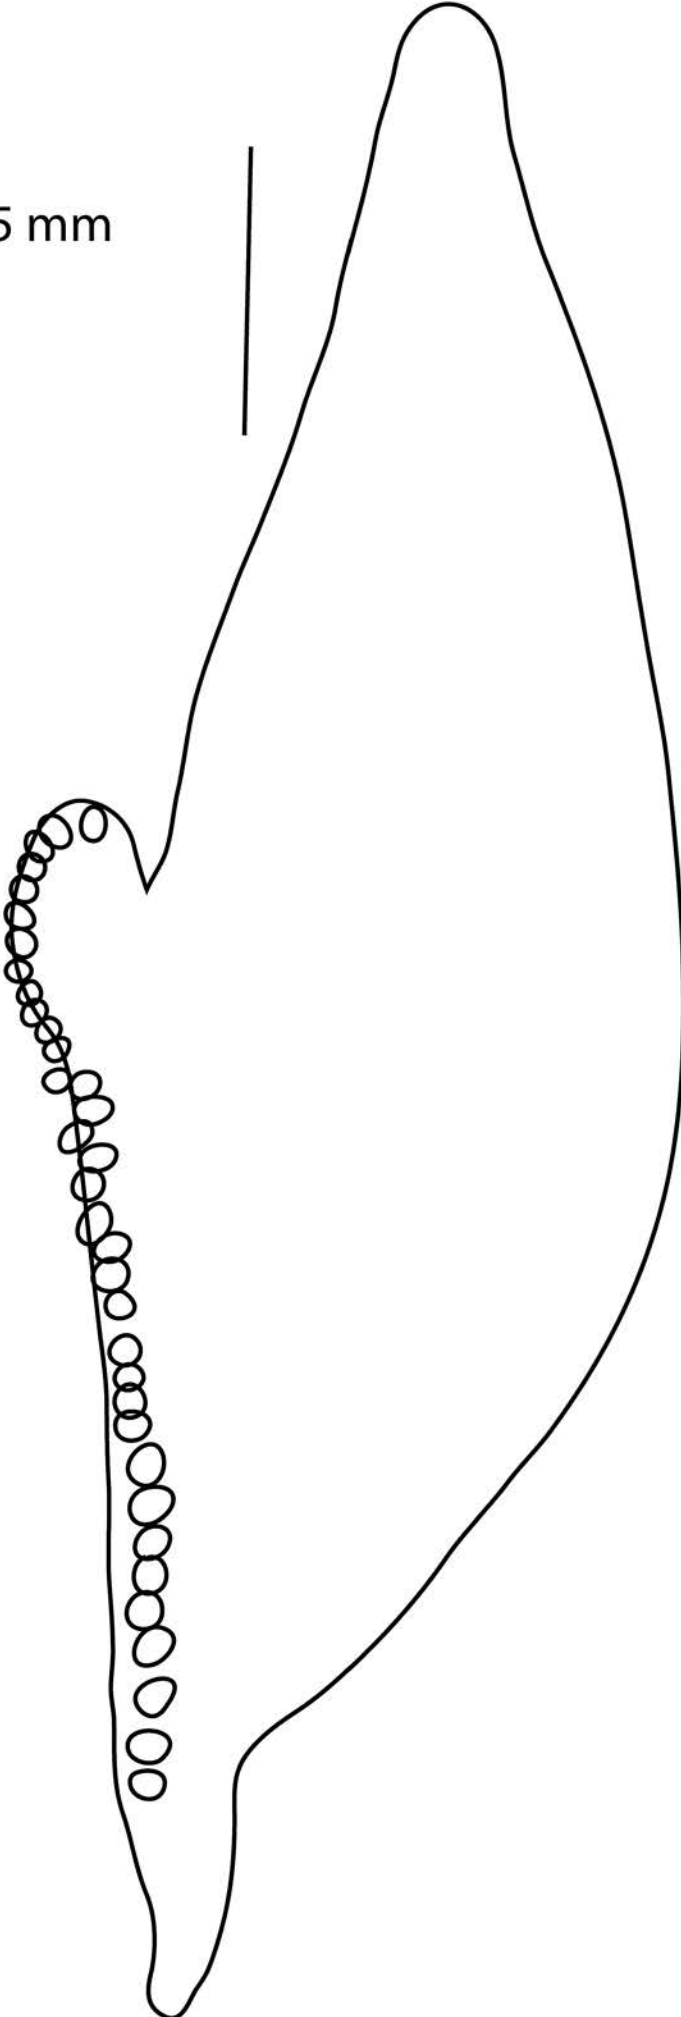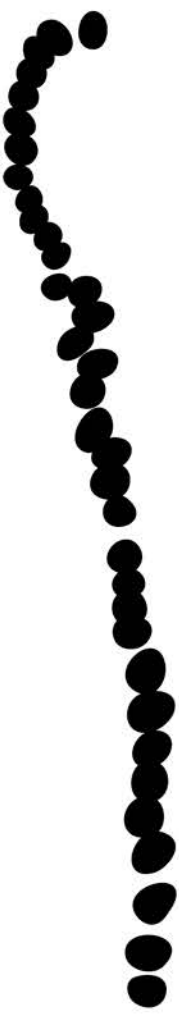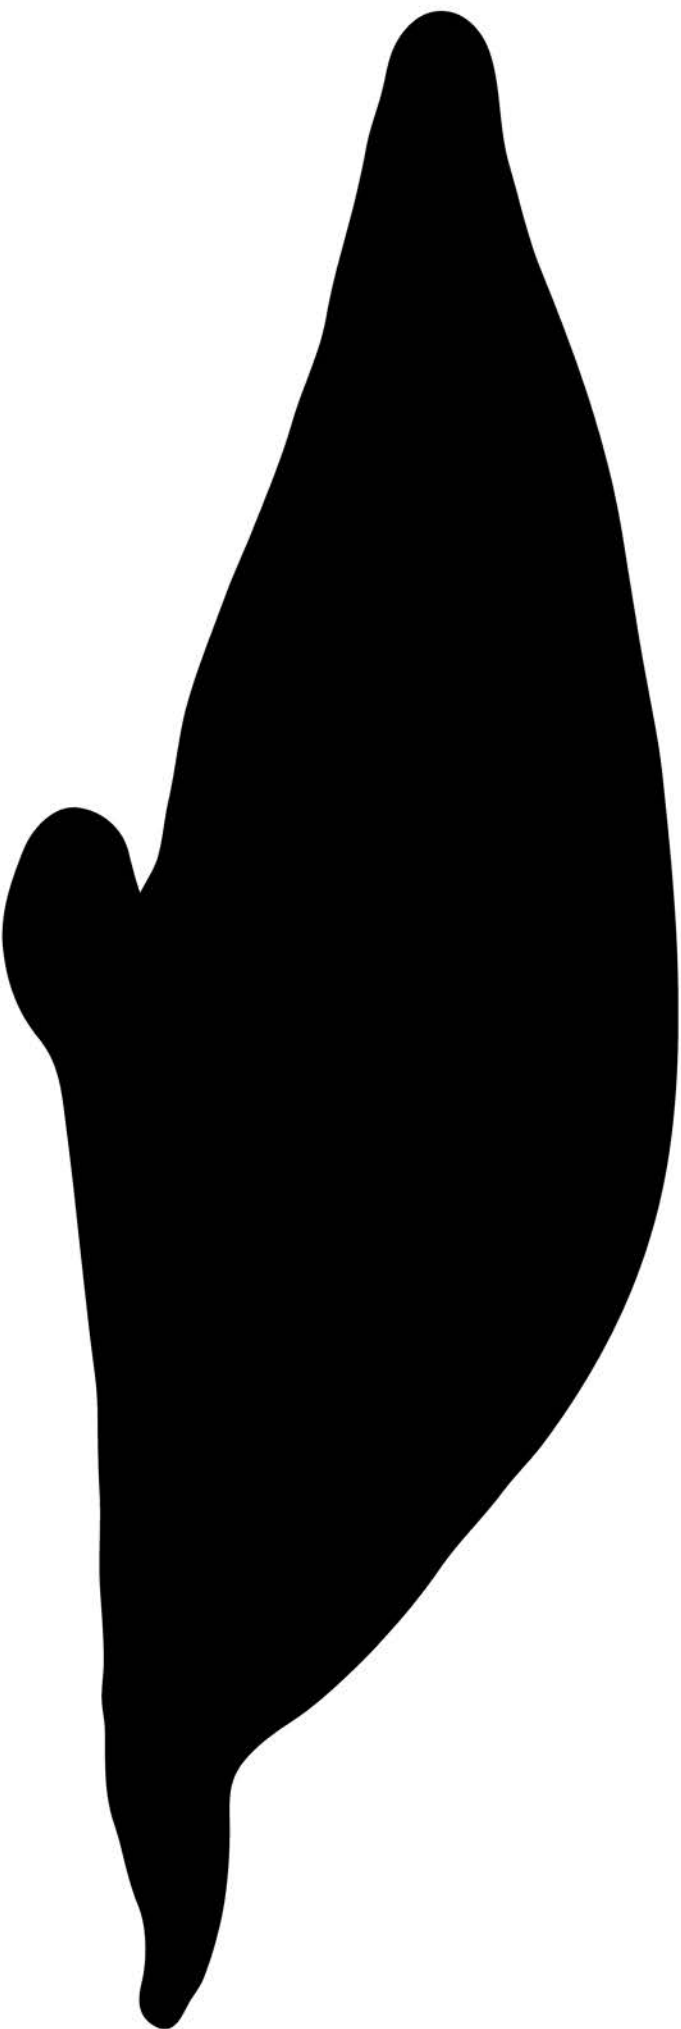

Family: Gastrocotylidae  
Species: *Quadrivalvula asymmetrica* Ghichenok, 1980  
Body surface: 3,430,344  
Clamp surface: 994,784  
Ratio: 29.00  
Reference: Lebedev, 1986, p. 77

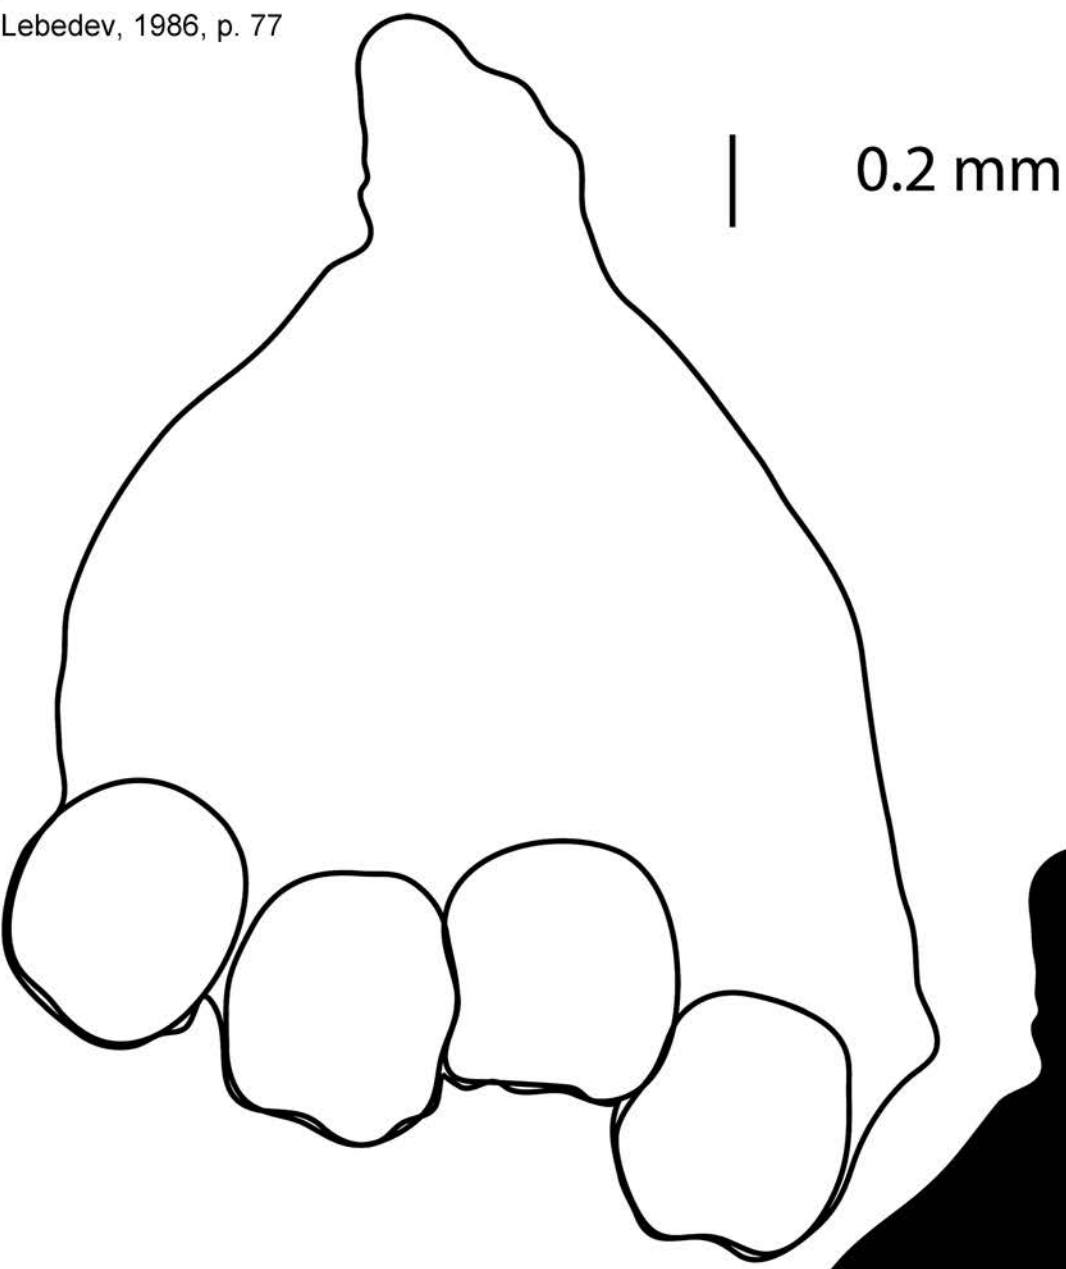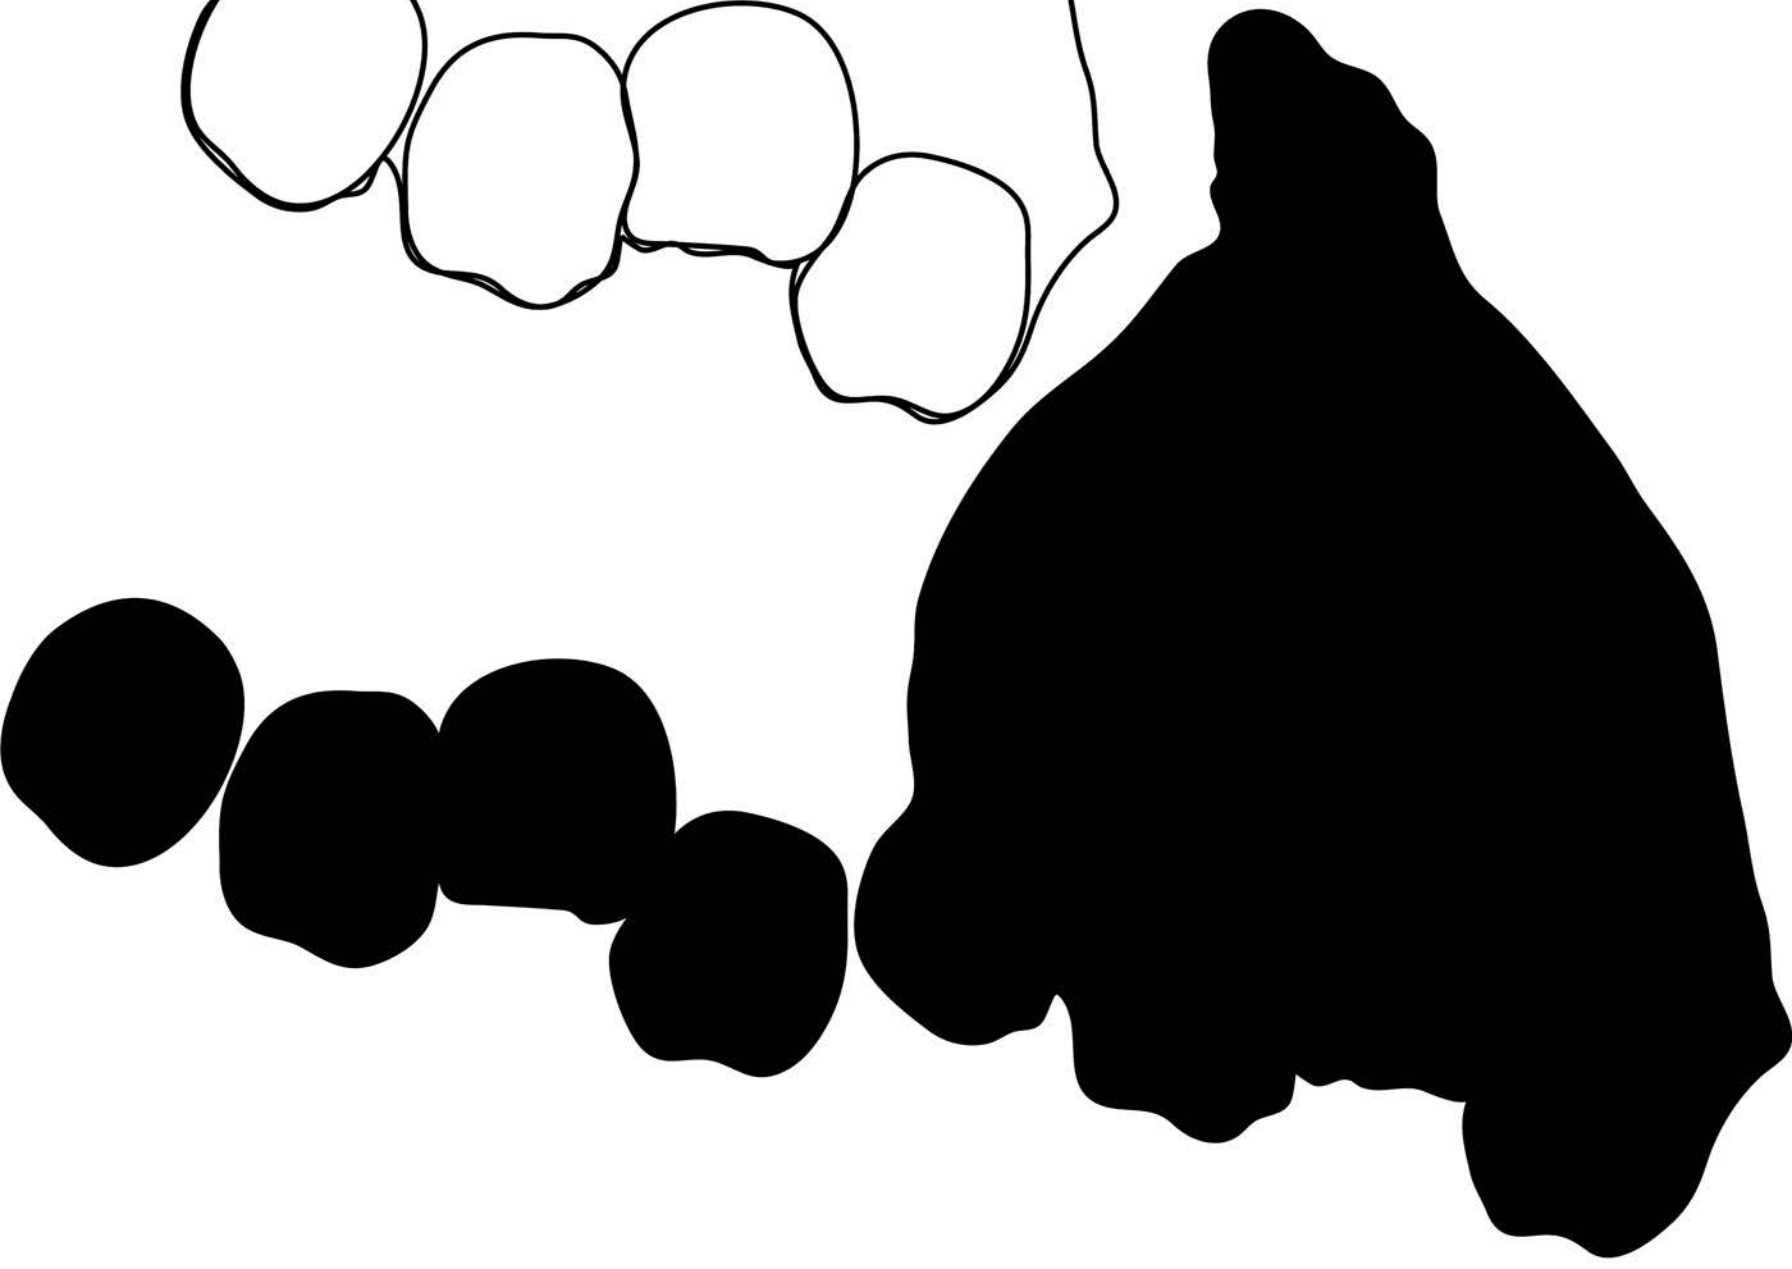

Family: Gastrocotylidae  
Species: *Sibitrema poonui* Yamaguti, 1966  
Body Surface: 15,402,407  
Clamp Surface: 235,741  
Ratio: 1.53  
Reference: Yamaguti, 1966, p. 430

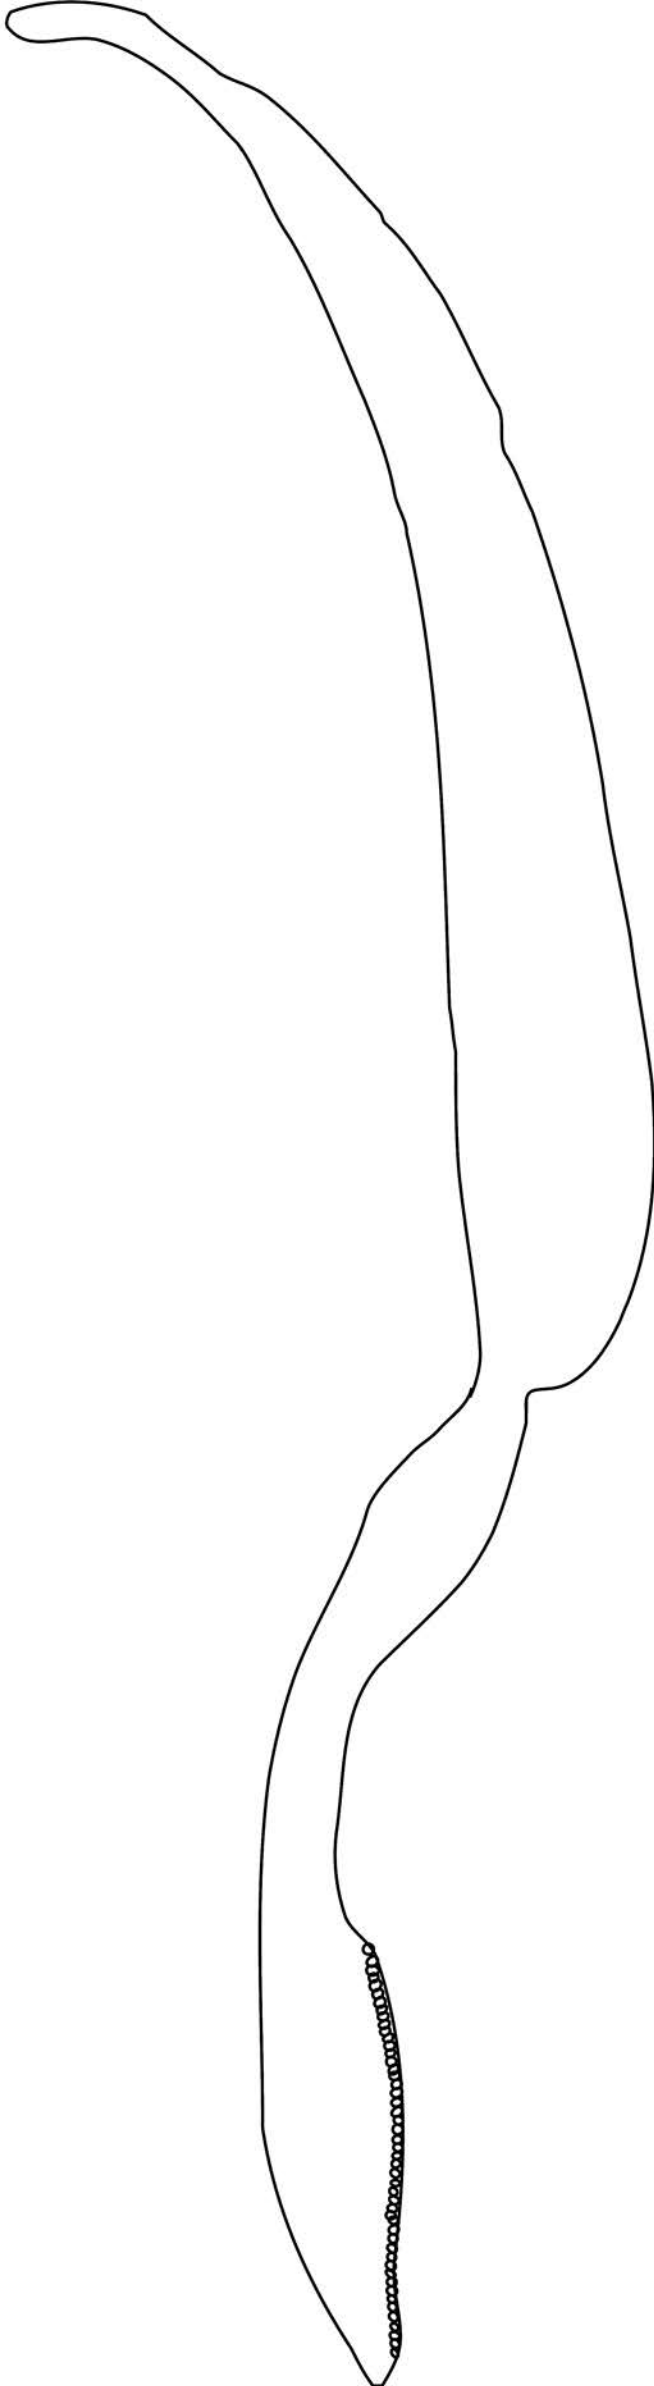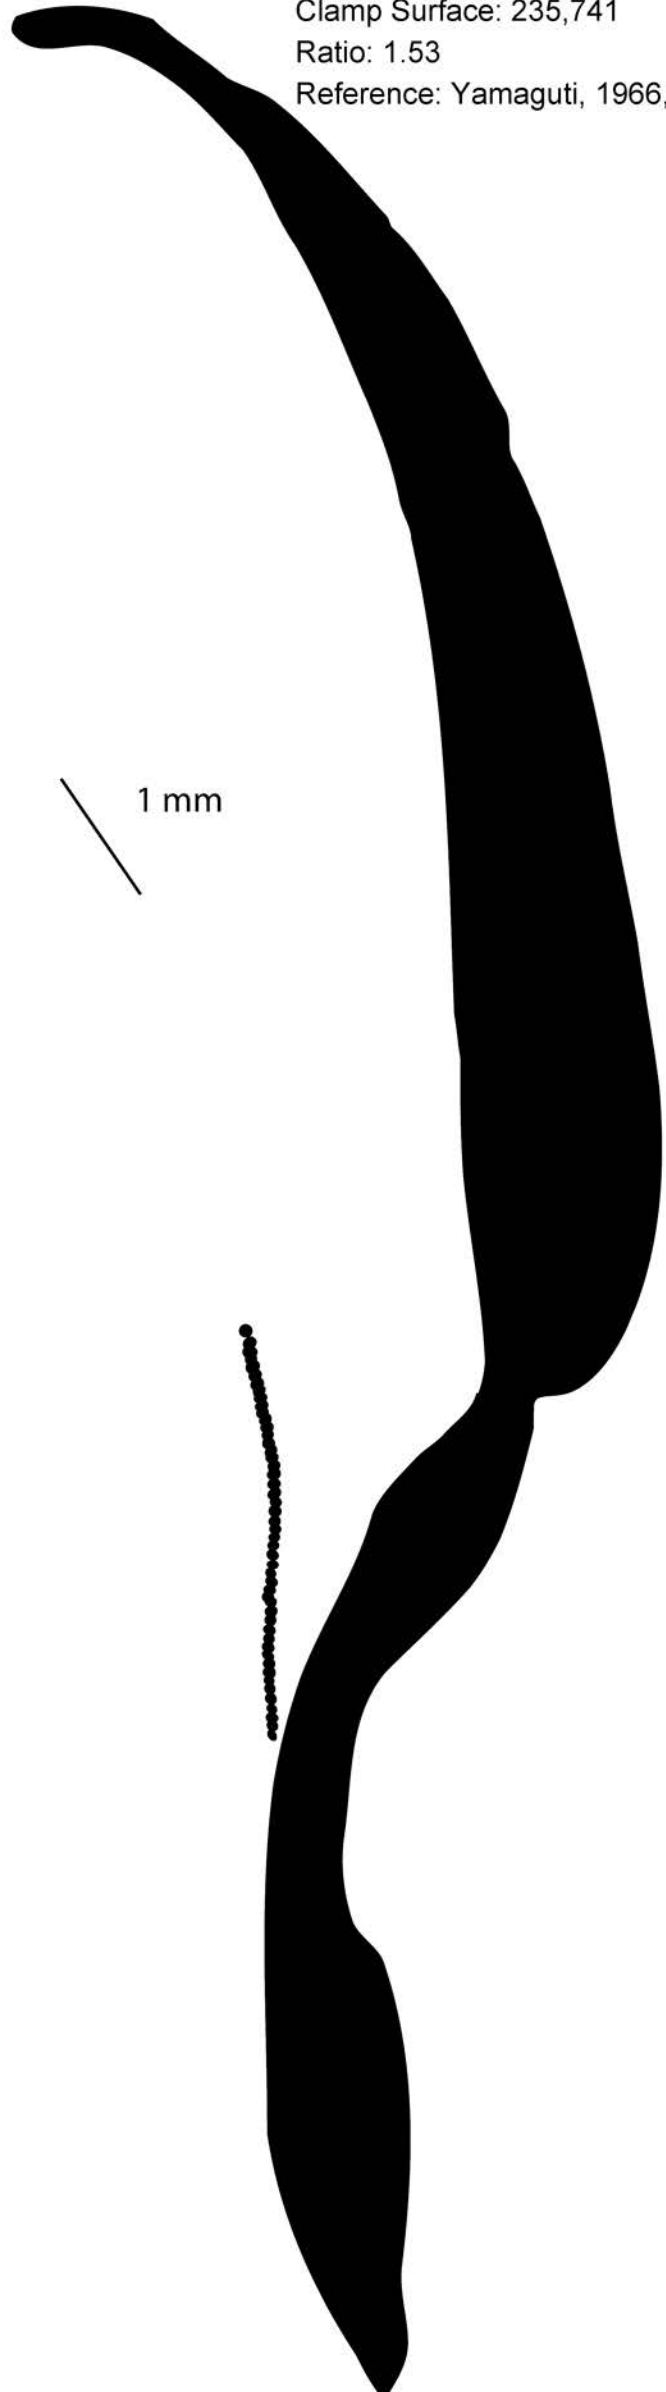



Family: Gotocotylidae  
Species: *Cathucotyle cathuau* Lebedev, 1968  
Body Surface: 1,303,159  
Clamp Surface: 261,873  
Ratio: 20.10  
Reference: Hayward, 1999, p. 450

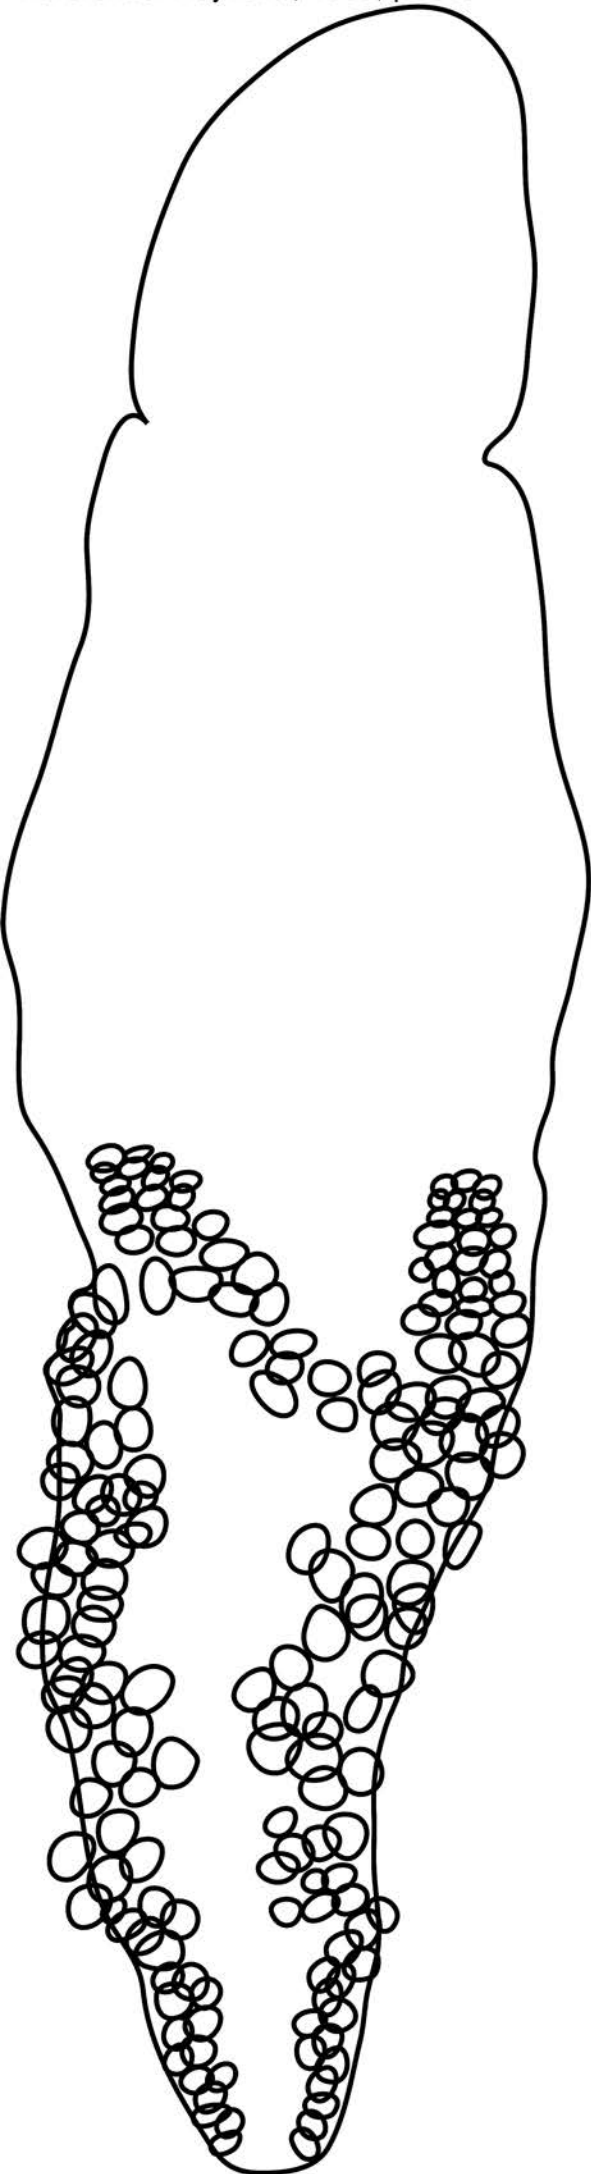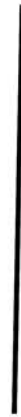

0.5 mm

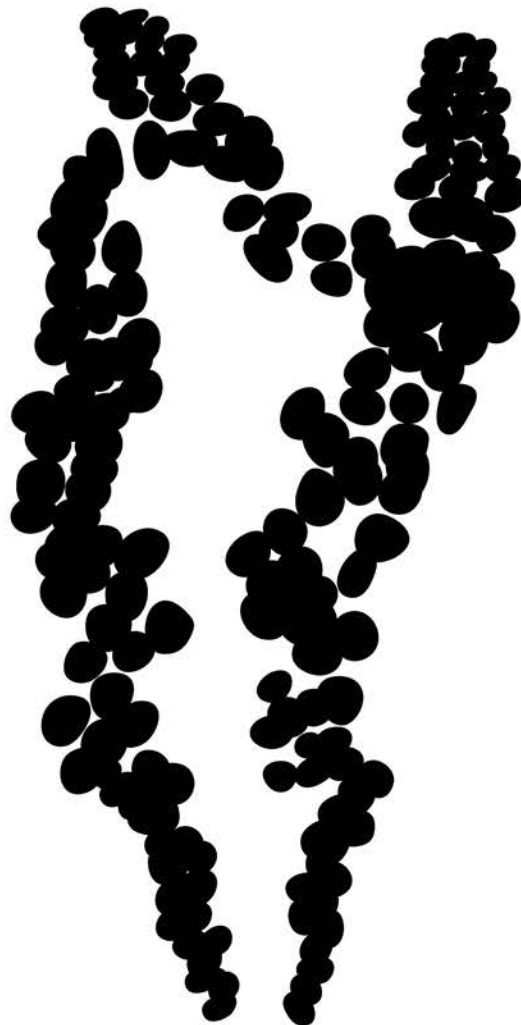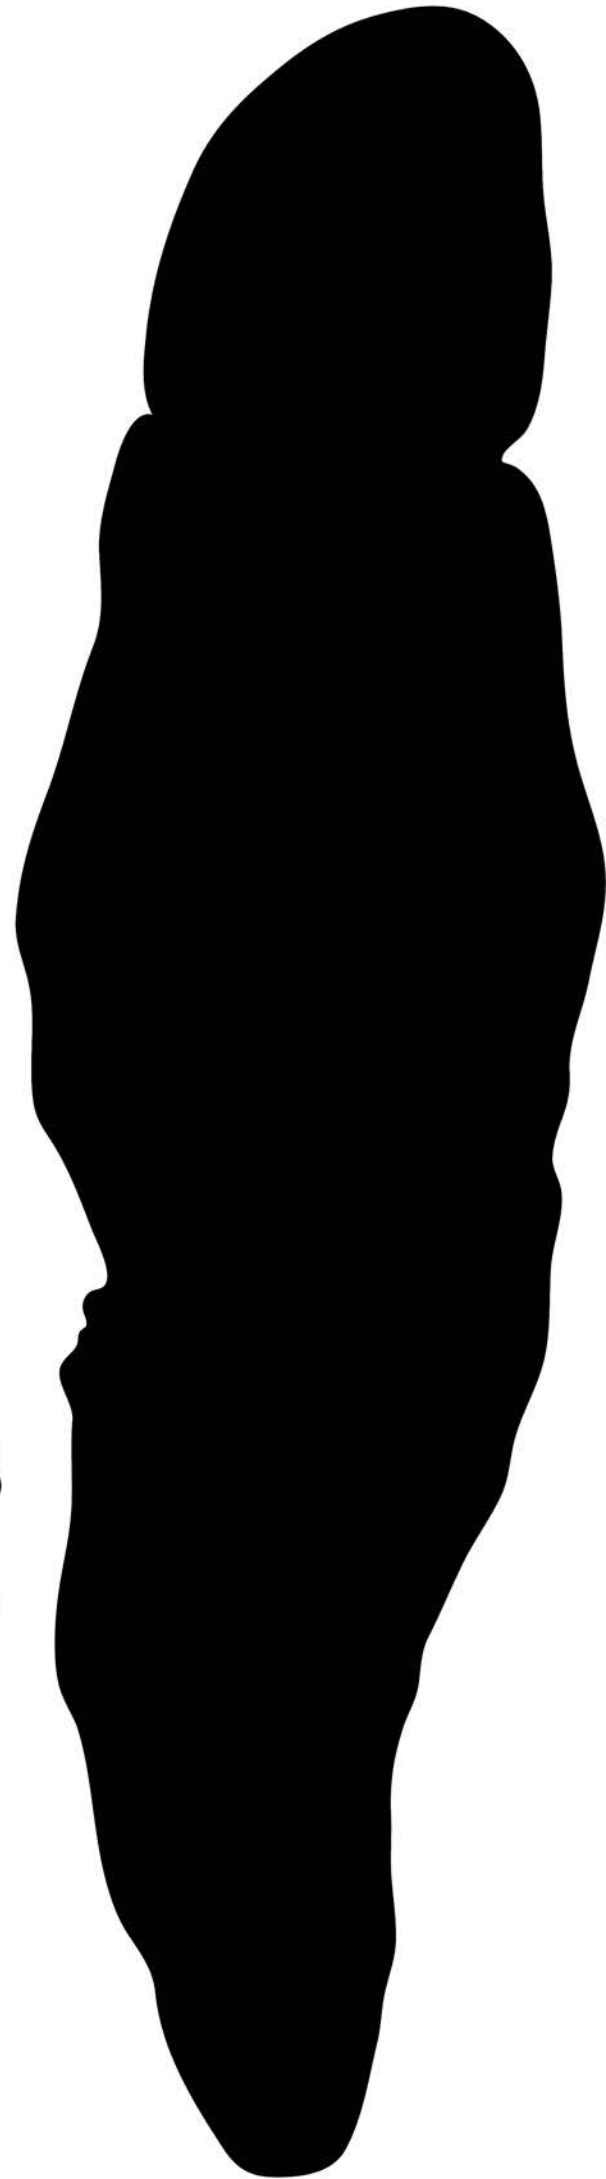

Family: Gotocotylidae  
Species: *Cathucotyle filipinensis*  
Hayward & Rohde, 1999  
Body Surface: 2,971,409  
Clamp Surface: 413,969  
Ratio: 13.93  
Reference: Hayward, 1999, p. 453

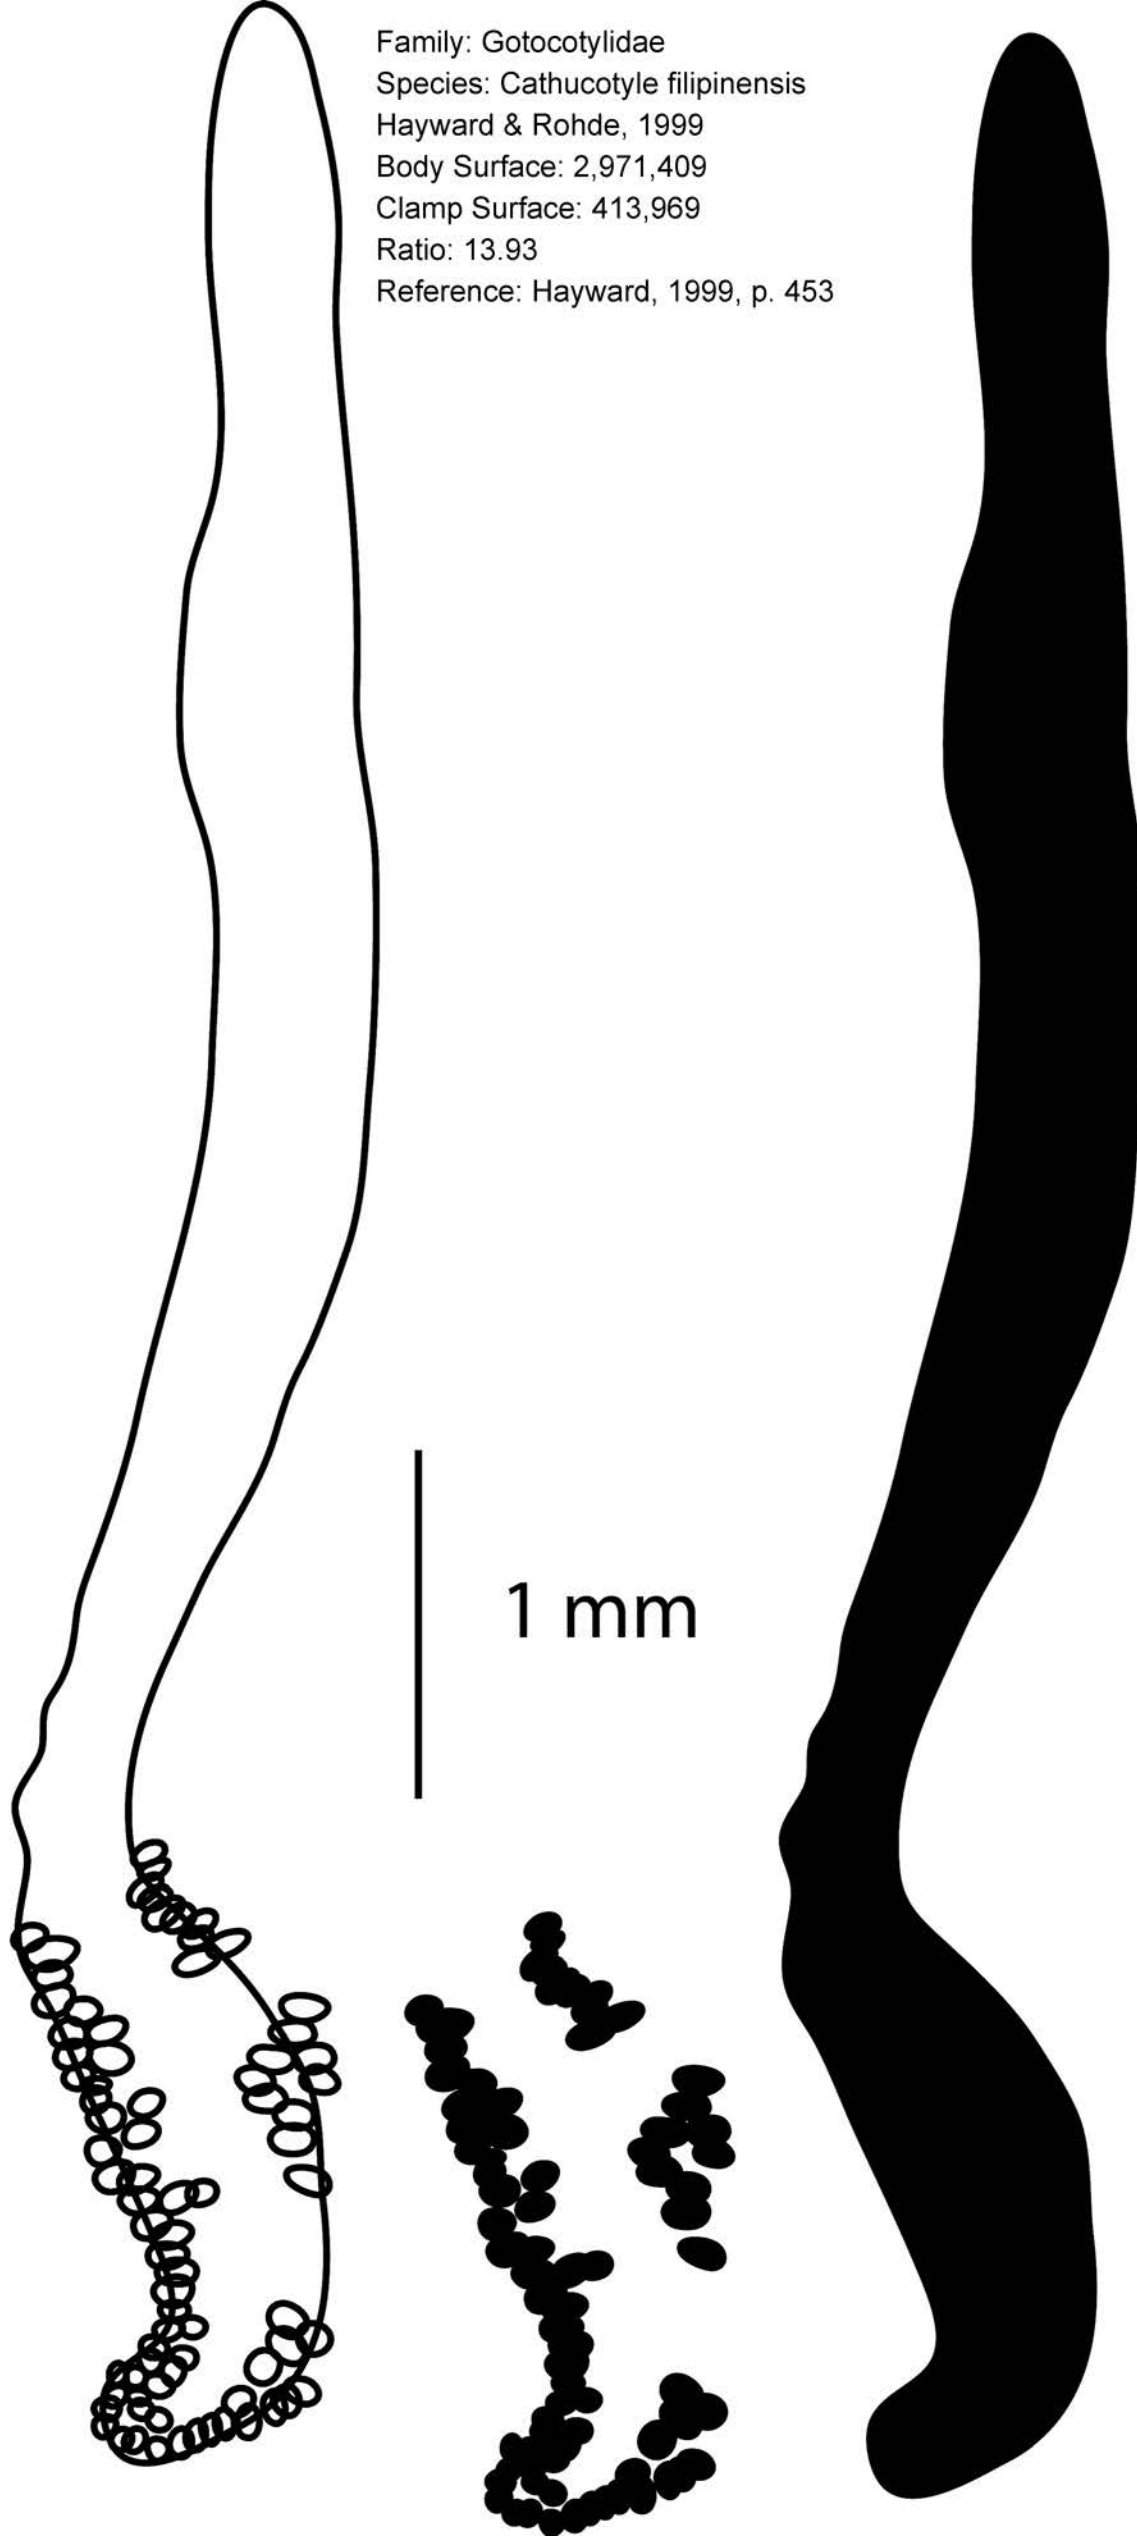

Family: Gotocotylidae

Species: *Cathucotyle sinensis* Hayward & Rohde, 1999

Body Surface: 22,961,031

Clamp Surface: 1,562,400

Ratio: 6.80

Reference: Hayward, 1999, p. 455

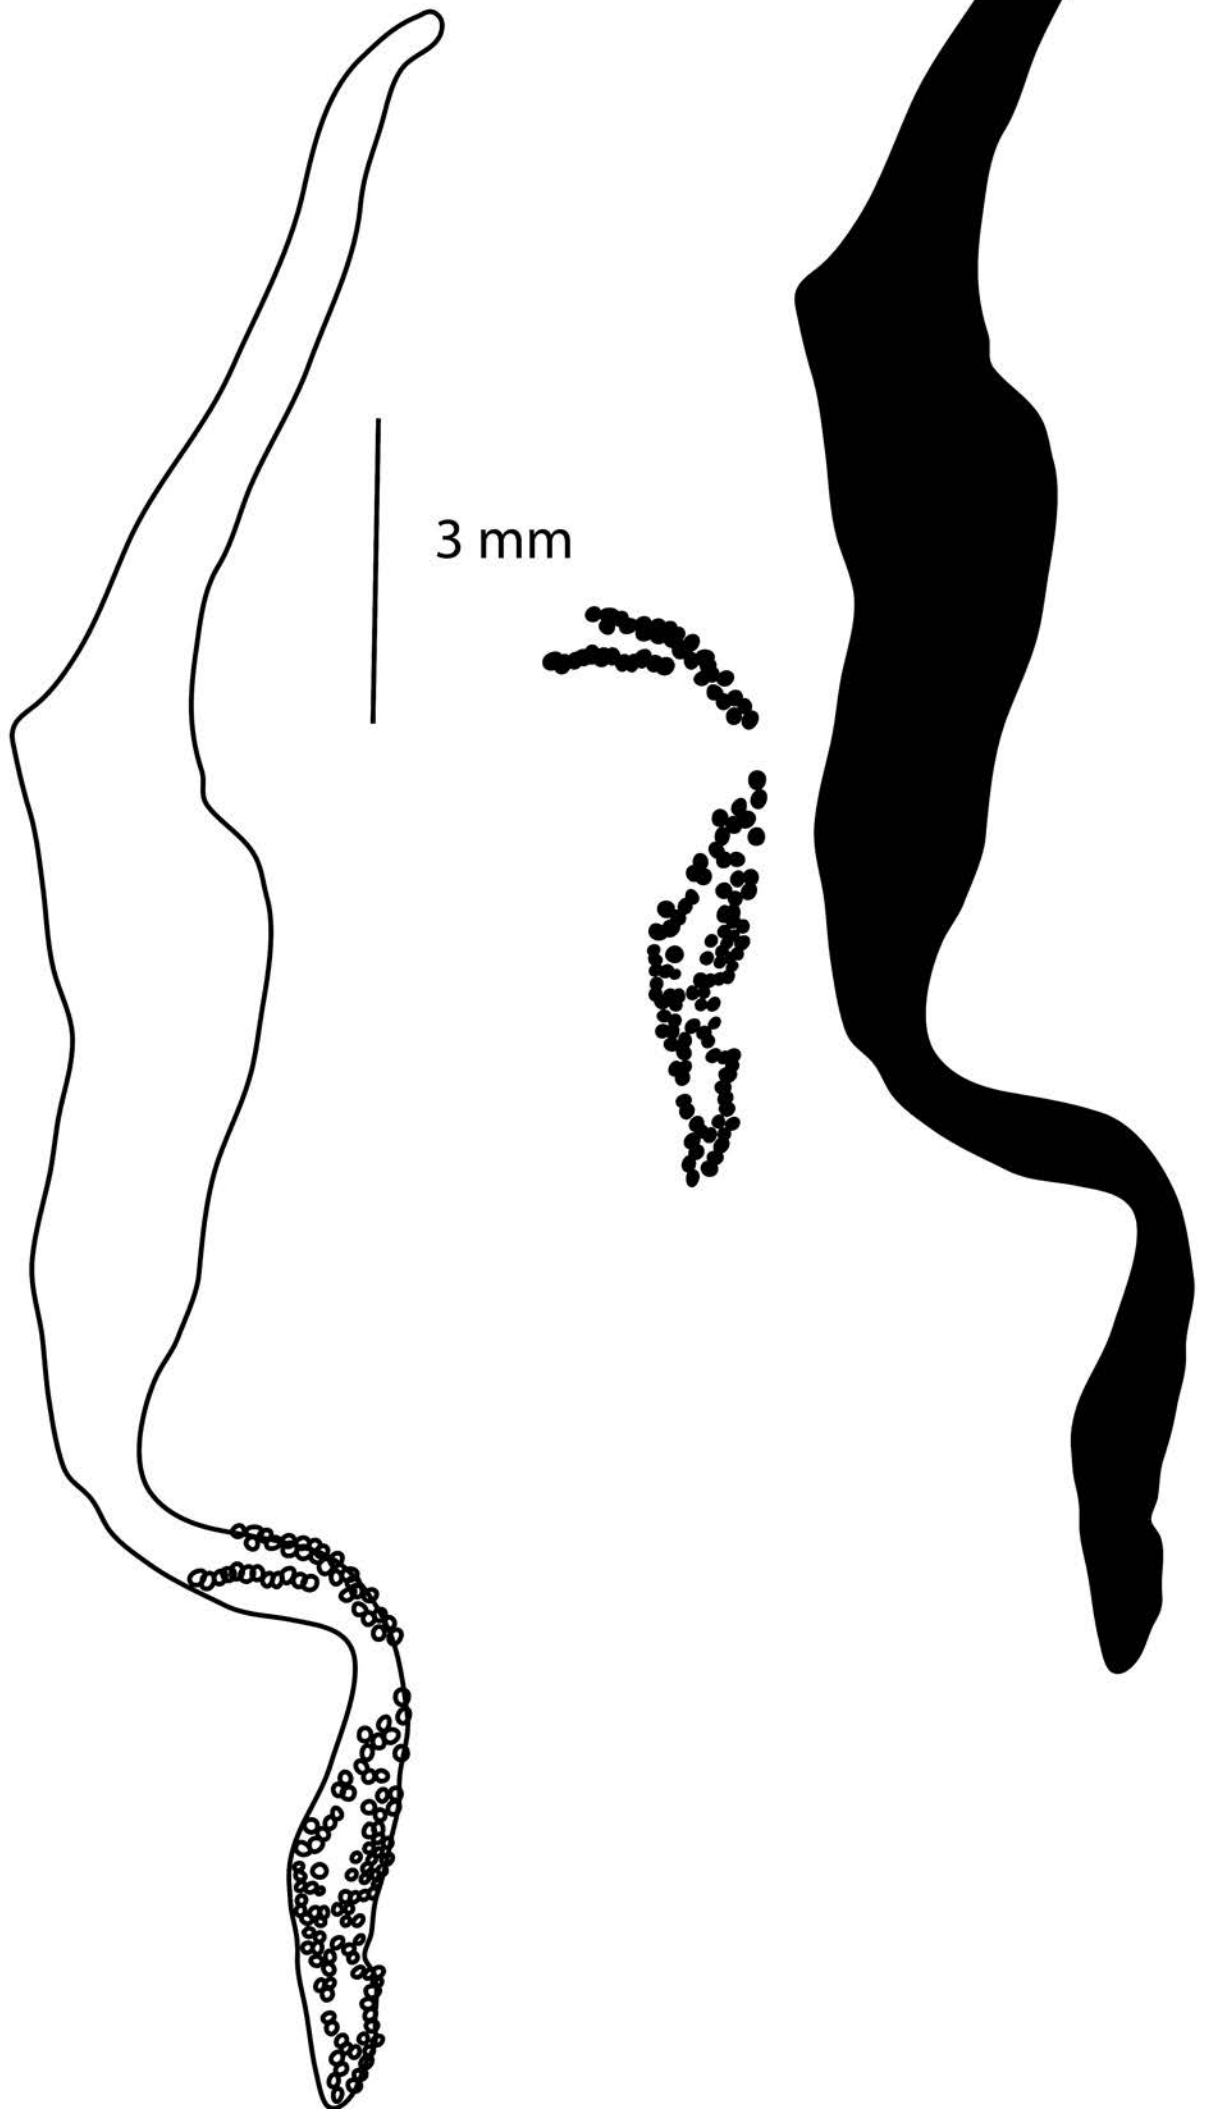

Family: Gotocotylidae

Species: *Gotocotyla acanthura* (Parona & Perugia, 1896) Meserve, 1938

Body Surface: 3,209,235

Clamp Surface: 466,446

Ratio: 14.53

Reference: Hayward, 1999, p. 431

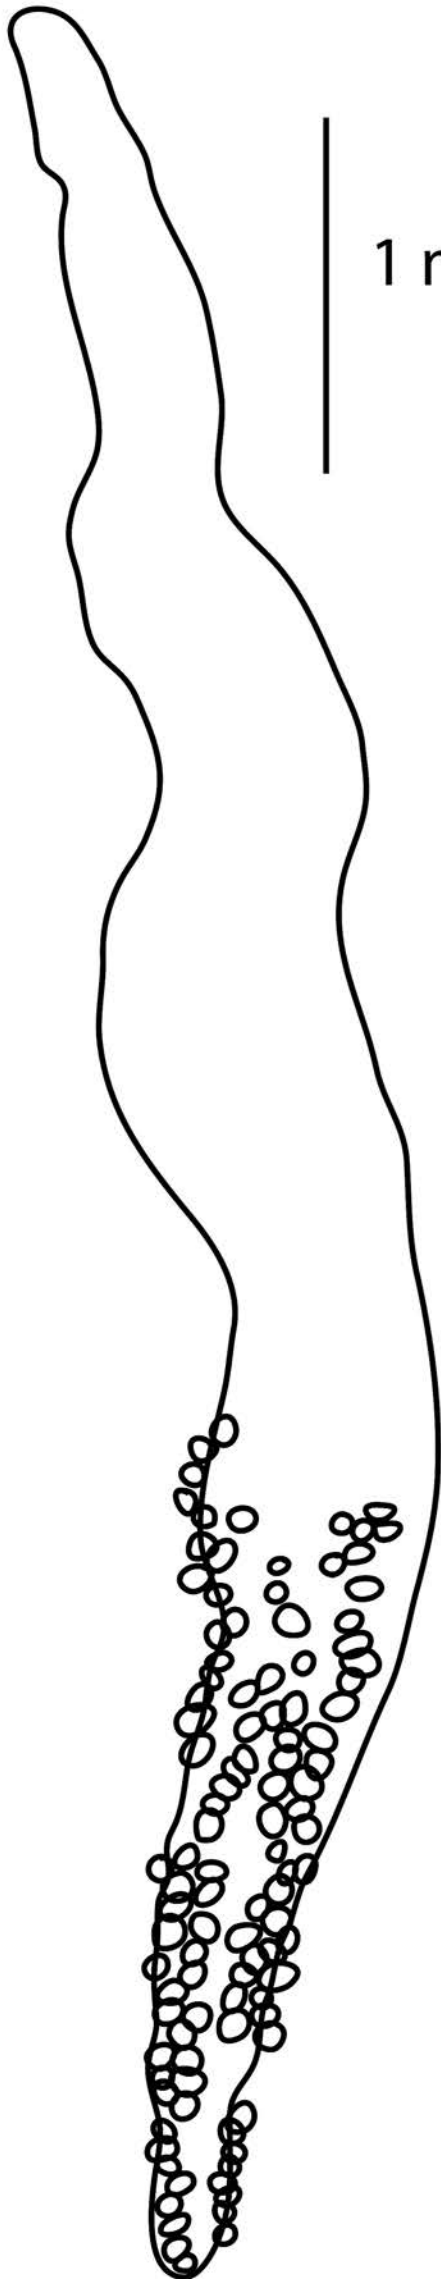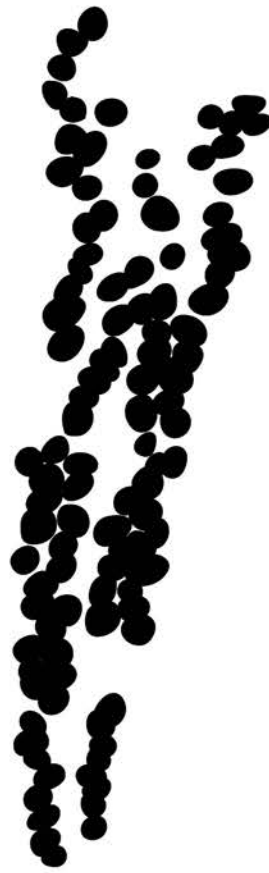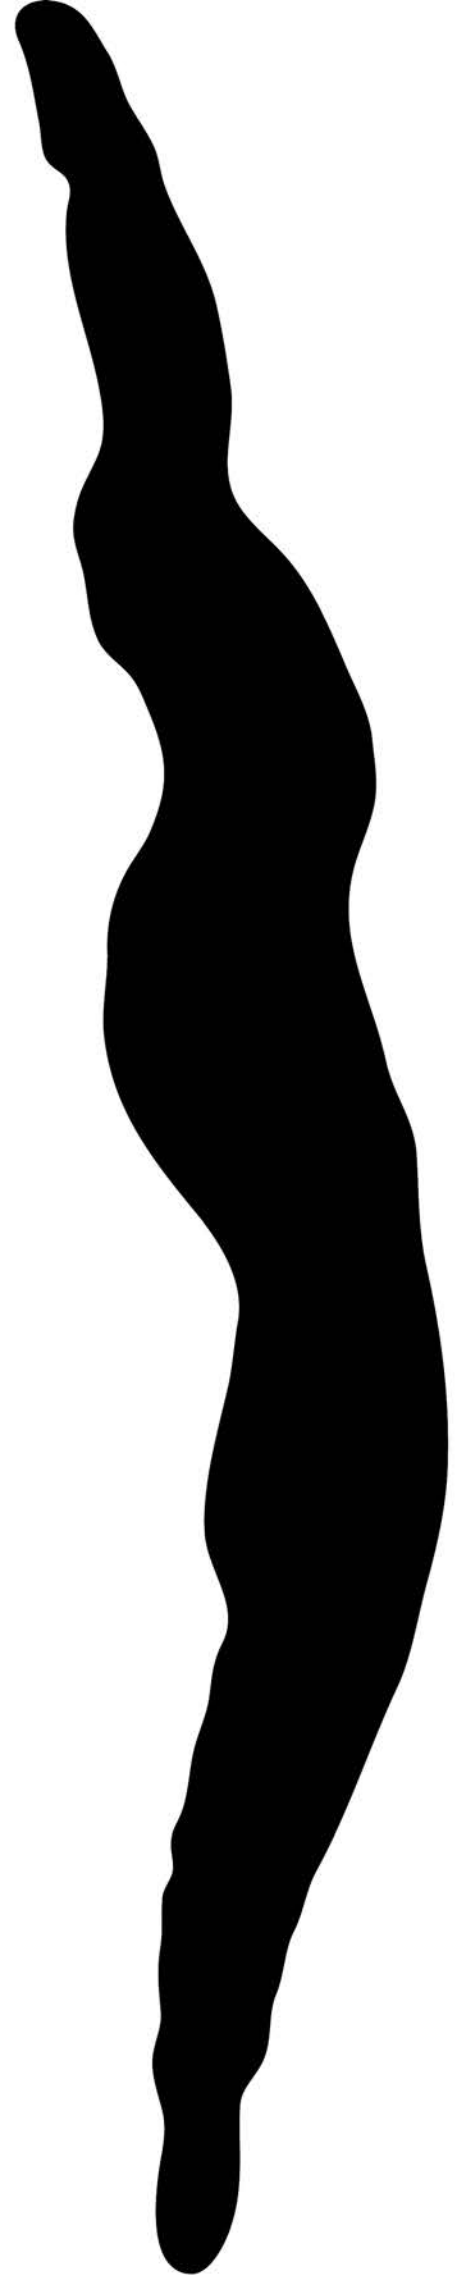

Family: Gotocotylidae  
Species: Gotocotyloa africanensis Hayward & Rohde, 1999  
Body Surface: 2,445,683  
Clamp Surface: 250,315  
Ratio: 10.23  
Reference: Hayward, 1999, p. 438

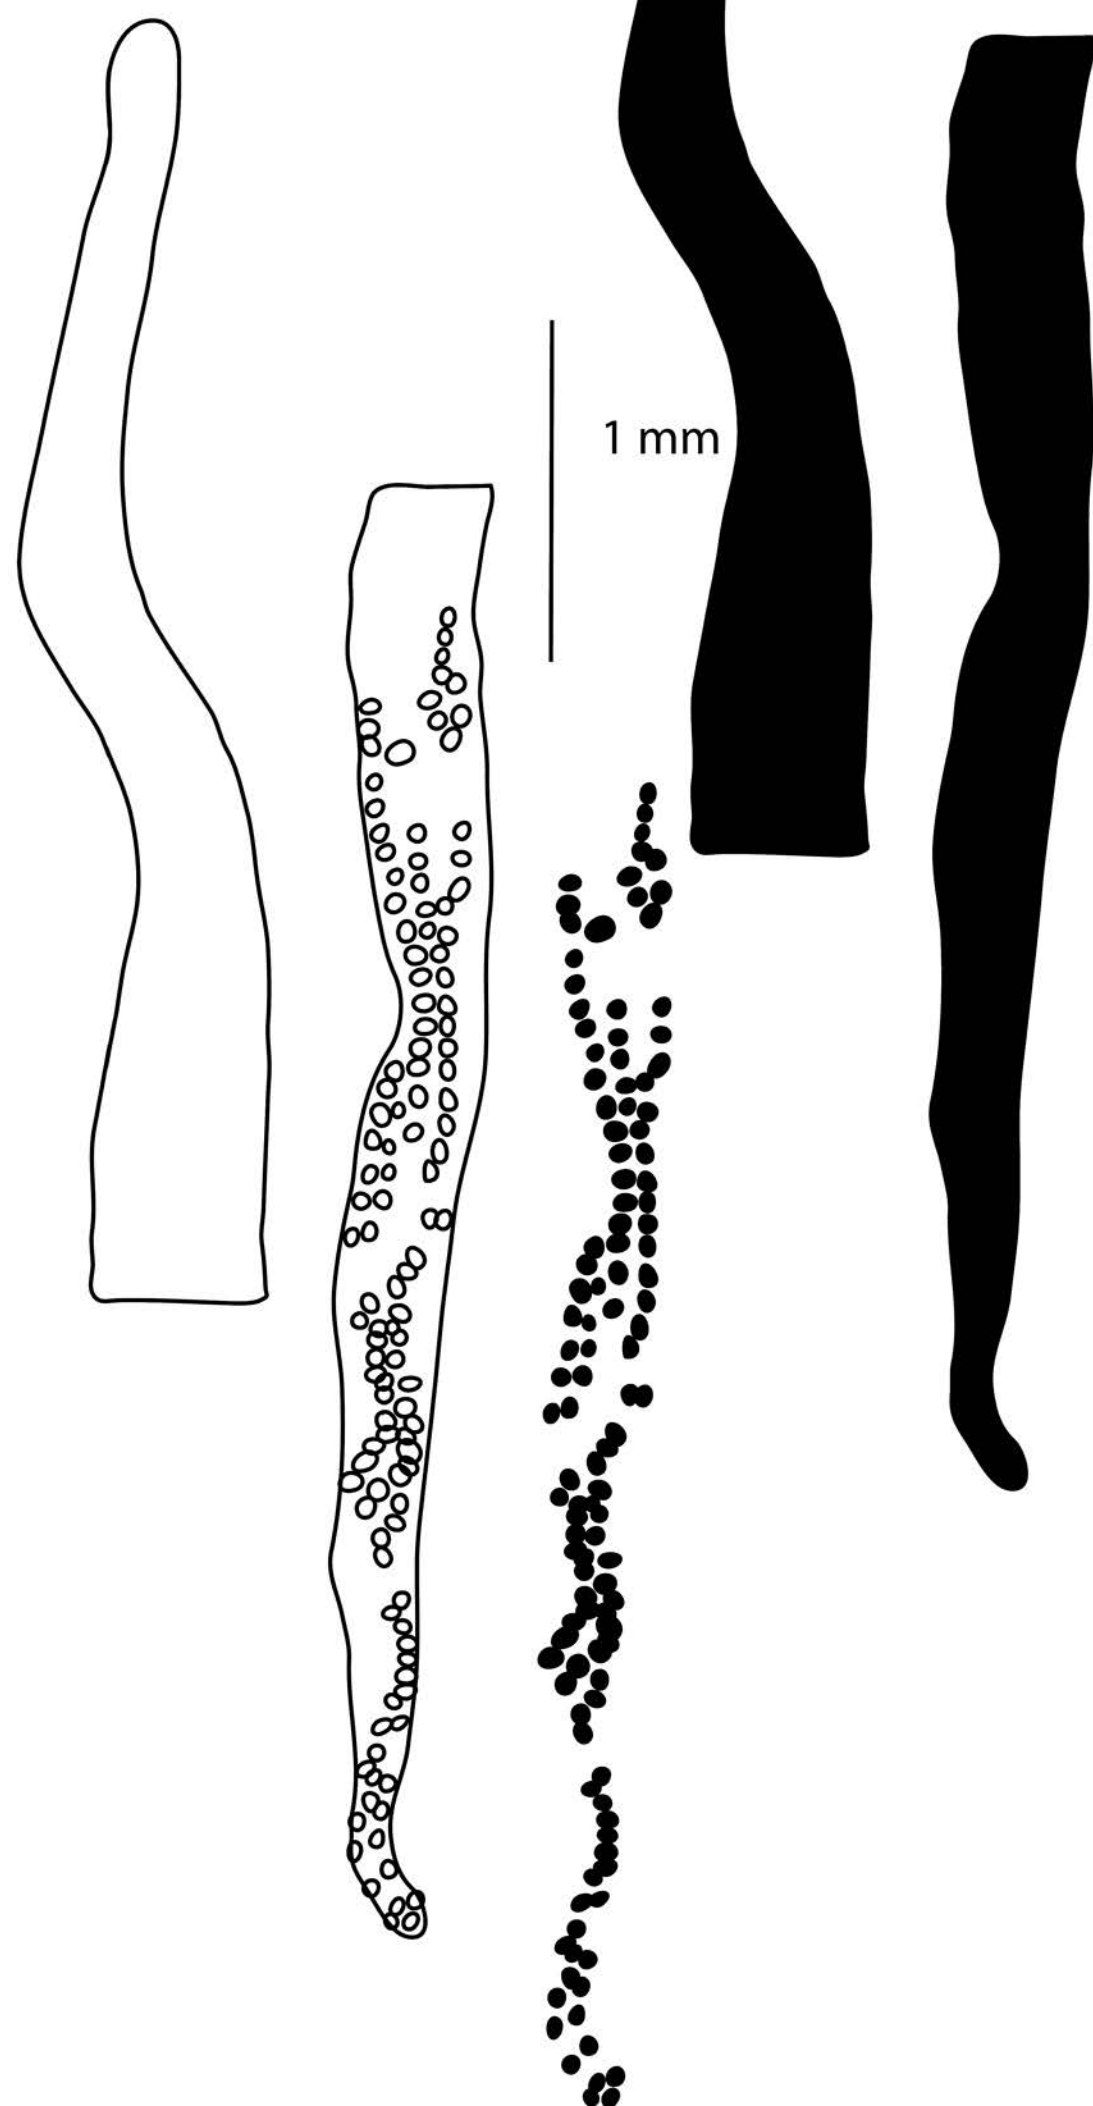

Family: Gotocotylidae  
Species: *Gotocotyloa bivaginalis* (Ramalingam, 1961) Rohde, 1976  
Body Surface: 7,414,296  
Clamp Surface: 274,996  
Ratio: 3.71  
Reference: Hayward, 1999, p. 440

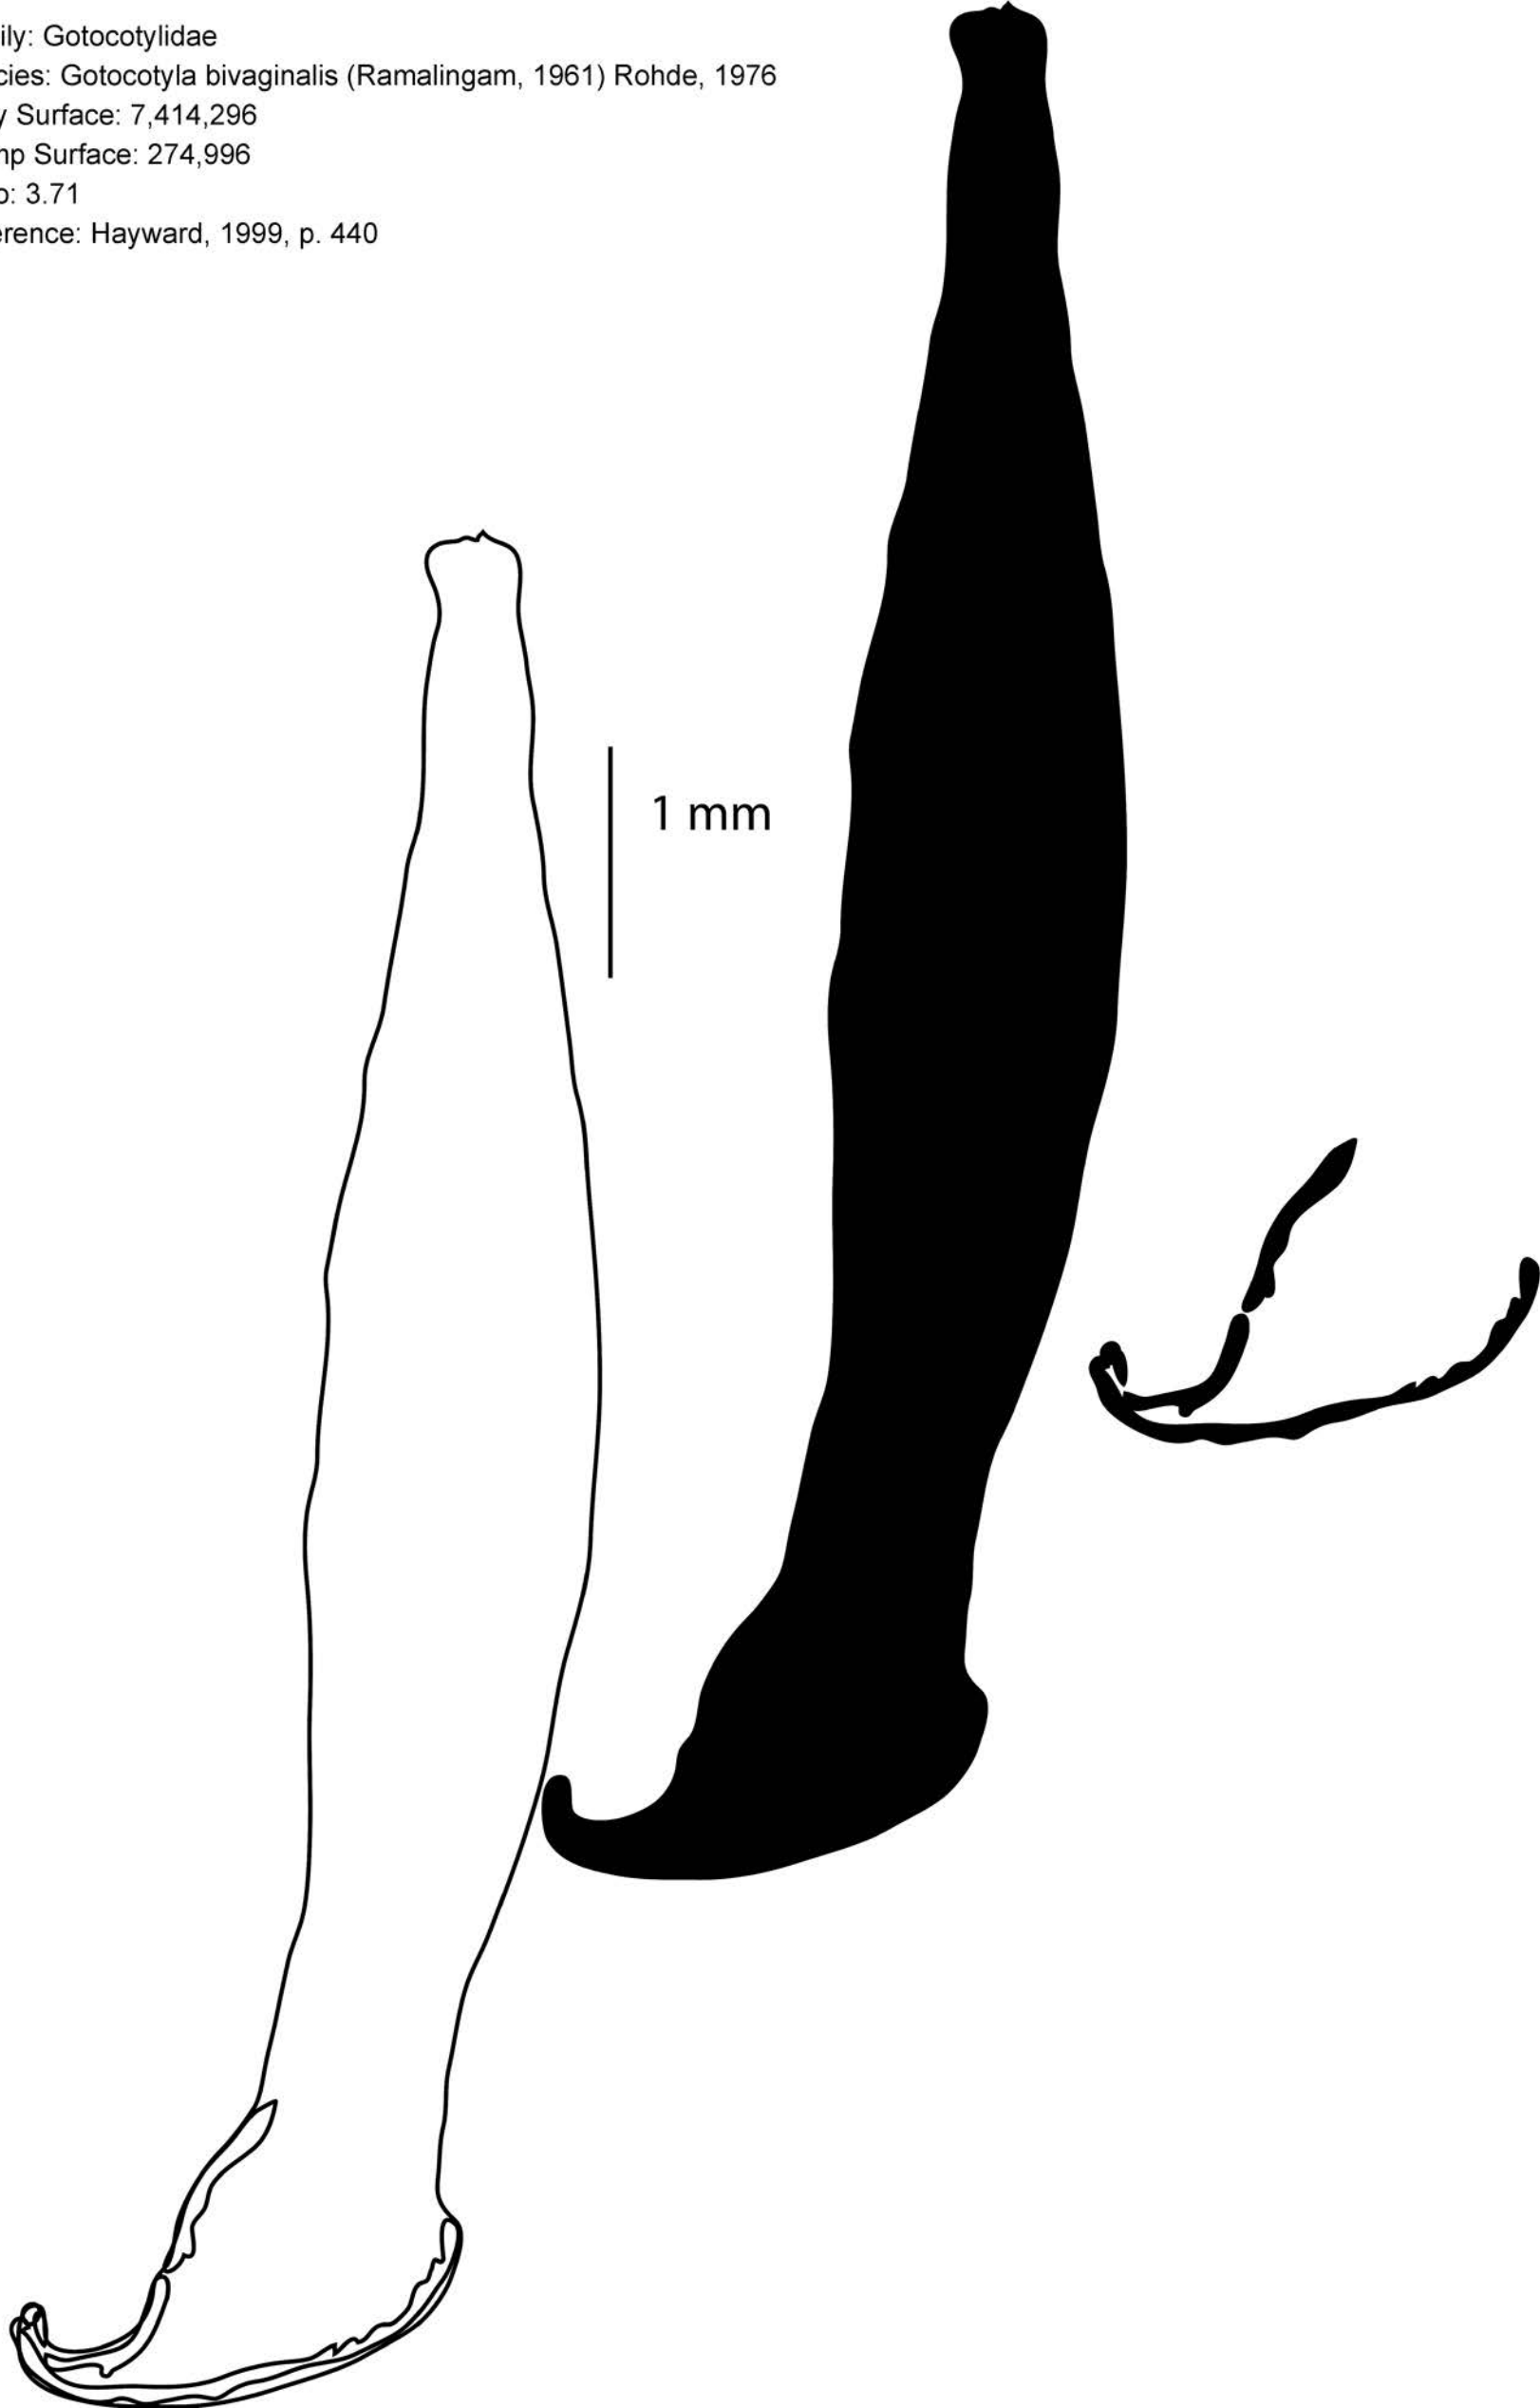

Family: Gotocotylidae

Species: *Gotocotyla heapae* Hayward & Rohde, 1999

Body Surface: 1,291,877

Clamp Surface: 69,182

Ratio: 5.36

Reference: Hayward, 1999, p. 443

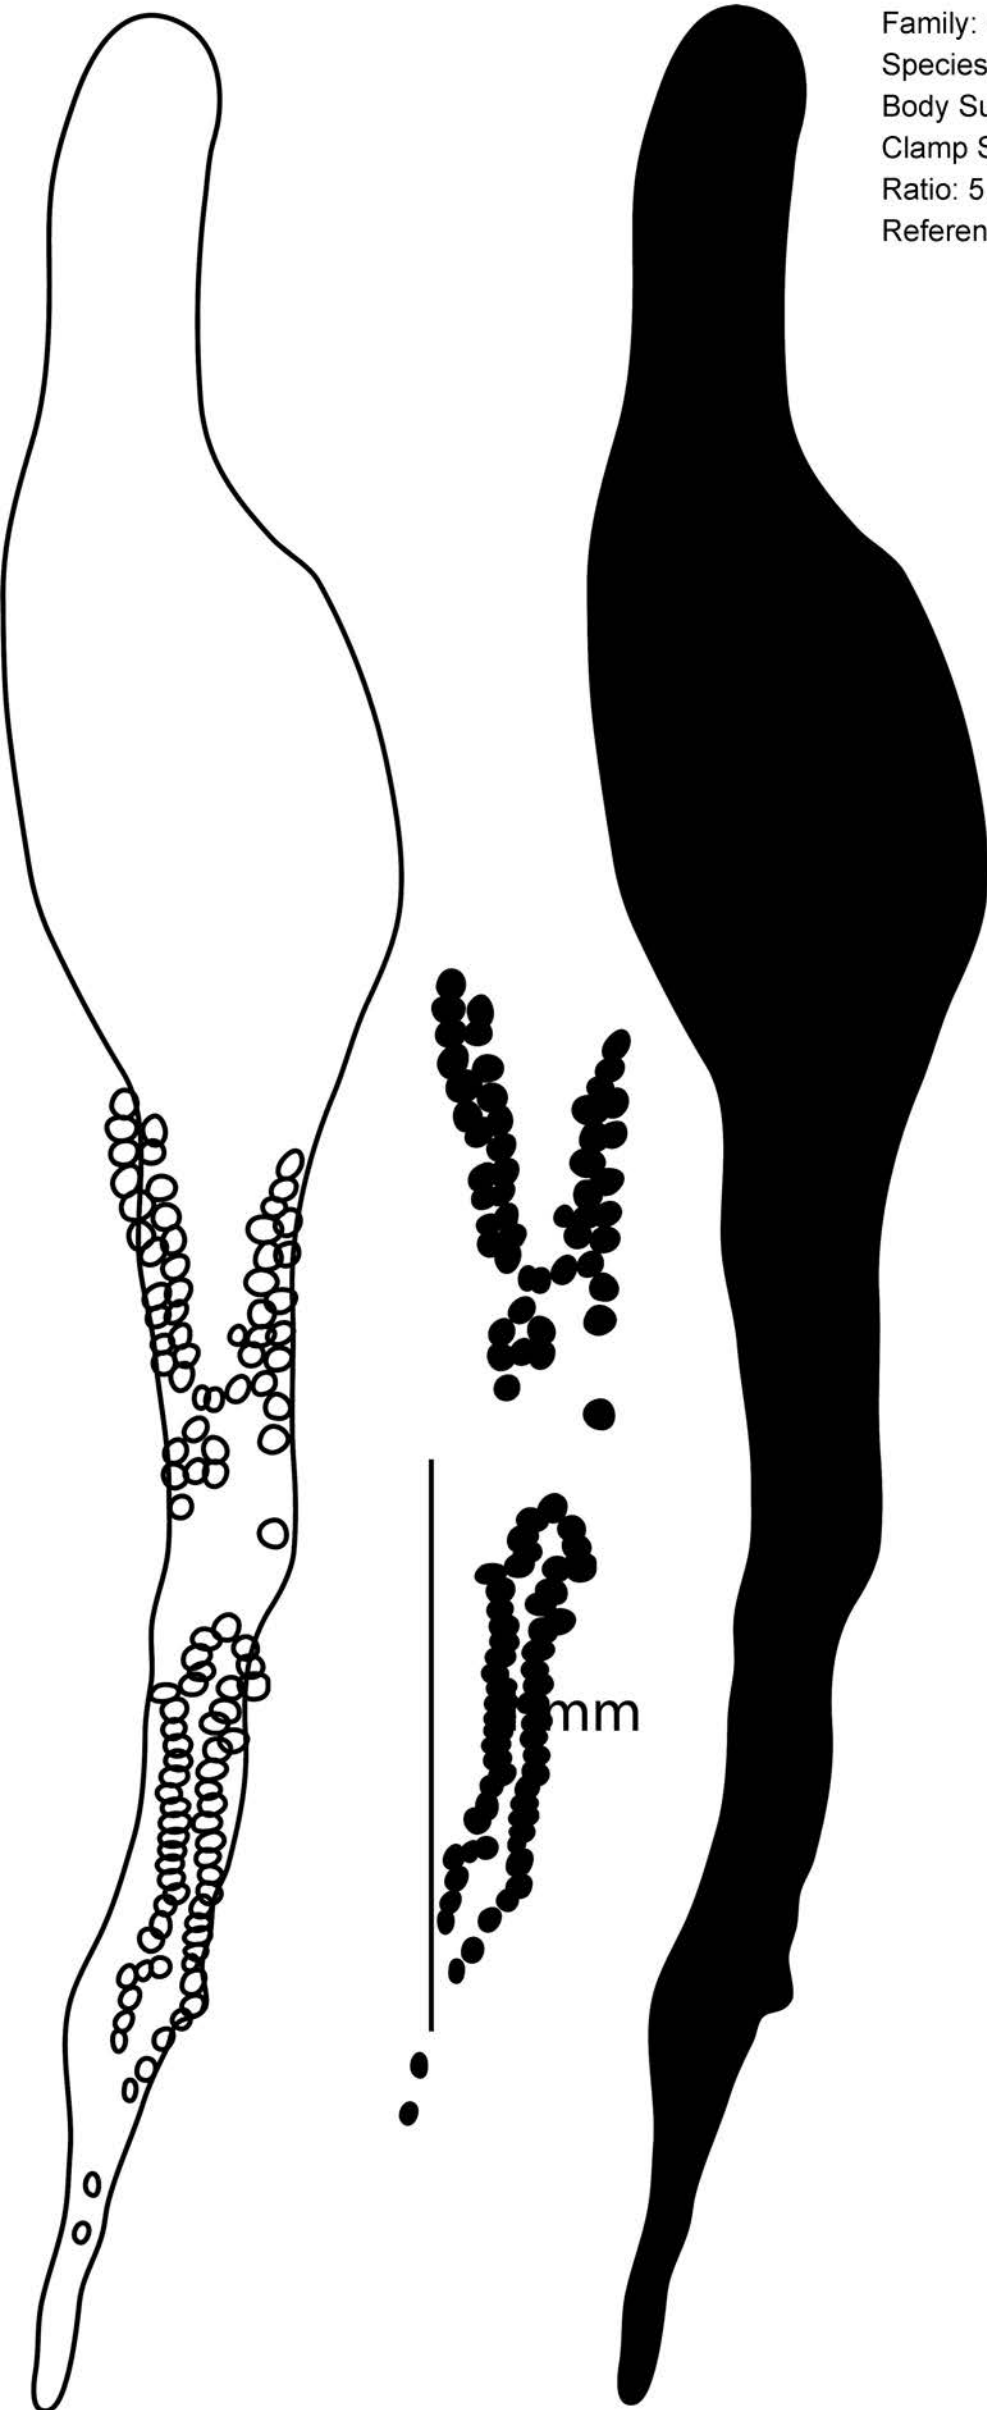

Family: Gotocotylidae  
Species: *Gotocotyla meservei* Yamaguti, 1953  
Body Surface: 1,314,267  
Clamp Surface: 179,701  
Ratio: 13.67  
Reference: Yamaguti, 1953, p. 56

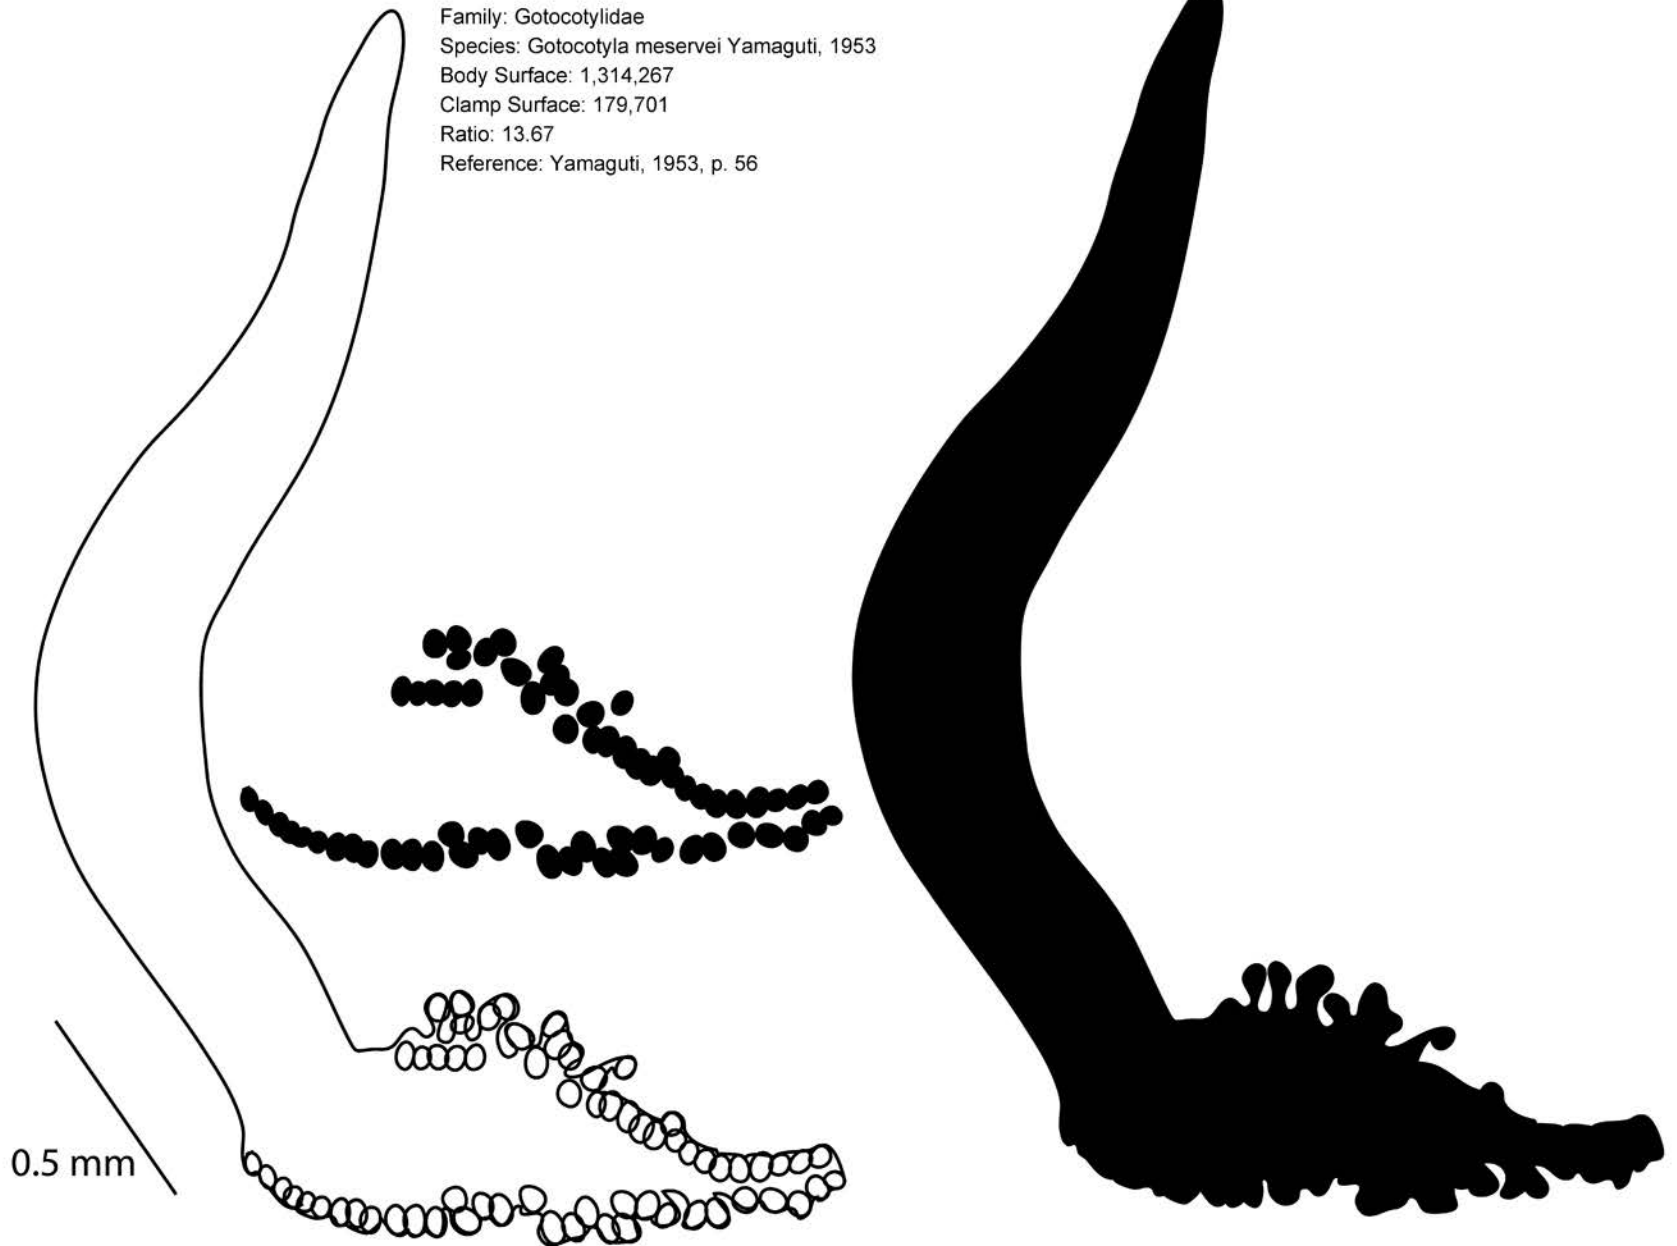



Family: Gotocotylidae  
Species: *Gotocotyla niphonii*  
Hayward & Rohde, 1999  
Body Surface: 1,932,305  
Clamp Surface: 171,386  
Ratio: 8.87  
Reference: Hayward, 1999, p. 445

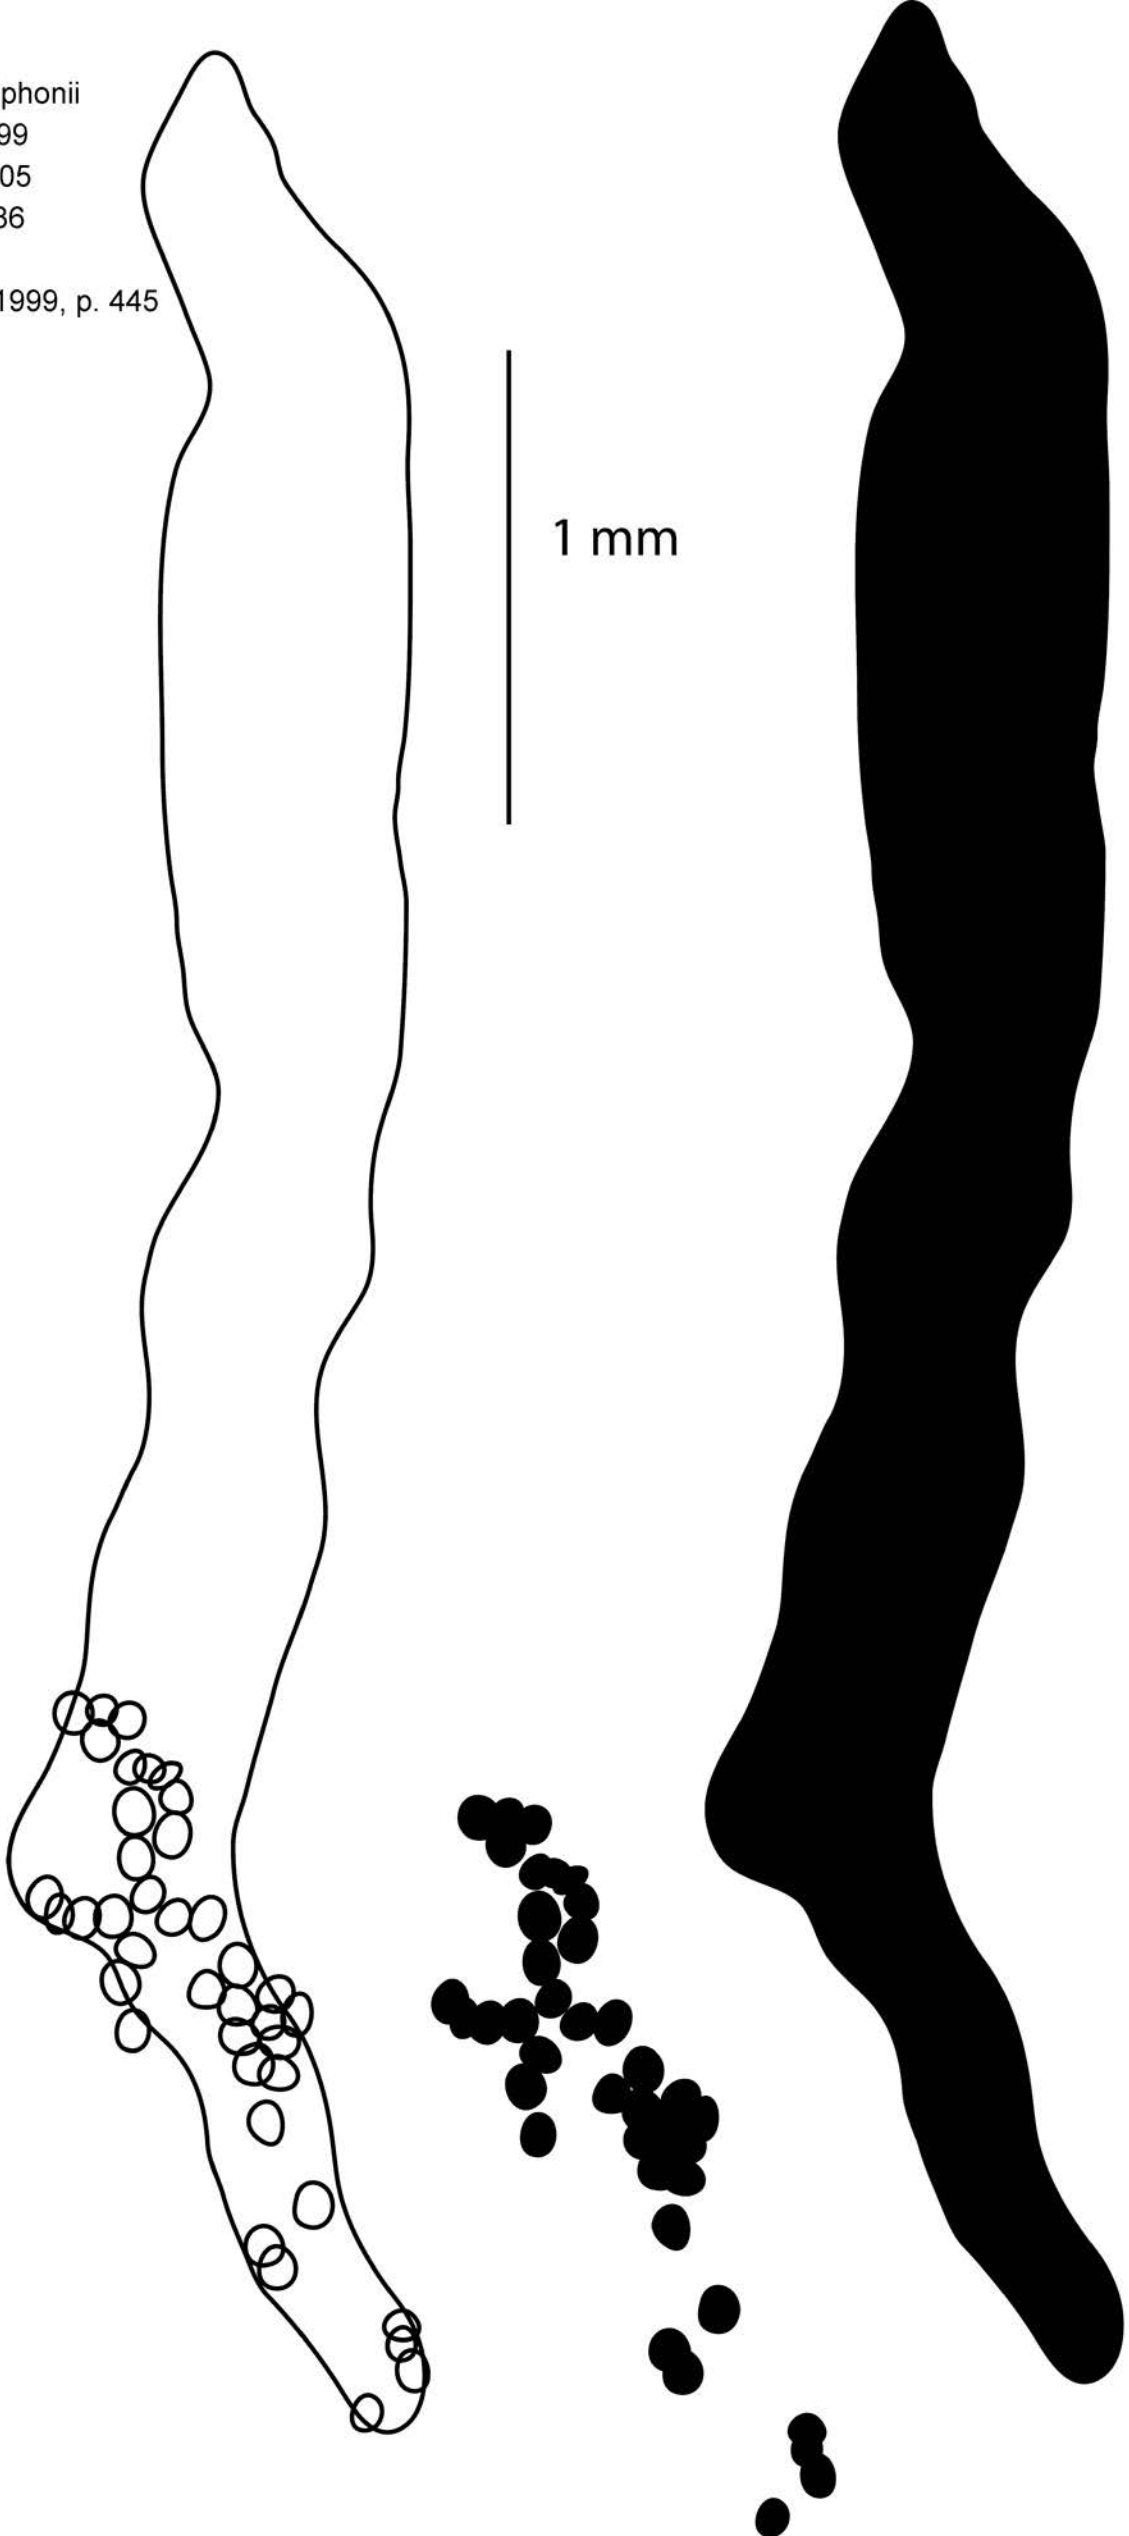

Family: Gotocotylidae

Species: *Gotocotyloa queenslandici* Hayward & Rohde, 1999

Body Surface: 1,321,566

Clamp Surface: 258,123

Ratio: 19.53

Reference: Hayward, 1999, p. 447

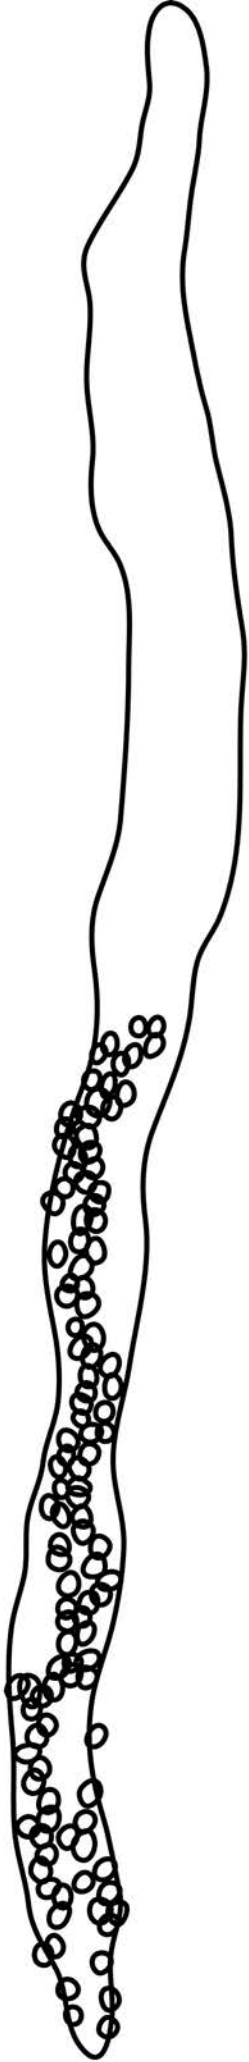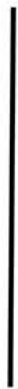

1 mm

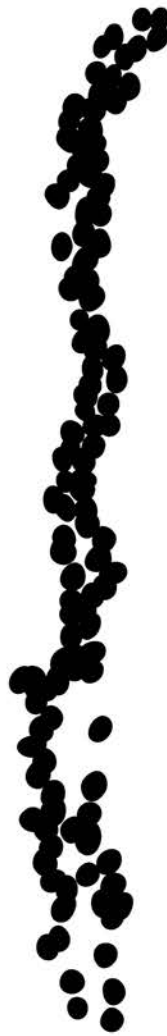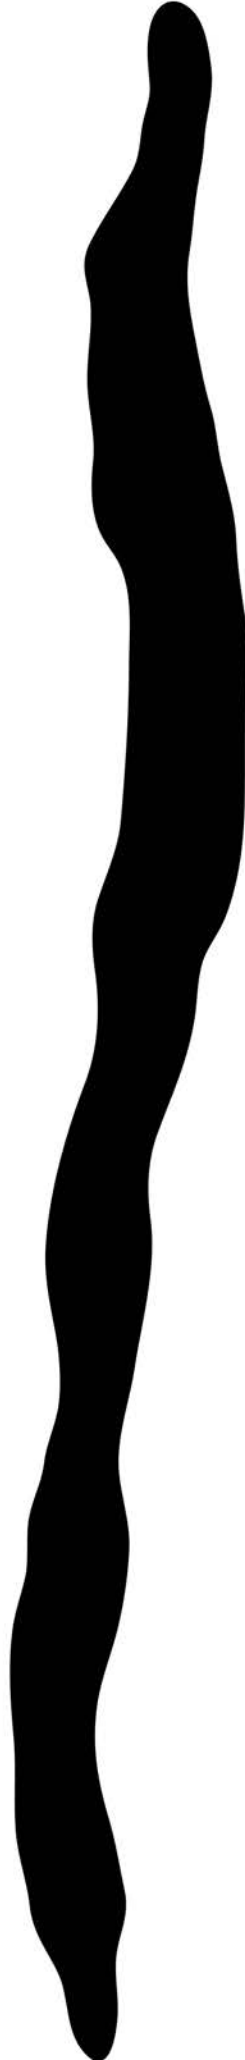

Family: Gotocotyliidae

Species: *Neogotocotyla rohdii* Hadi & Bilqees, 2010

Body Surface: 2,991,506

Clamp Surface: 347,296

Ratio: 11.61

Reference: Hadi, 2010, p. 22

1 mm

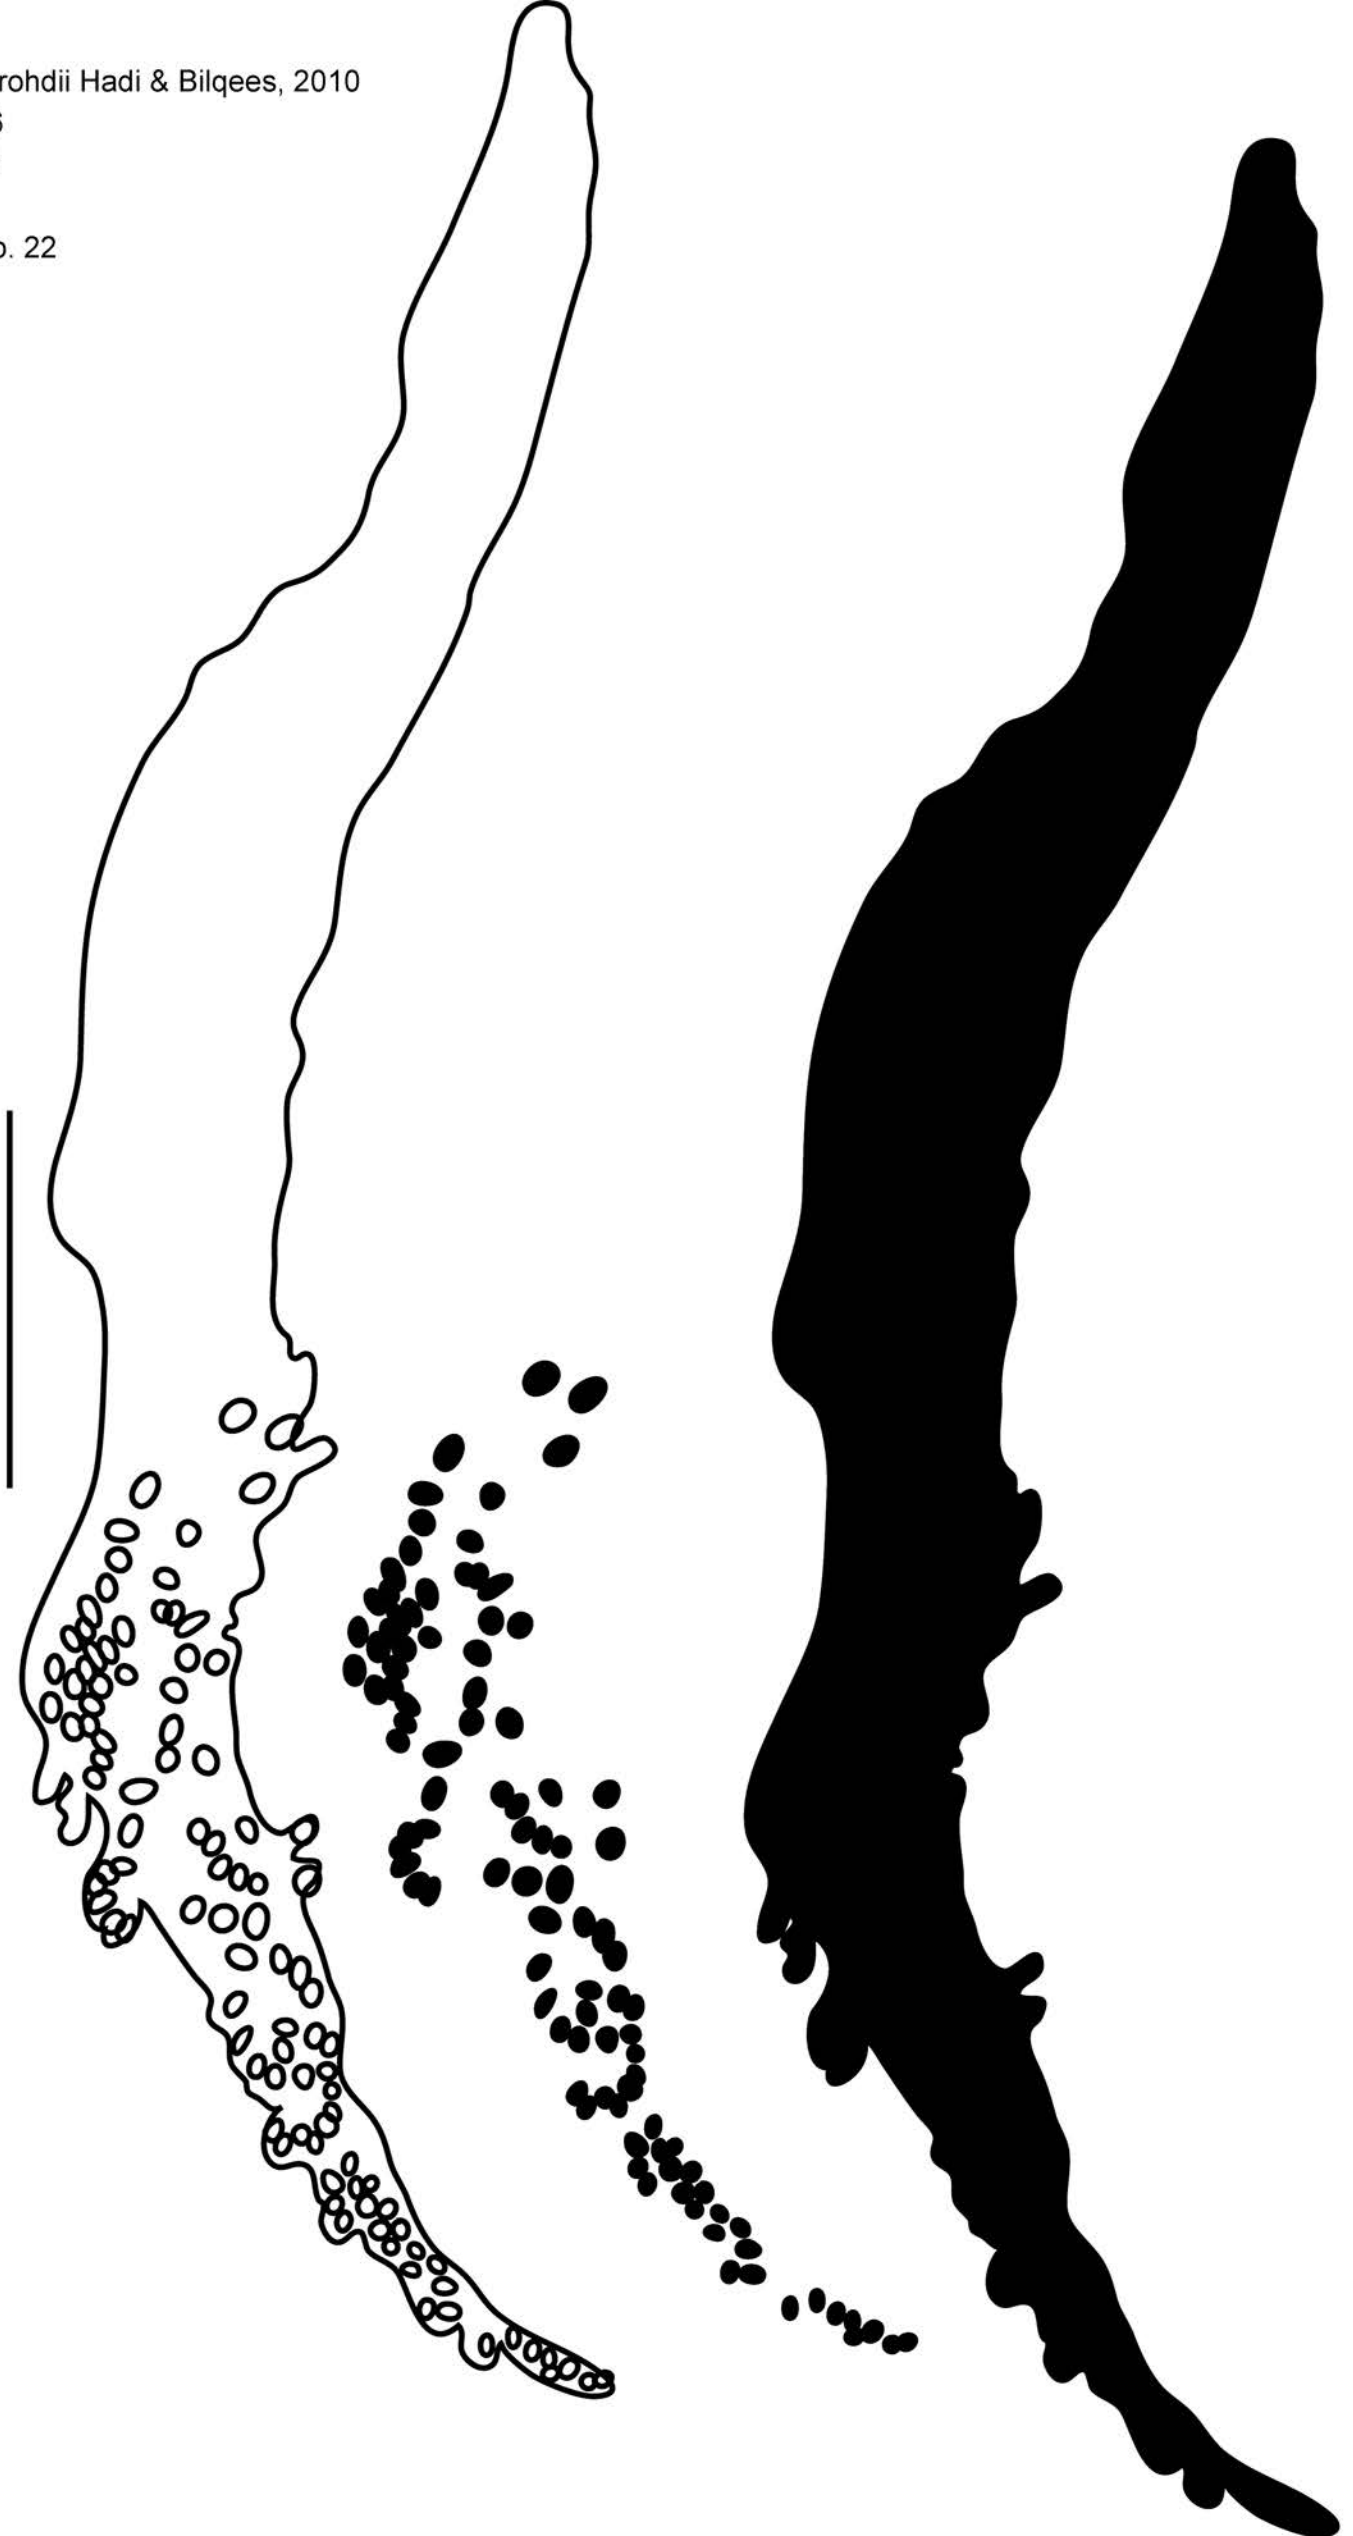

Family: Neothoracocotoylidae

Species: *Mexicotyle mexicana* (Meserve, 1938) Lebedev, 1984

Body Surface: 2,566,693

Clamp Surface: 133,237

Ratio: 5.19

Reference: Lebedev, 1986, p. 90

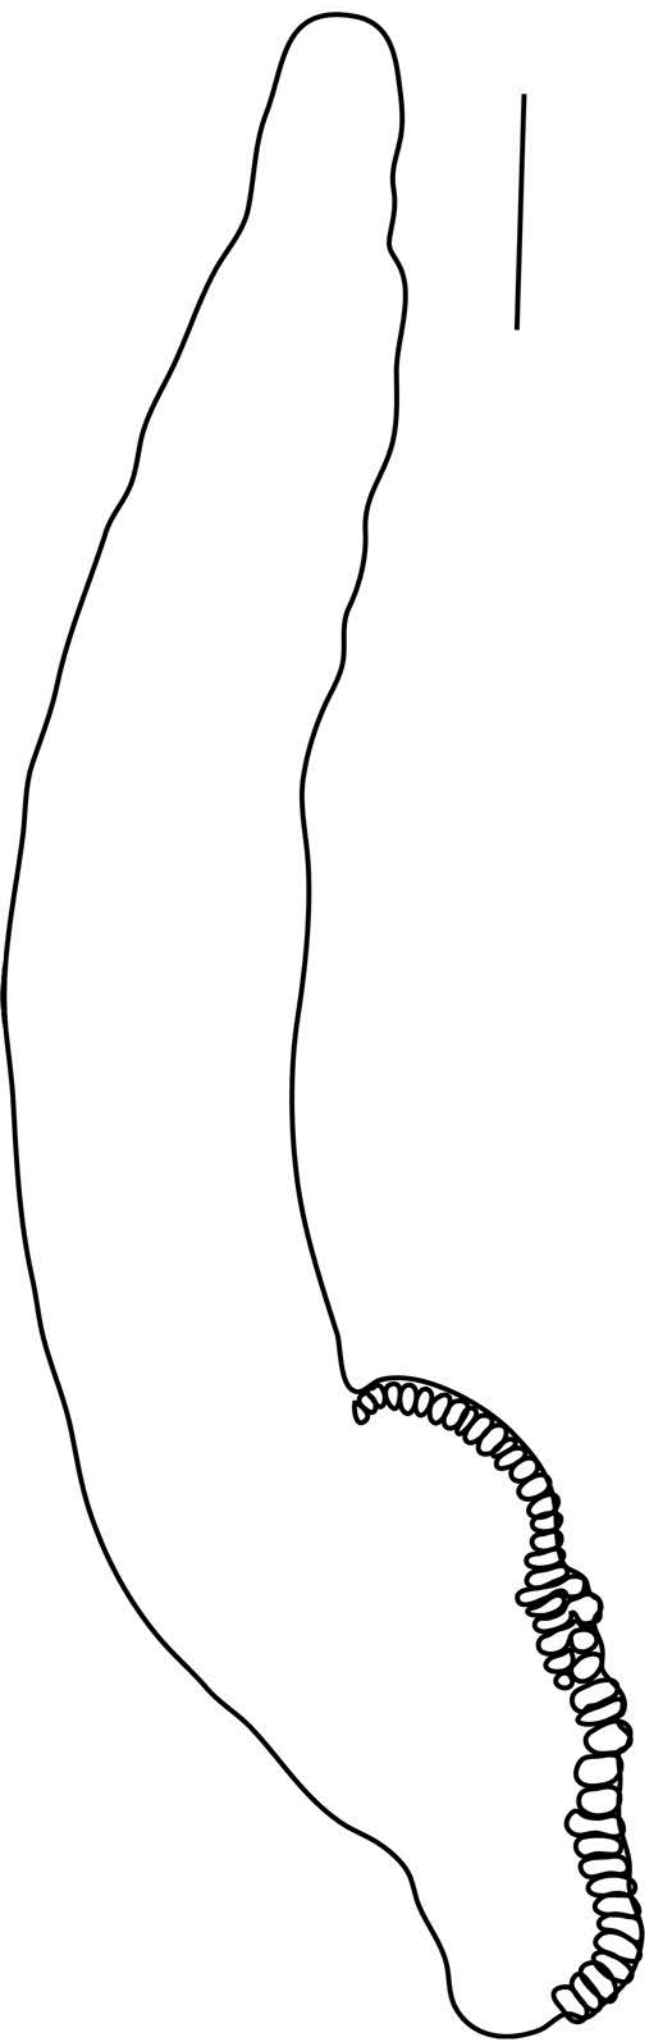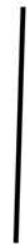

0.5 mm

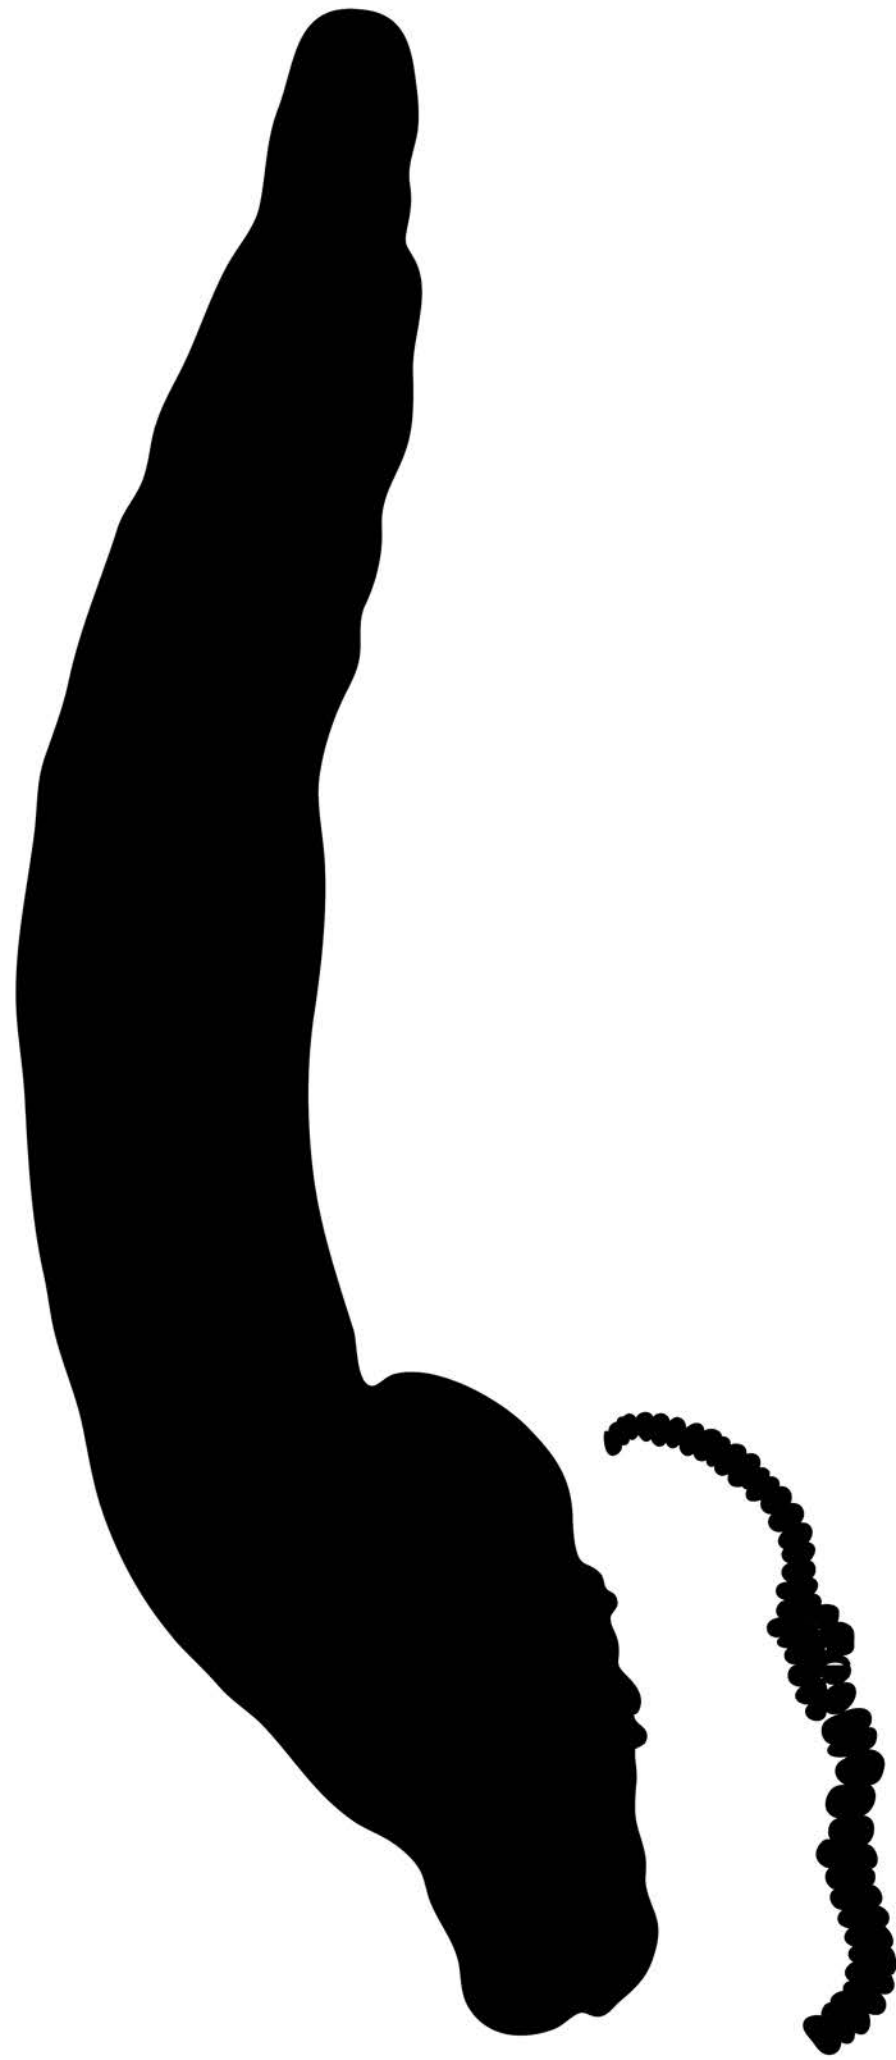

Family: Neothoracocotylidae

Species: *Neothoracocotyle acanthocybii* (Meserve, 1938) Hargis, 1956

Body Surface: 126,796

Clamp Surface: 12,940

Ratio: 10.21

Reference: Lebedev, 1986, p. 88

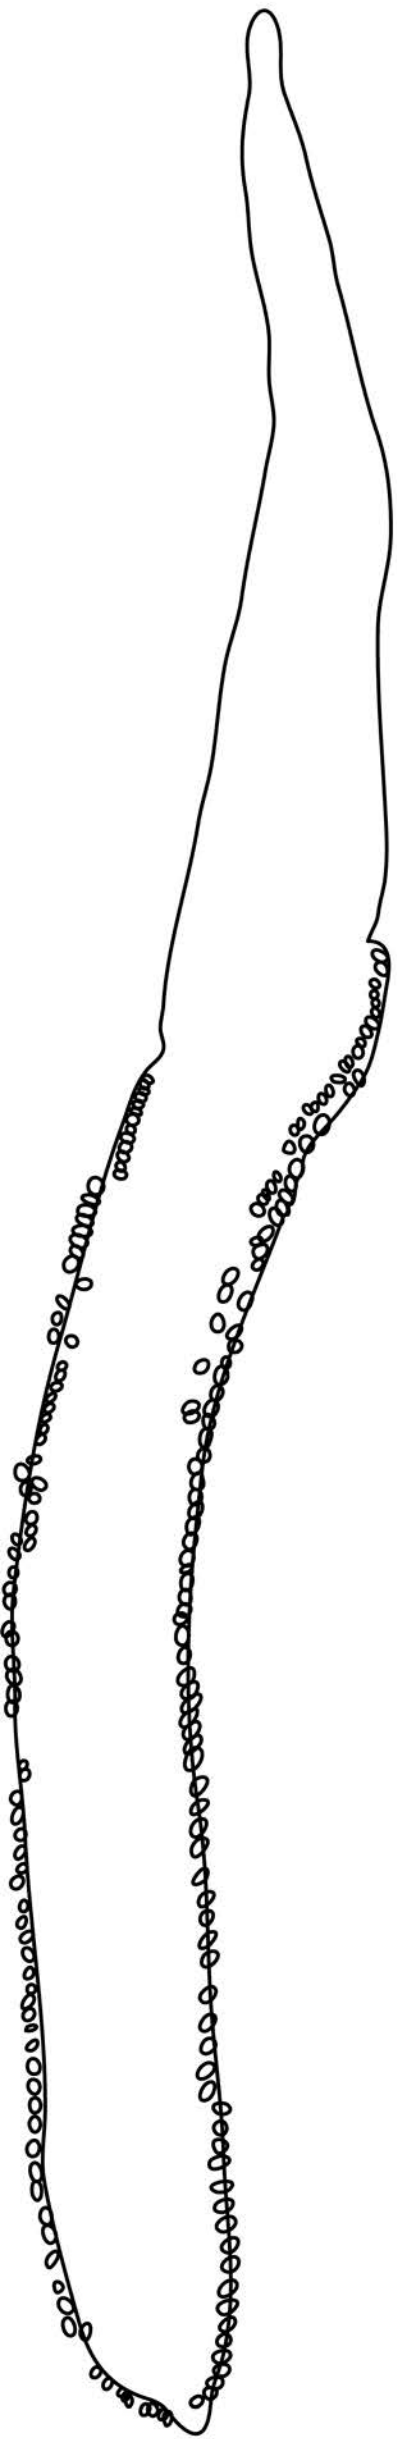

14 mm

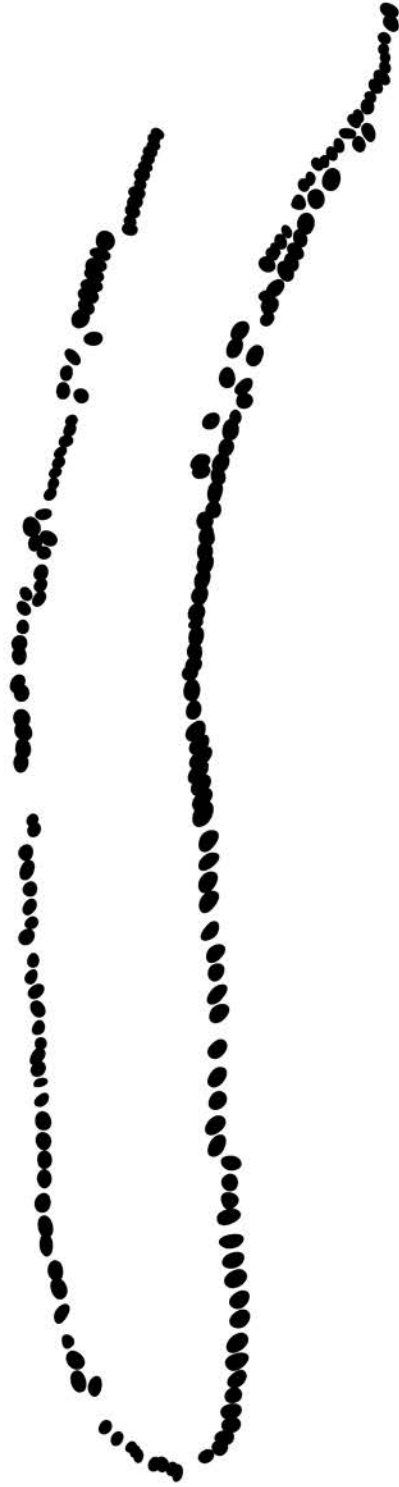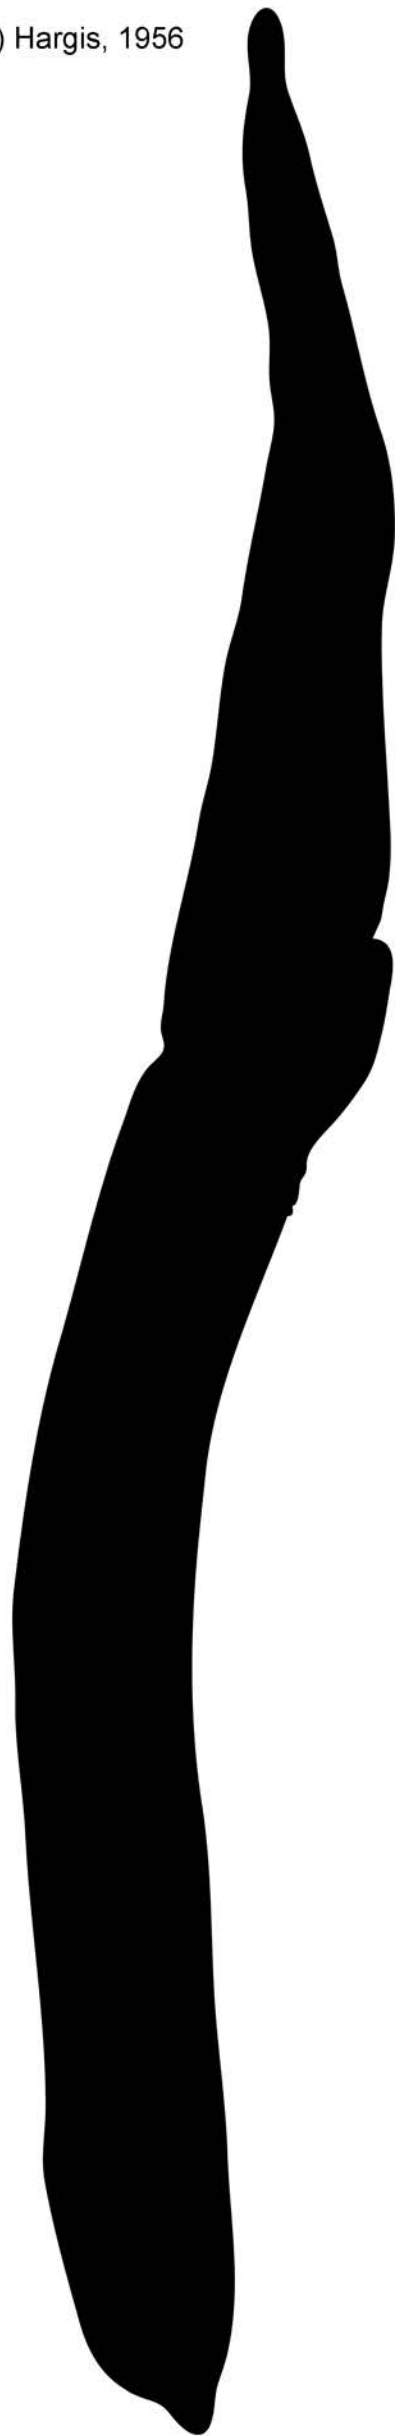

Family: Neothoracocotylidae

Species: *Paradawesia bychowskyi* Bravo & Lamothe, 1976

Body Surface: 3,604,259

Clamp Surface: 390,338

Ratio: 10.83

Reference: Lebedev, 1986, p. 94

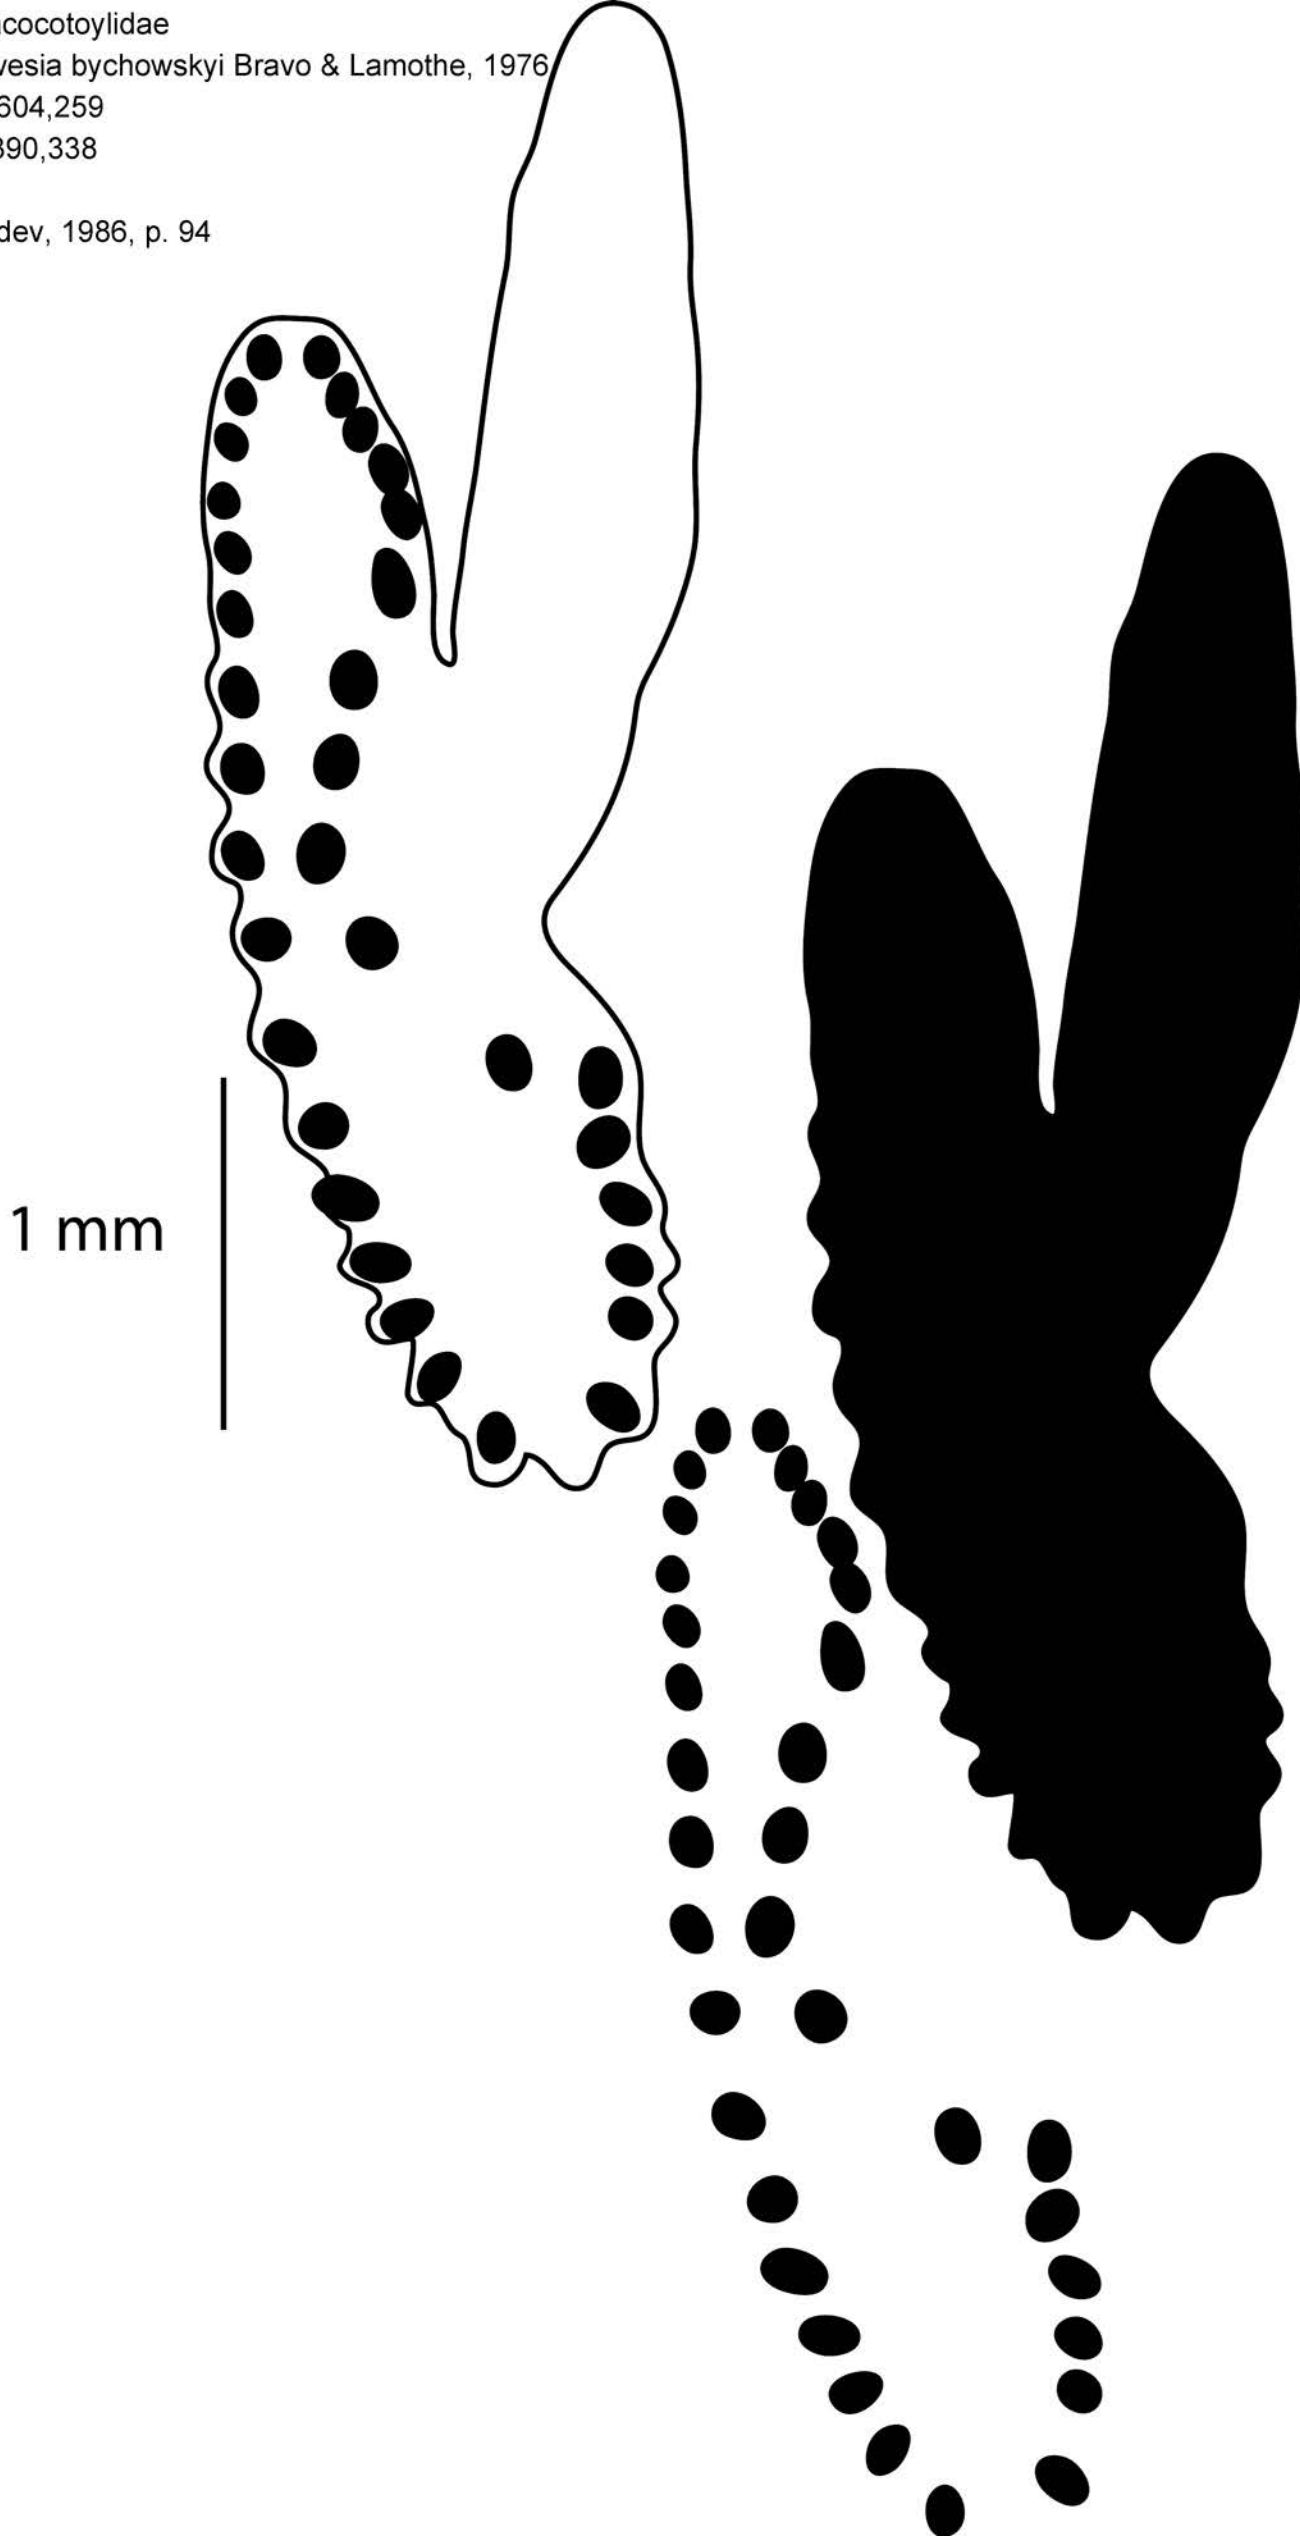

Family: Neothoracocotylidae

Species: *Pricea fotedari* Gupta & Sharma, 1979

Body Surface: 2,219,395

Clamp Surface: 250,628

Ratio: 11.29

Reference: Pandey, 2008, p. 383

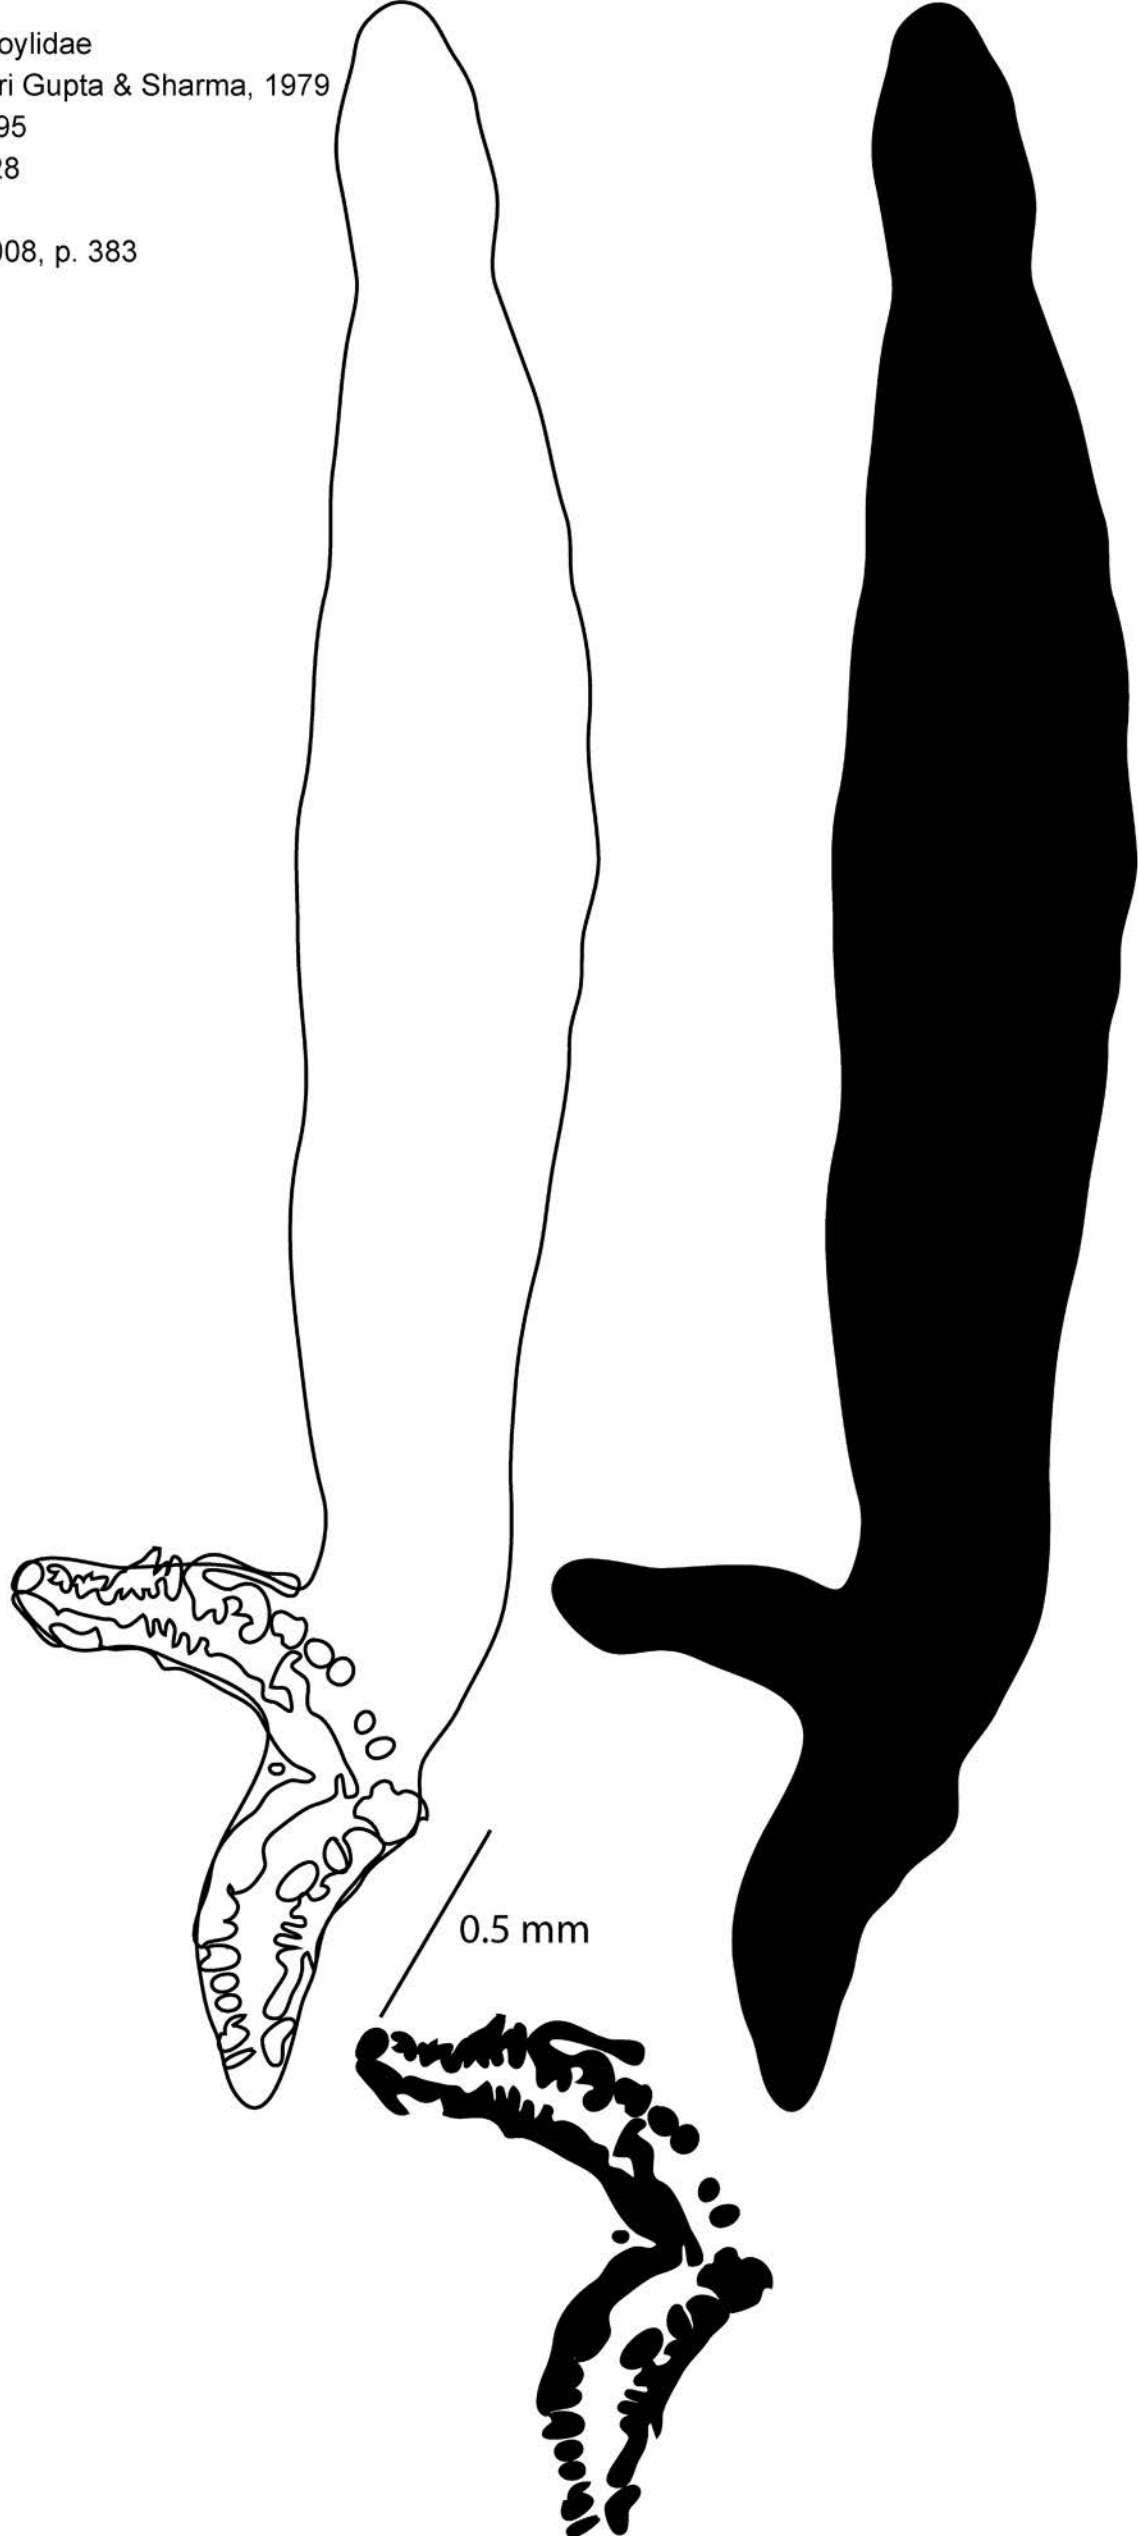

Family: Neothoracocotylidae  
Species: *Picea microcotylae* Chauhan, 1945  
Body Surface: 31,523  
Clamp Surface: 3,995  
Ratio: 12.67  
Reference: Chauhan, 1945, p. 148

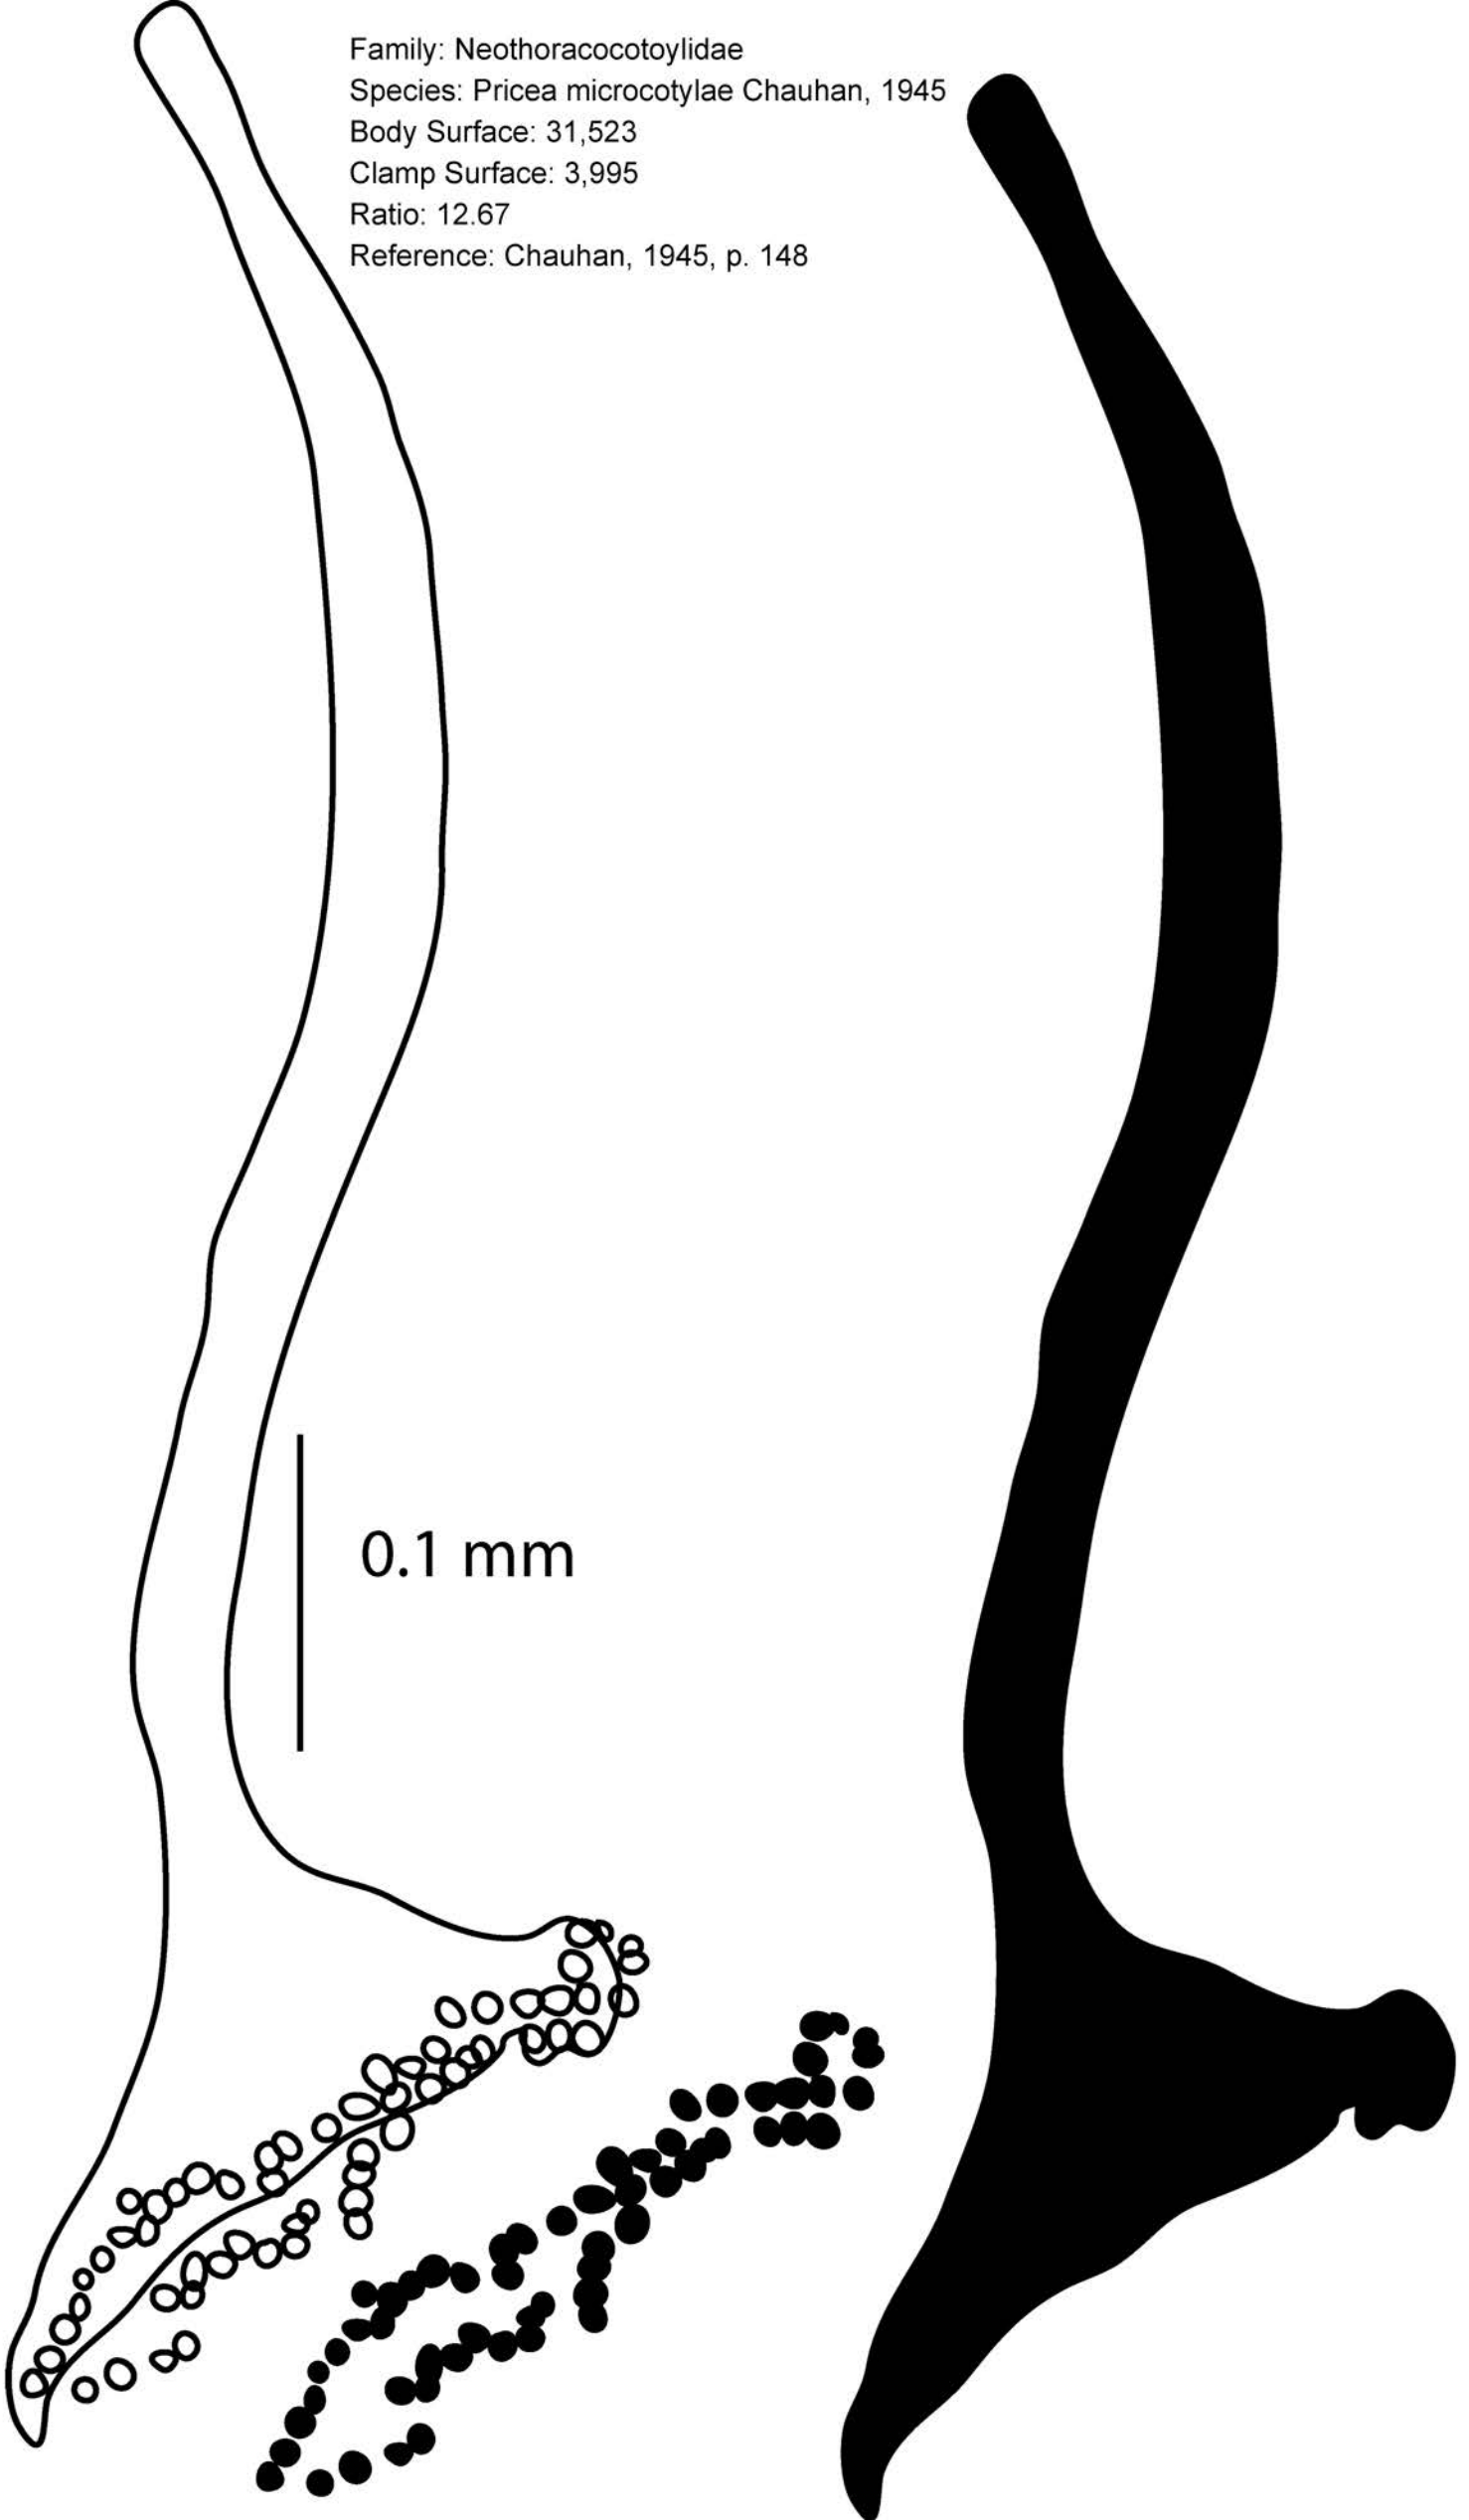



Family: Neothoracocotylidae  
Species: *Pricea minima* Chauhan, 1945  
Body Surface: 796,183  
Clamp Surface: 170,955  
Ratio: 21.47  
Reference: Chauhan, 1945, p. 146

0.1 mm |

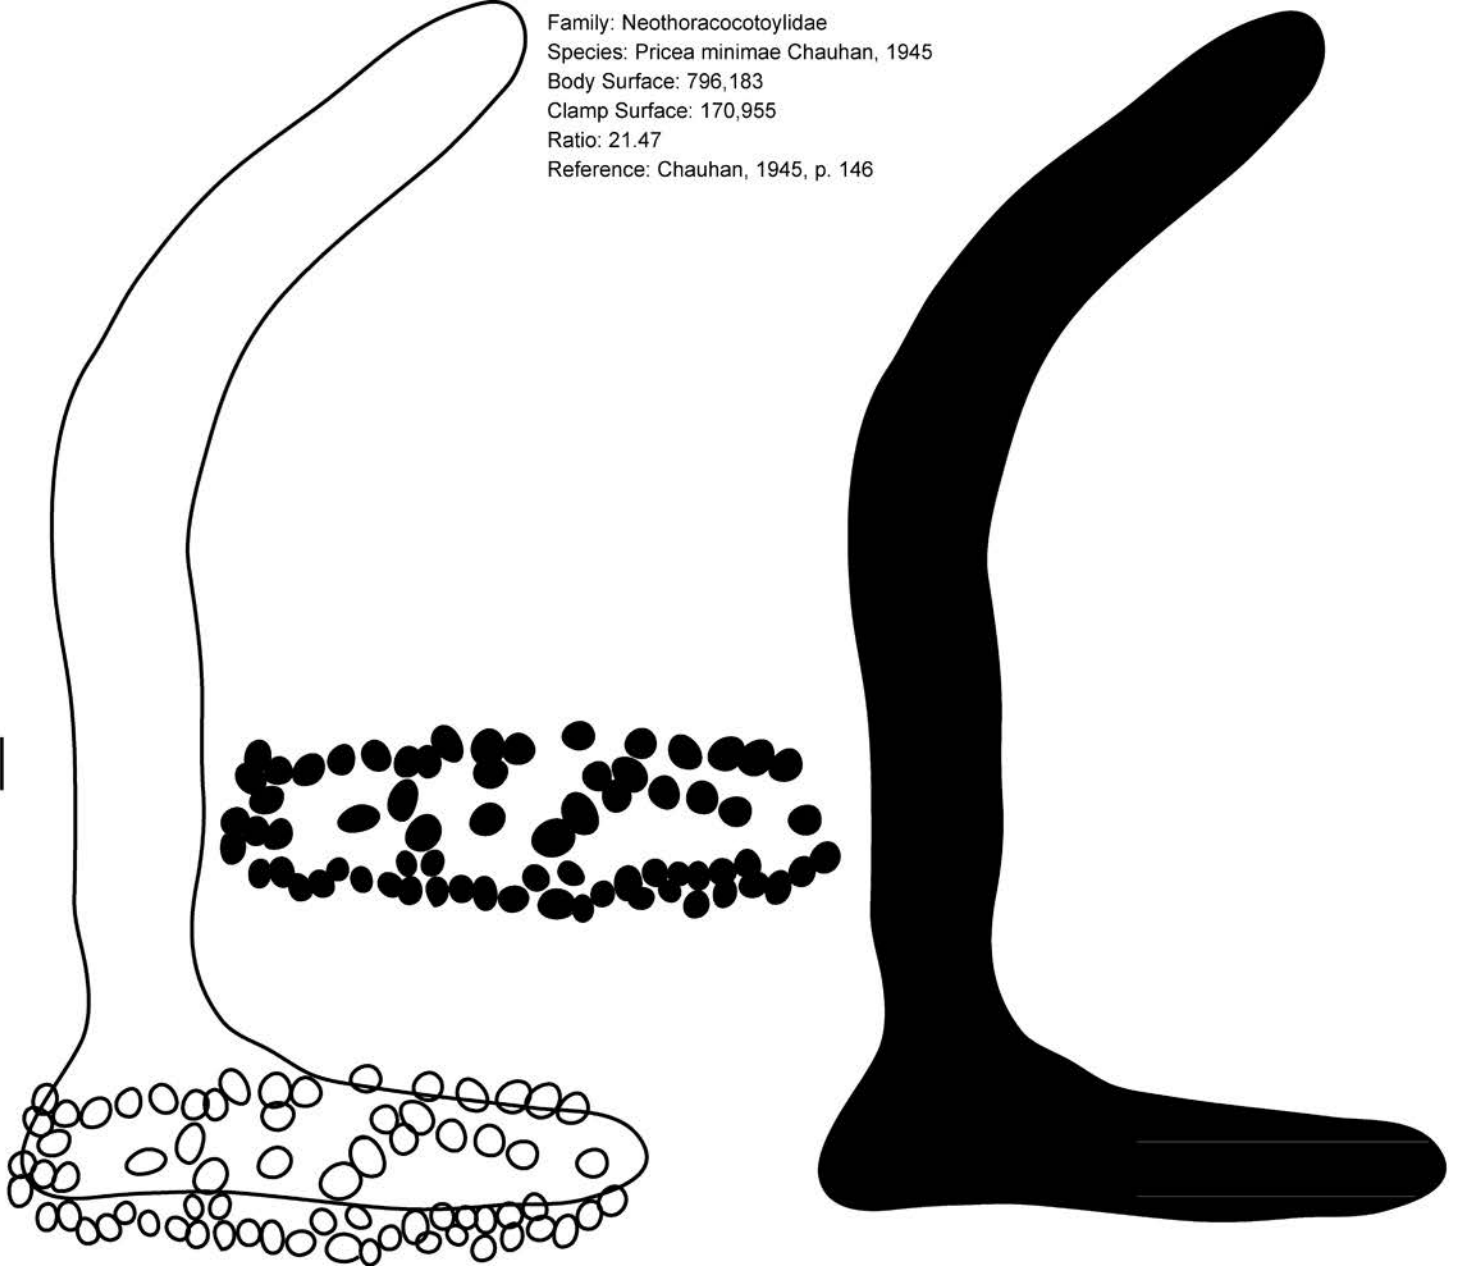

Family: Neothoracocotylidae  
Species: Pricea multae Chauhan, 1945  
Body Surface: 3,561,945  
clamp Surface: 371,996  
Ratio: 10.44  
Reference: Rohde, 1999, p. 173

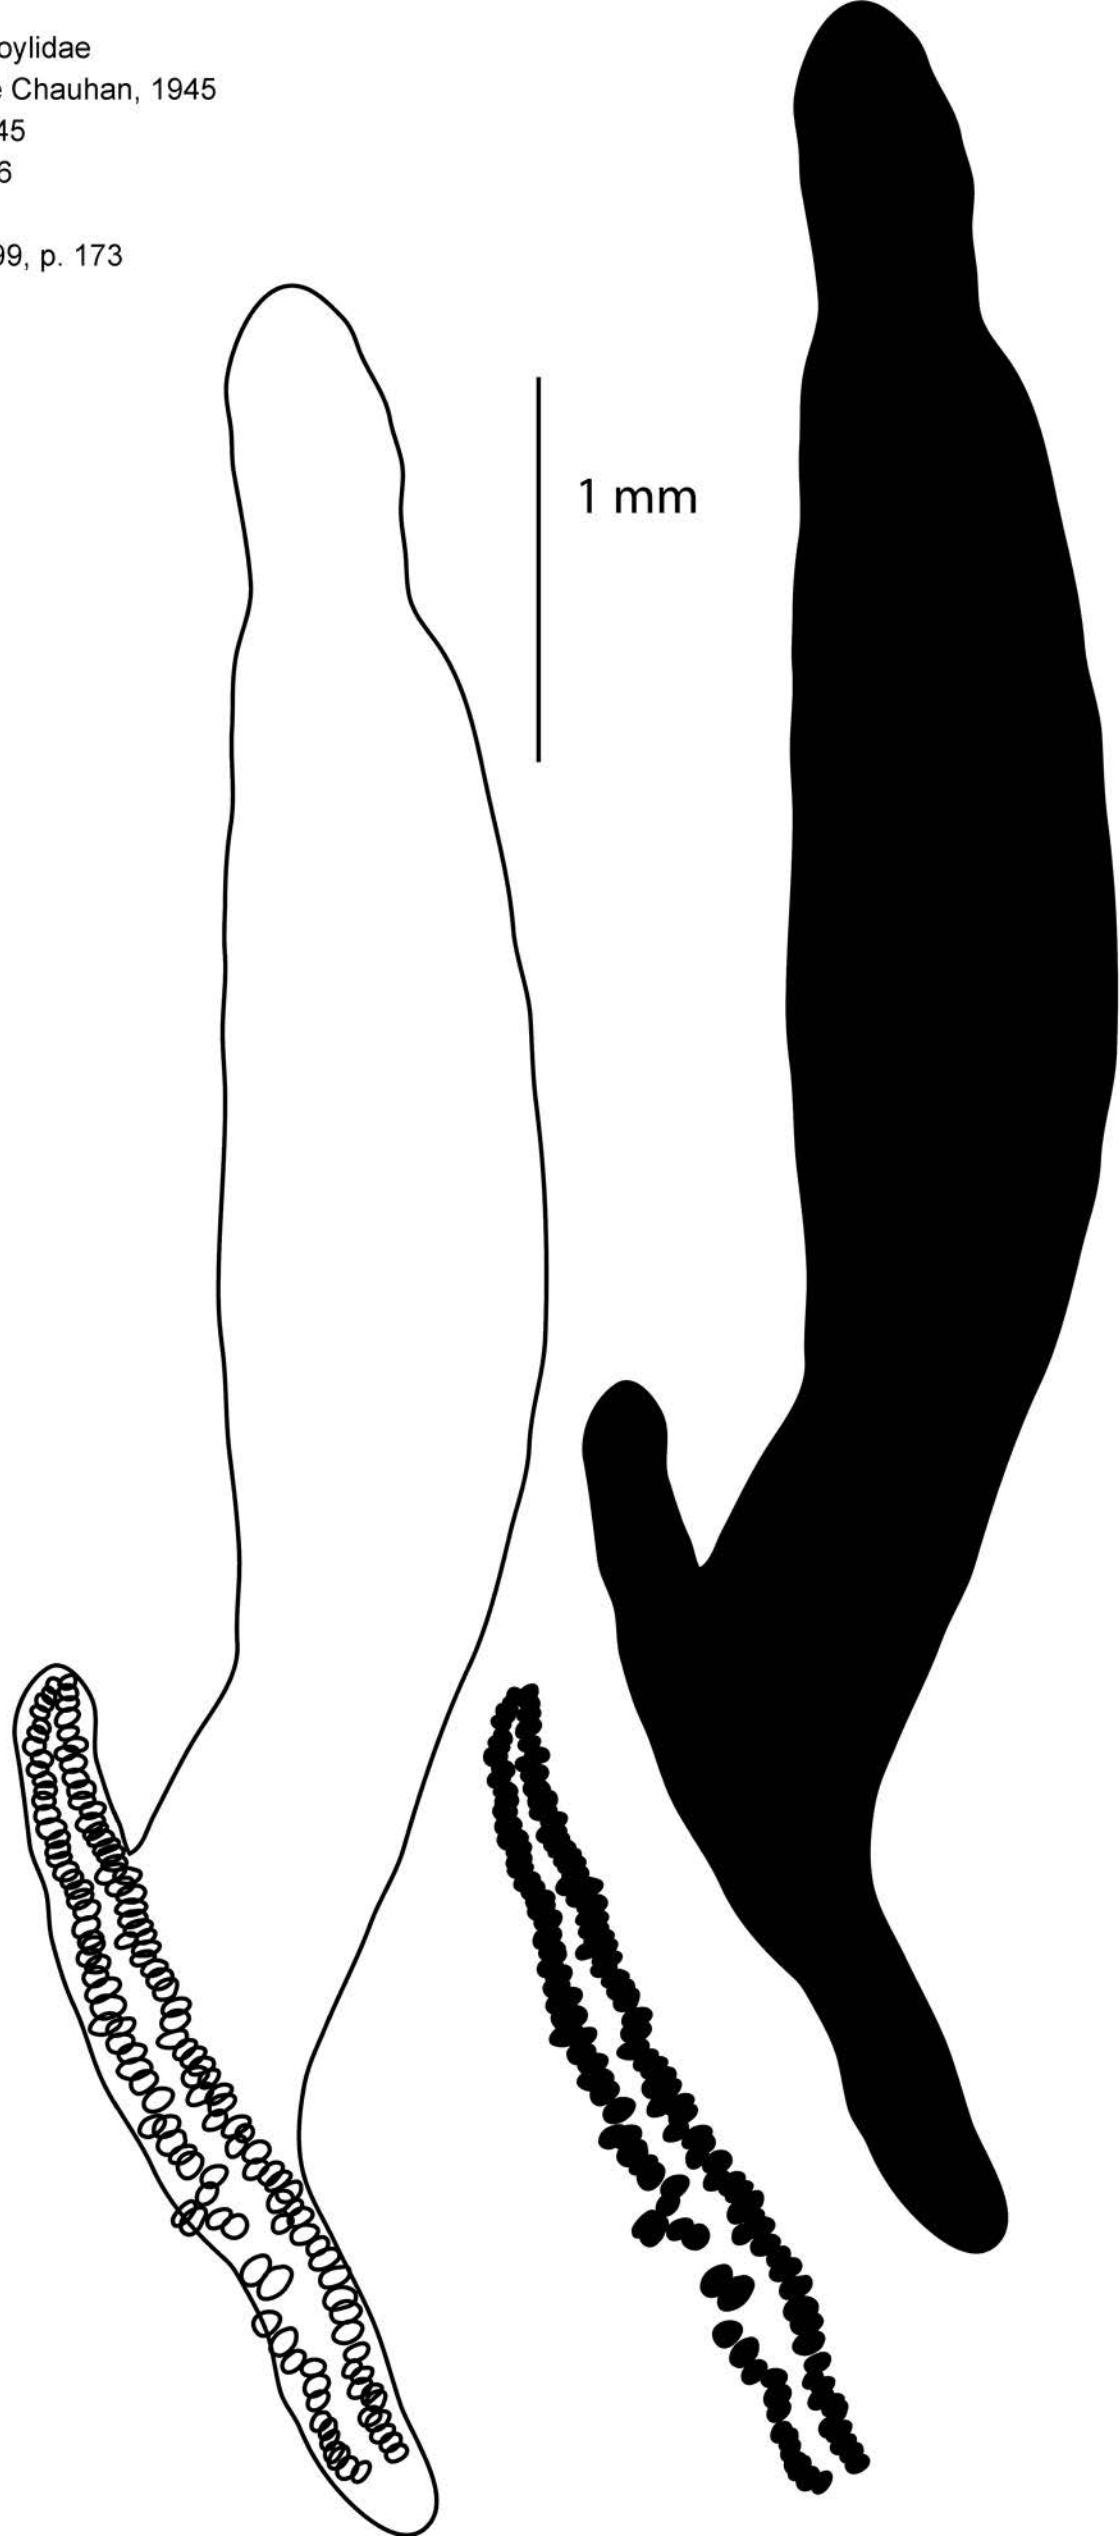

Family: Neothoracocotoylidae  
Species: Pricea solandri Gupta & Channa, 1977  
Body Surface: 29,180  
Clamp Surface: 4,158  
Ratio: 14.25  
Reference: Pandey, 2008, p. 382

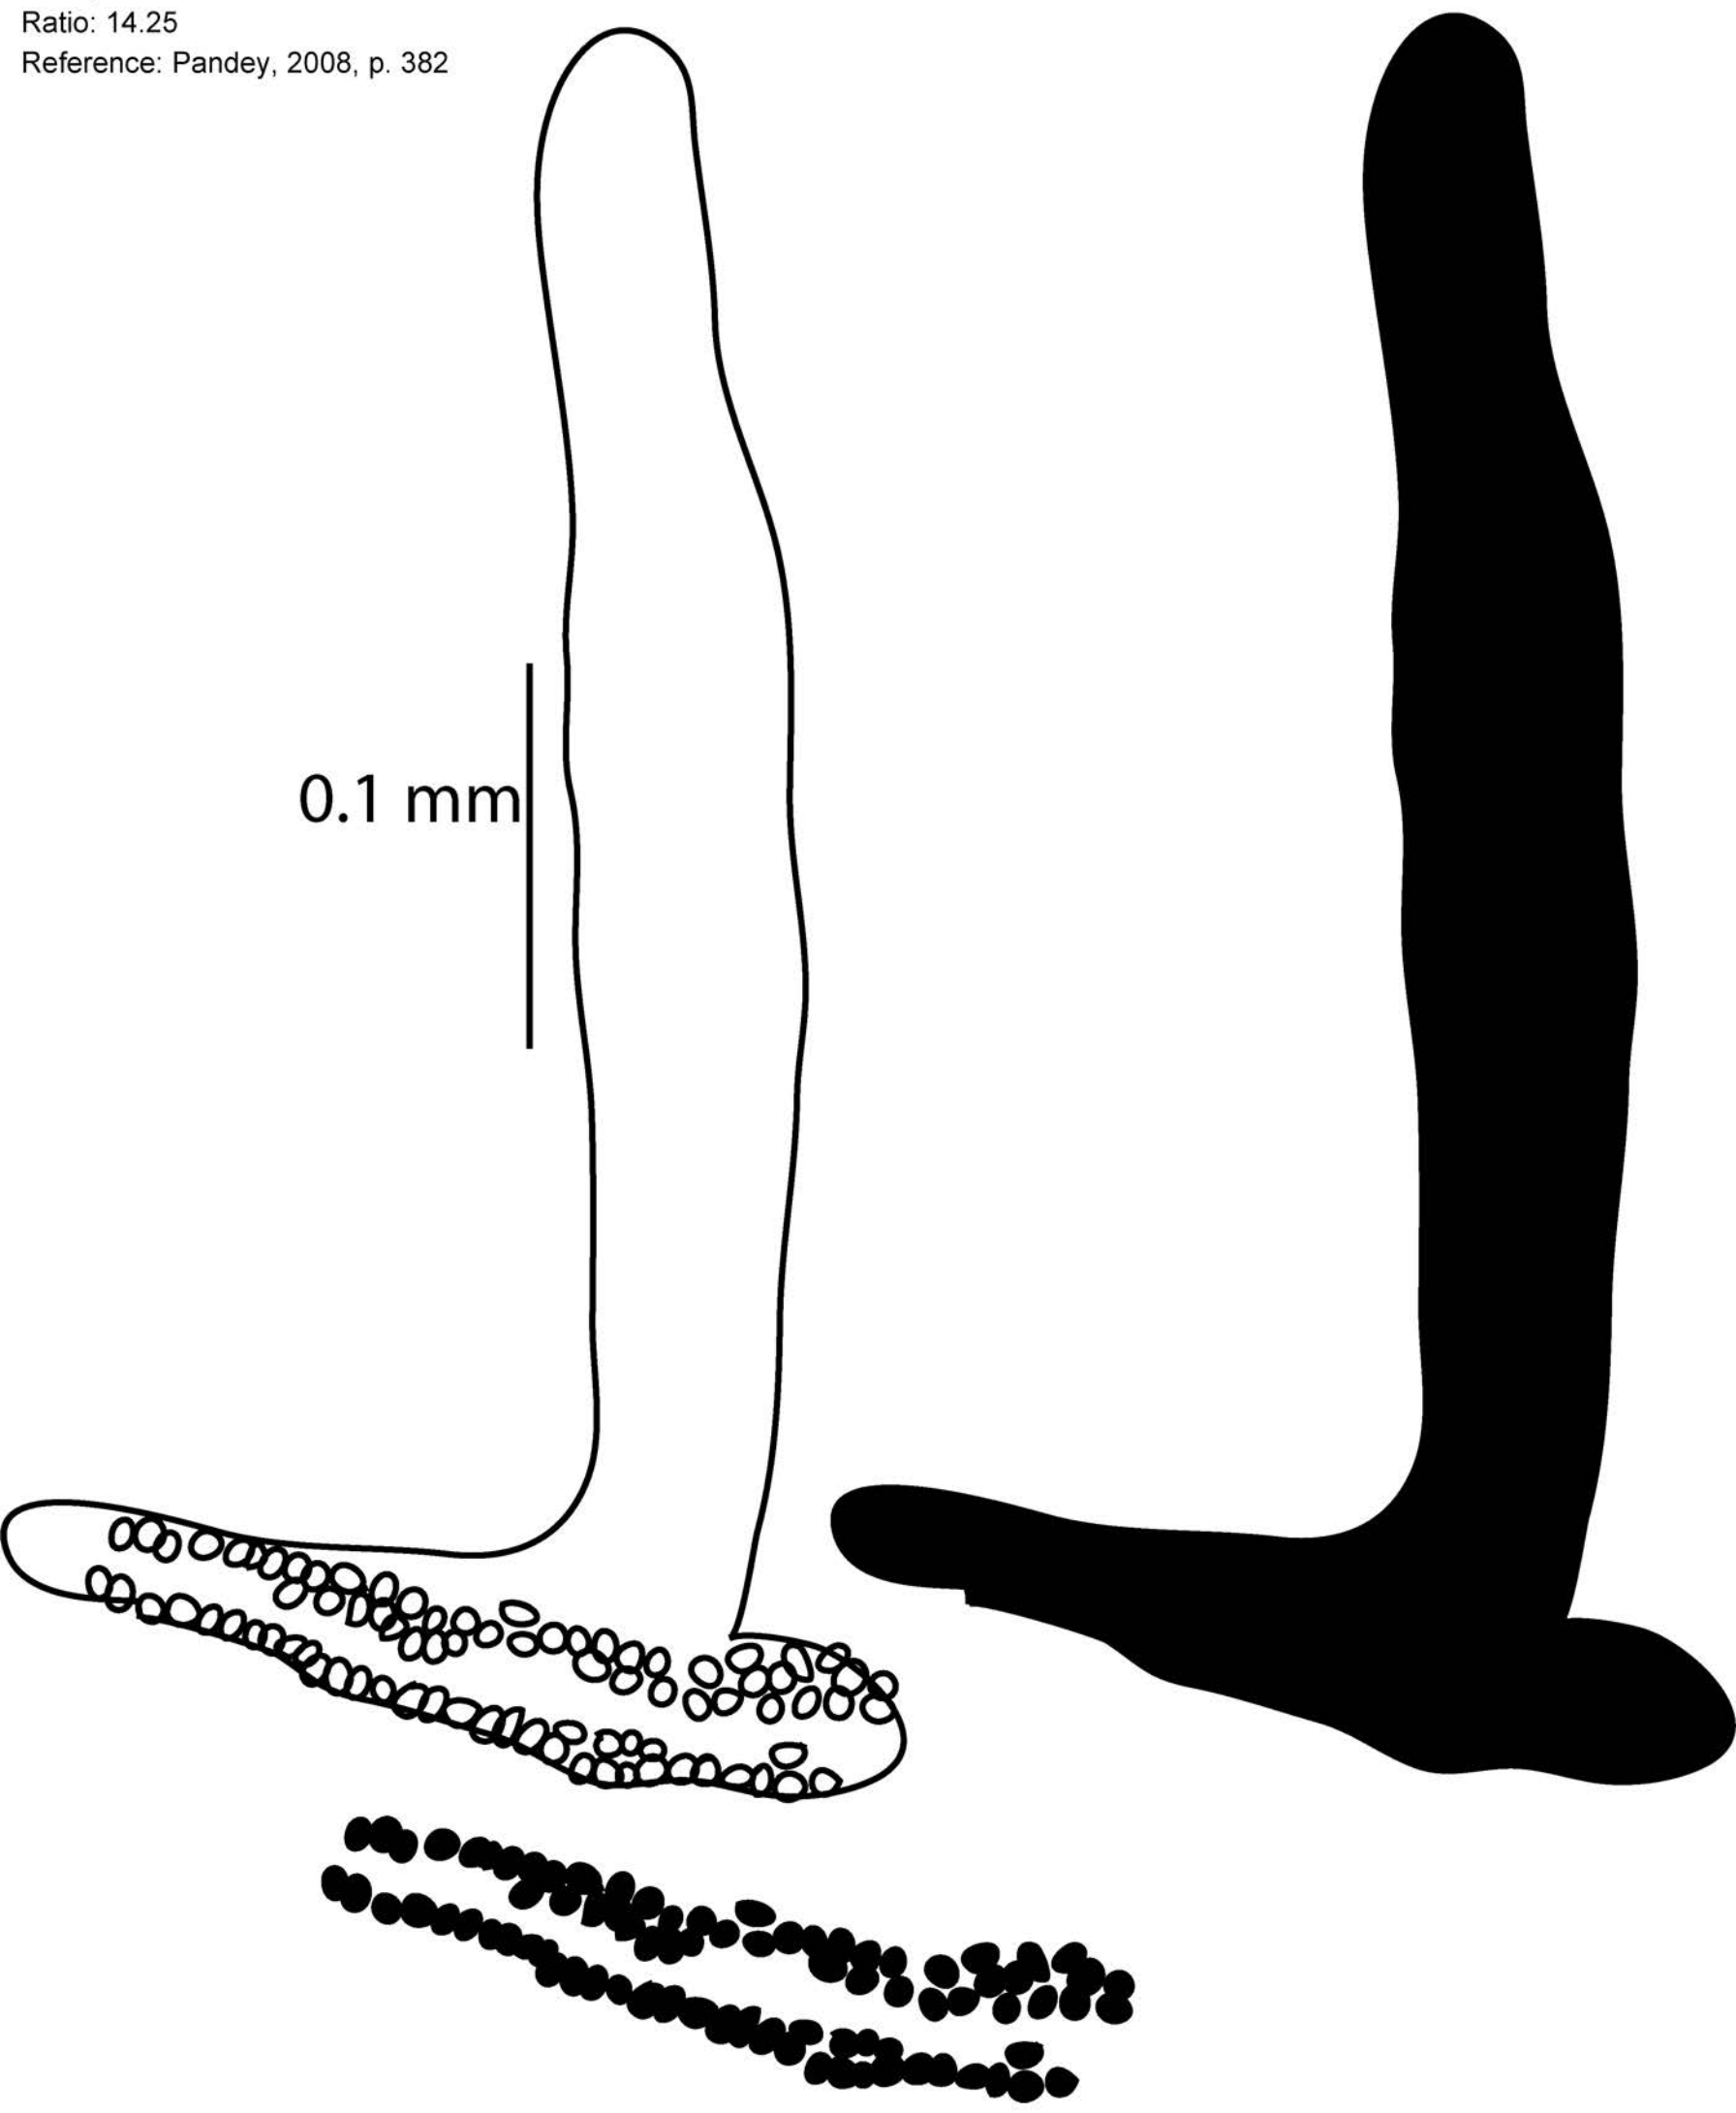

Family: Neothoracocotylidae

Species: *Pseudothoracocotyla ovalis*

(Tripathi, 1956) Yamaguti, 1963

Body Surface: 1,104,406

Clamp Surface: 122,155

Ratio: 11.06

Reference: Hayward, 1999, p. 164

0.4 mm

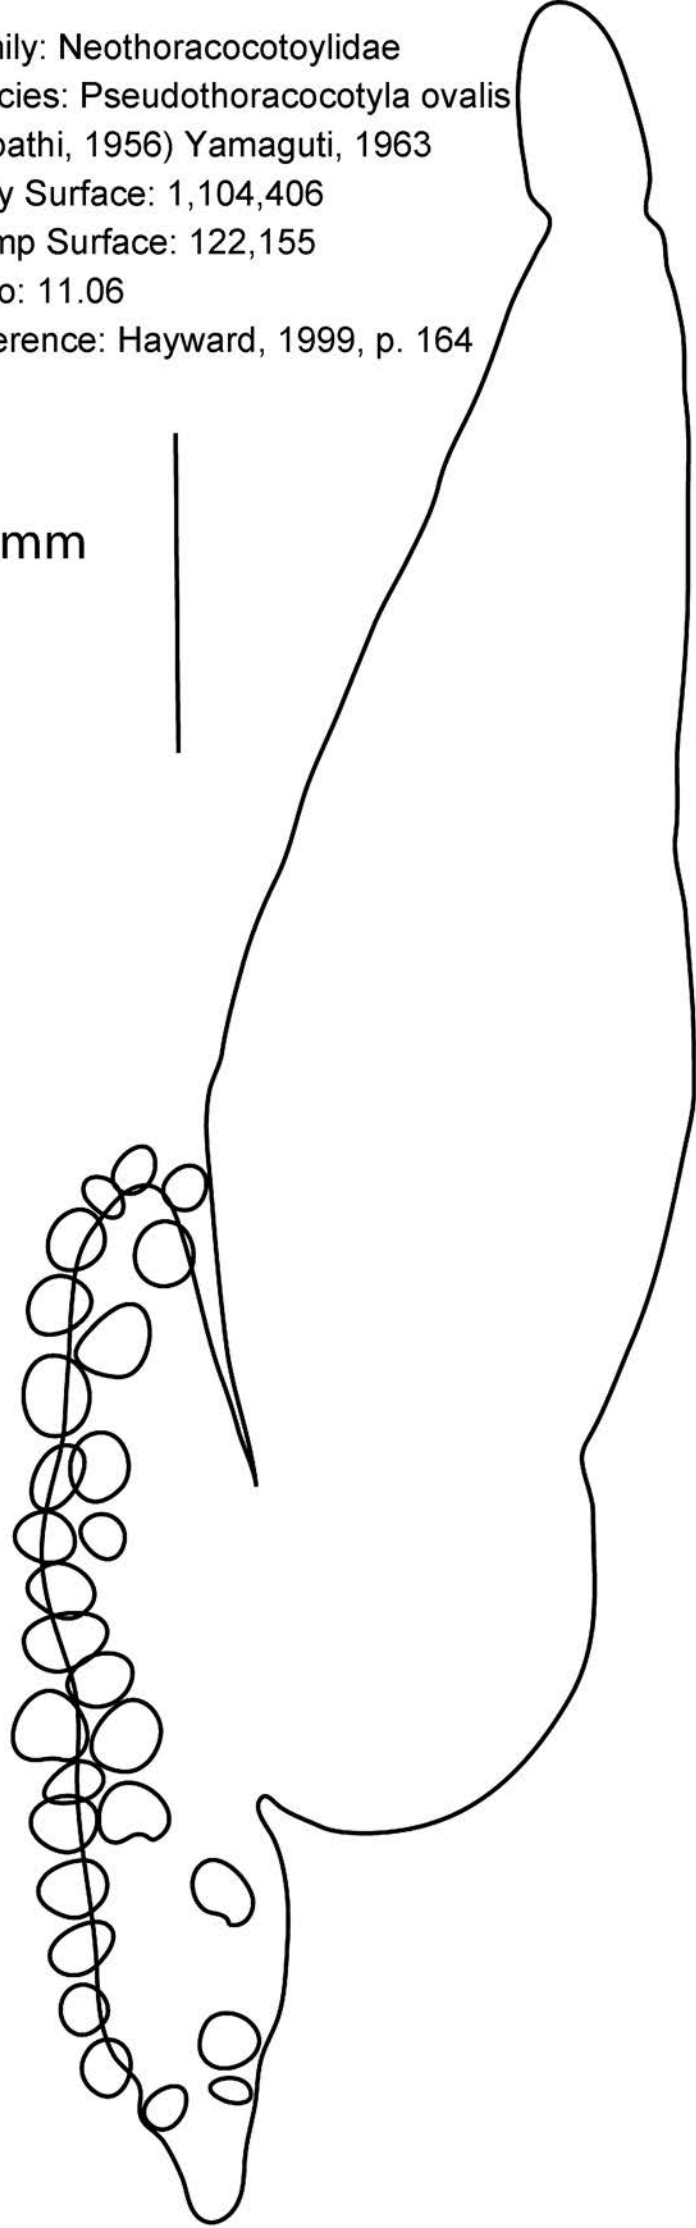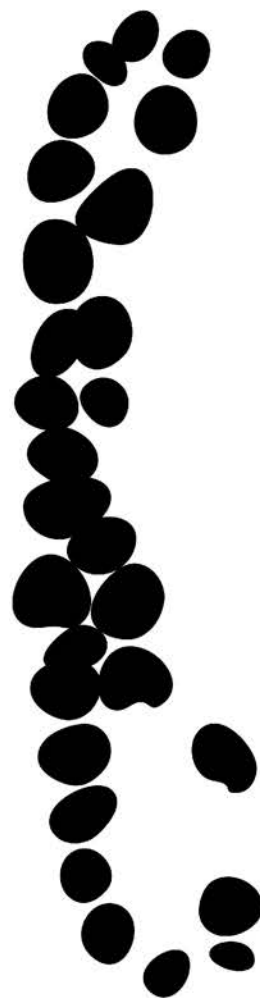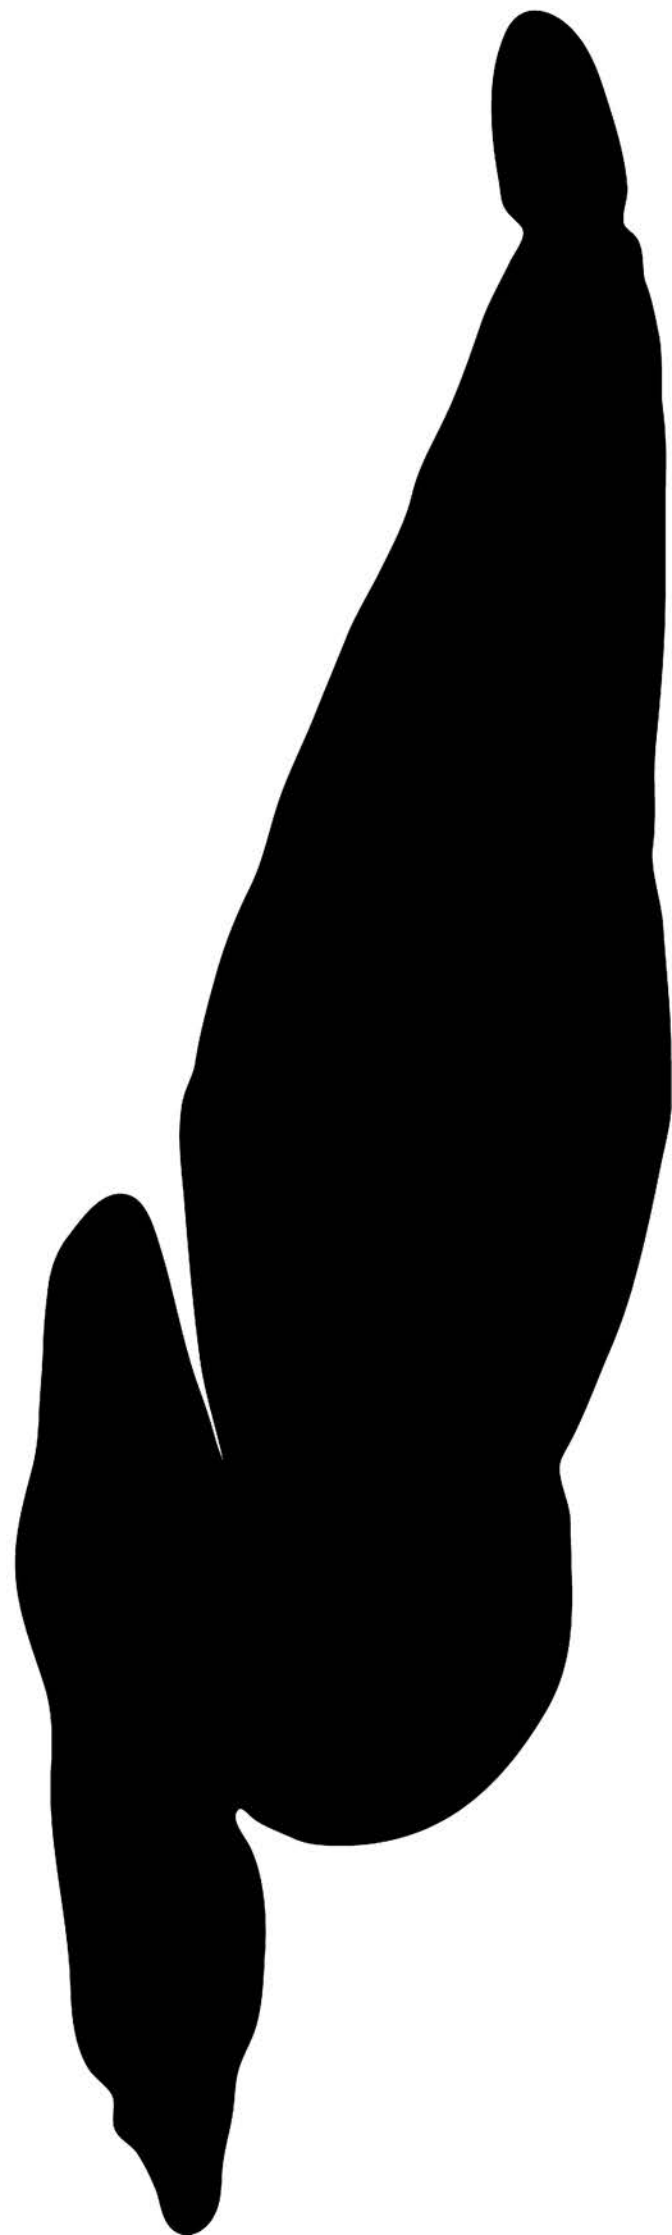

Family: Neothoracocotylidae

Species: *Pseudothoracocotyla whittingtoni* Hayward & Rohde, 1999

Body Surface: 6,151,442

Clamp Surface: 2,086,478

Ratio: 33.92

Reference: Hayward, 1999, p. 167

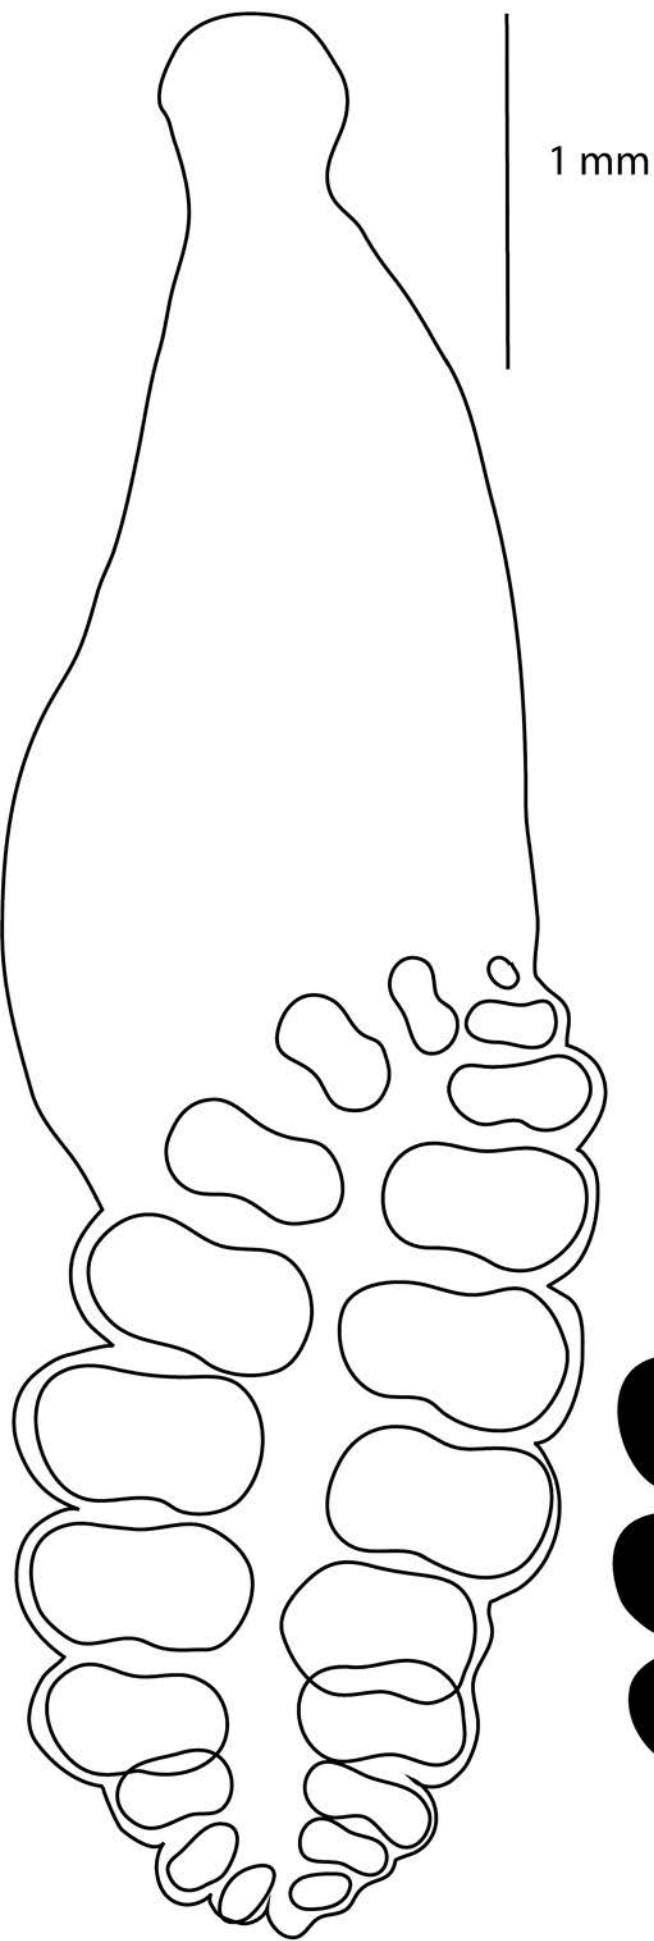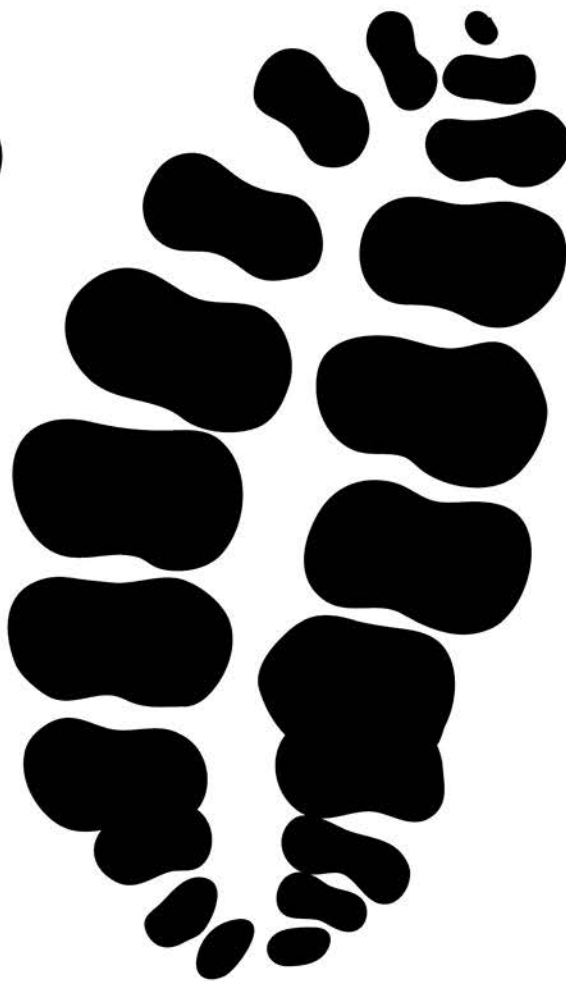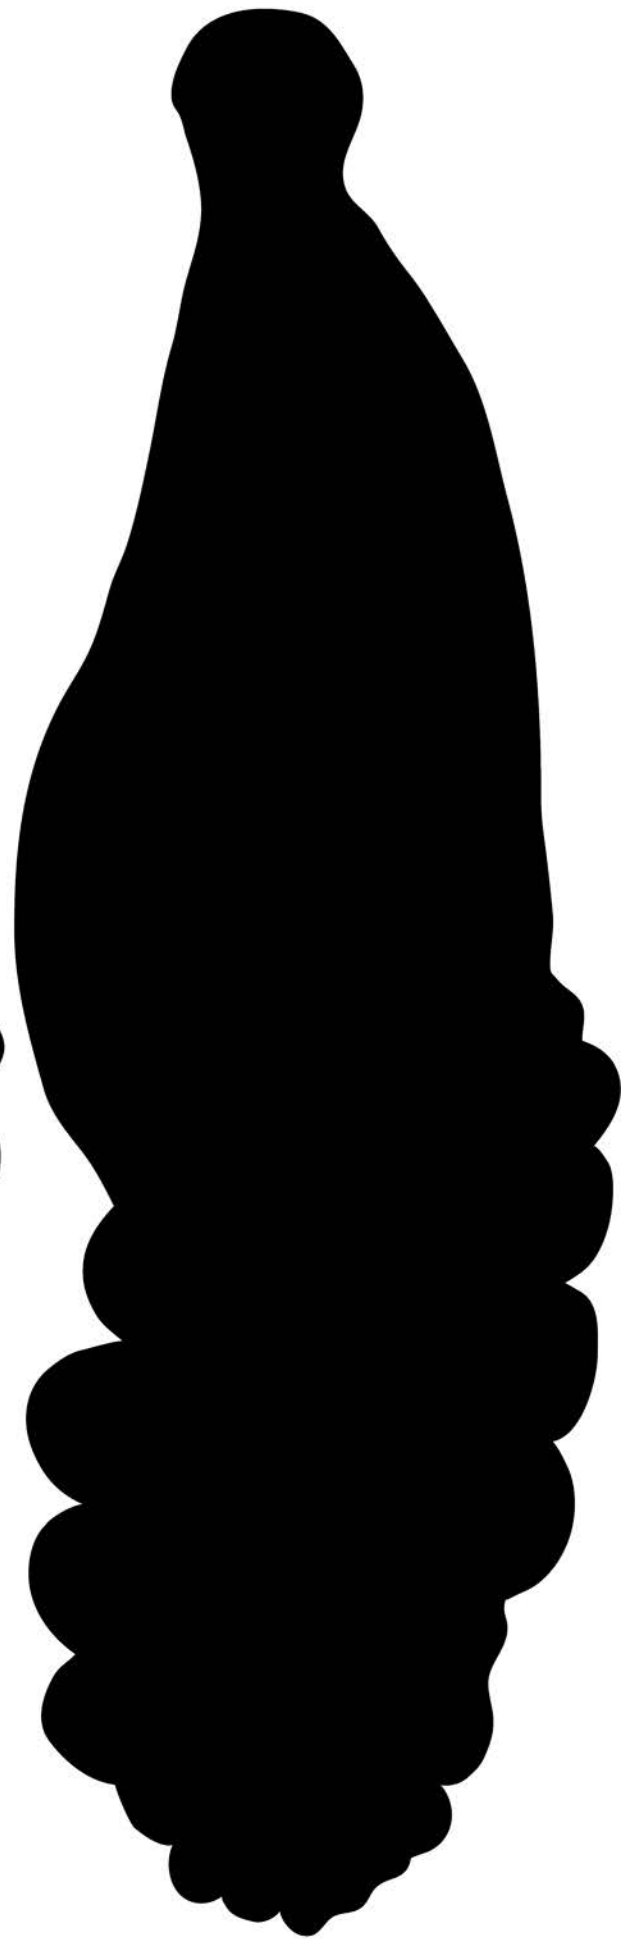

Family: Neothoracocotoylidae

Species: *Scomberocotyle scomberomori* (Koratha, 1955) Hargis, 1956

Body surface: 2837224

Clamp surface: 293771

Ratio: 10,35

Reference: Lebedev, 1986, p 89

6 mm

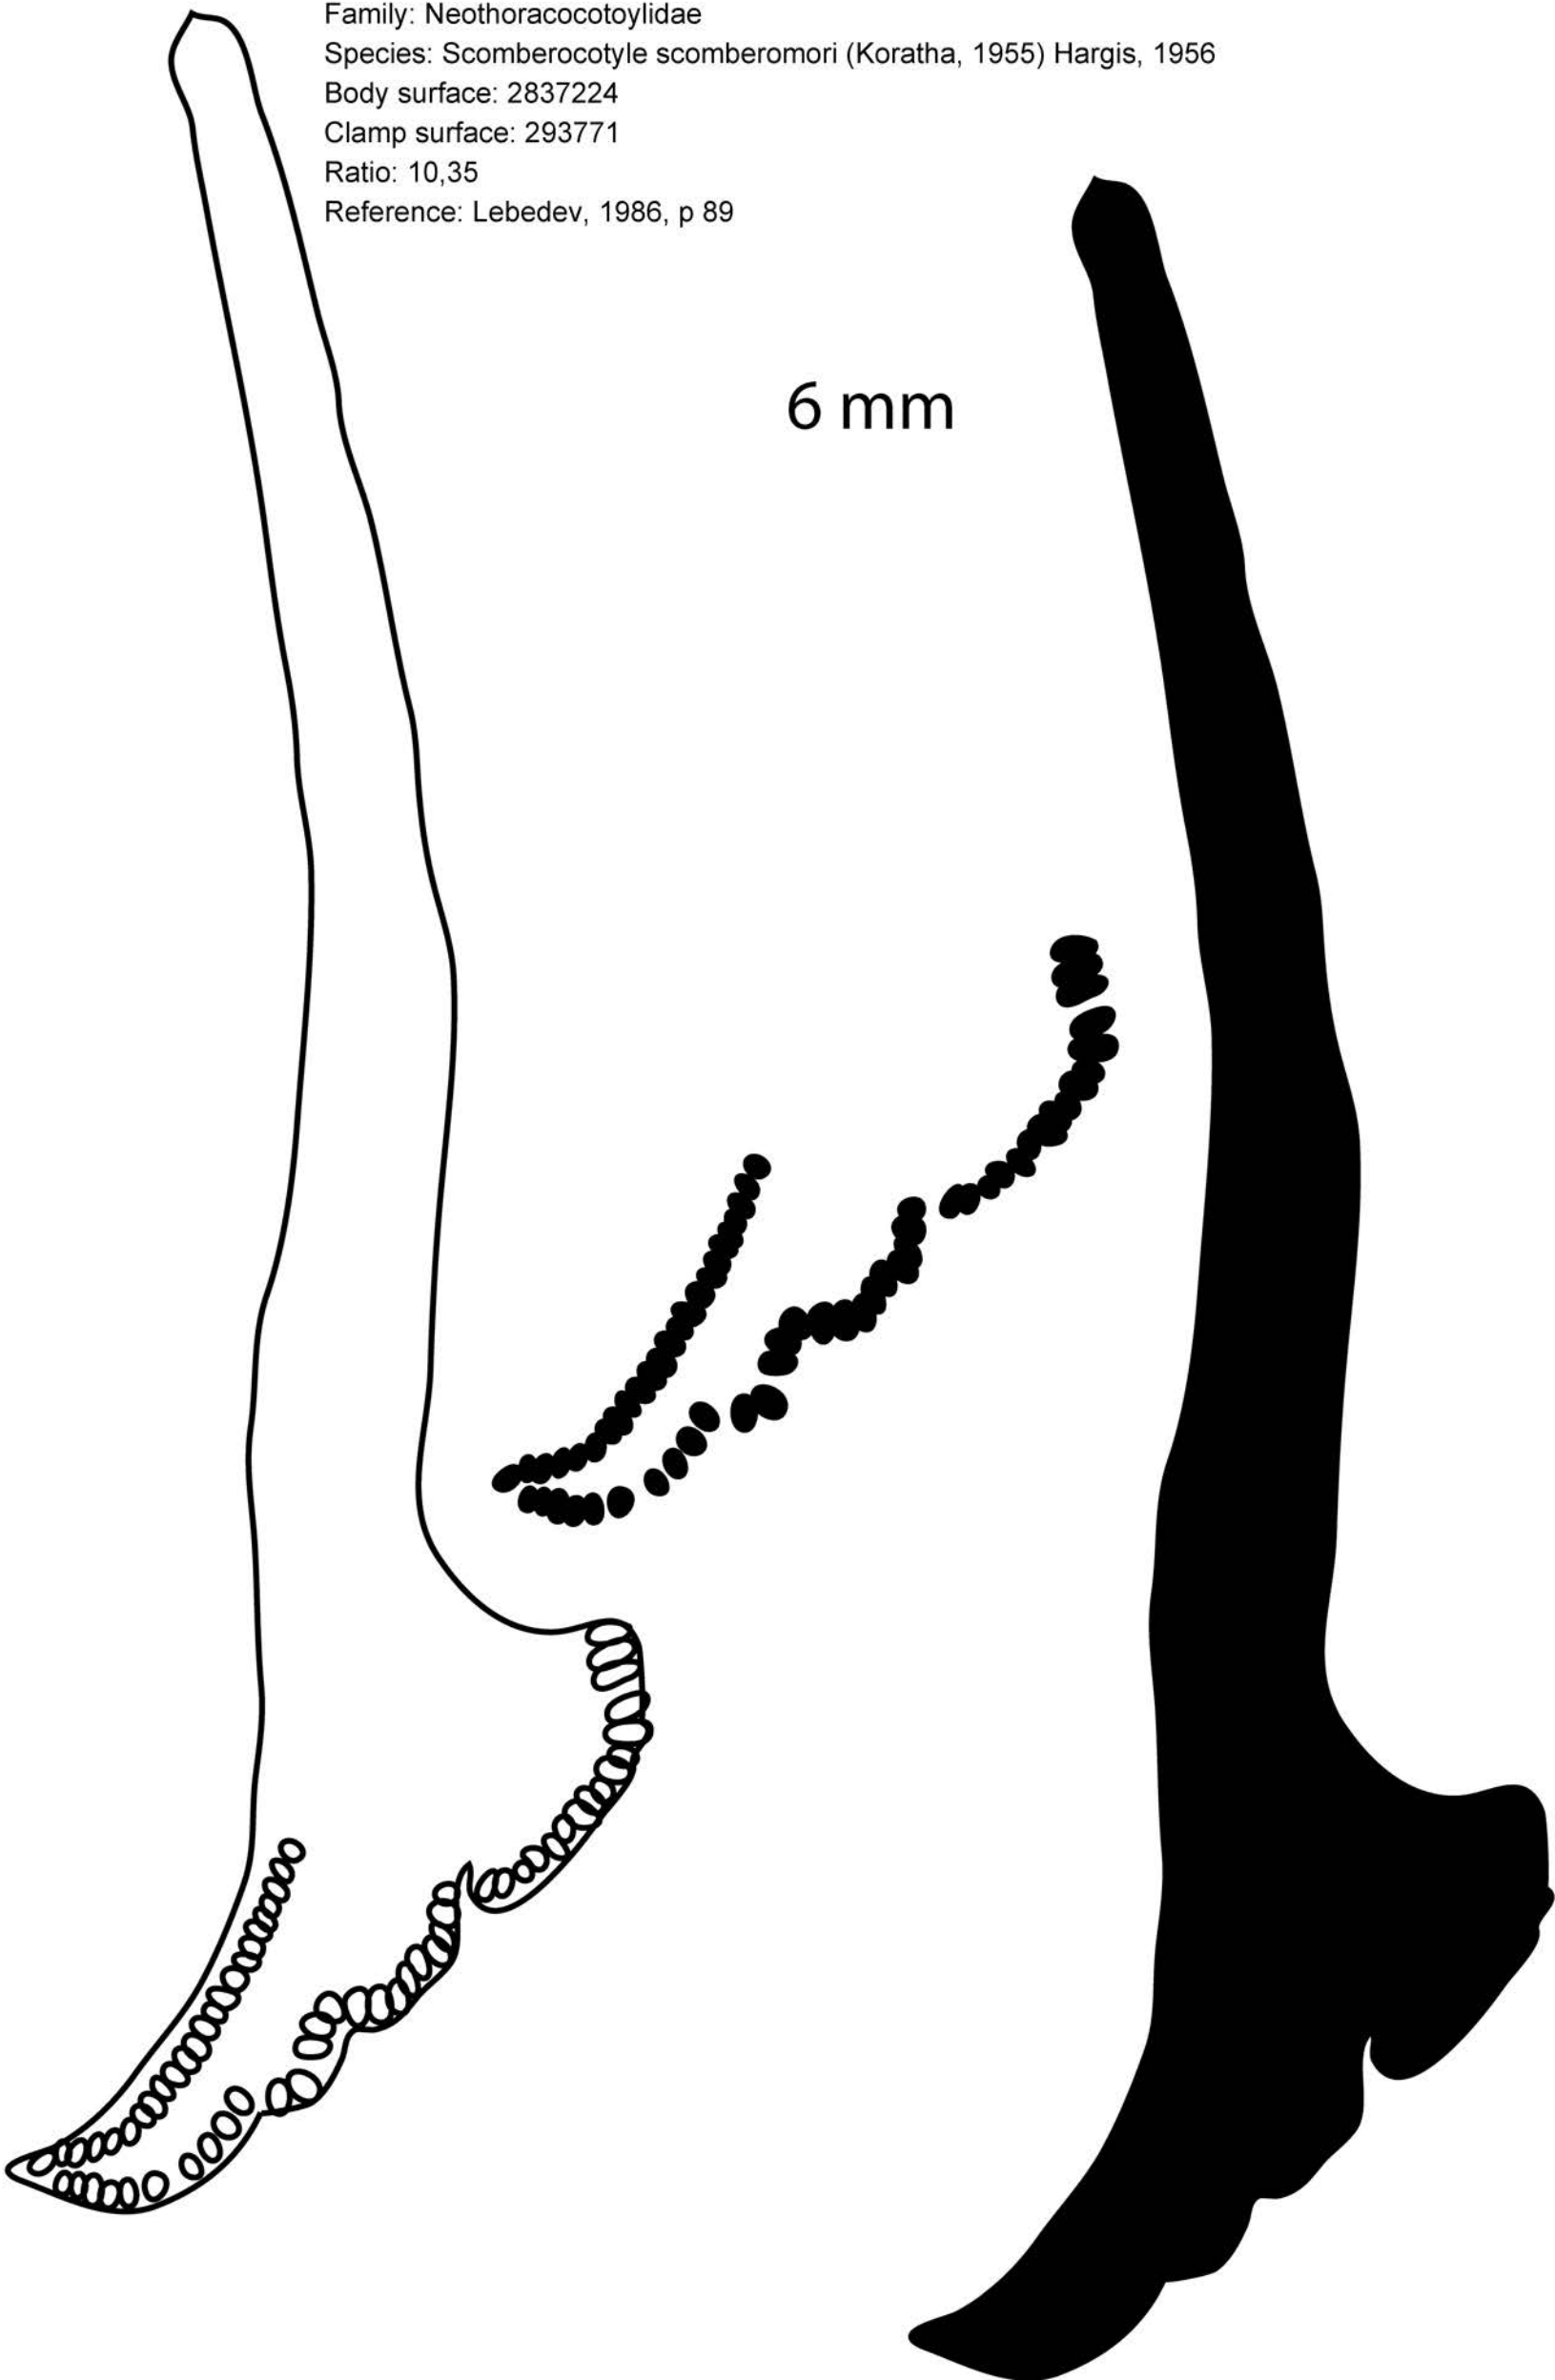

Family: Neothoracocotylidae  
Species: *Scomberomorocotyle munroi* Rohde & Hayward, 1999  
Body Surface: 640,210  
Clamp Surface: 74,389  
Ratio: 11.62  
Reference: Rohde, 1999, p. 5

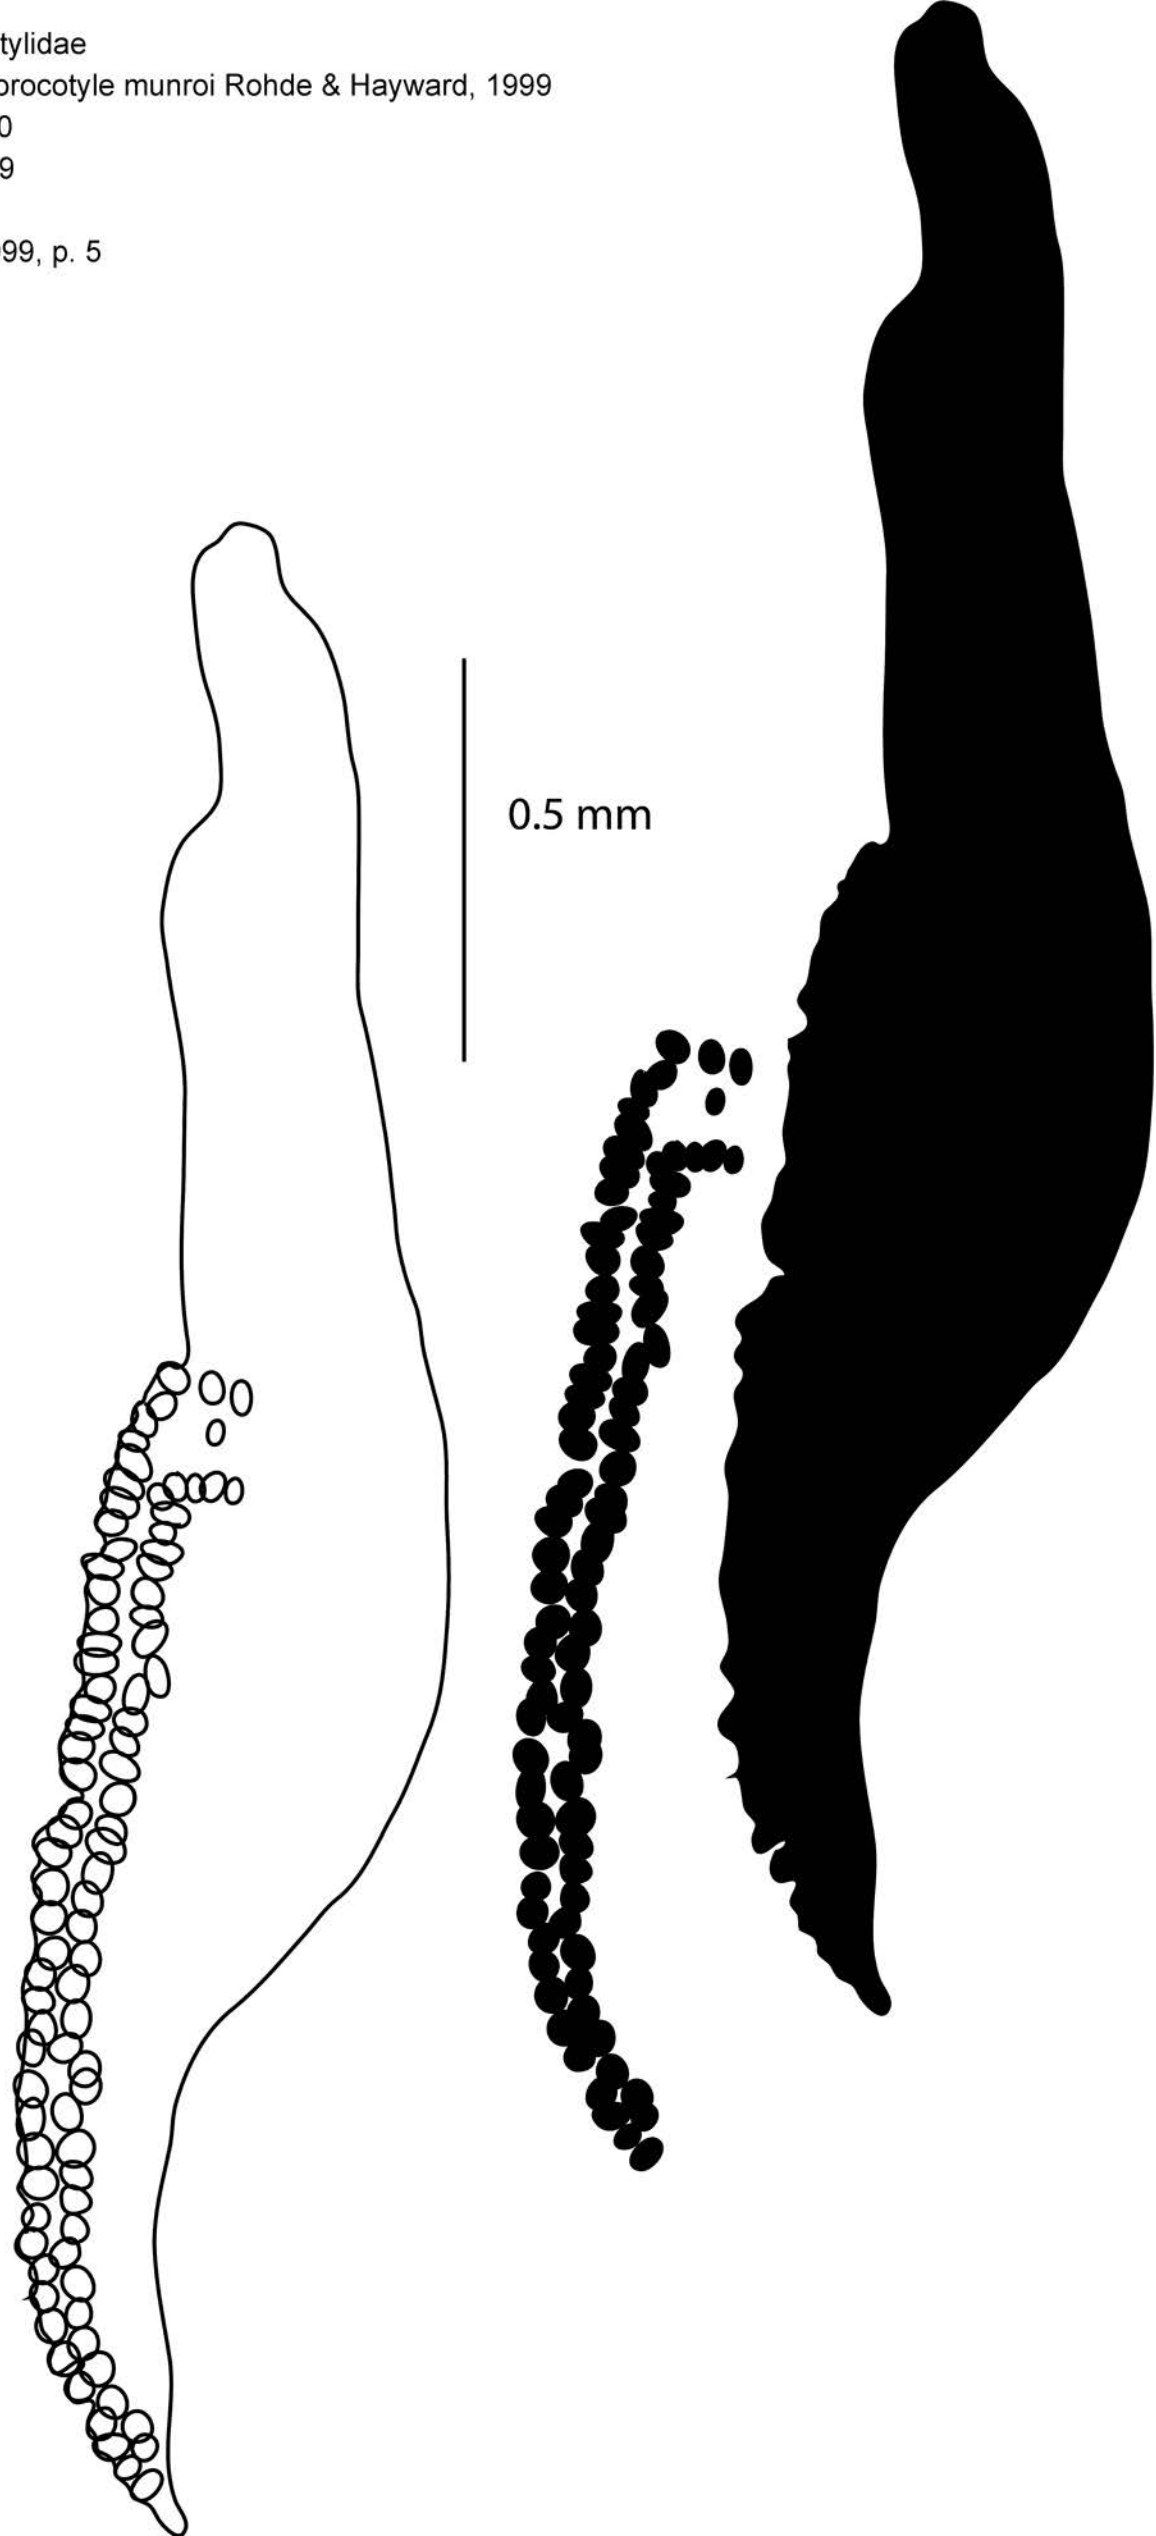

Family: Protomicrocotylidae  
Species: *Bilaterocotyle mamaevi*  
Agrawal, 1988  
Body Surface: 27,004  
Clamp Surface: 485  
Ratio: 1.80  
Reference: Pandey, 2008, p. 352

0.05 mm

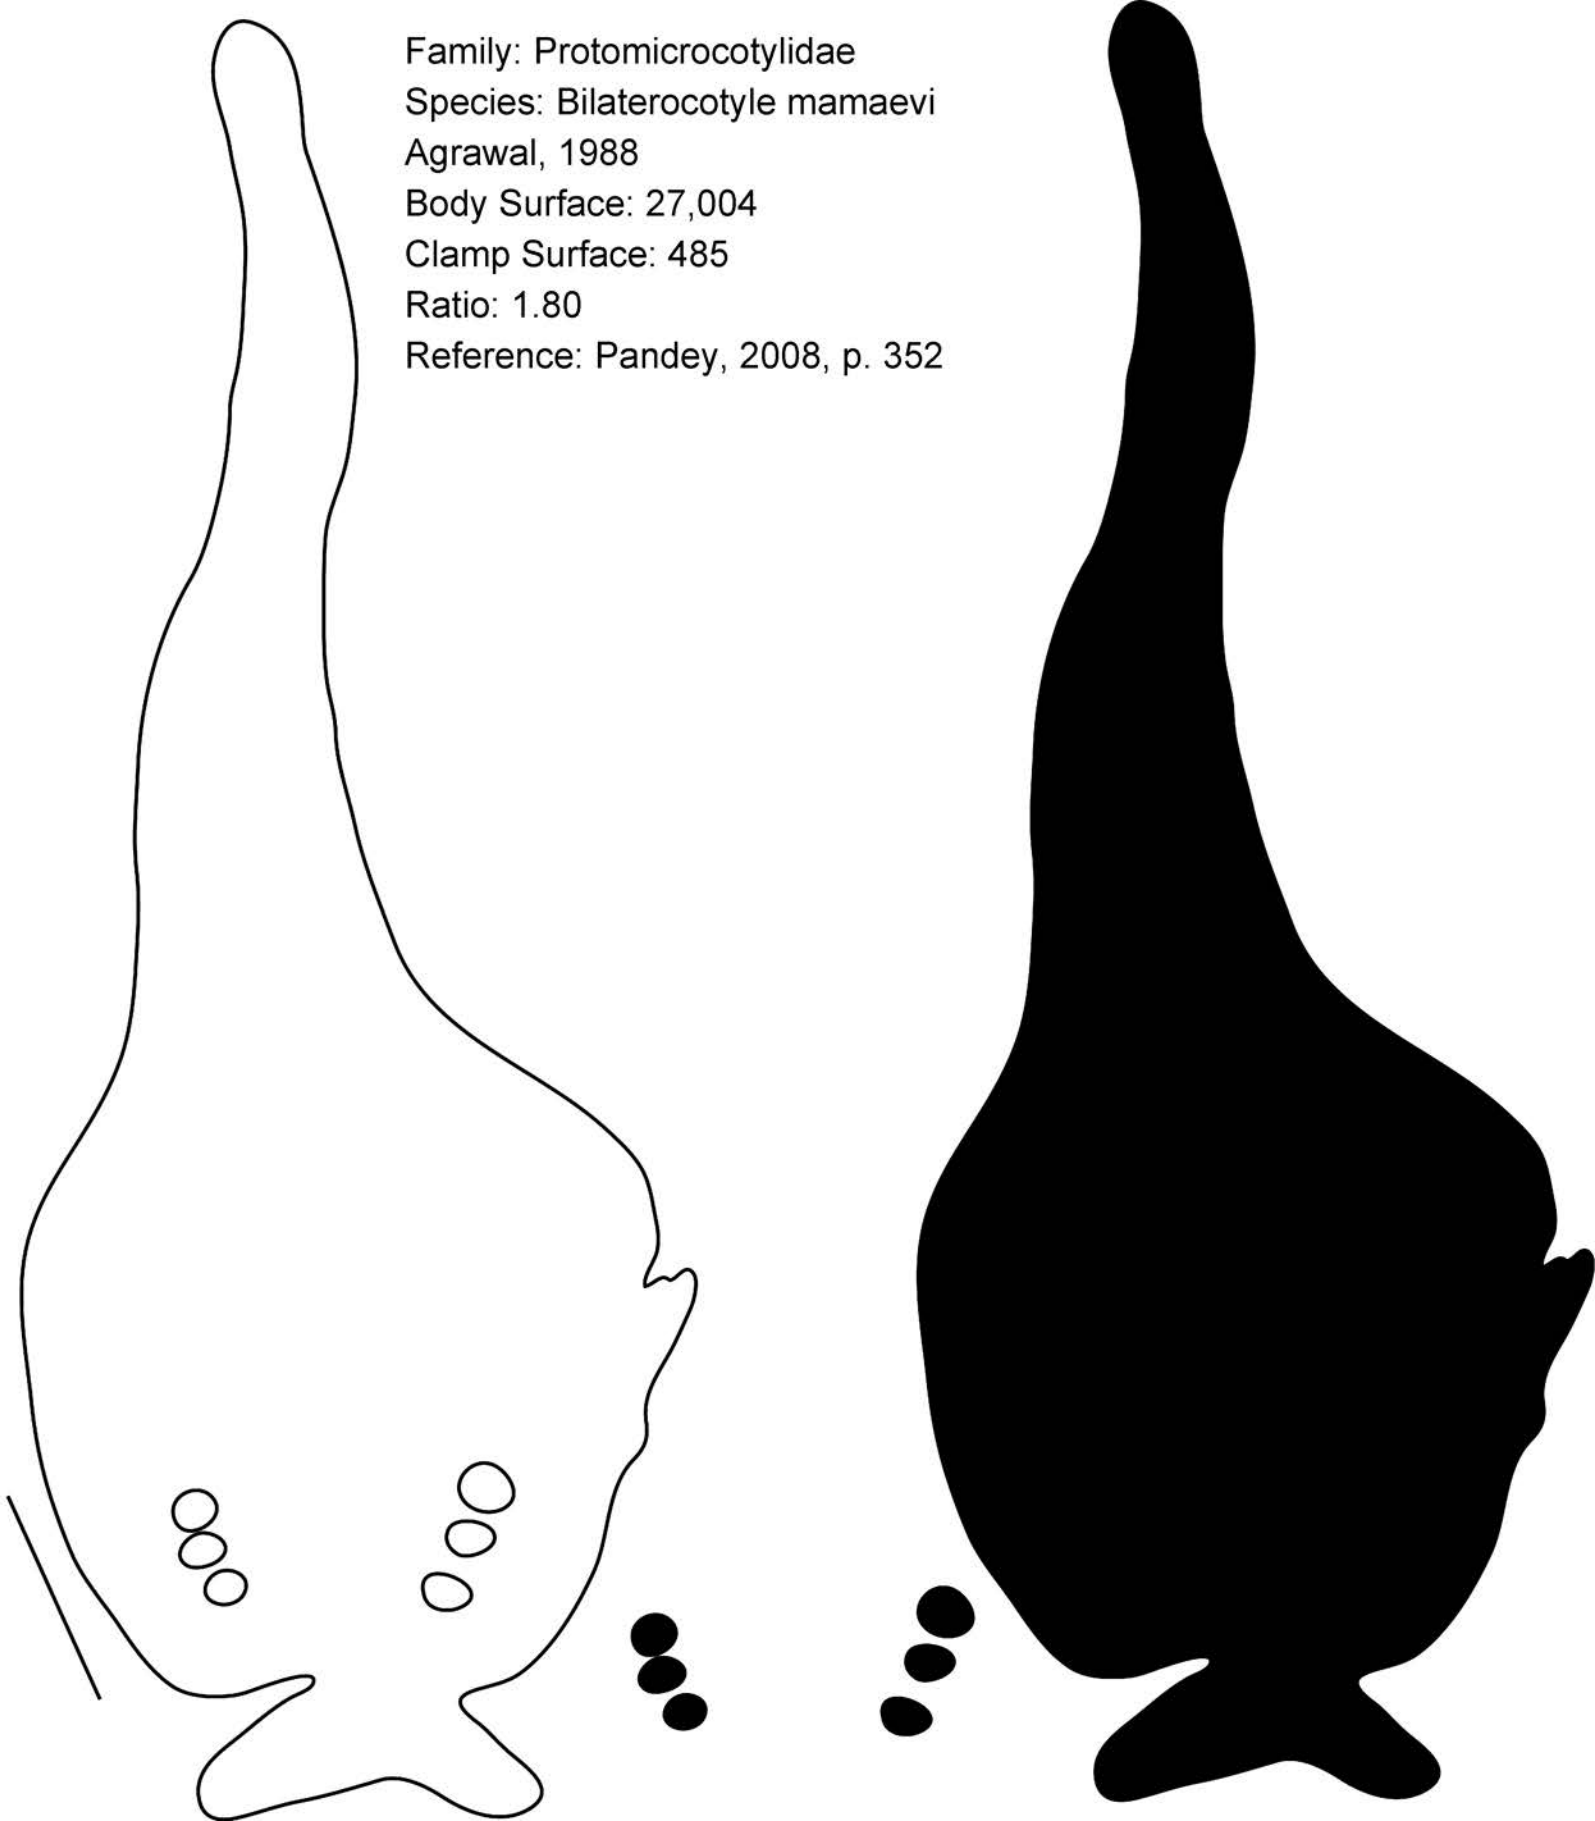



Family: Protomicrocotylidae

Species: *Bilaterocotyle chirocentrosus* Chauhan, 1945

Body Surface: 670,131

Clamp Surface: 15,726

Ratio: 2.35

Reference: Chauhan, 1945, p. 138

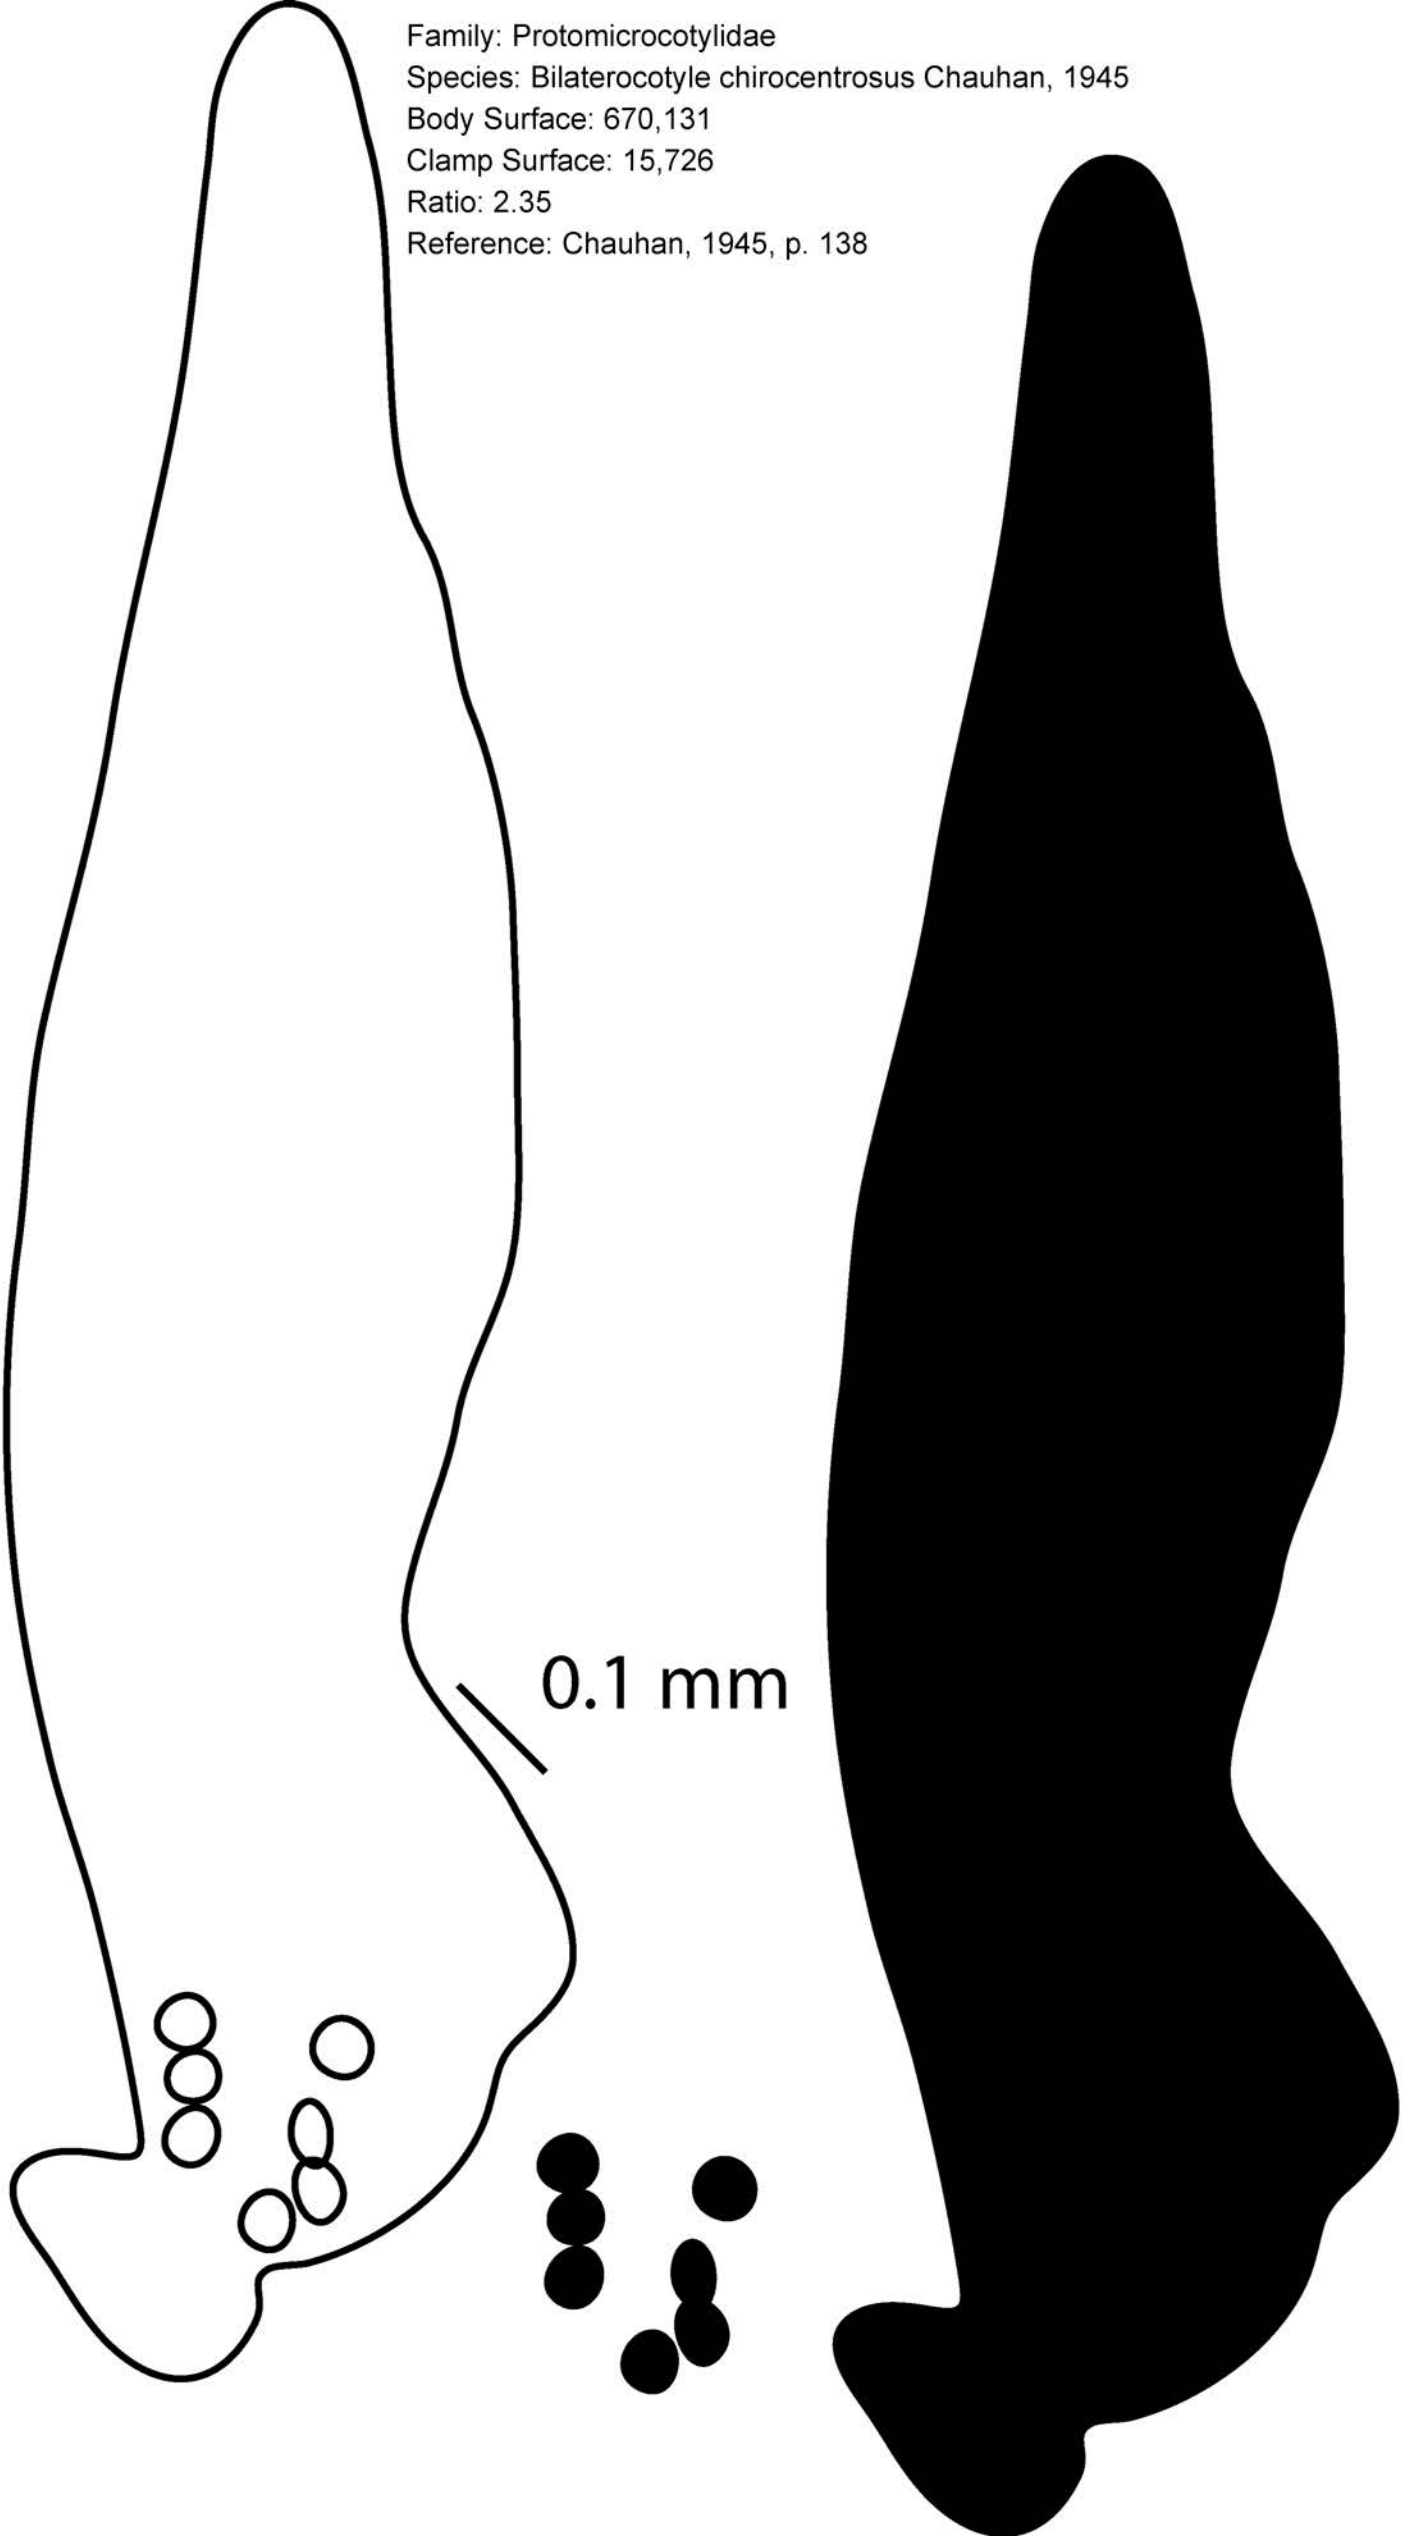

Family: Protomicrocotylidae  
Species: *Bilaterocotyle lucknowensis*  
(Agrawal & Sharma, 1986)  
Pandey & Agrawal, 2008  
Body Surface: 92,963  
Clamp Surface: 2,413  
Ratio: 2.60  
Reference: Pandey, 2008, p. 350

0.2 mm

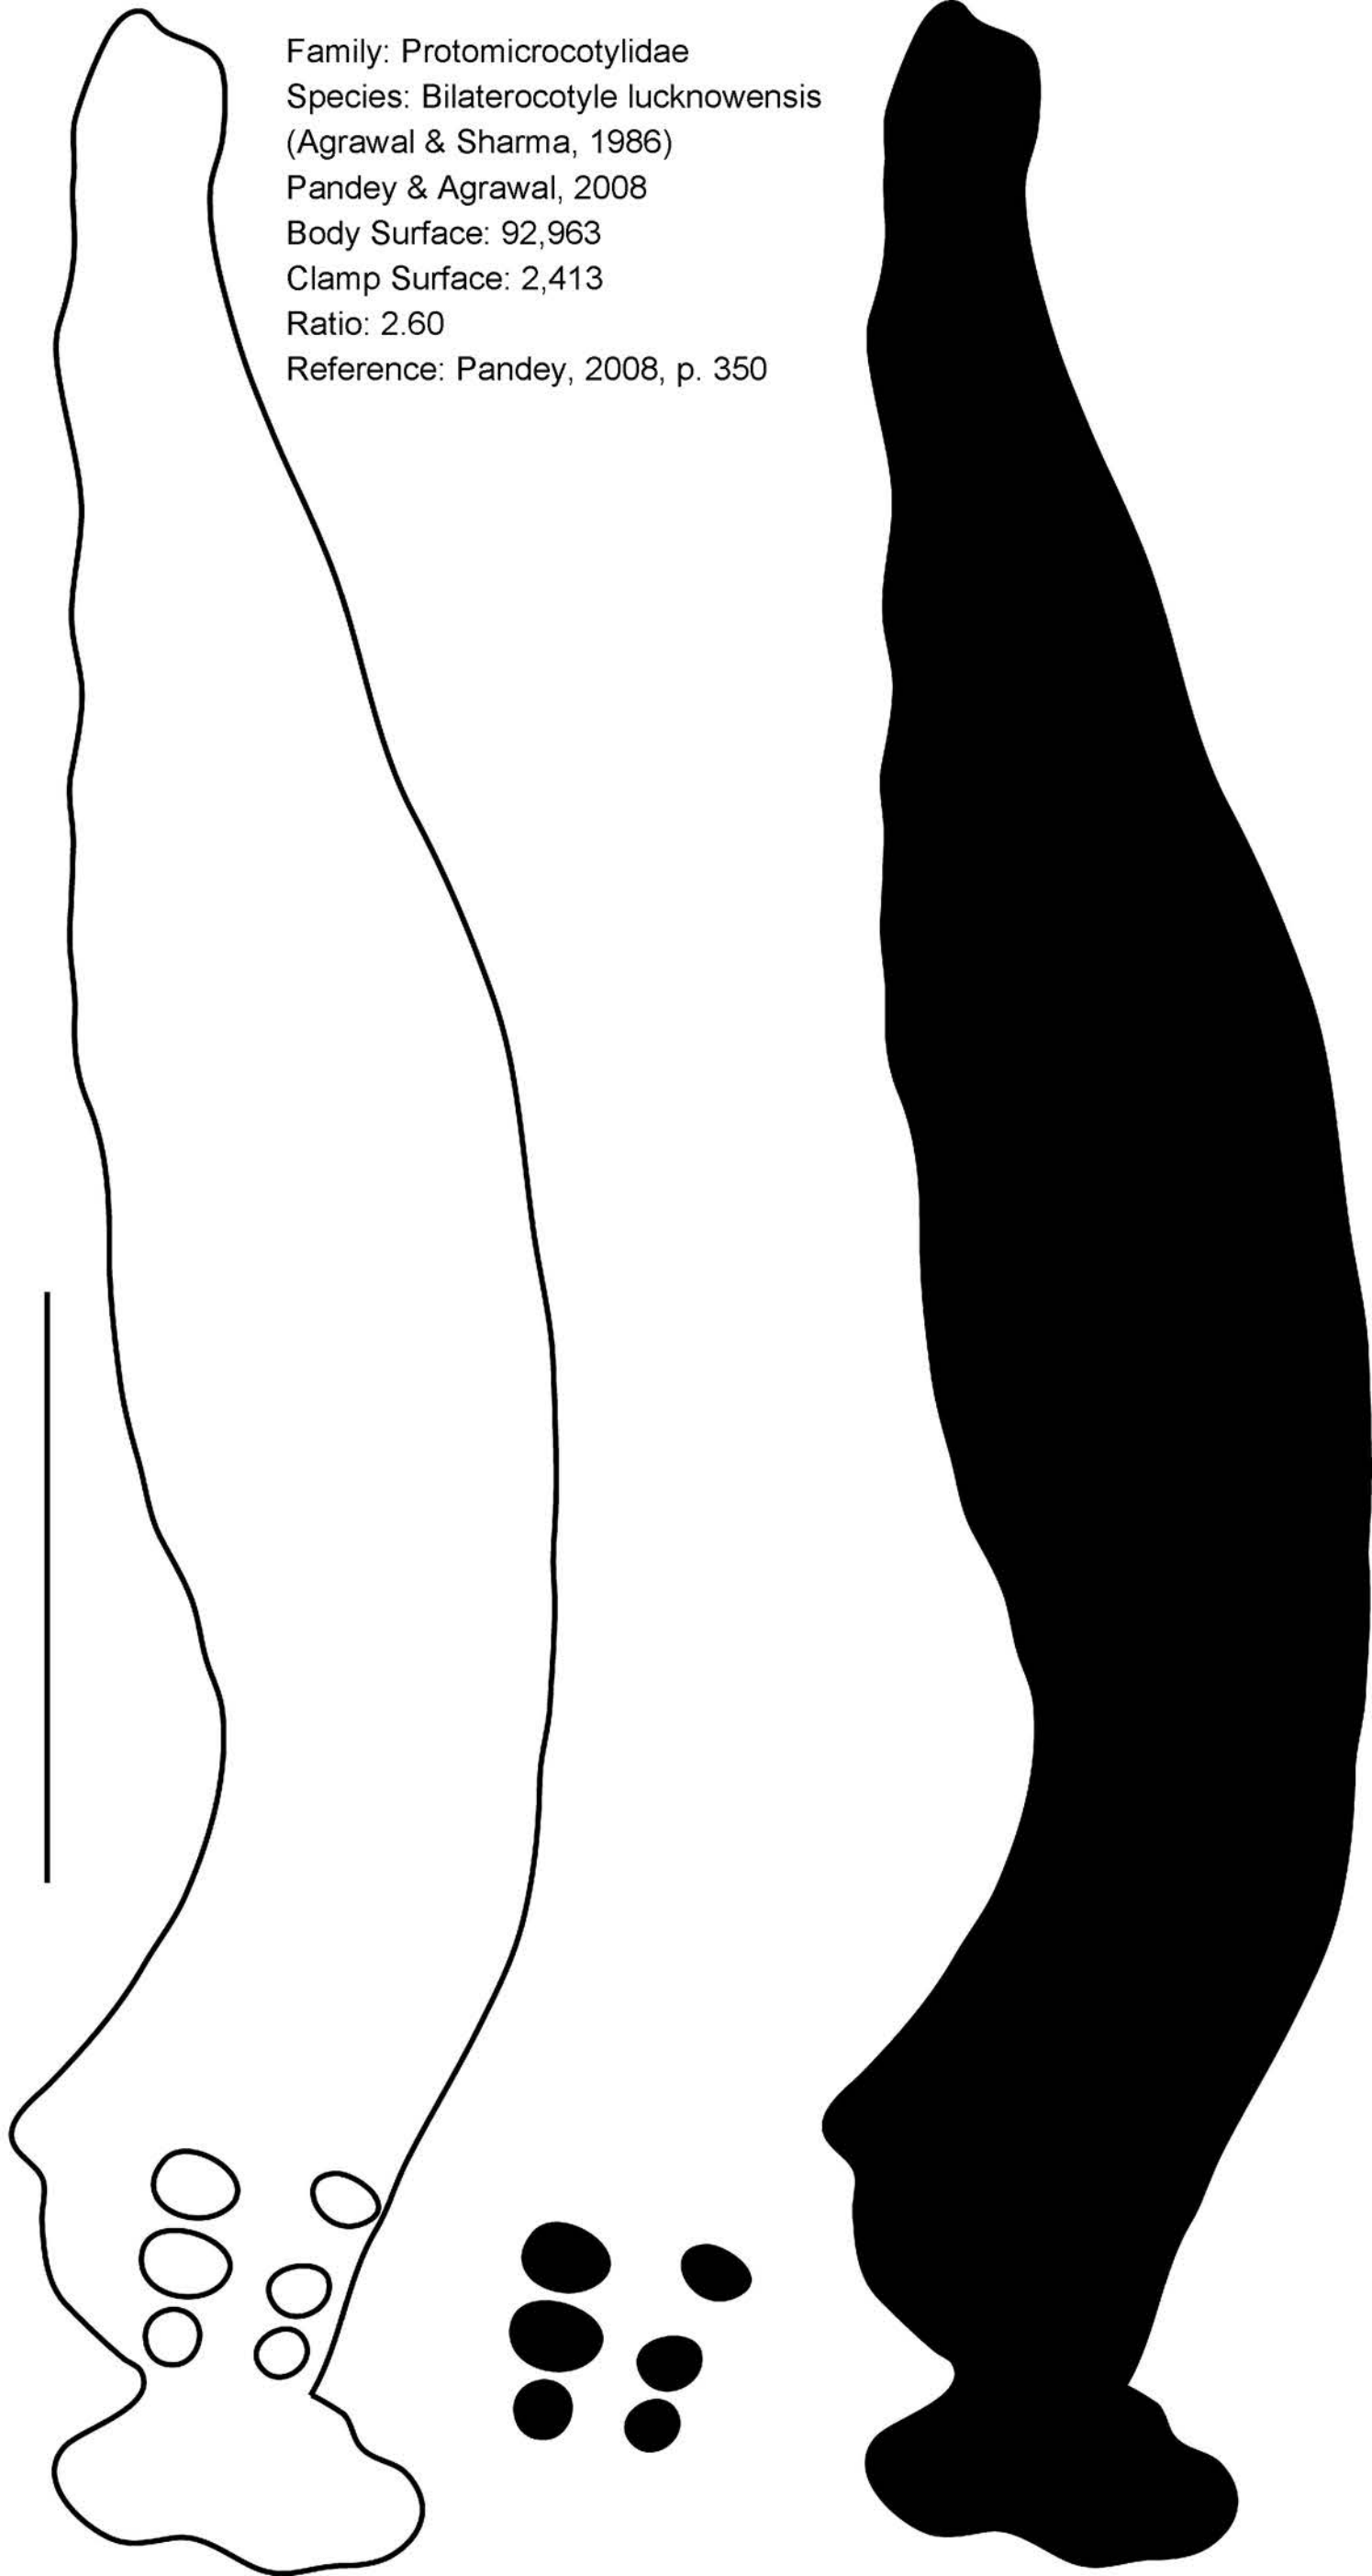

1 mm

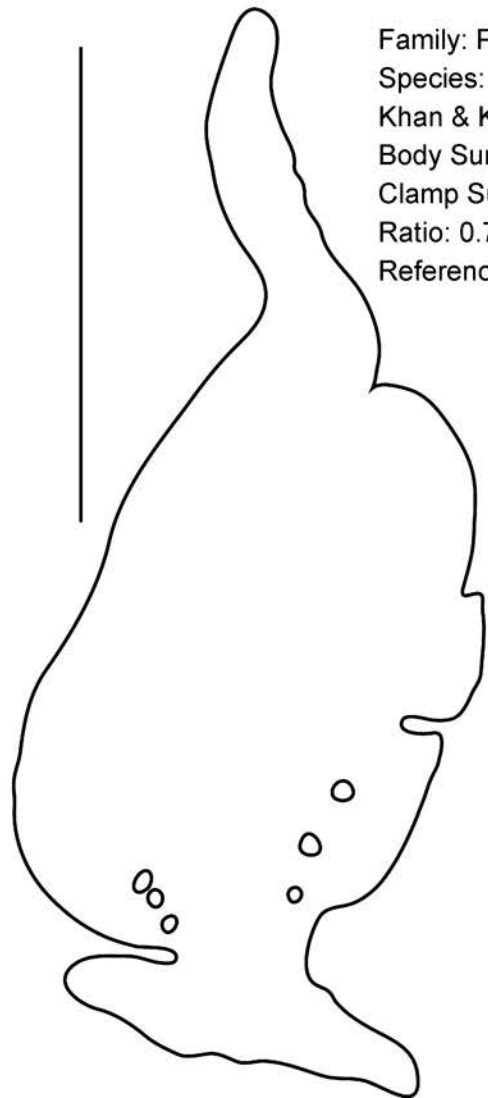

Family: Protomicrocotylidae

Species: *Bilaterocotyle multitesticularis*

Khan & Karyakarte, 1982

Body Surface: 1,180,417

Clamp Surface: 9,192

Ratio: 0.78

Reference: Pandey, 2008, p. 349

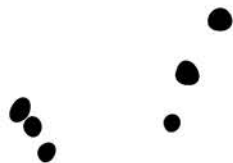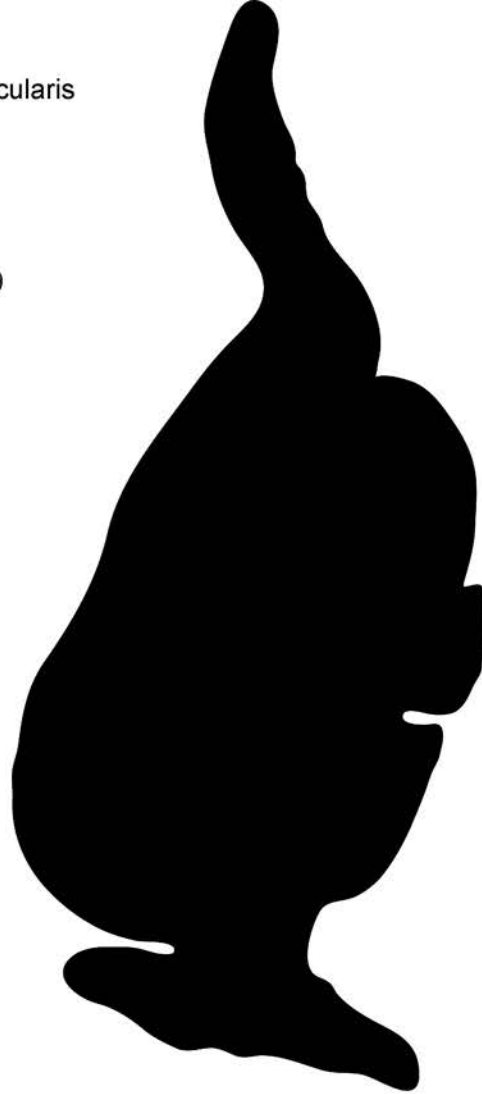

Family: Protomicrocotylidae

Species: *Bilaterocotyle polynemusi*

Gupta & Krishna, 1980

Body Surface: 1,358,610

Clamp Surface: 15,508

Ratio: 1.14

Reference: Pandey, 2008, p. 347

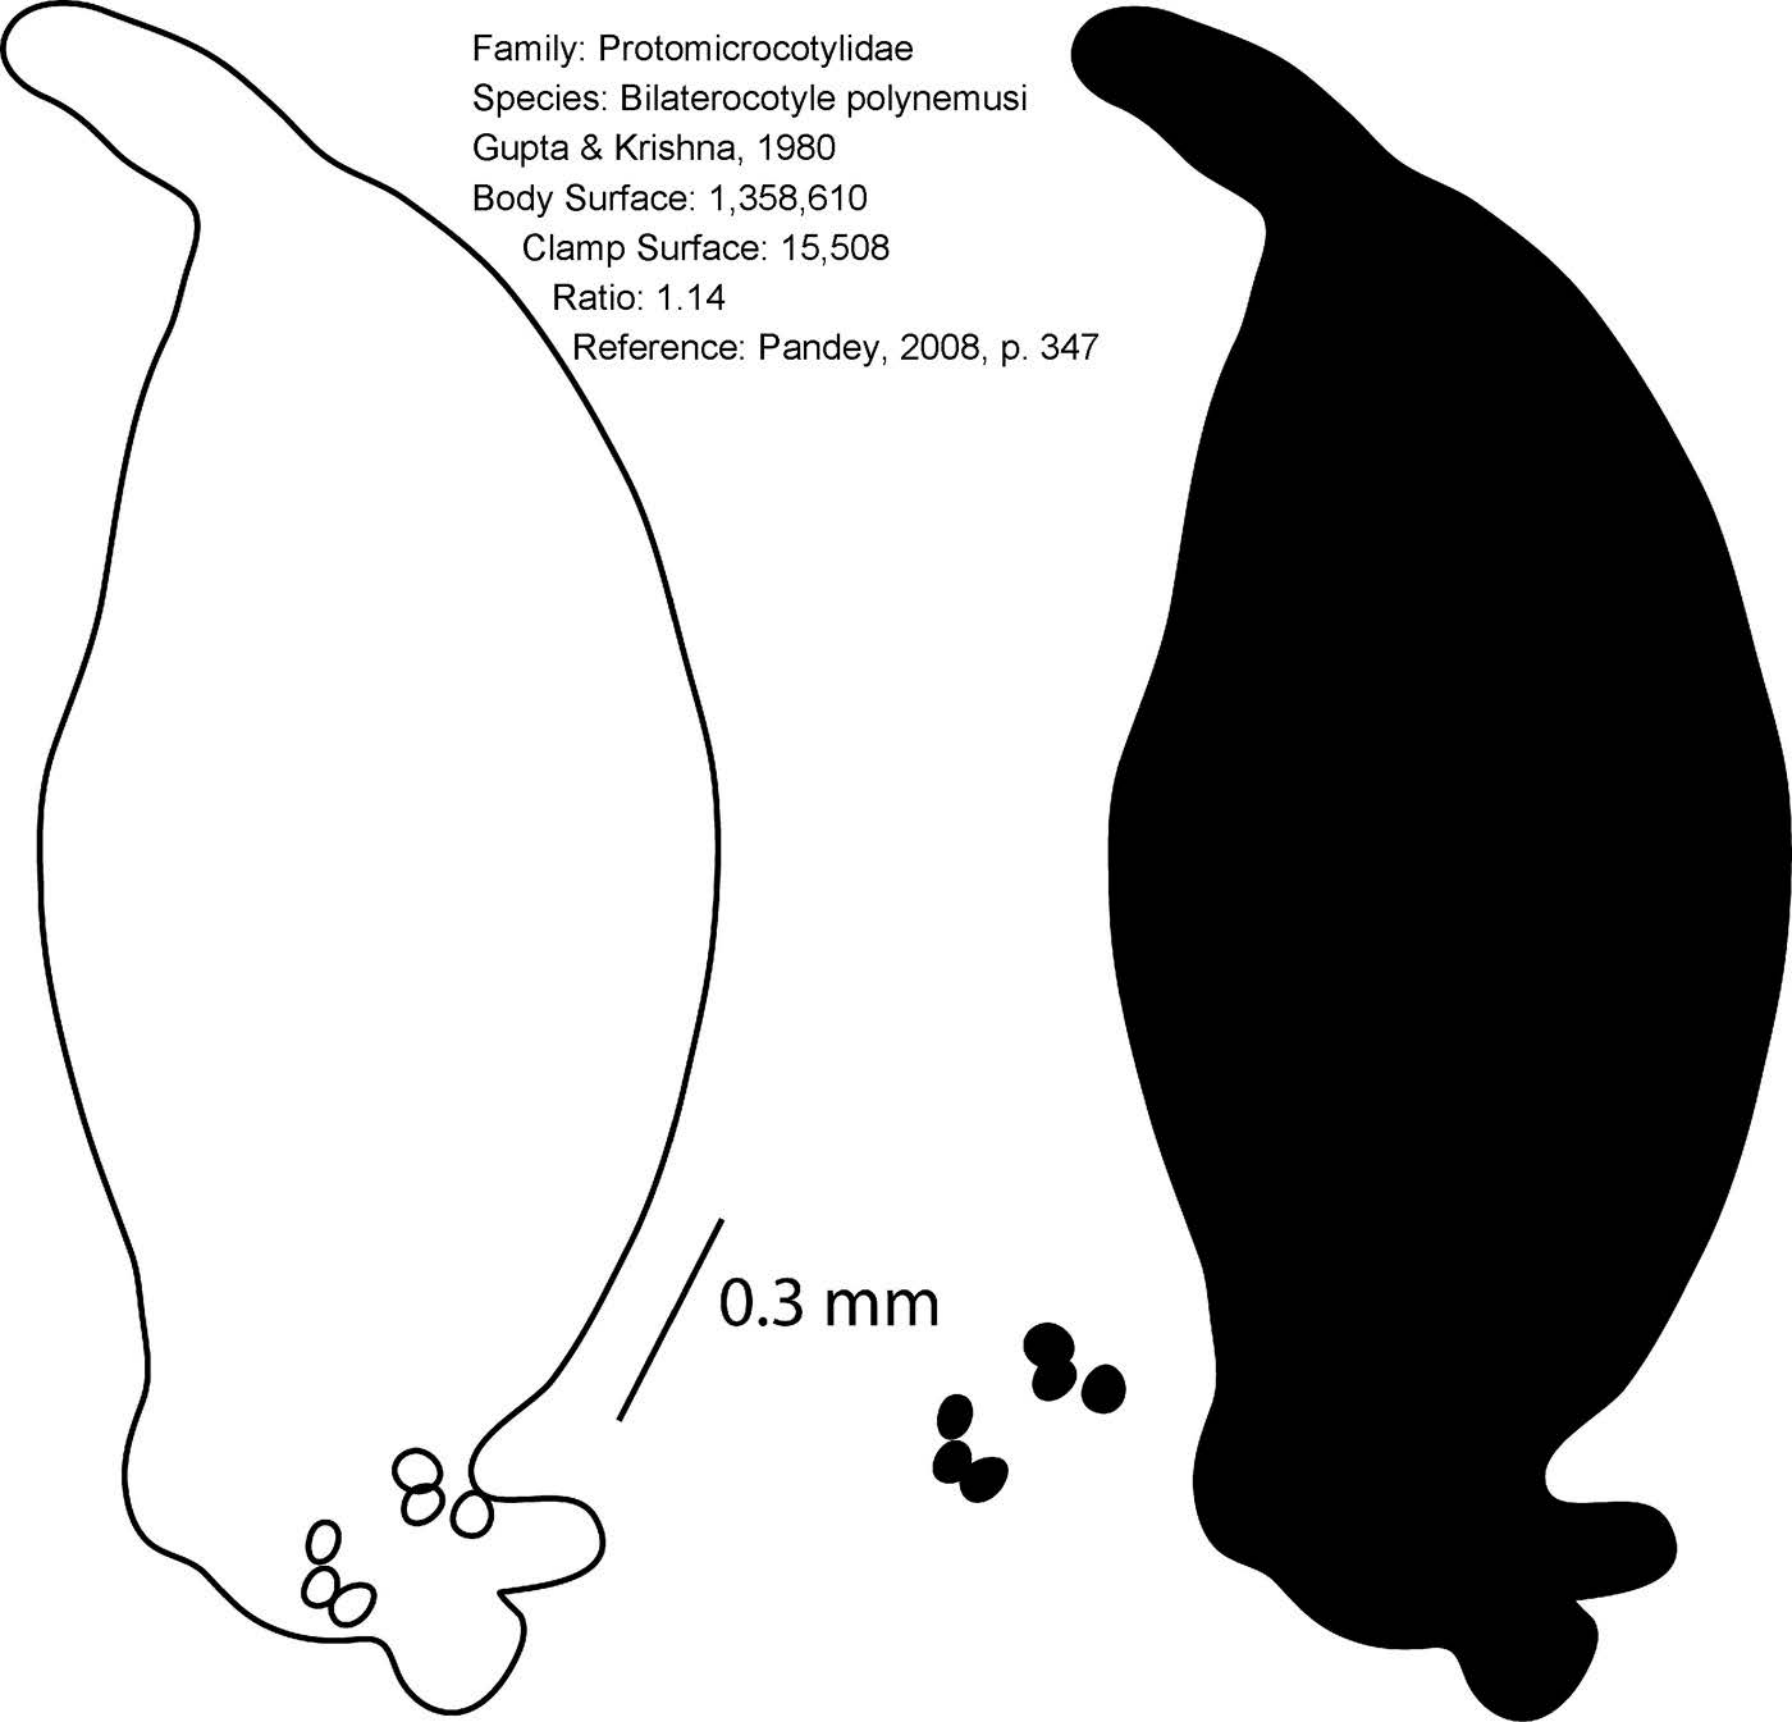

Family: Protomicrocotylidae  
Species: *Bilaterocotyle spindalis*  
Deo & Karyakarte, 1980  
Body Surface: 1,659,994  
Clamp Surface: 45,651  
Ratio: 2.75  
Reference: Pandey, 2008, p. 348

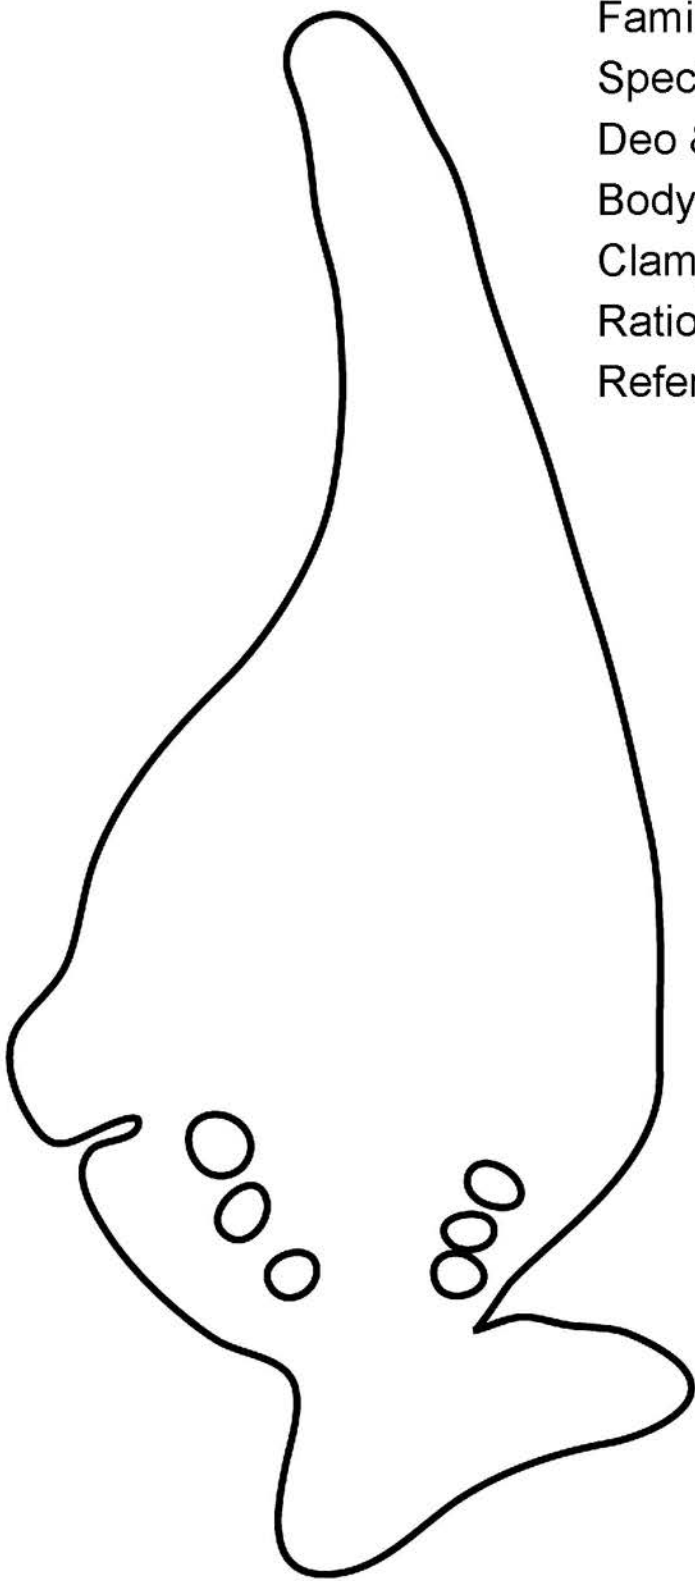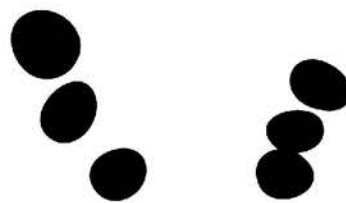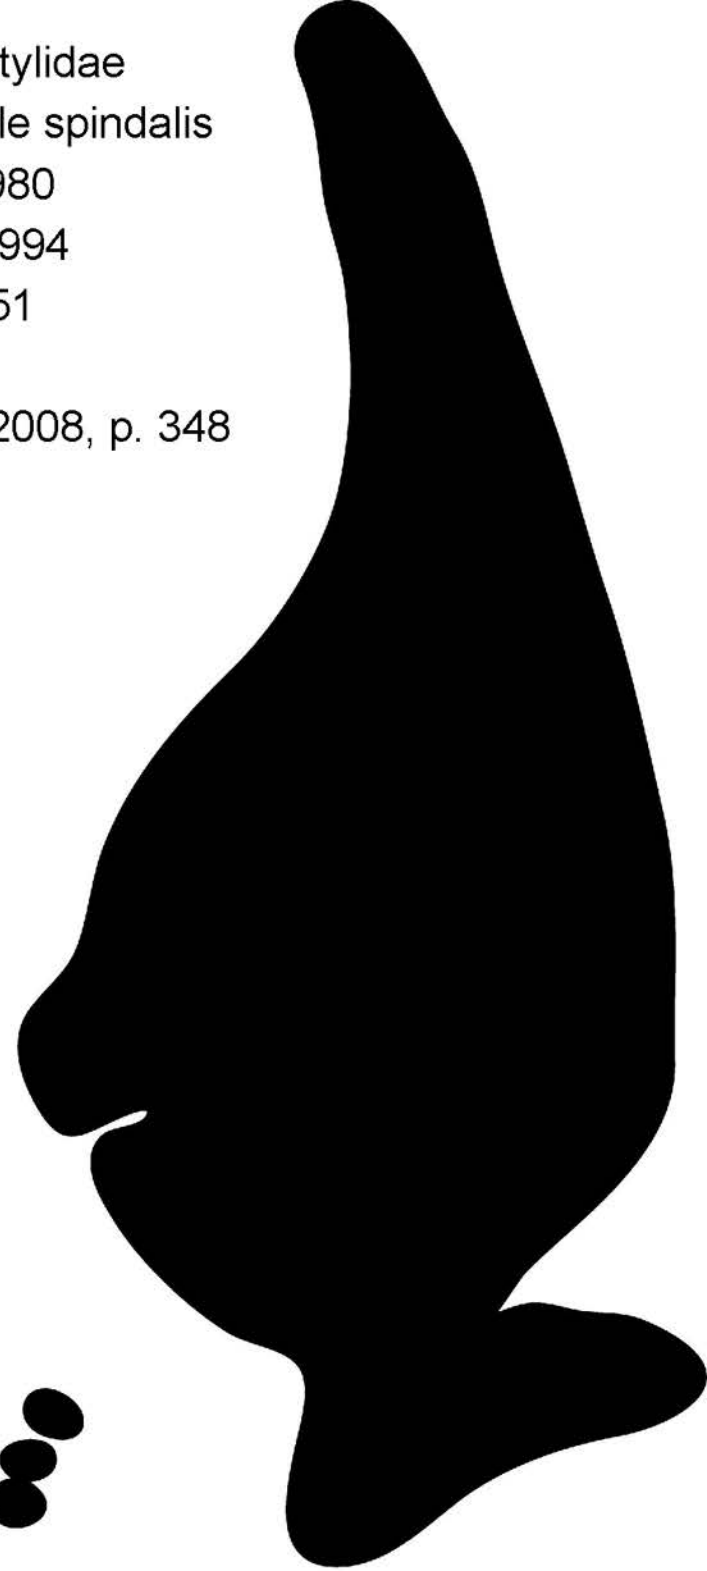

1 mm

Family: Protomicrocotylidae

Species: *Bilaterocotyloides carangis* Ramalingam, 1961

Body Surface: 1,135,204

Clamp Surface: 13,434

Ratio: 1.18

Reference: Lebedev, 1986, p. 114

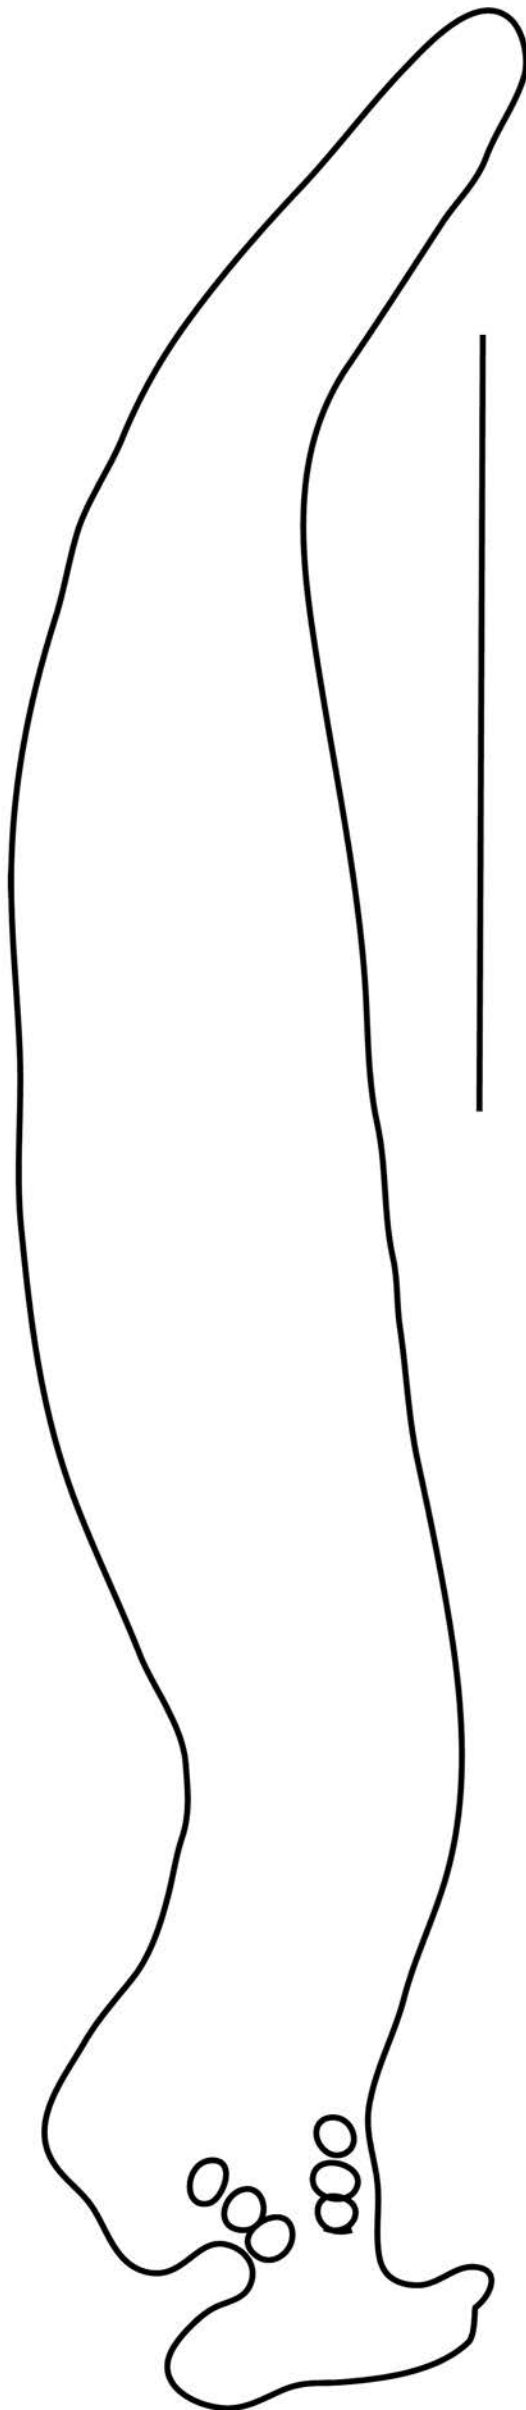

1 mm

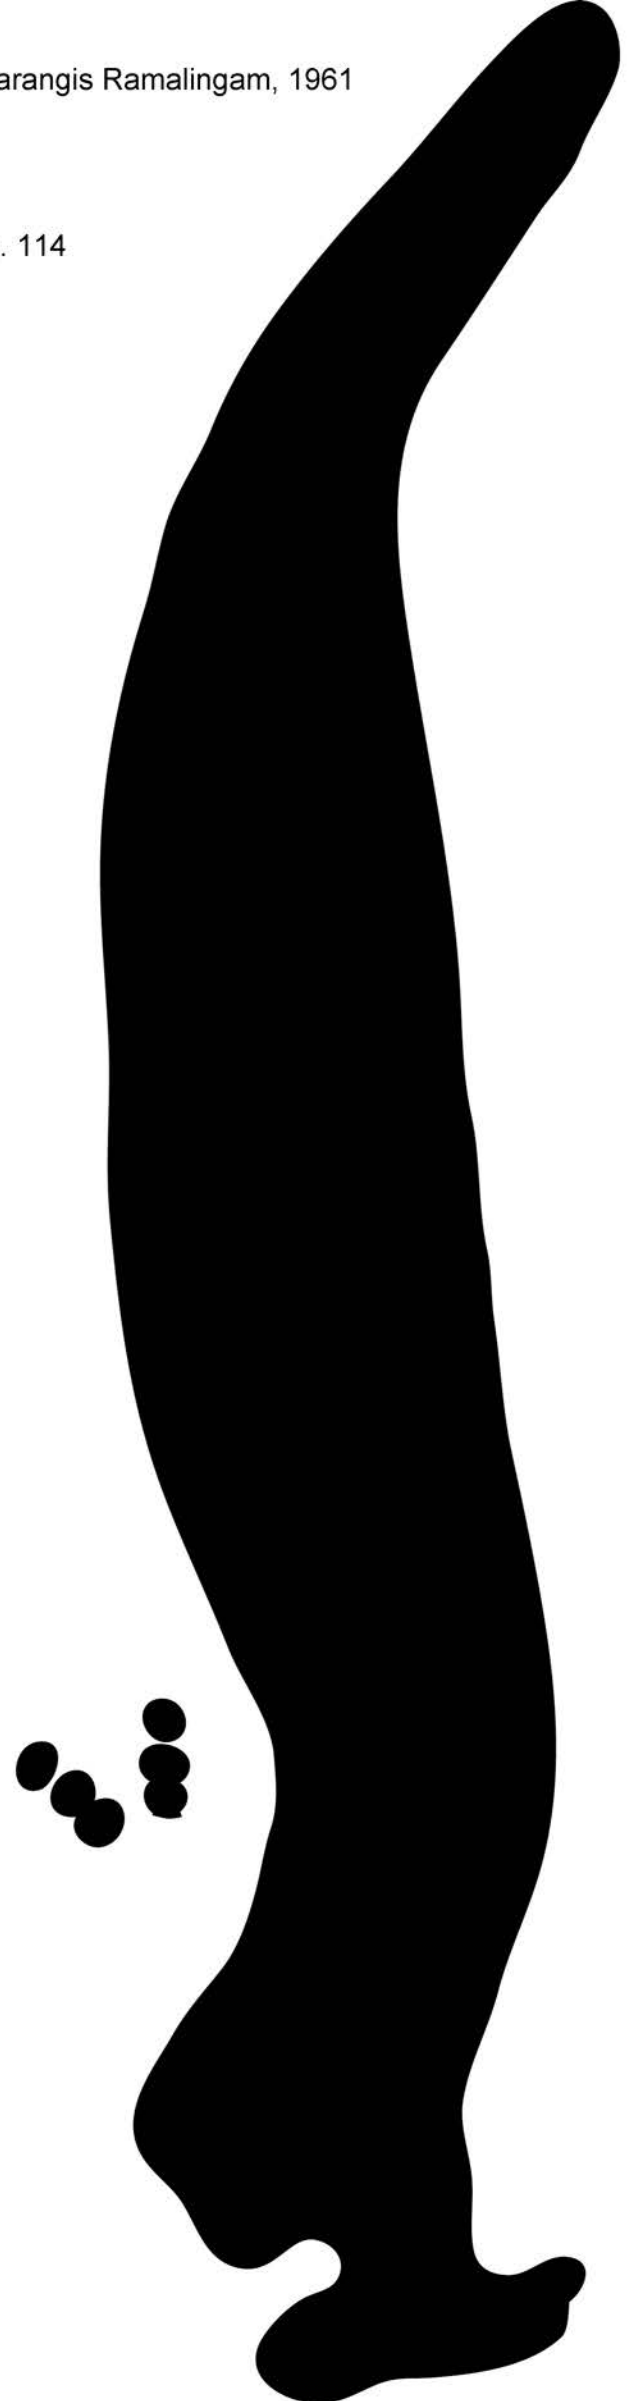

Family: Protomicrocotylidae

Species: *Bilaterocotyloides madrasensis* Radha, 1966

Body Surface: 441,228

Clamp Surface: 4,984

Ratio: 1.13

Reference: Lebedev, 1986, p. 116

0.5 mm

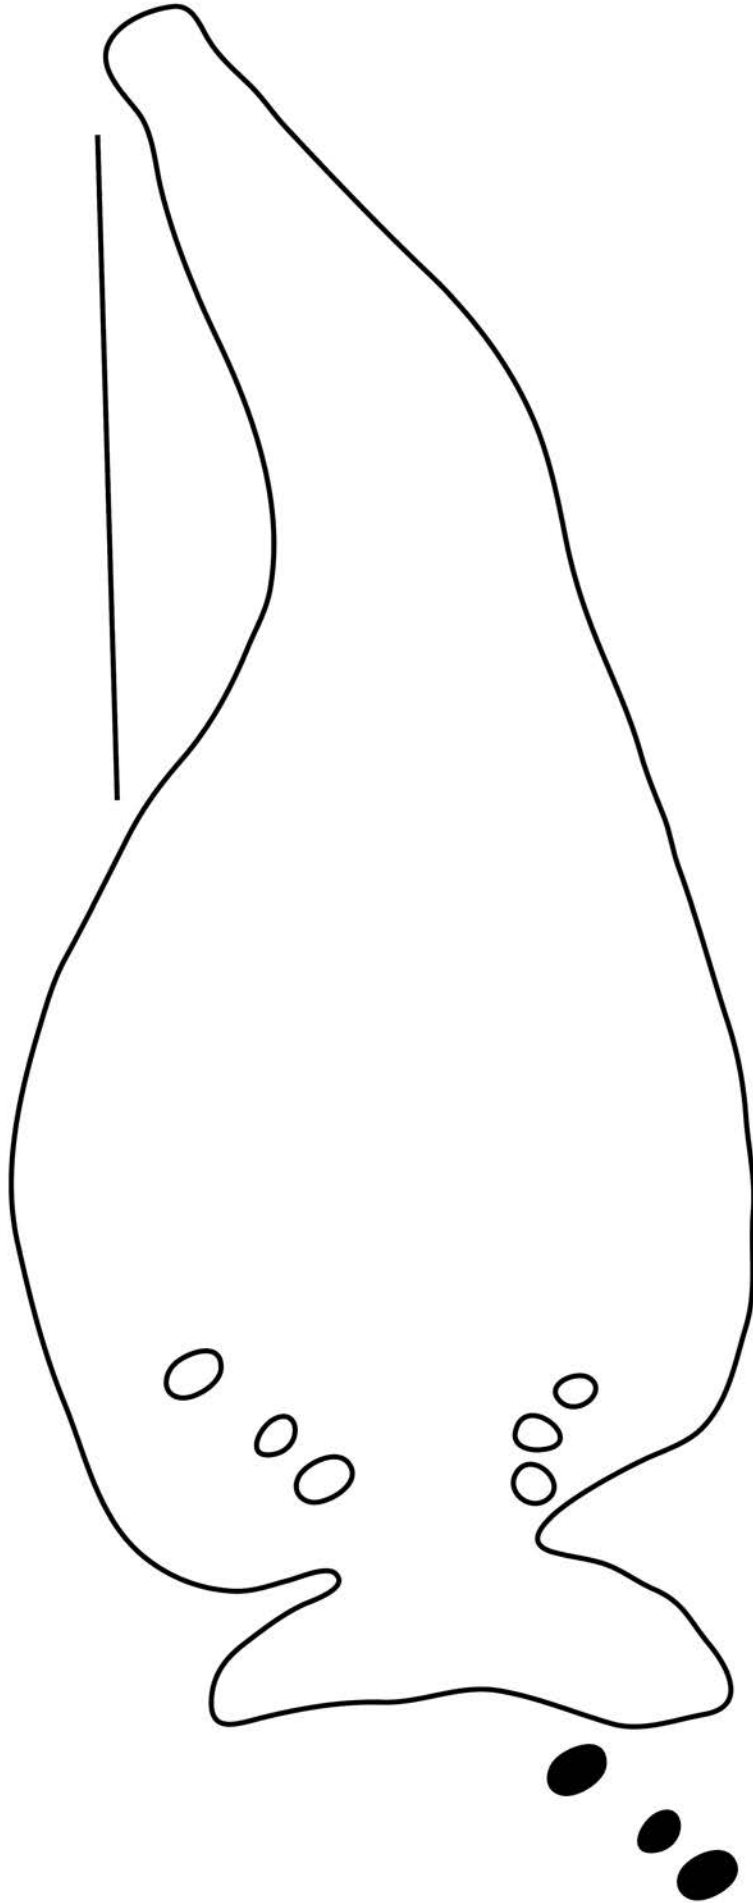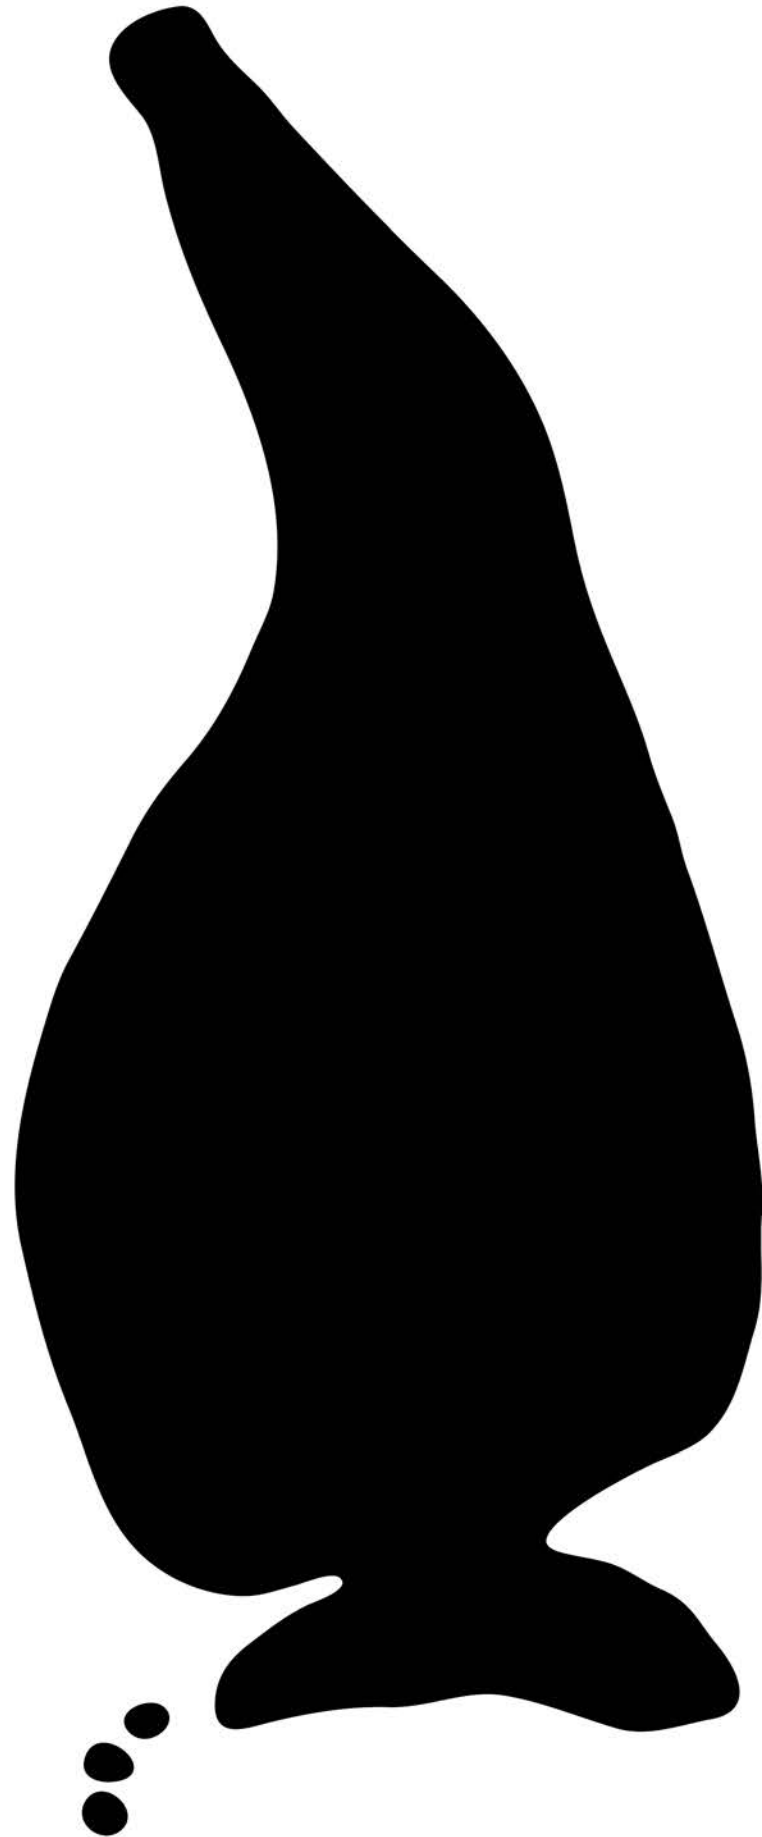

Family: Protomicrocotyliidae

Species: Bilaterocotyloides novaeguineae (Rohde, 1977) Lebedev, 1986

Body Surface: 442,980

Clamp Surface: 11,411

Ratio: 2.58

Reference: Lebedev, 1986, p. 114

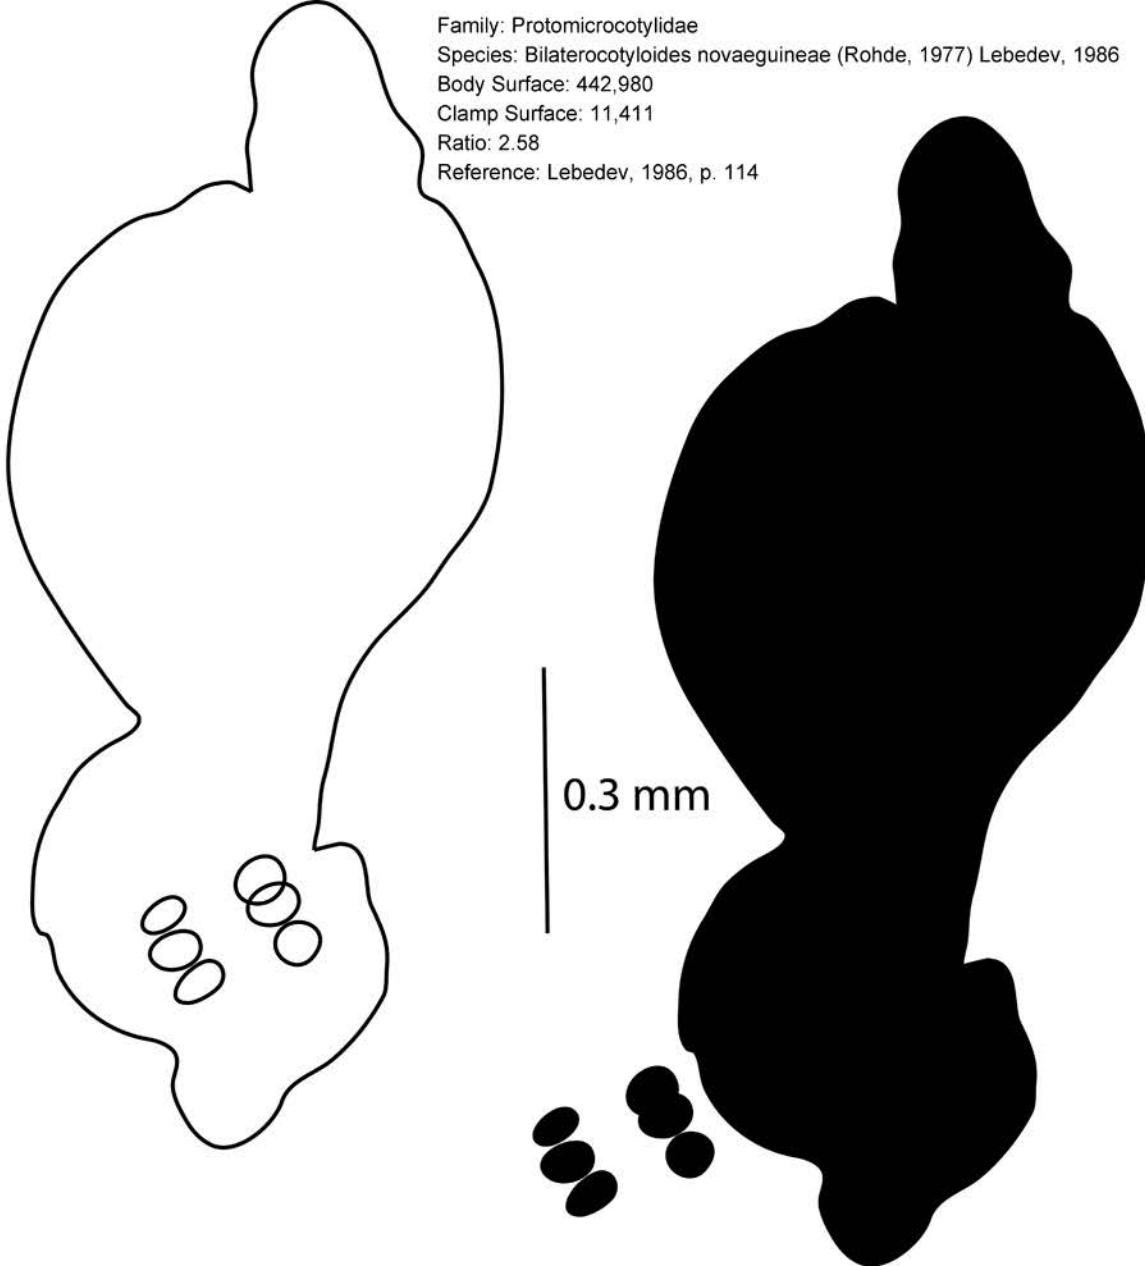



Family: Protomicrocotylidae

Species: *Bilaterocotyloides spinulosus*

Liu in Zhang, Yang & Liu, 2001

Body Surface: 2,197,940

Clamp Surface: 11,976

Ratio: 0.54

Reference: Zhang, 2001, p. 247

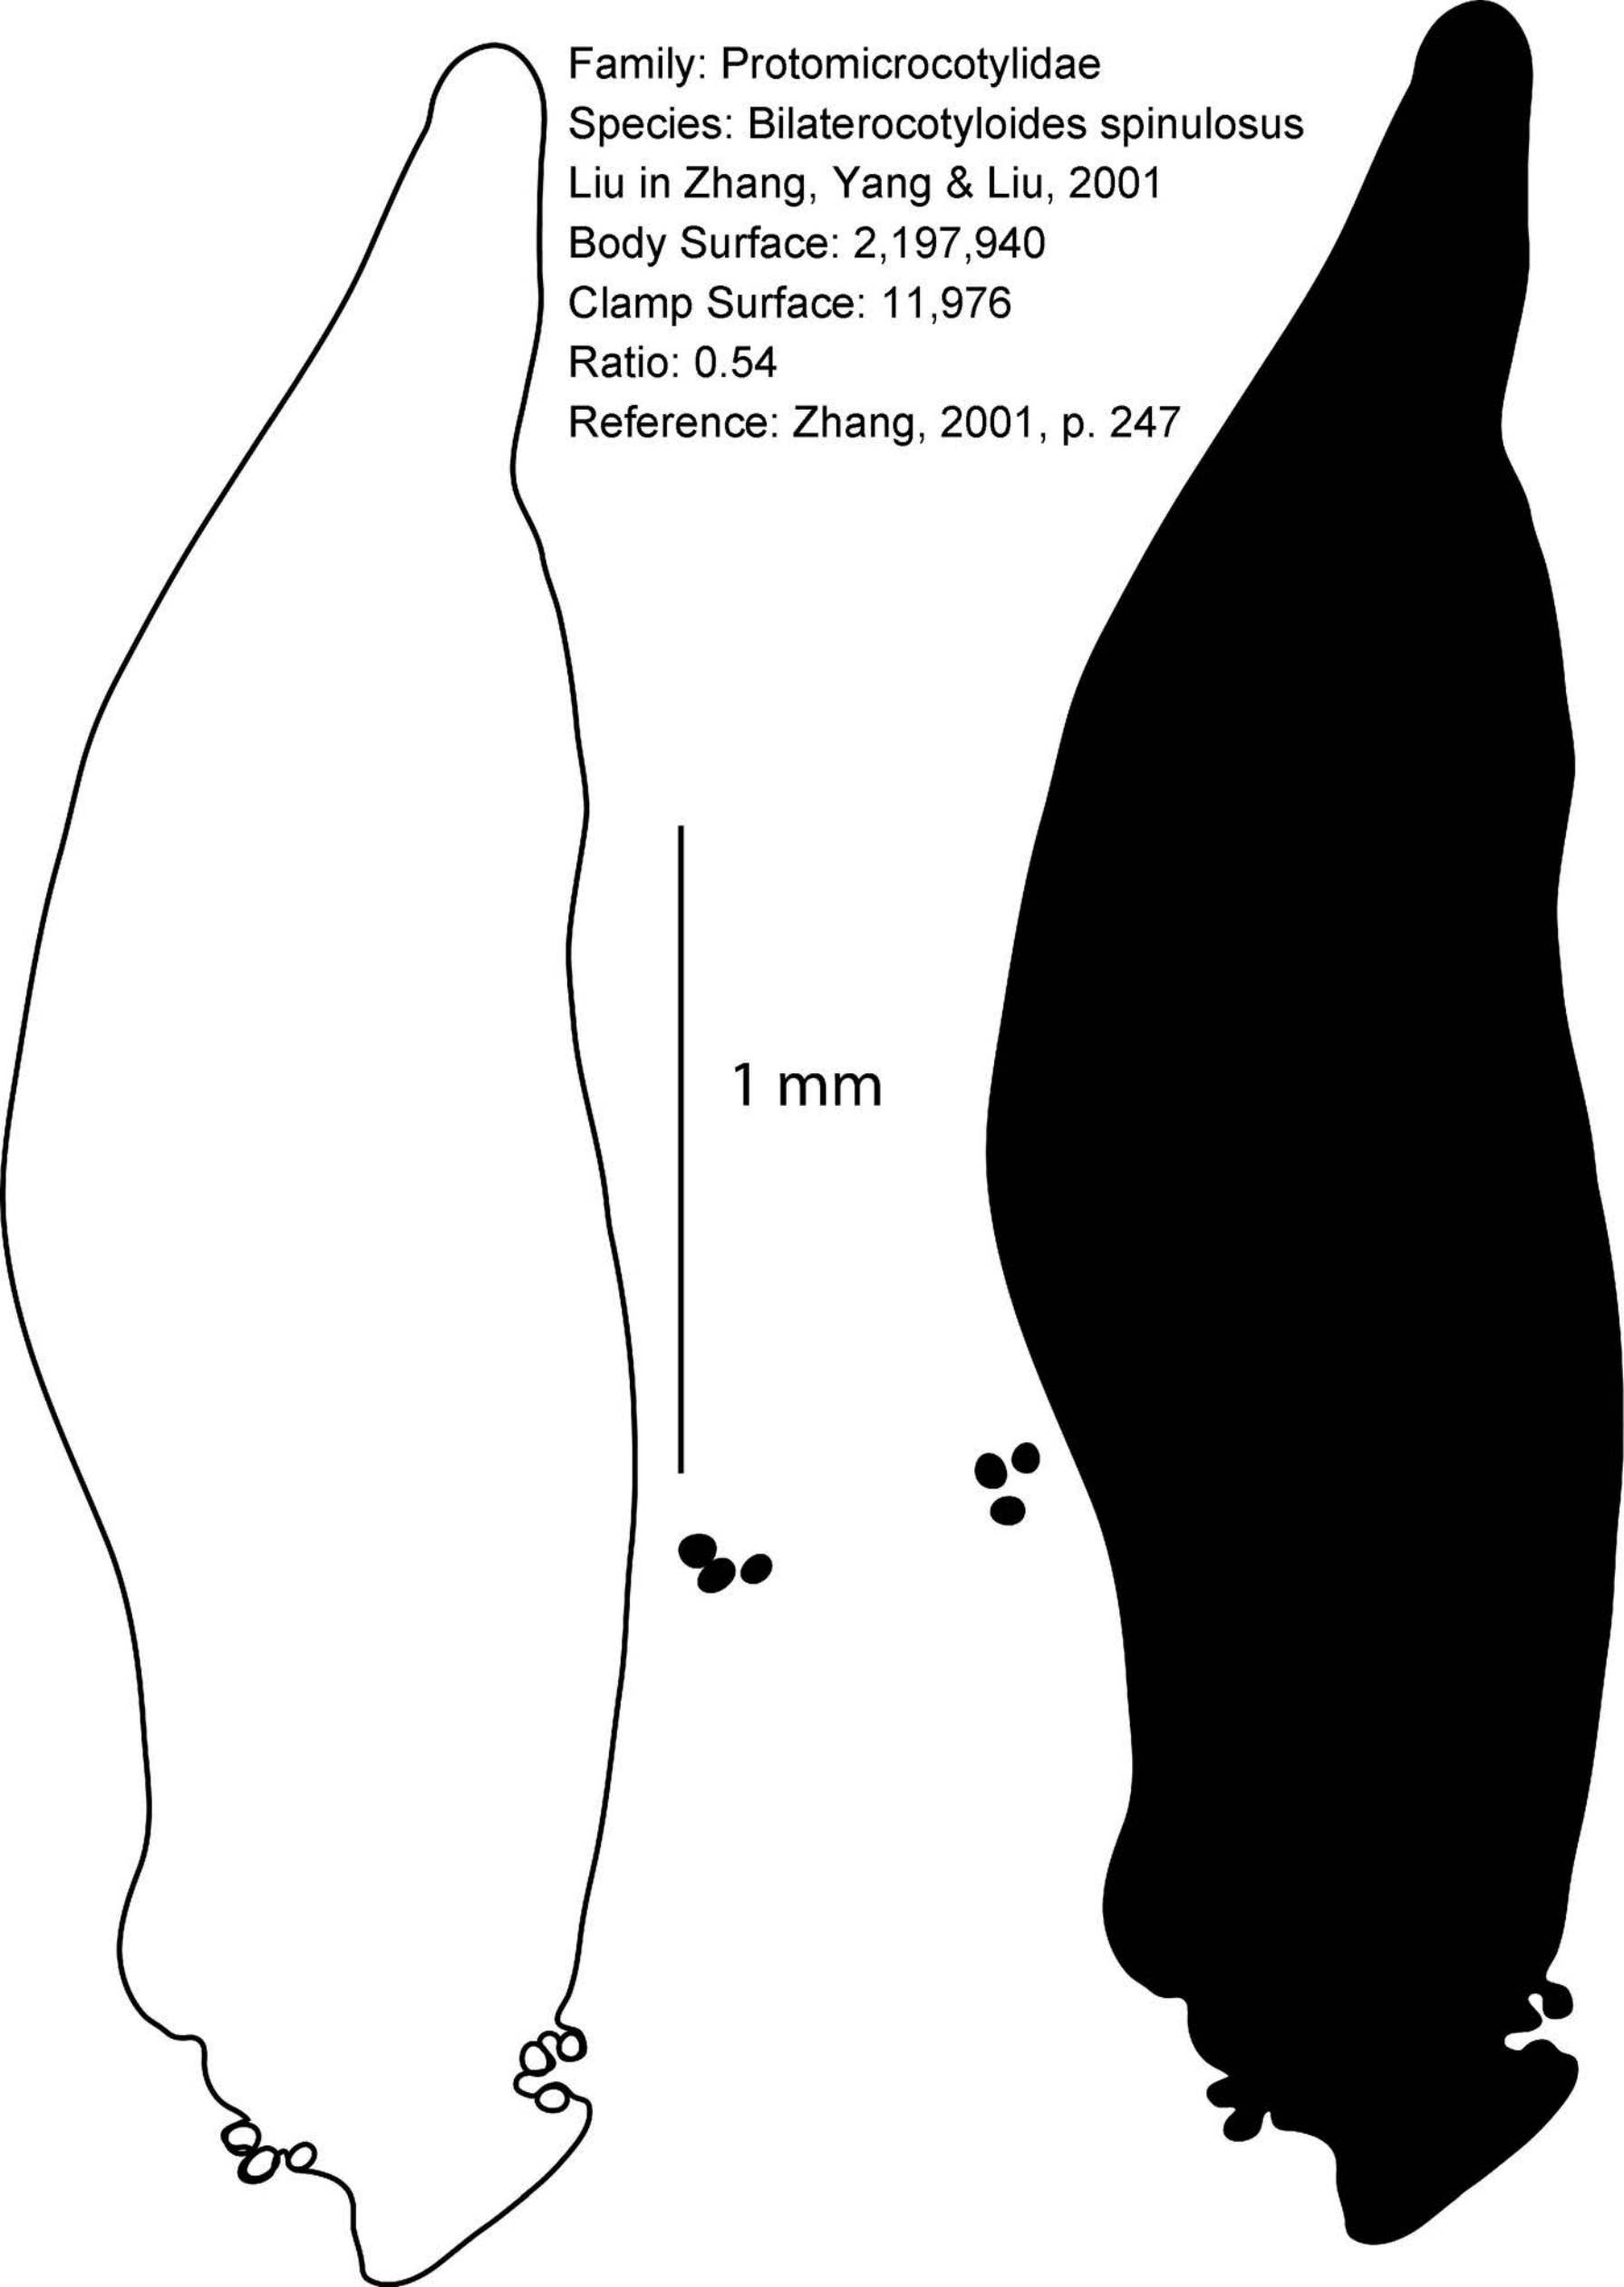

Family: Protomicrocotylidae

Species: Chauhanocotyle rottleri

Khoche & Dad, 1975

Body Surface: 912,981

Clamp Surface: 13,257

Ratio: 1.45

Reference: Pandey, 2008, p. 356

0.5 mm

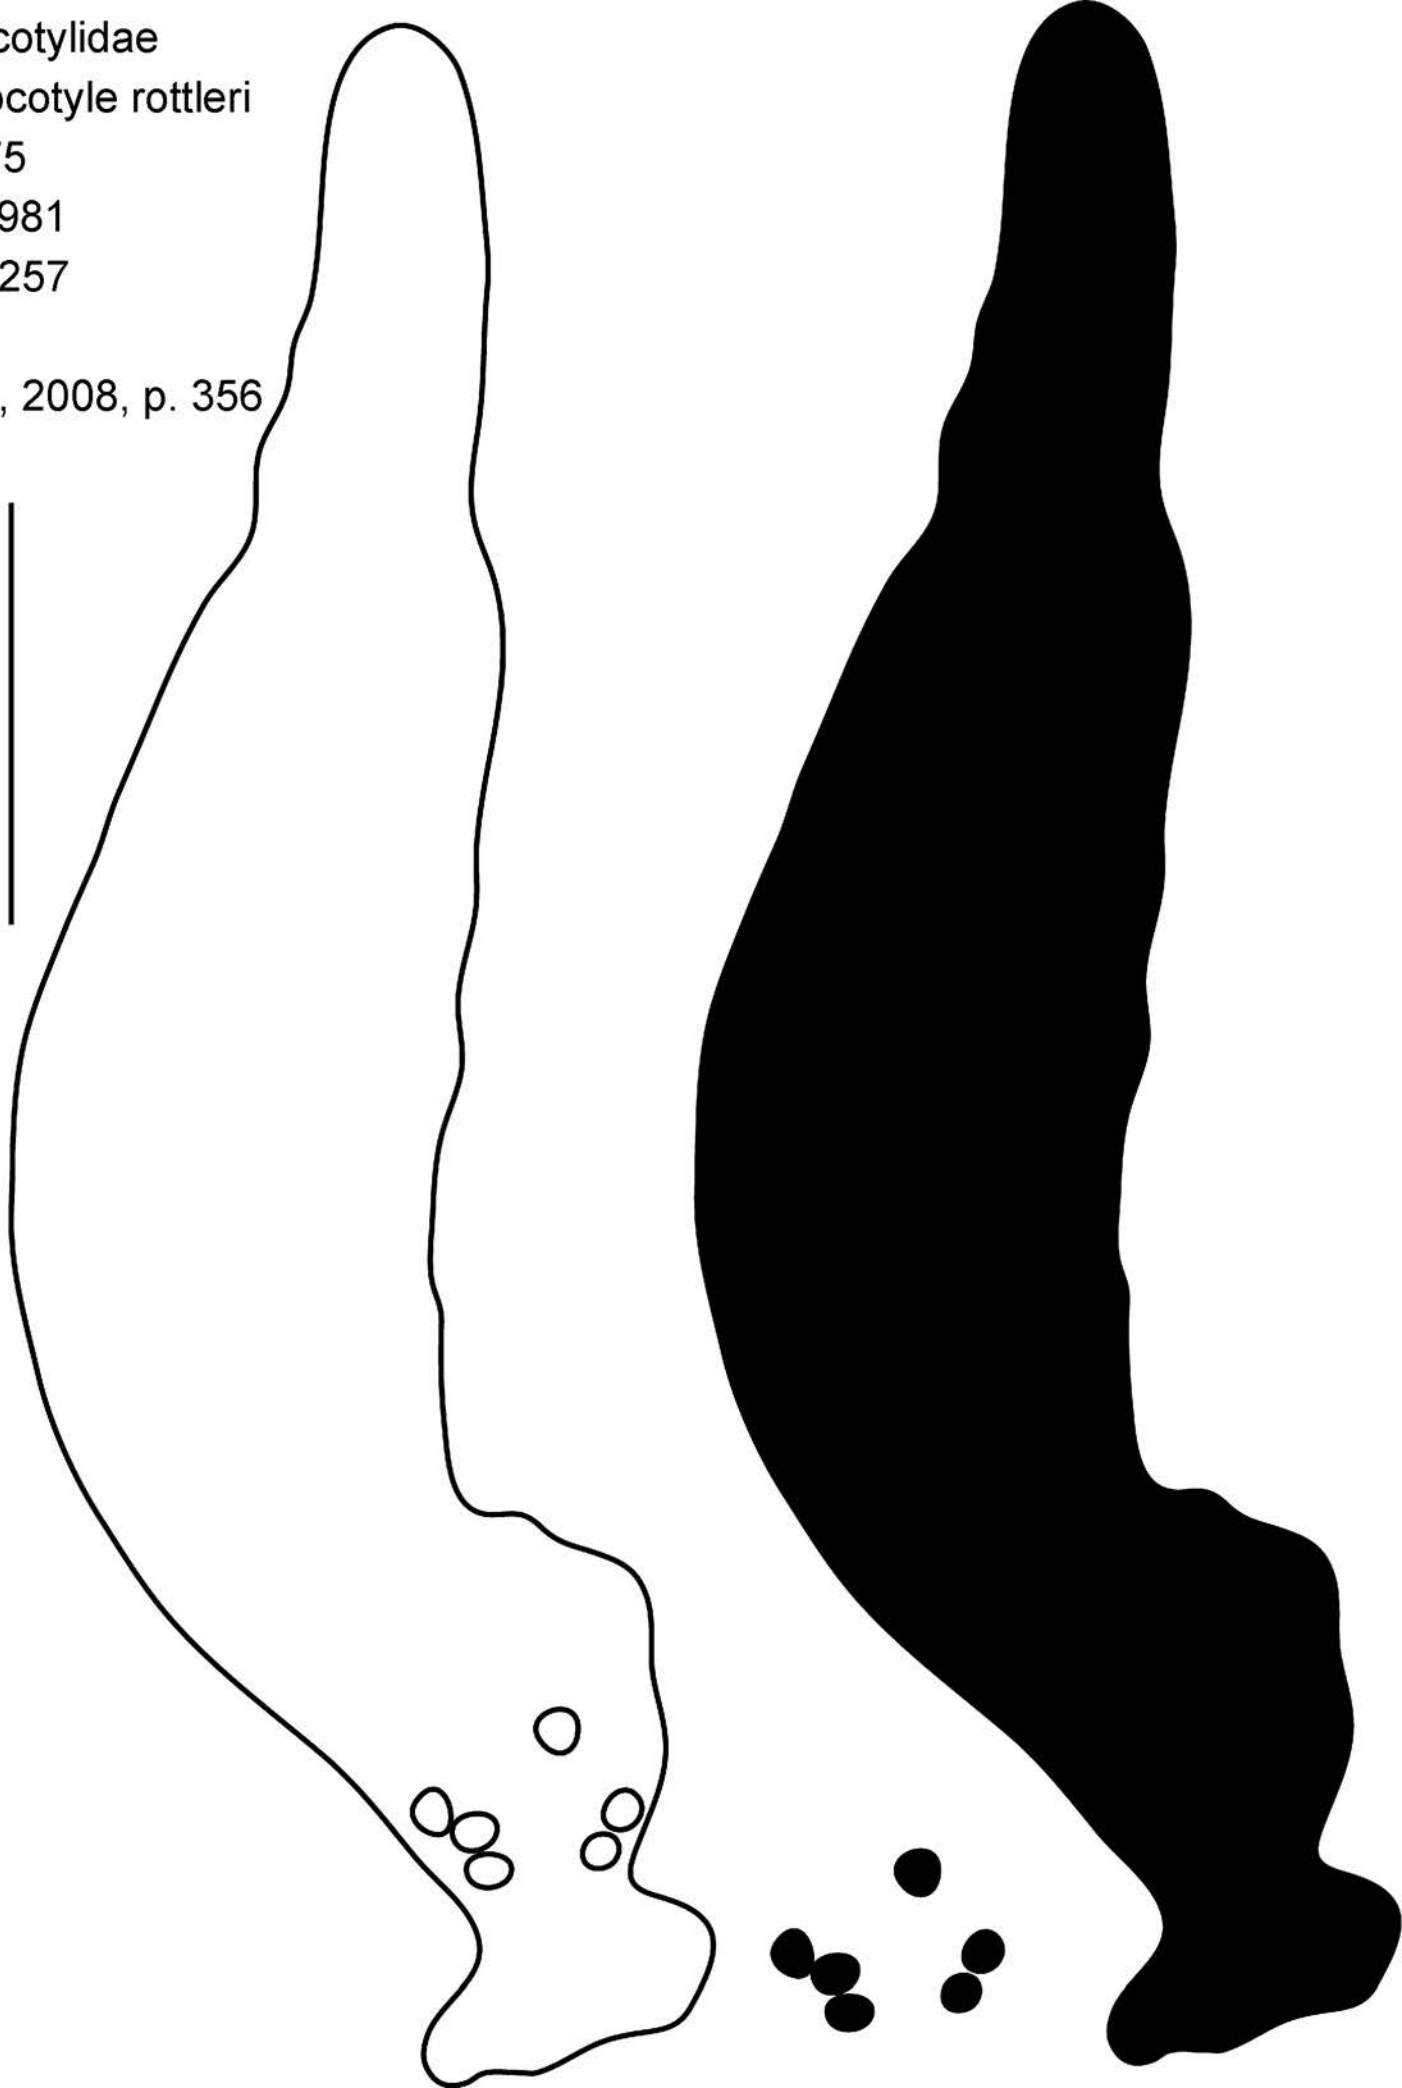

Family: Protomicrocotylidae

Species: *Lethacotyle fijiensis* Manter & Price, 1953

Body Surface: 2,788,607

Clamp Surface: 0

Ratio: 0

Reference: Lebedev, 1986, p. 117

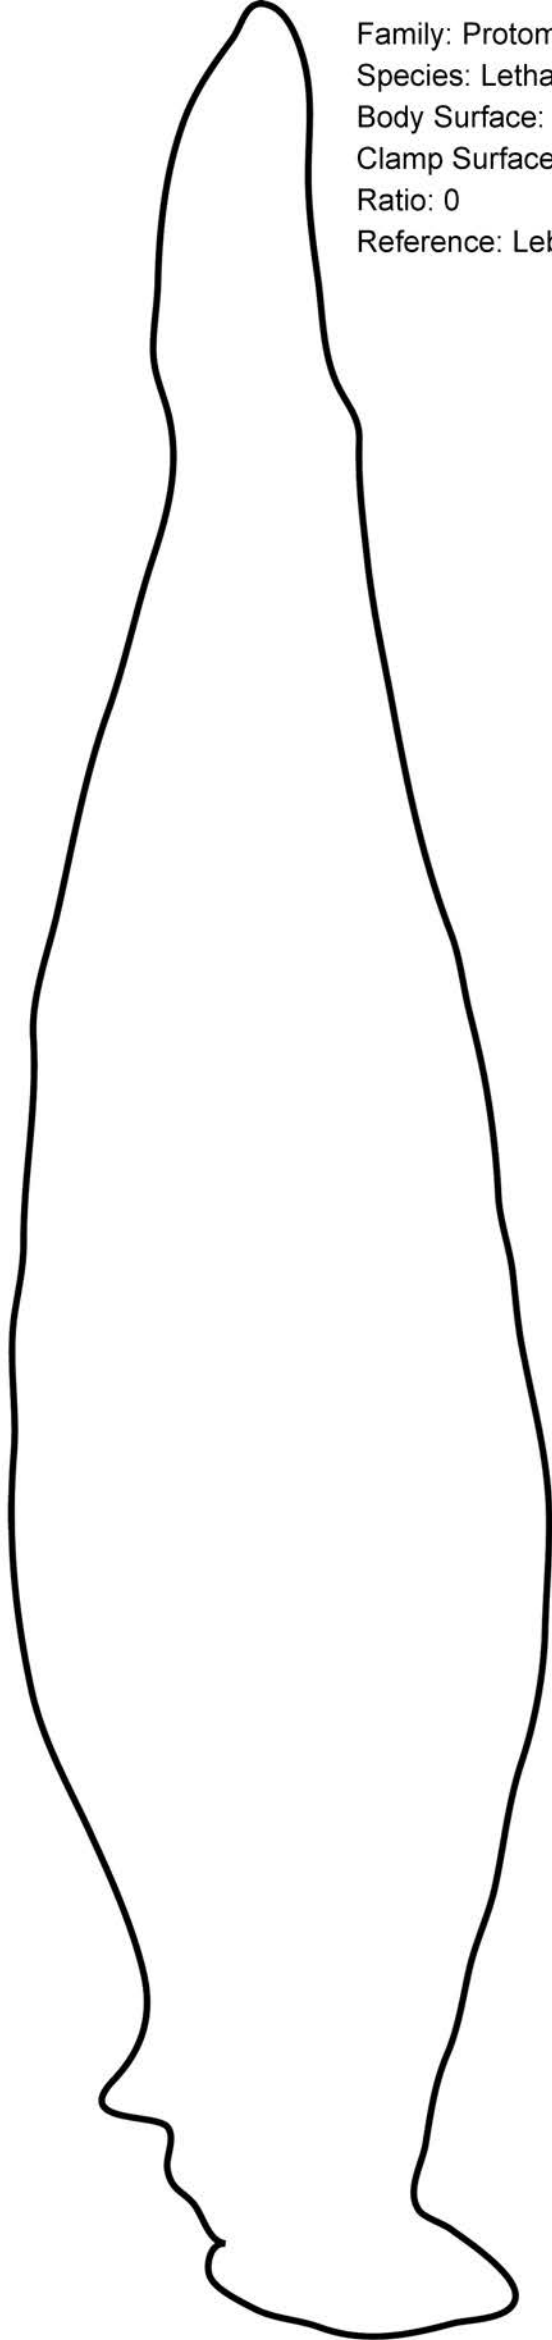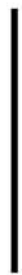

0.5 mm

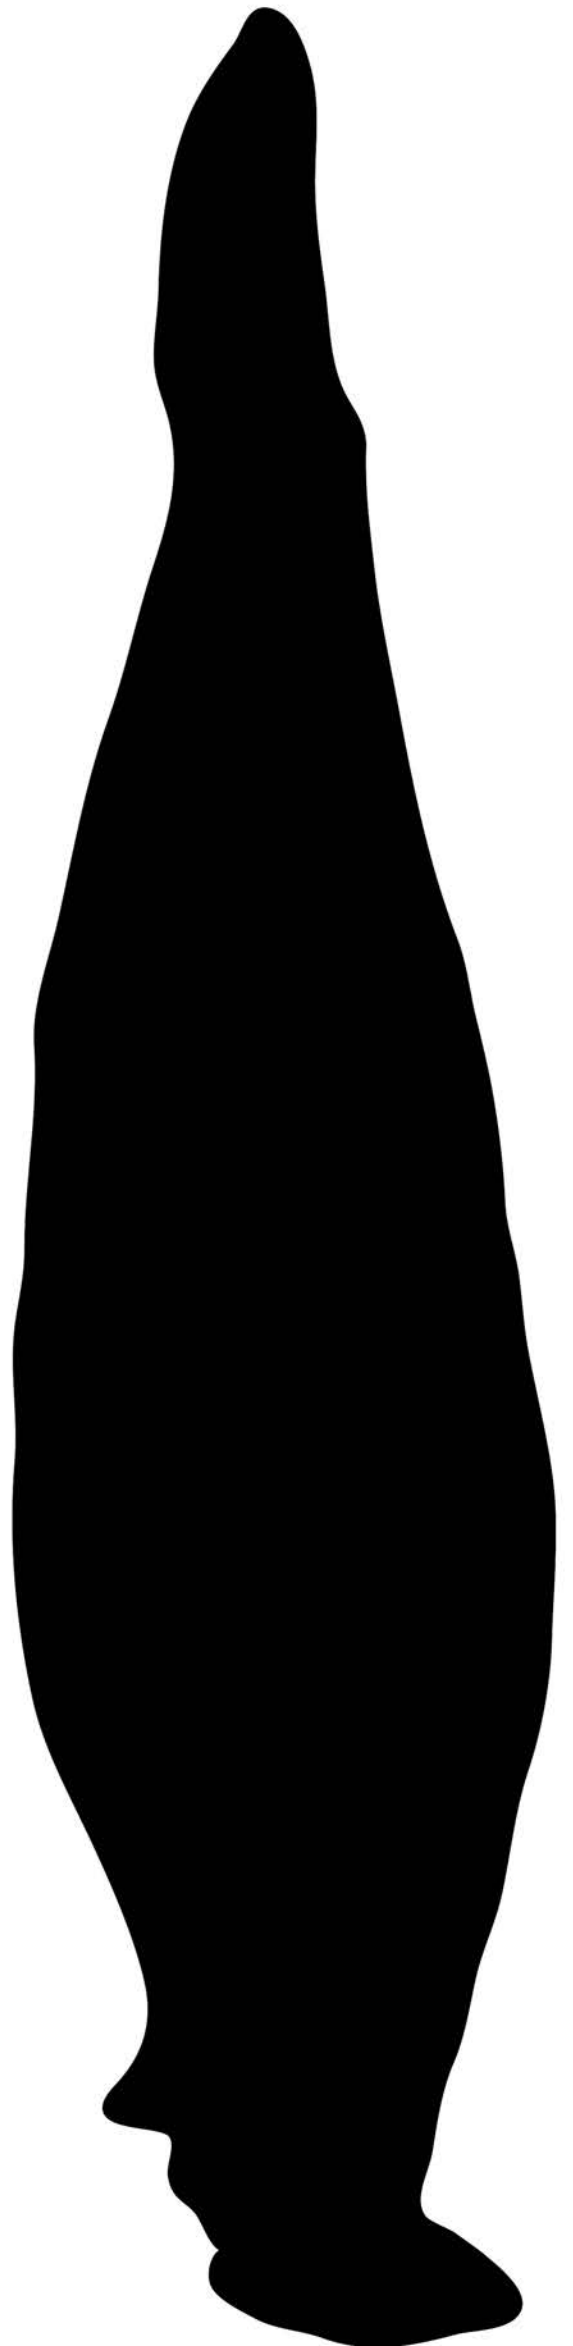

Family: Protomicrocotylidae  
Species: Lethacotyle new species JNC3209A1  
Body Surface: 2,562,639  
Clamp Surface: 0  
Ratio: 0

0.5 mm

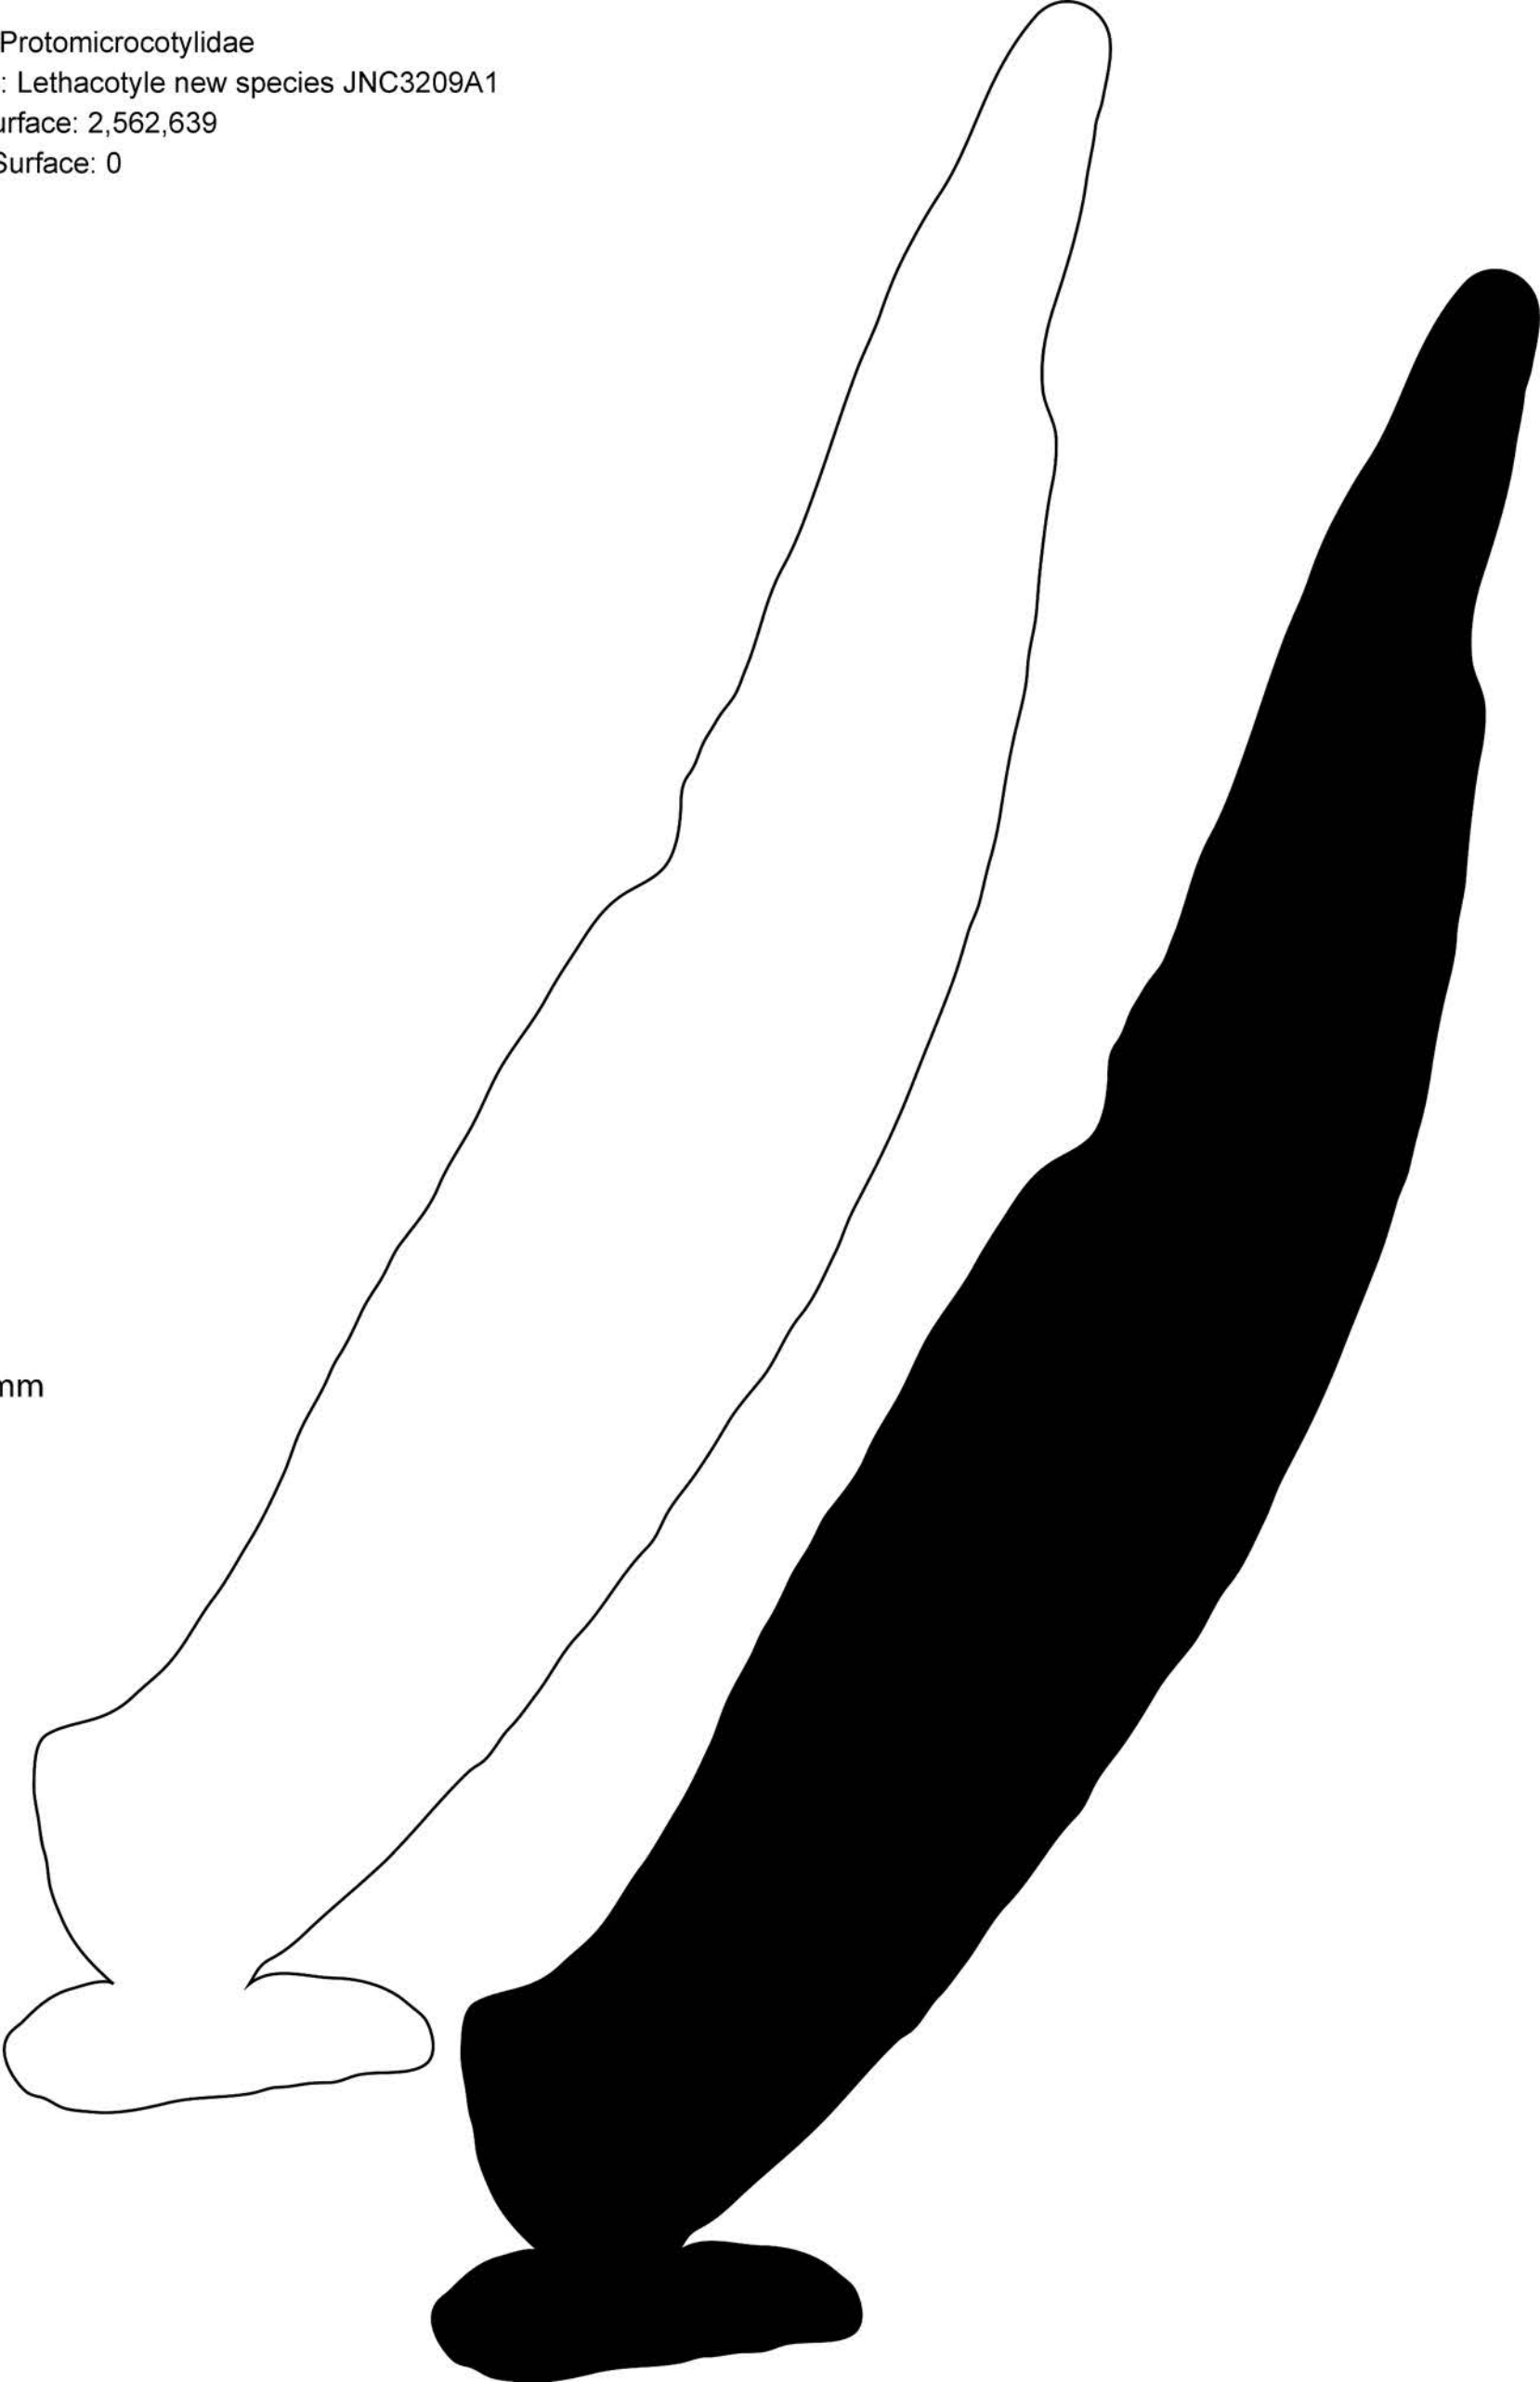

Family: Protomicrocotylidae

Species: *Neomicrocotyle carangis* Yamaguti, 1968

Body Surface: 4,287,184

Clamp Surface: 15,571

Ratio: 0.36

Reference: Lebedev, 1986, p. 110

1 mm

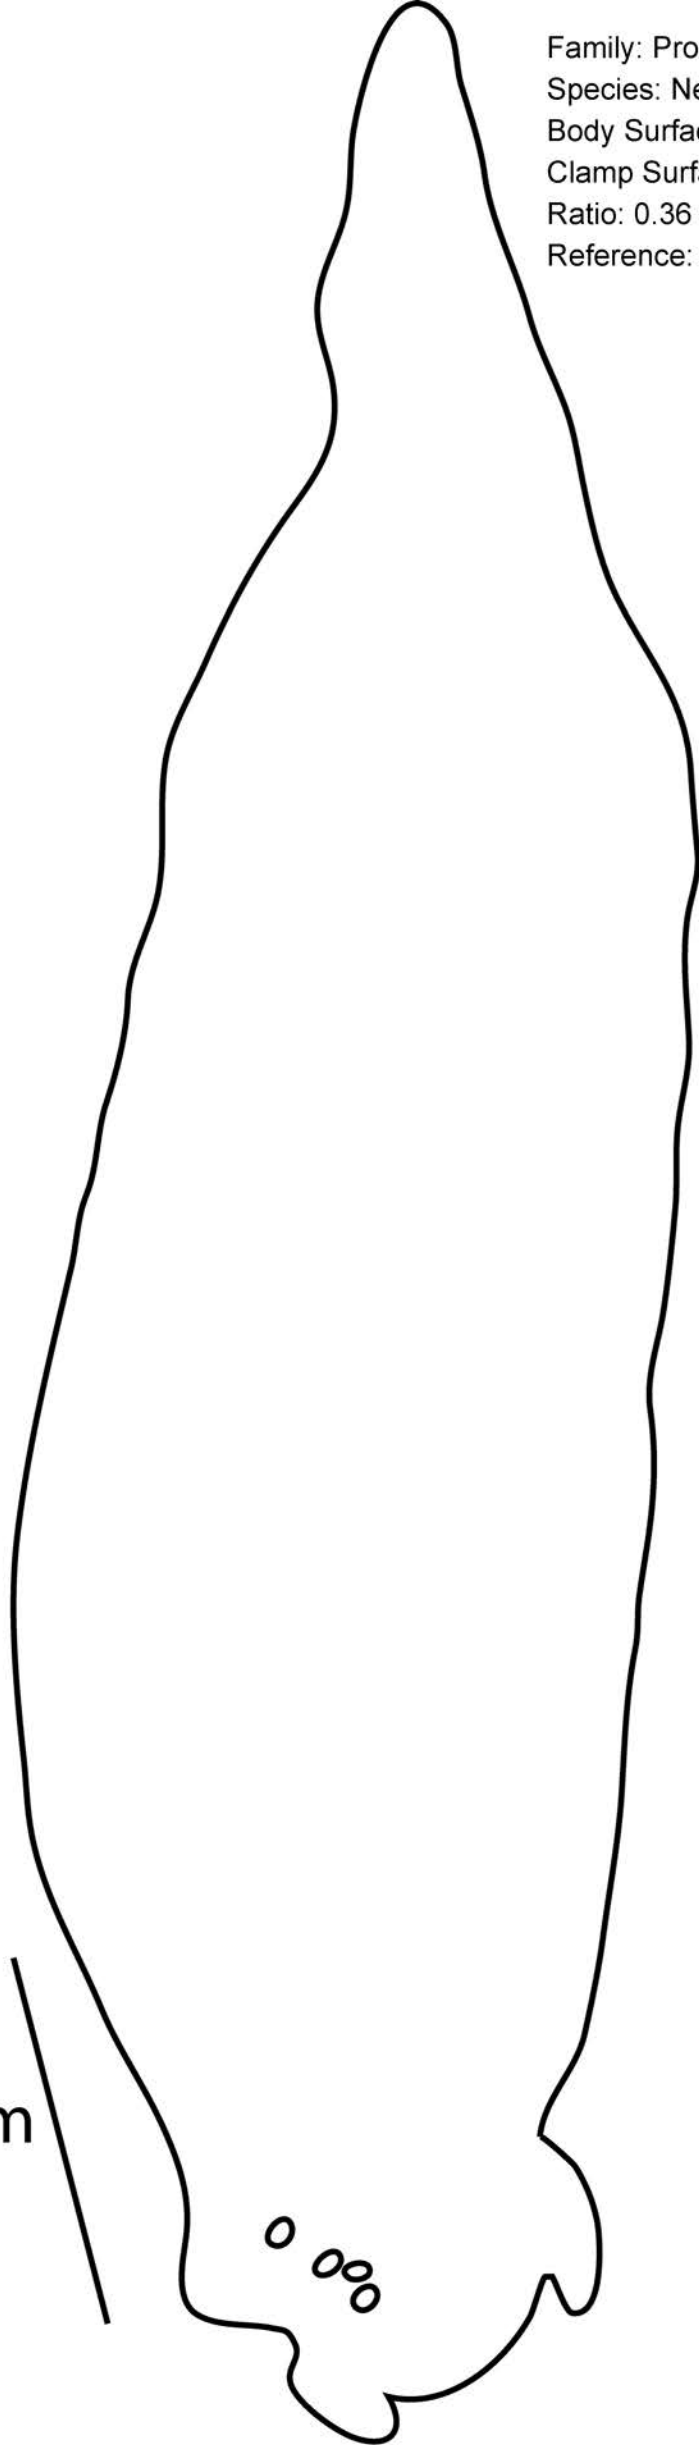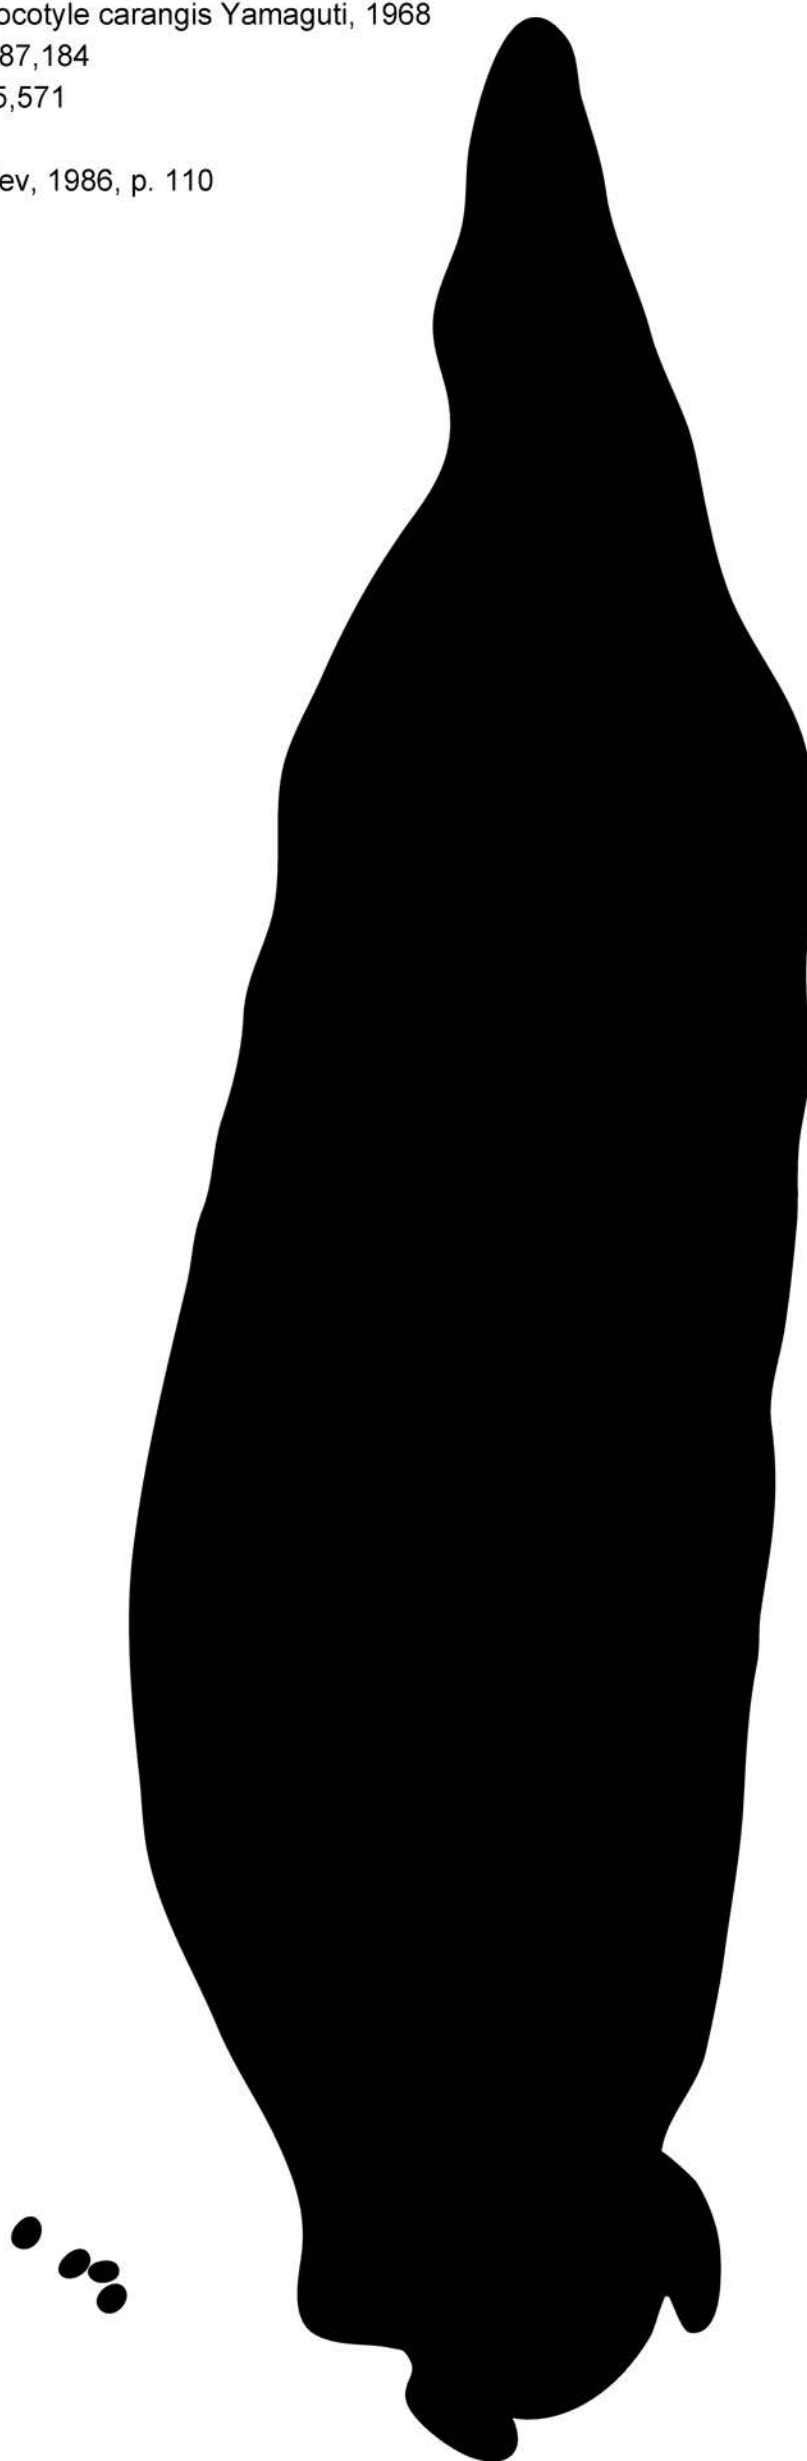

Family: Protomicrocotylidae

Species: *Neomicrocotyle indica* Ramalingam, 1960

Body Surface: 49,651

Clamp Surface: 232

Ratio: 0.47

Reference: Ramalingam, 1960, p. 375

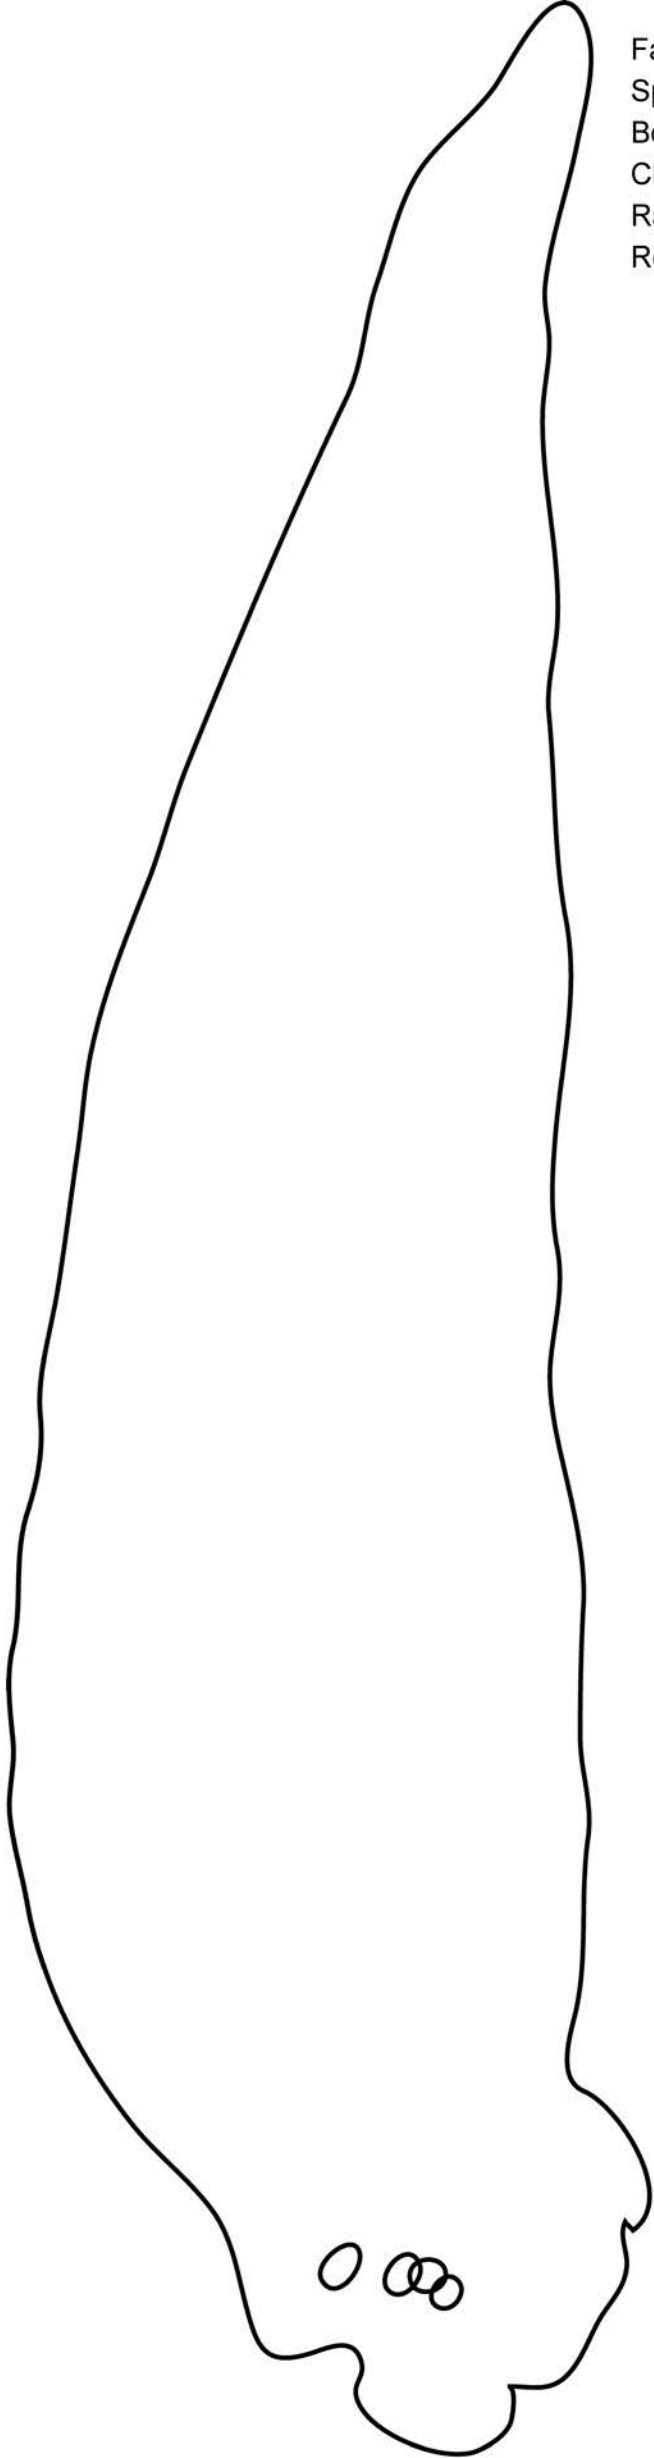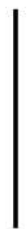

0.05 mm

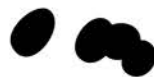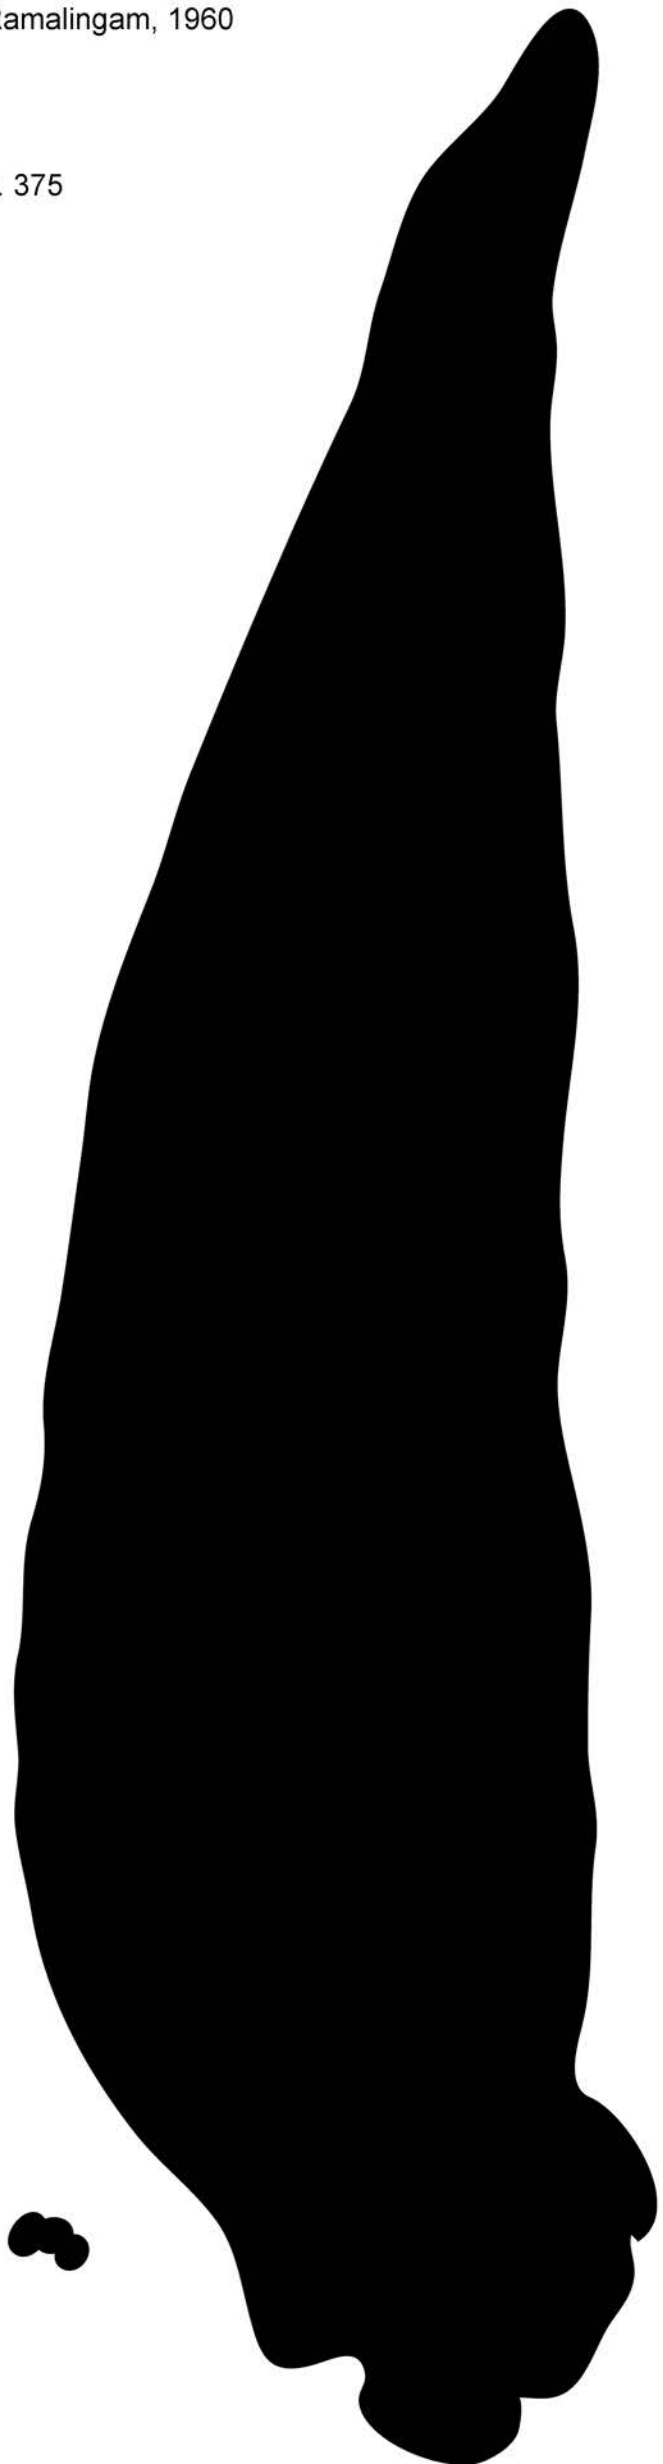

Family: Protomicrocotylidae  
Species: Neomicrocotyle sp. JNC 3242A7  
Body Surface: 2,663,686  
Clamp Surface: 15,327  
Ratio: 0.58

0.5 mm

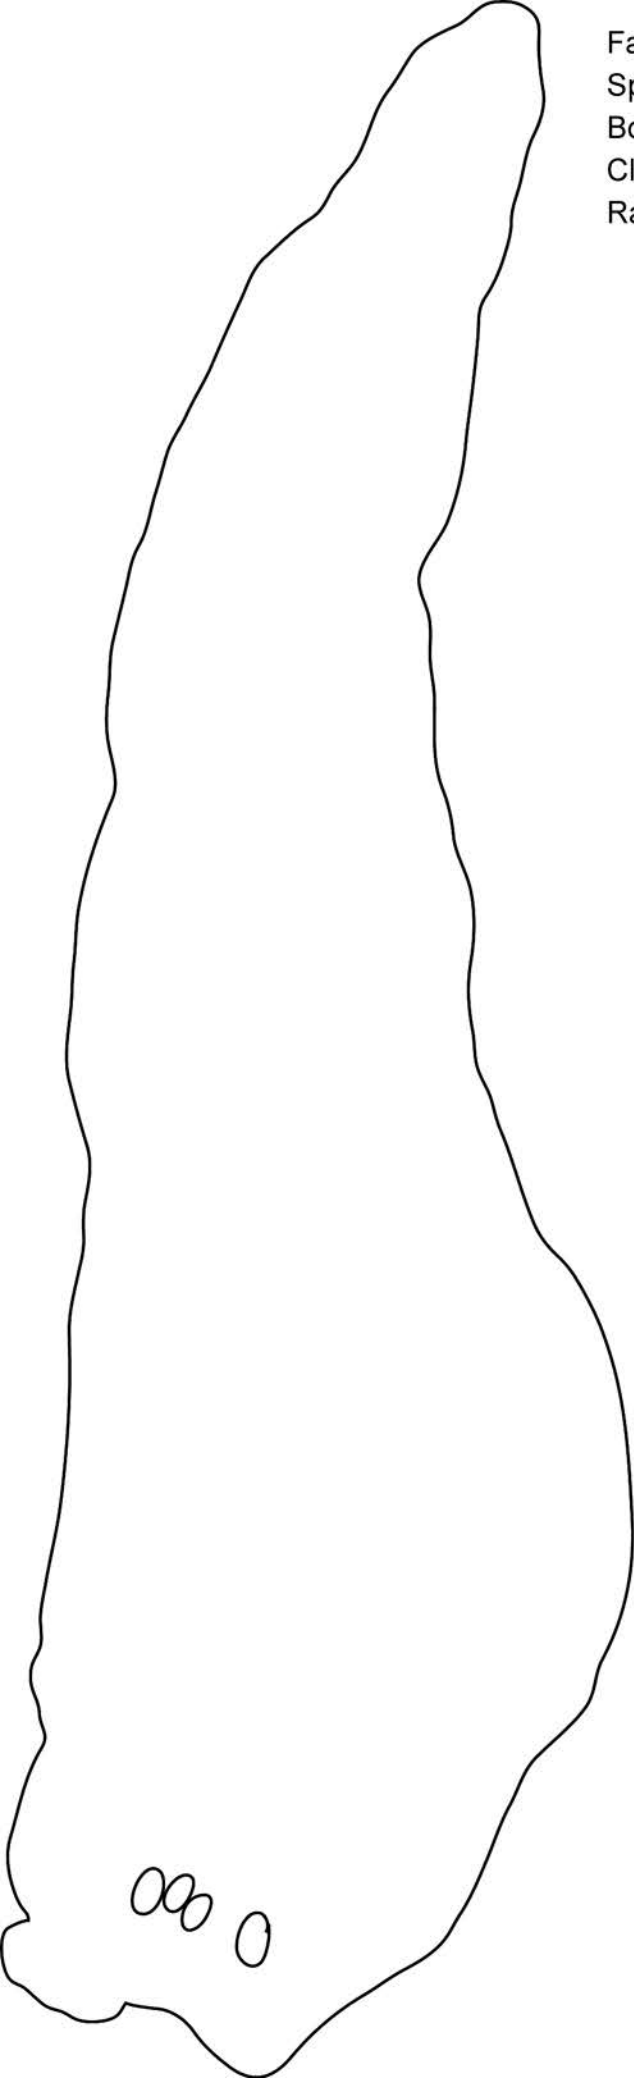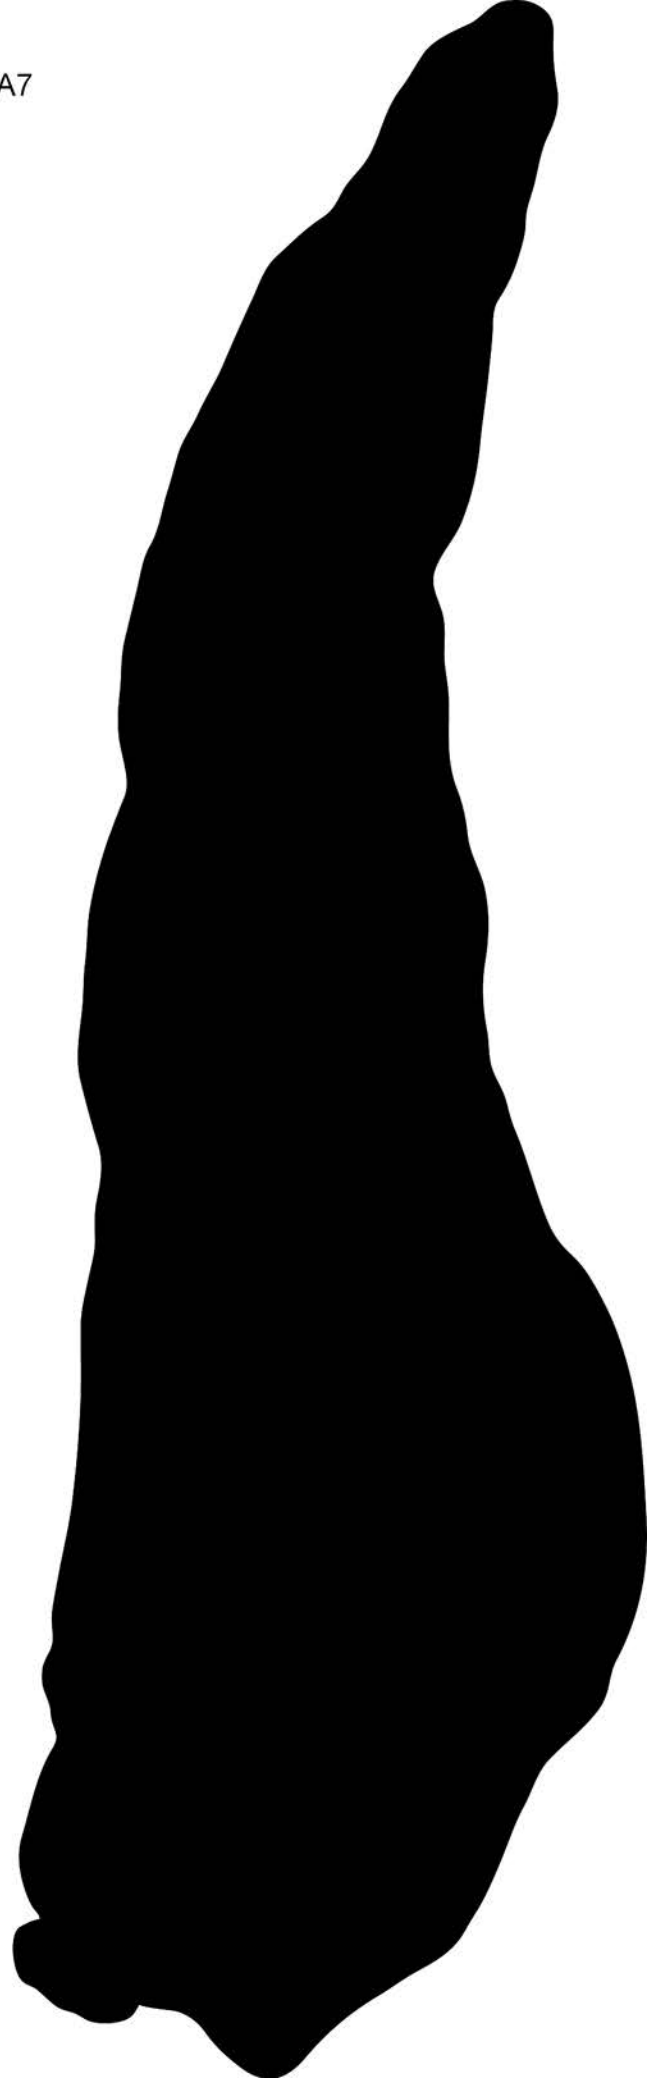

Family: Protomicrocotylidae

Species: Neomicrocotyle unnithani Yamaguti, 1968

Body Surface: 2,019,641

Clamp Surface: 13,440

Ratio: 0.67

Reference: Unnithan, 1962, p. 344

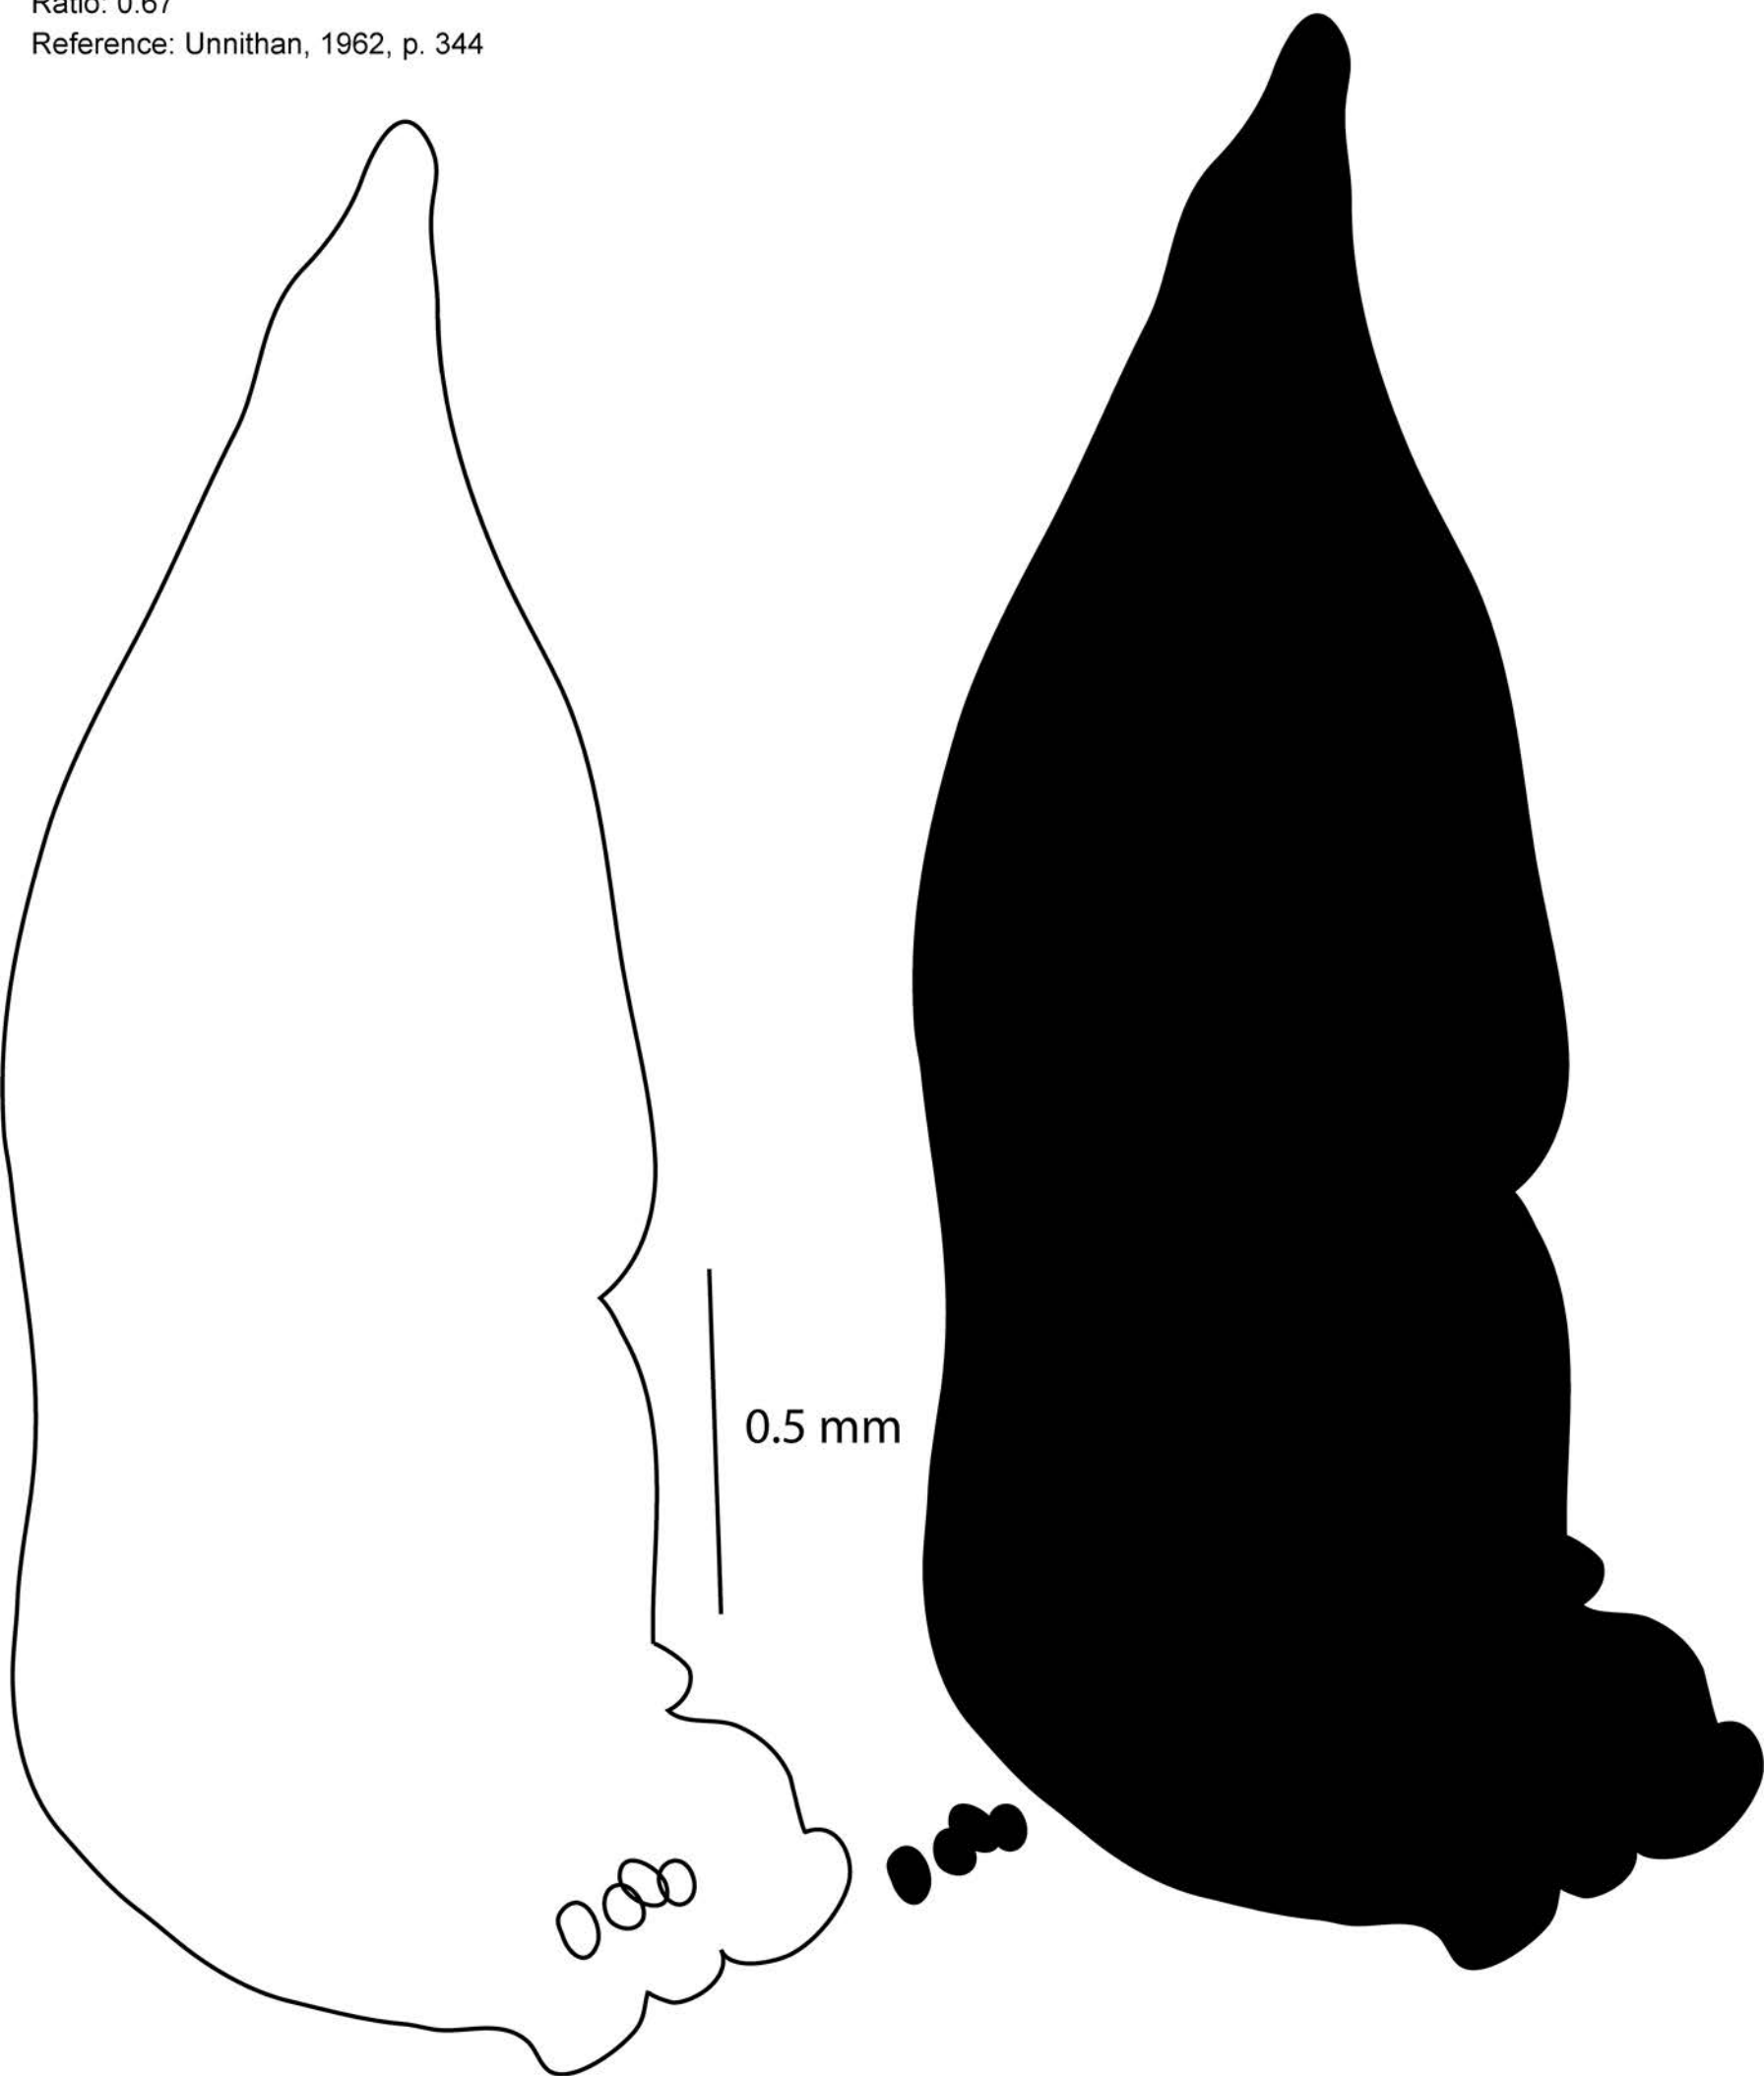



Family: Protomicrocotylidae  
Species: Protomicrocotyle celebesensis Yamaguti, 1953  
Body Surface: 1,791,383  
Clamp Surface: 11,869  
Ratio: 0.66  
Reference: Yamaguti, 1953, p. 56

0.5 mm

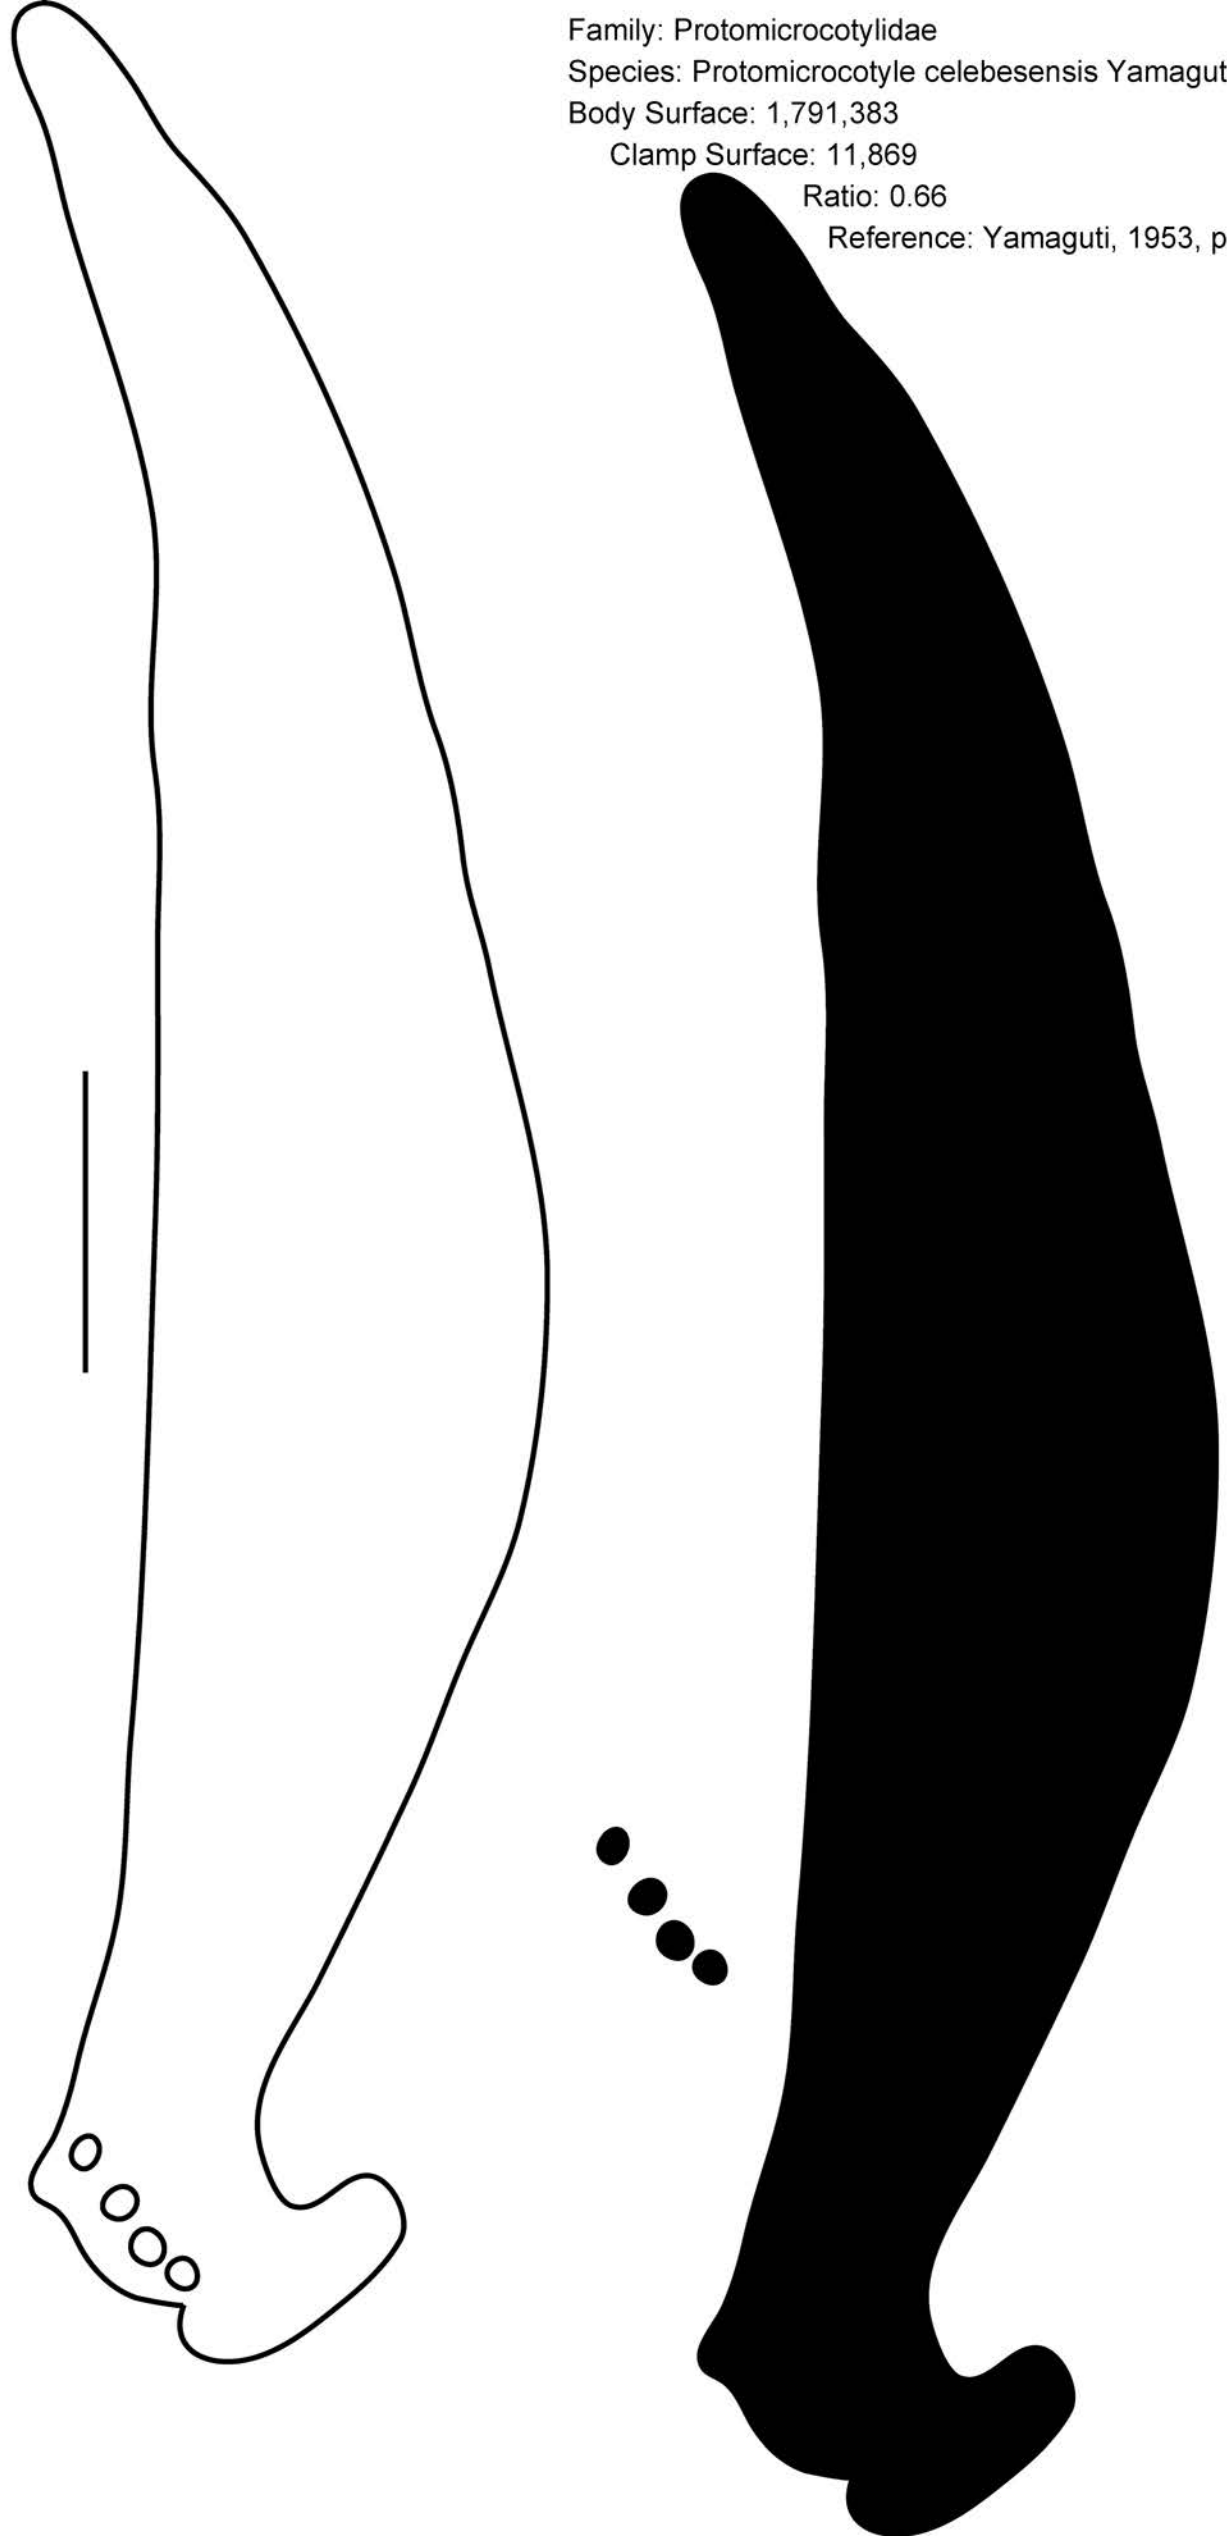

Family: Protomicrocotylidae

Species: *Protomicrocotyle ivoriensis* Wahl, 1972

Body Surface: 2,939,959 ; Clamp Surface: 7,682

Ratio: 0.26

Reference: Wahl, 1972, p. 324

0.5 mm

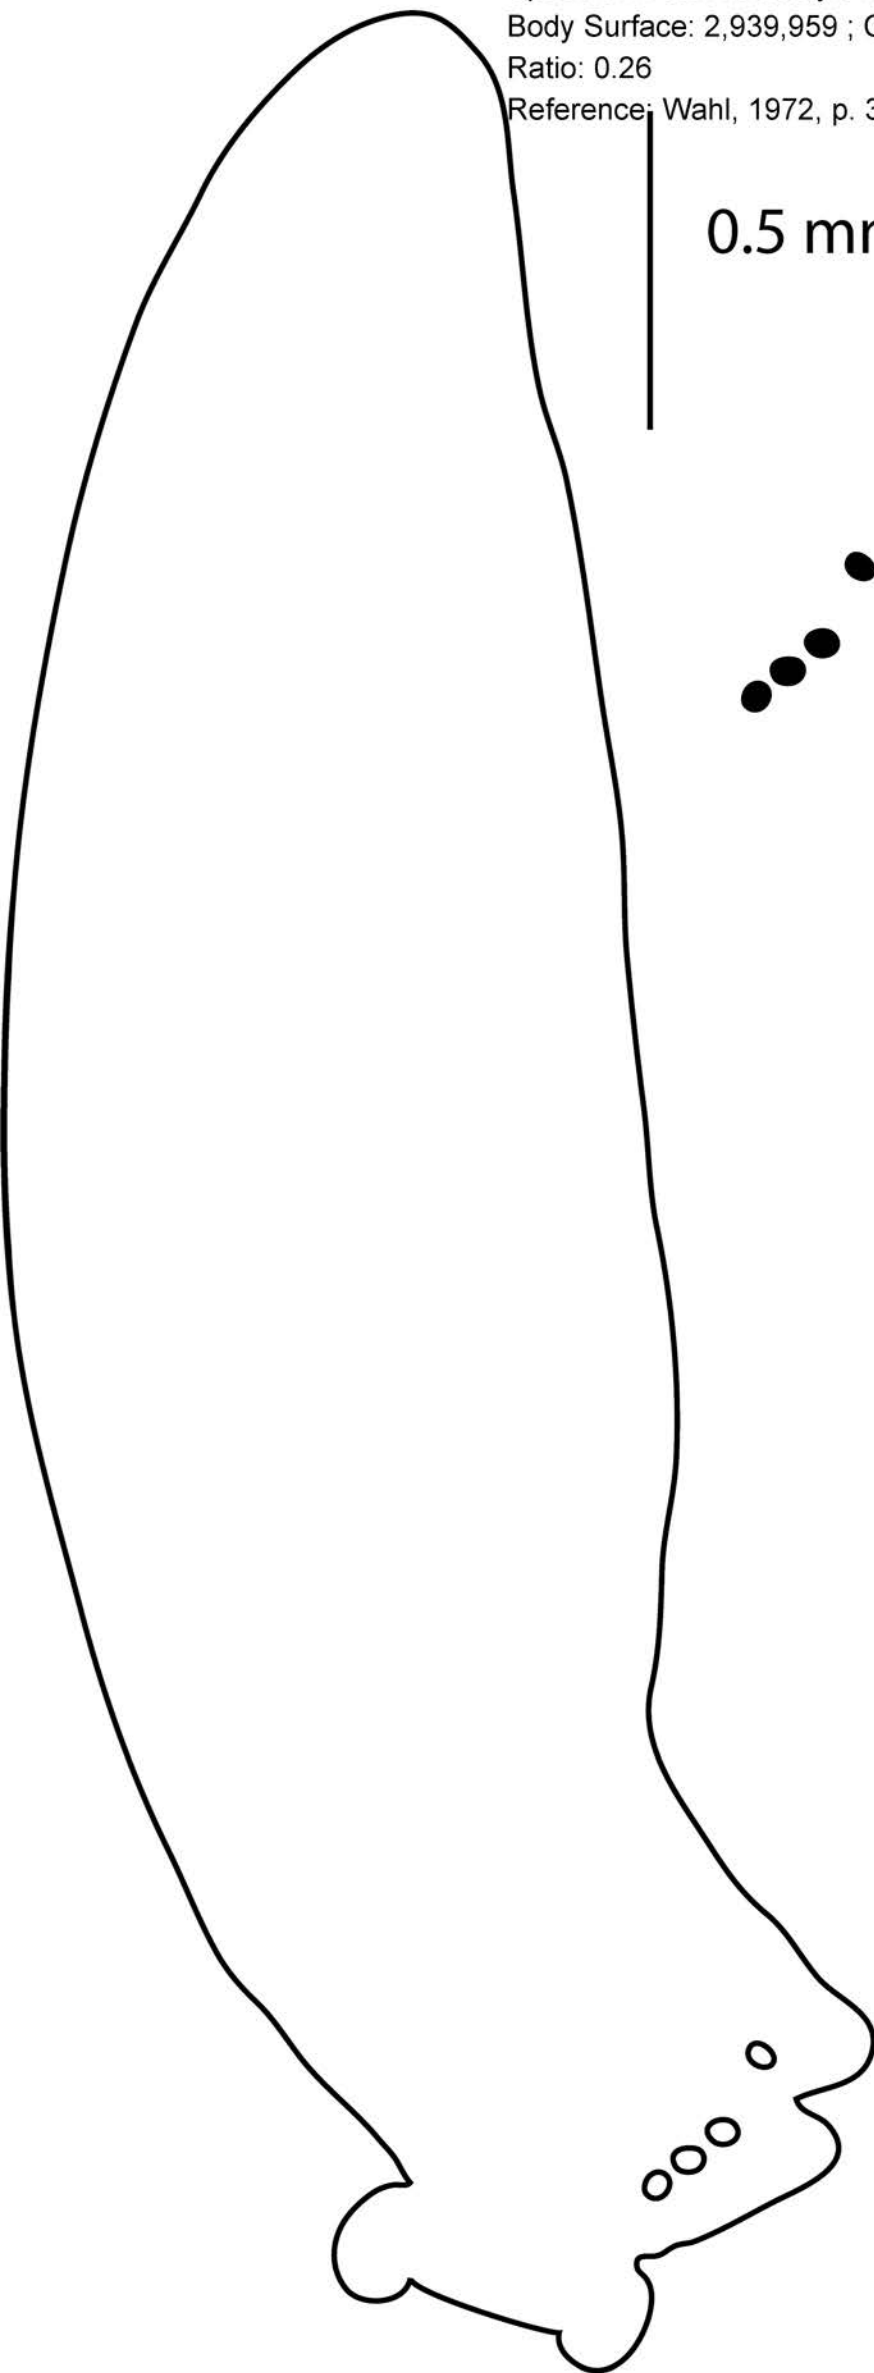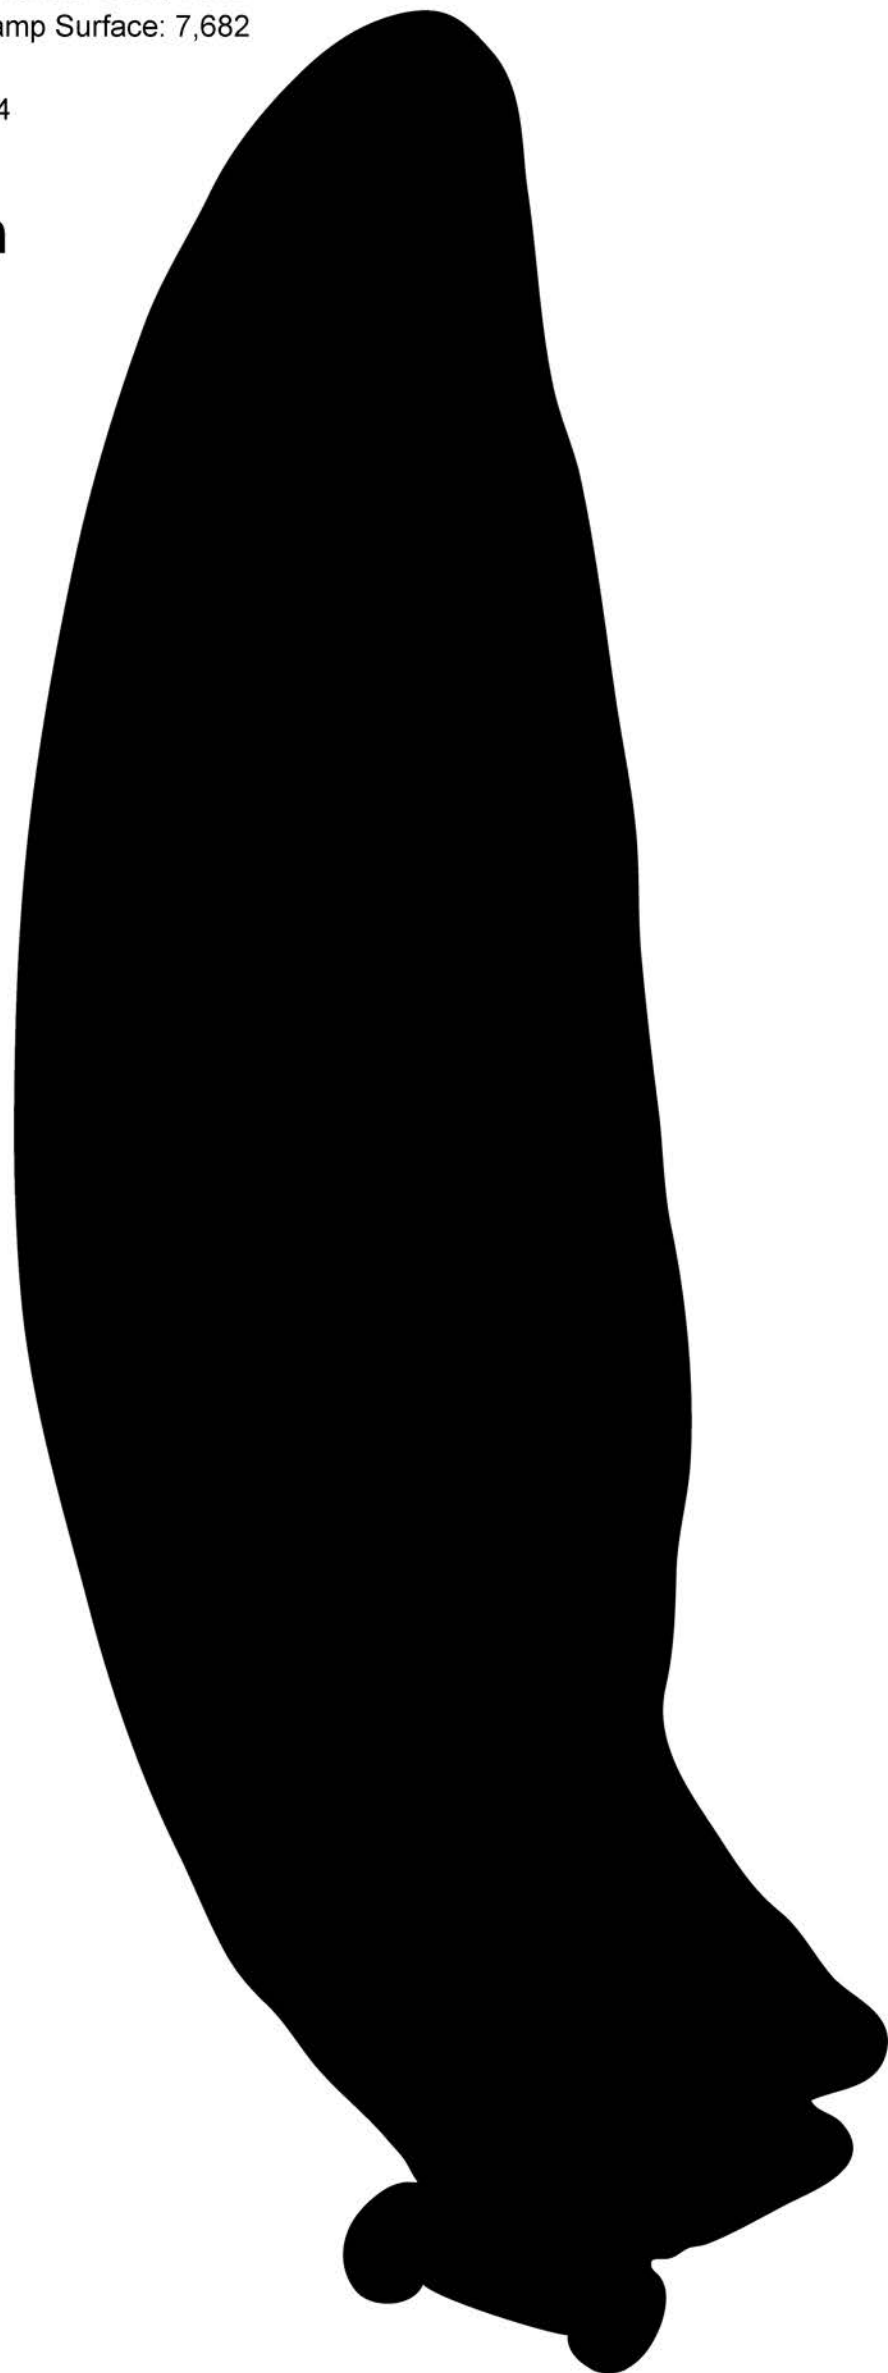

Family: Protomicrocotylidae

Species: *Protomicrocotyle madrasensis*

Ramalingam, 1960

Body Surface: 736,440

Clamp Surface: 5,113

Ratio: 0.69

Reference: Ramalingam, 1960, p. 375

0.25 mm

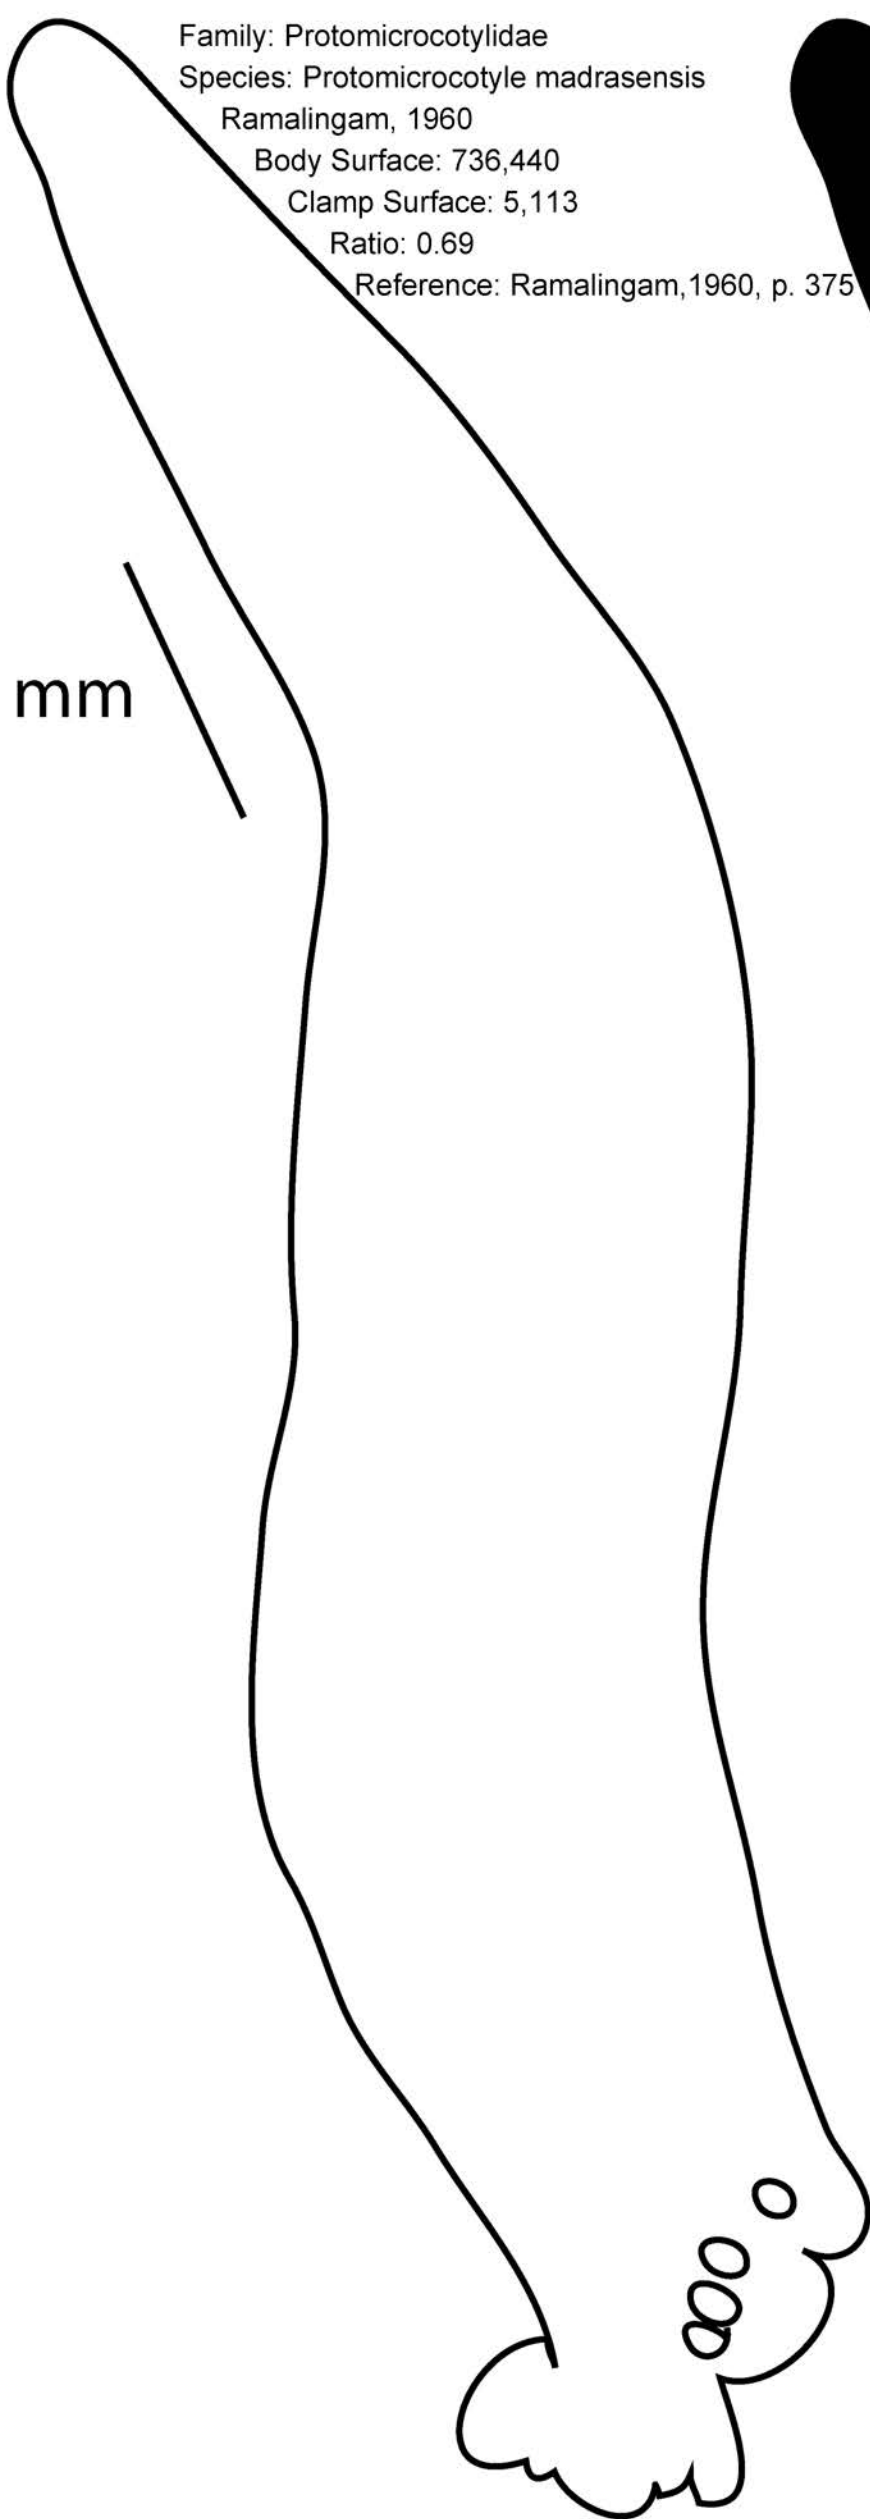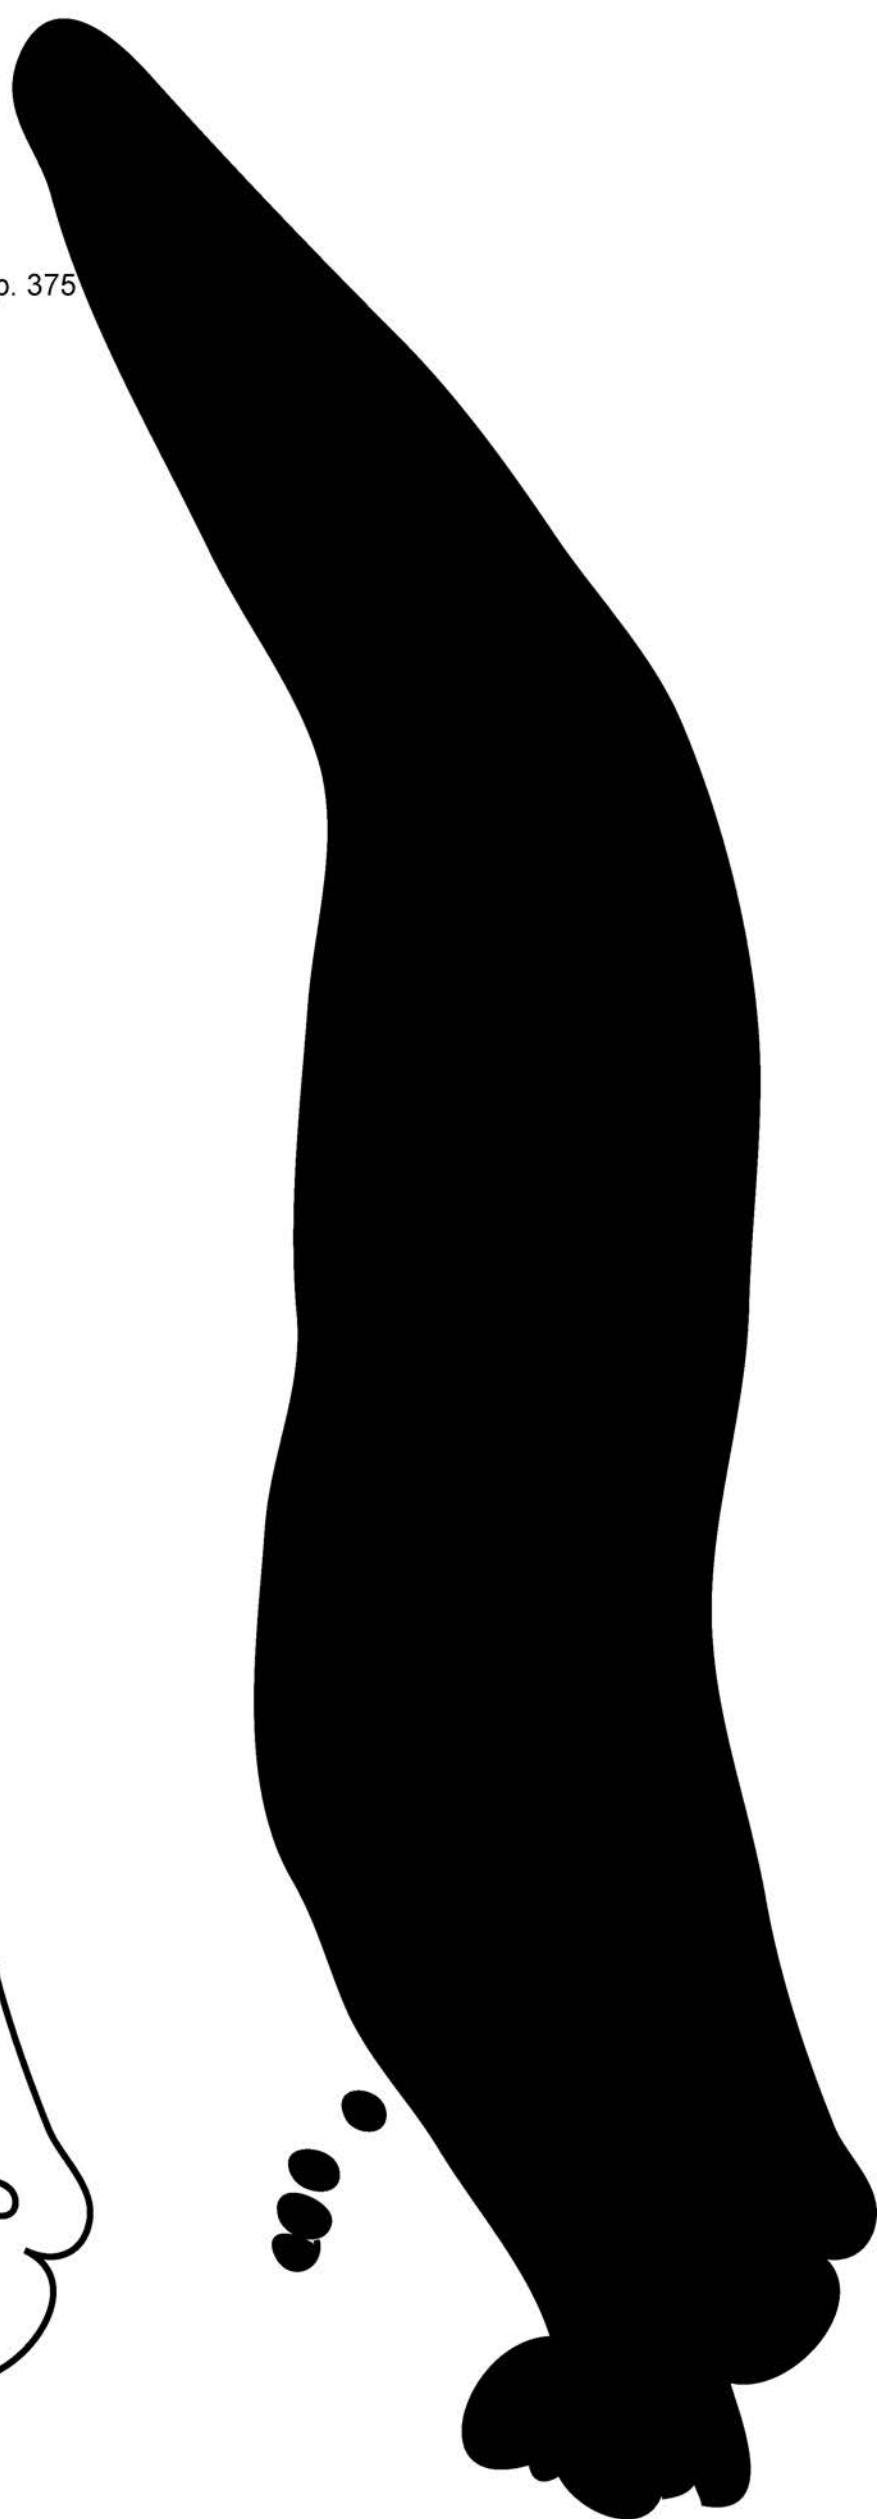

Family: Protomicrocotylidae  
Species: Protomicrocotyle mannarensis  
Ramalingam, 1960  
Body Surface: 1,934,754  
Clamp Surface: 10,205  
Ratio: 0.53  
Reference: Ramalingam, 1960, p. 377

0.5 mm

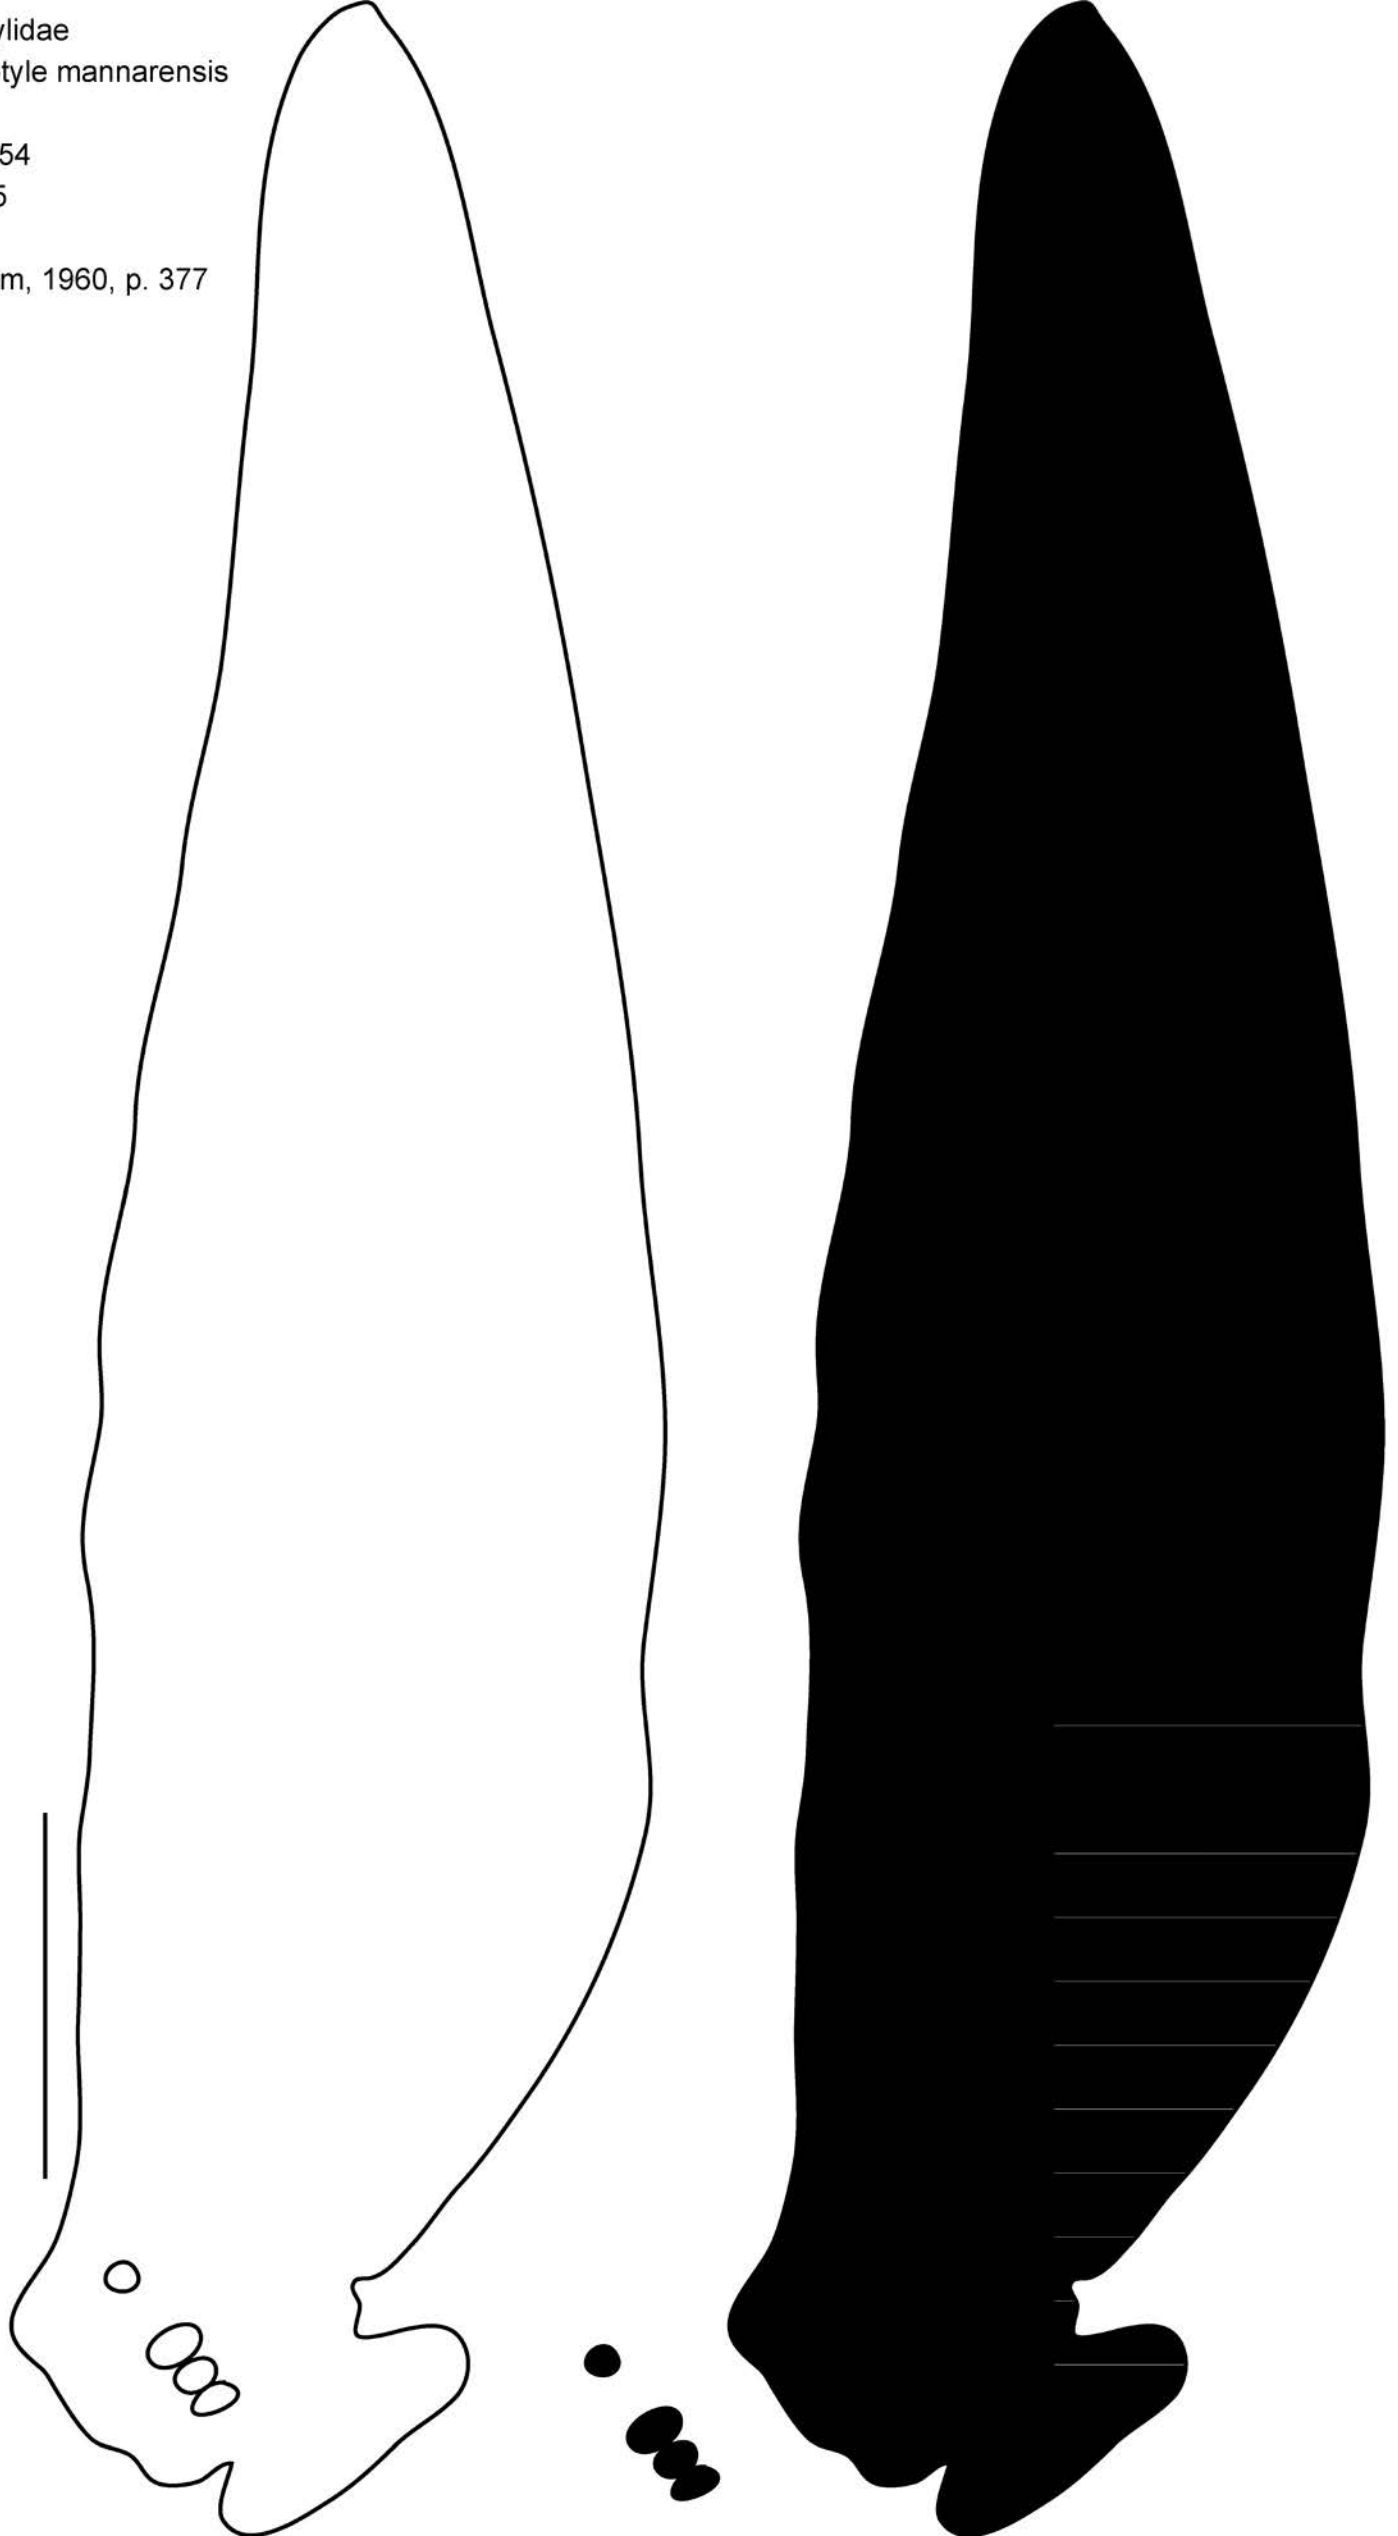

0.5 mm

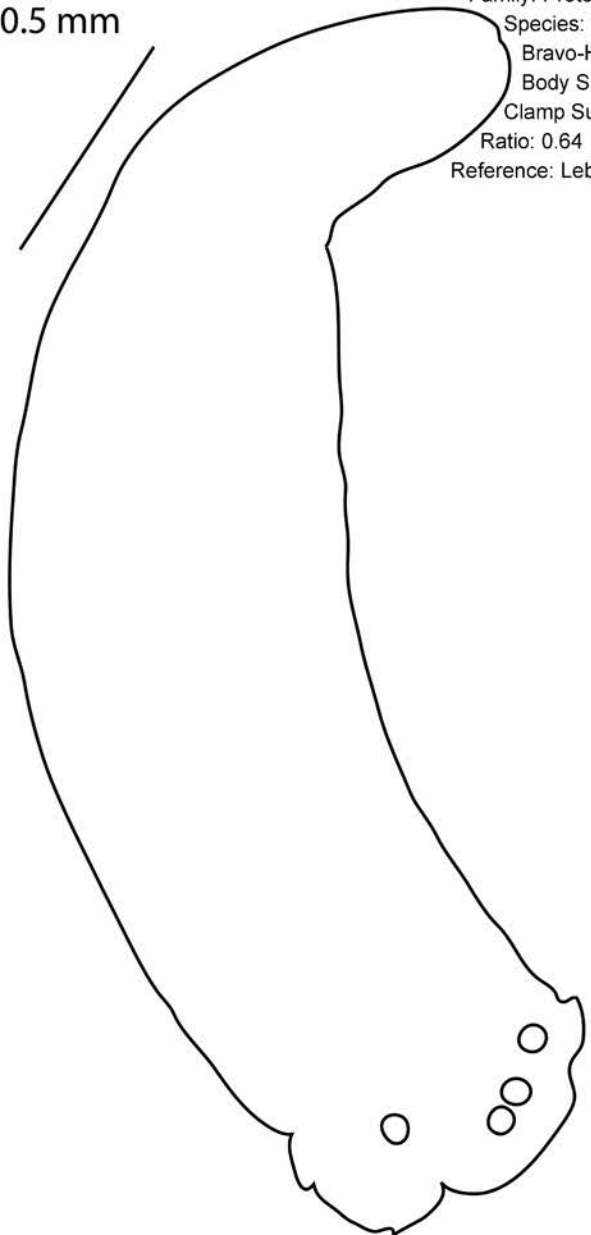

Family: Protomicrocotylidae  
Species: Protomicrocotyle manteri  
Bravo-Hollis, 1966  
Body Surface: 1,608,092  
Clamp Surface: 10,245  
Ratio: 0.64  
Reference: Lebedev, 1986, p. 106

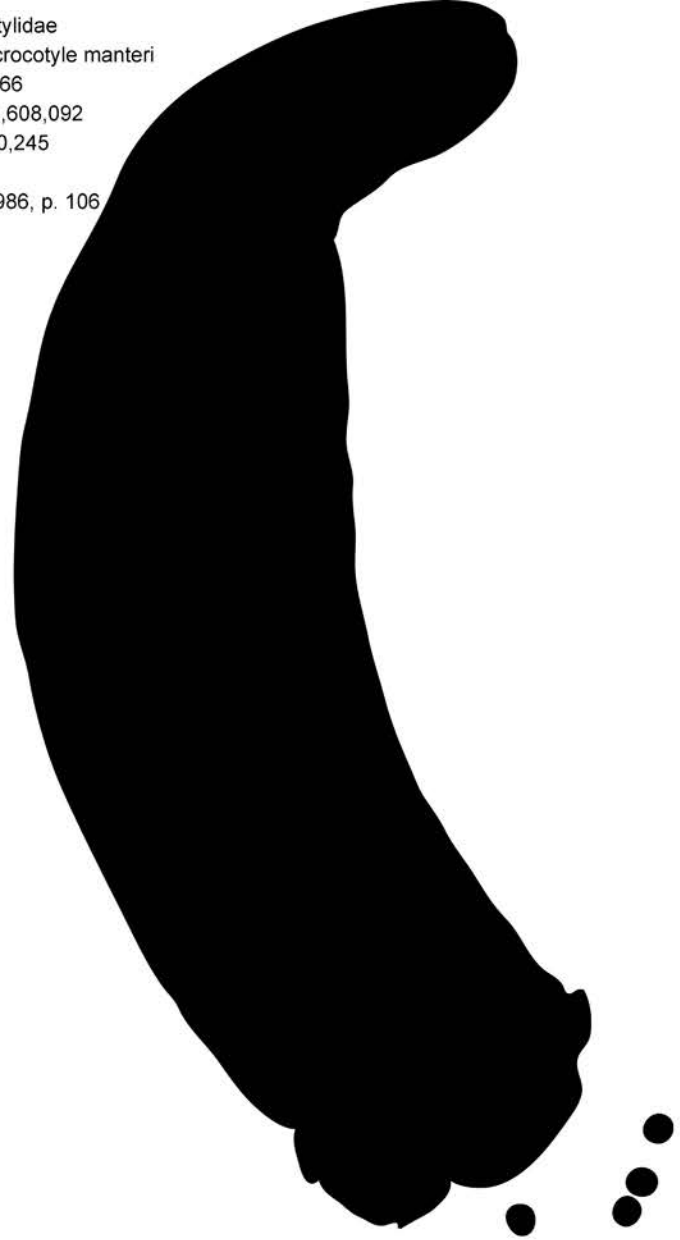

Family: Protomicrocotylidae  
Species: Protomicrocotyle minuta Ramalingam, 1960  
Body Surface: 334,808  
Clamp Surface: 6,589  
Ratio: 1.97  
Reference: Ramalingam, 1960, p. 377

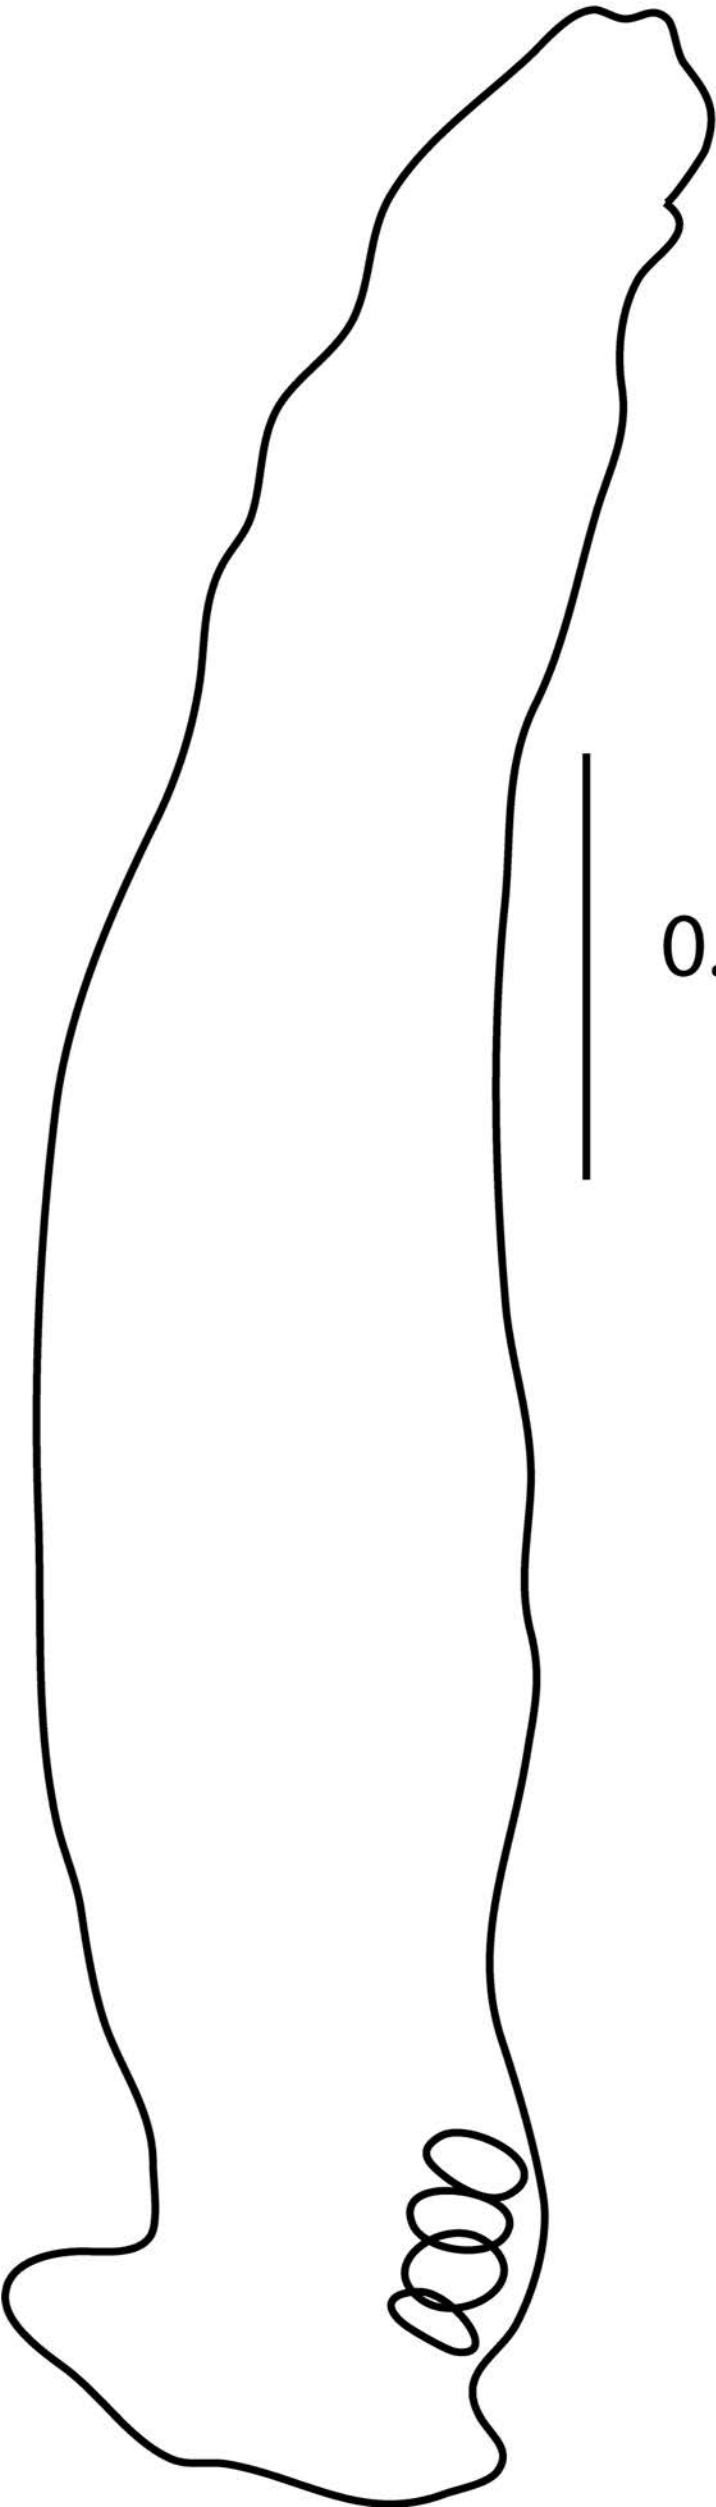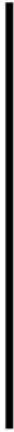

0.25 mm

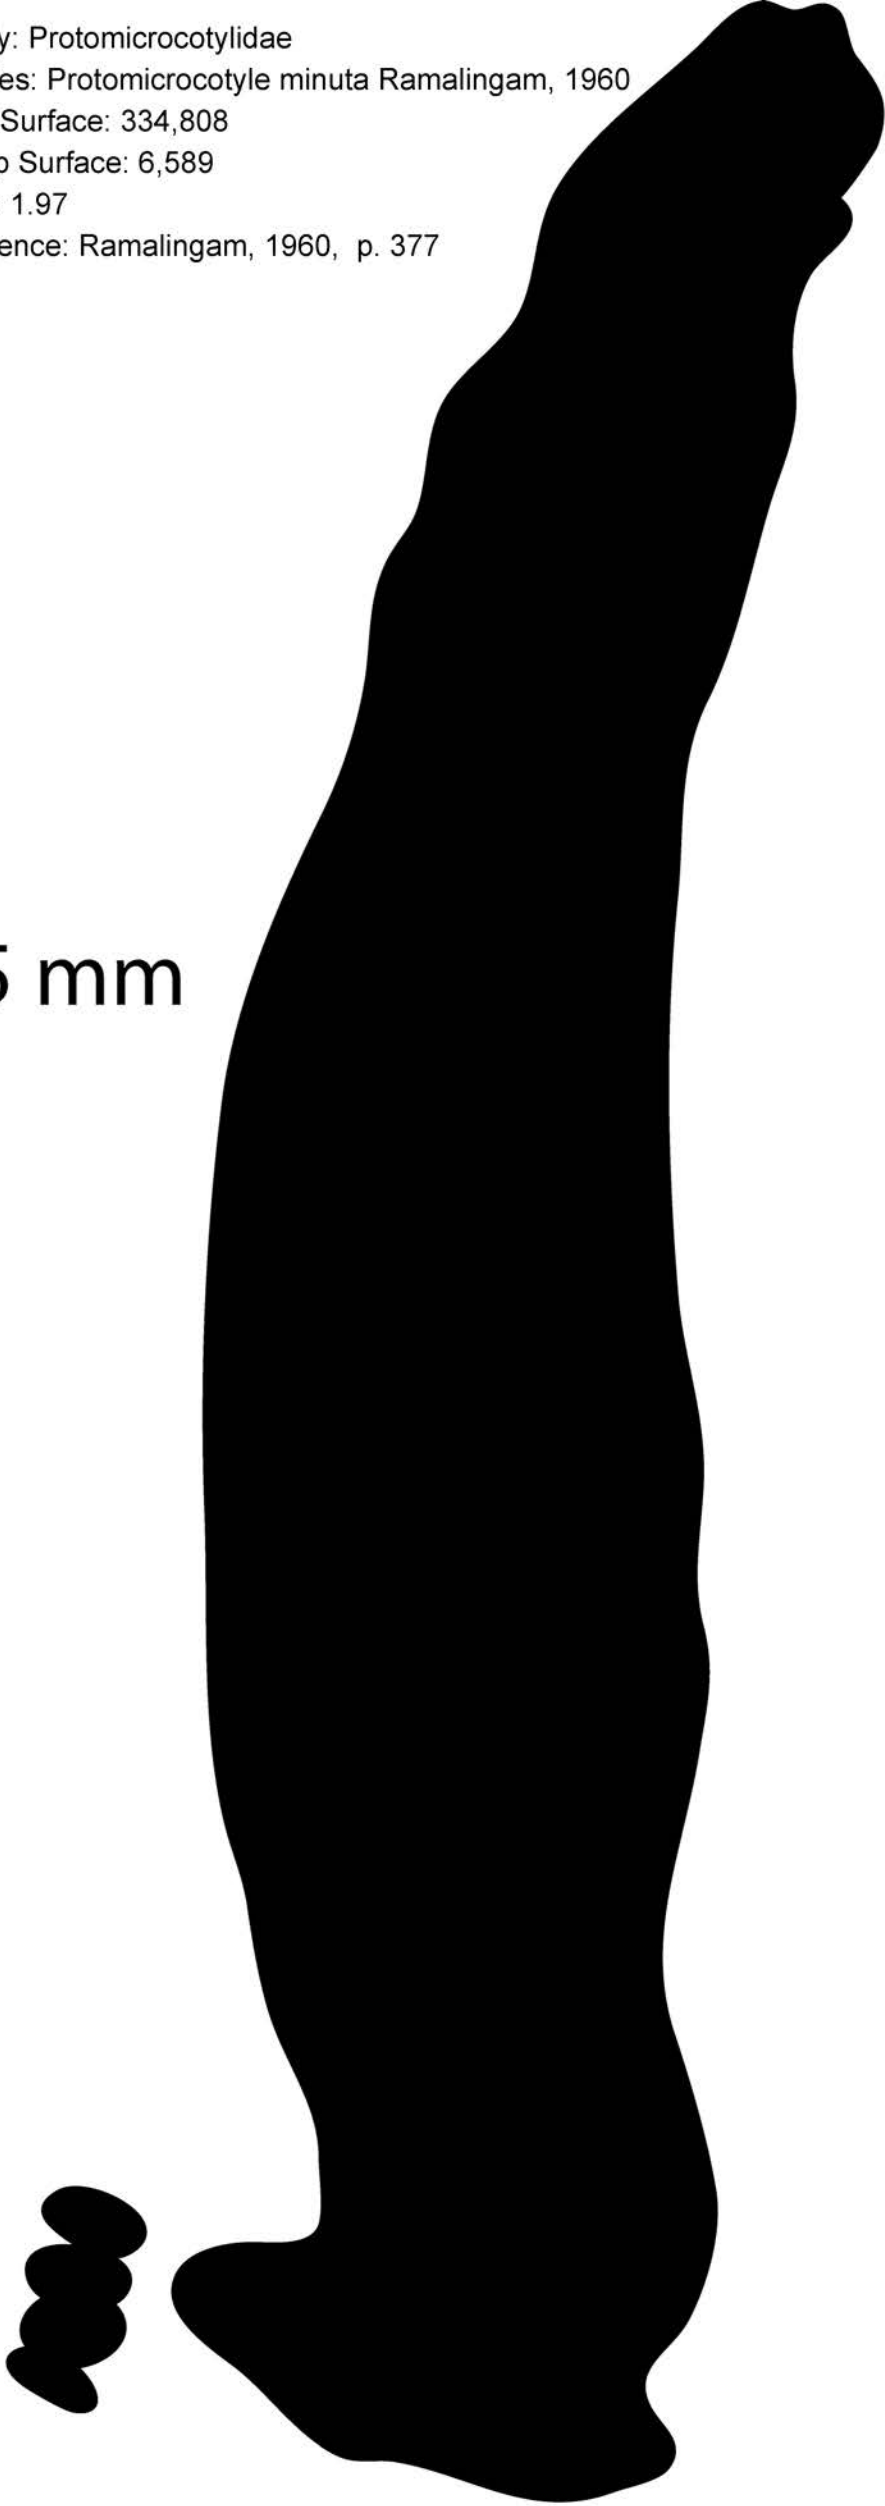

Family: Protomicrocotylidae

Species: Protomicrocotyle mirabilis (MacCallum, 1918) Johnston & Tiegs, 1922

Body Surface: 231,559

Clamp Surface: 7,854

Ratio: 3.39

Reference: Wahl, 1972, p. 321

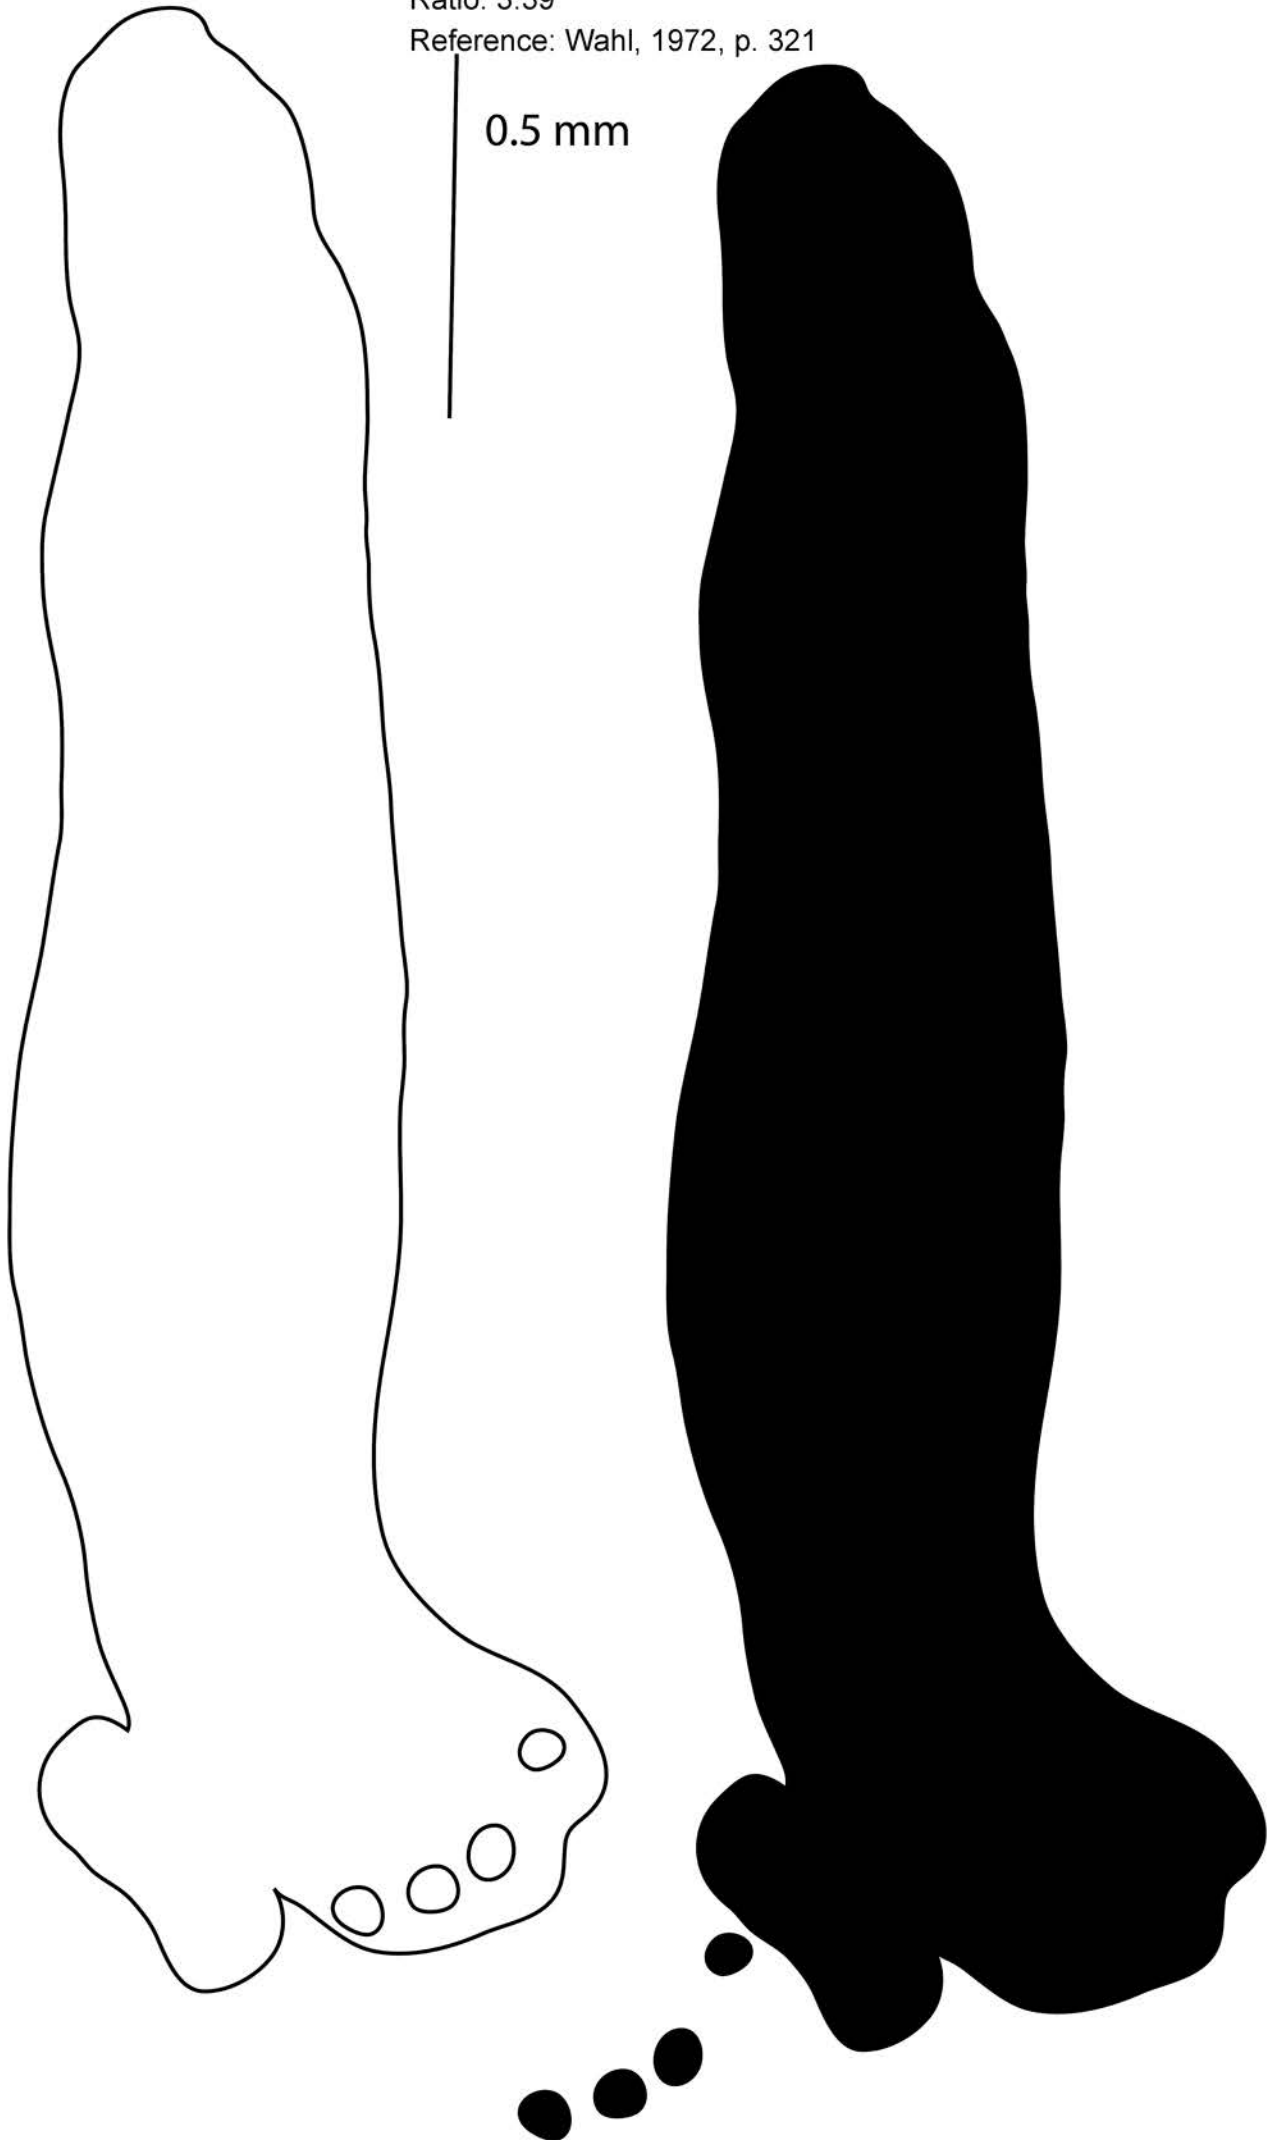

Family: Protomicrocotylidae

Species: *Protomicrocotyle nayaritensis* Bravo-Hollis, 1979

Body Surface: 7,317,320

Clamp Surface: 13,238

Ratio: 0.18

Reference: Bravo Hollis, 1979, p. 190

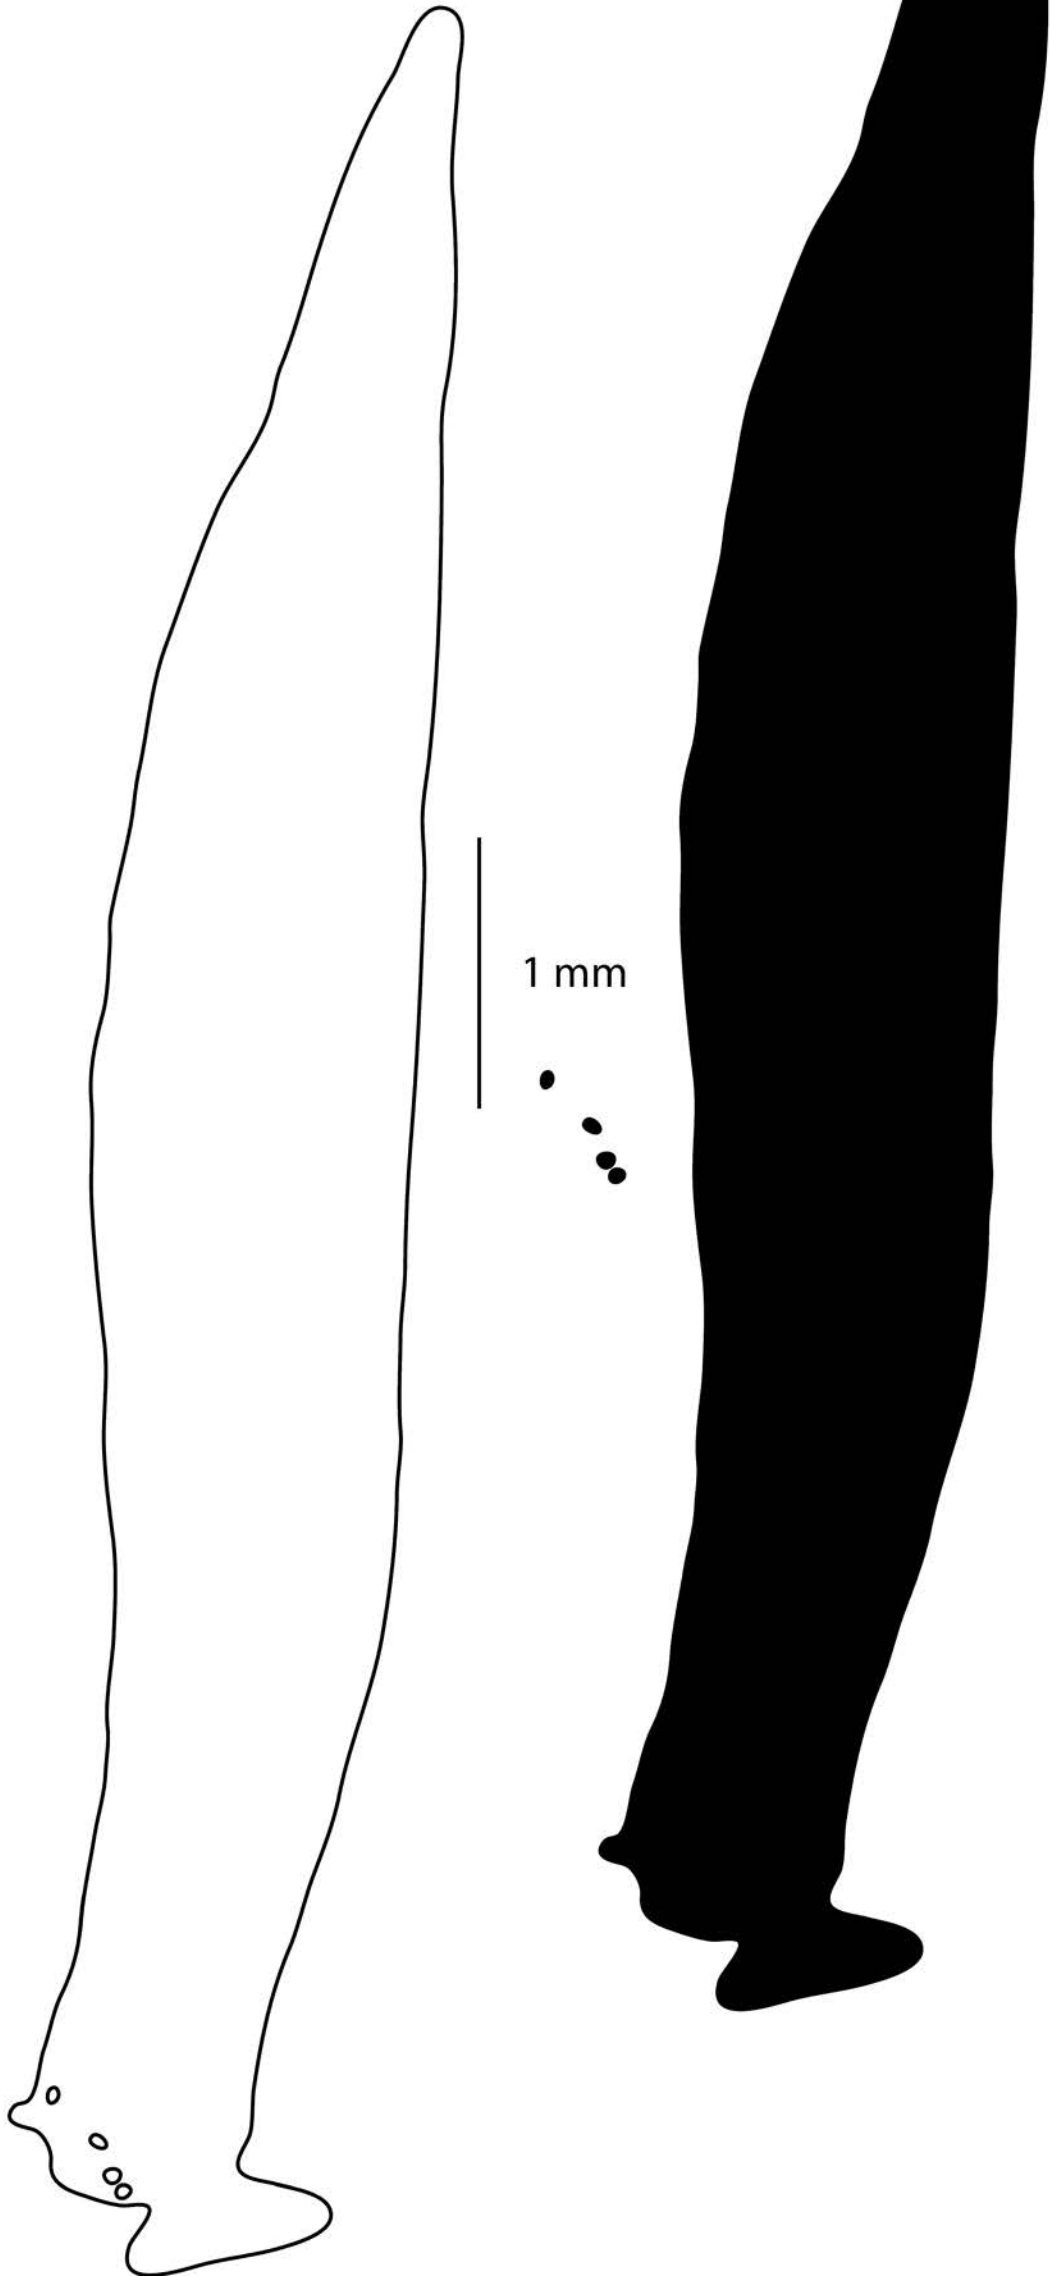



Family: Protomicrocotylidae  
Species: *Vallisiopsis contorta* Subhadrappa, 1951  
Body Surface: 29,848  
Clamp Surface: 281  
Ratio: 0.94  
Reference: Lebedev, 1986, p. 17

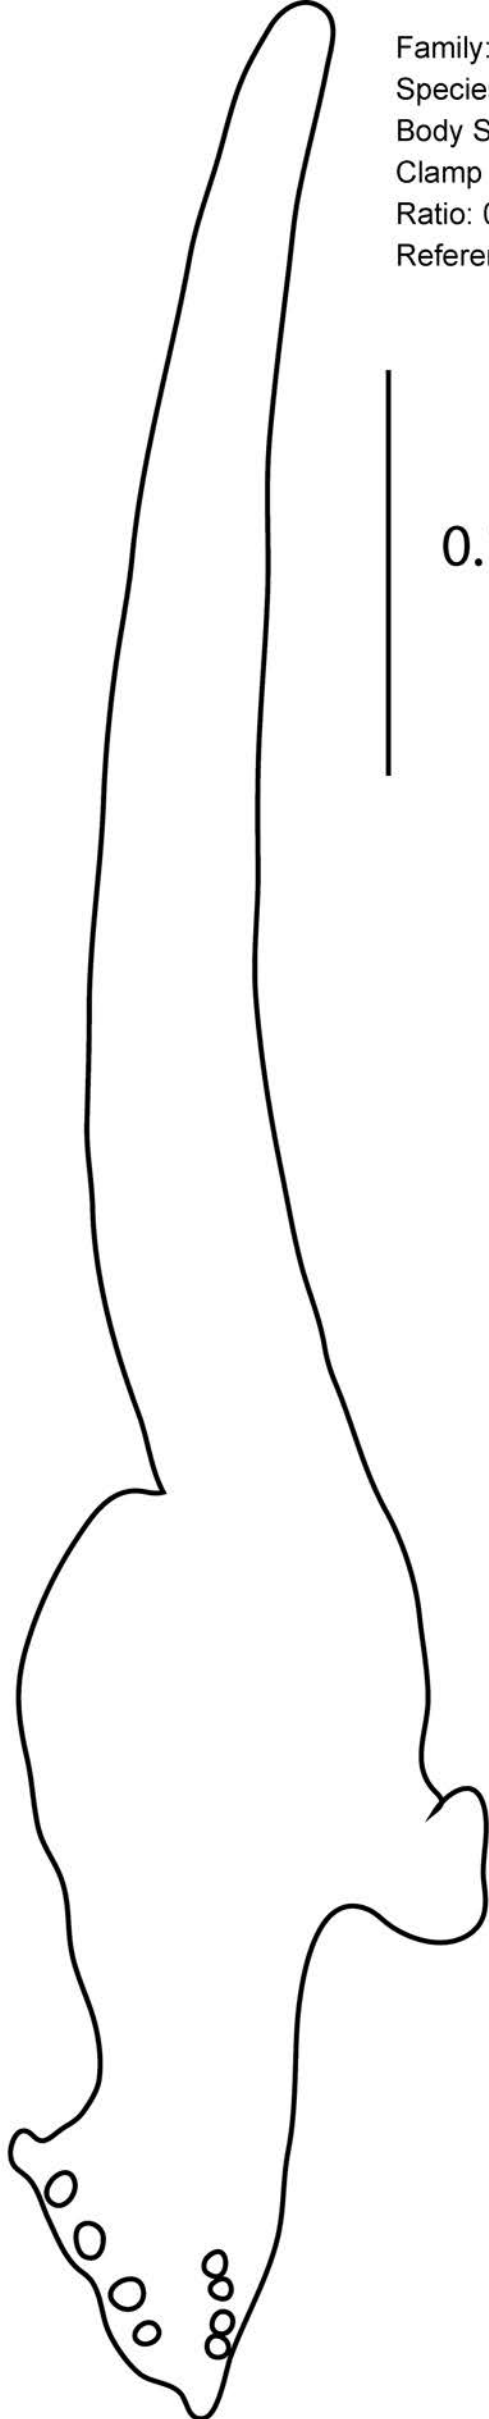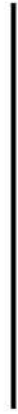

0.1 mm

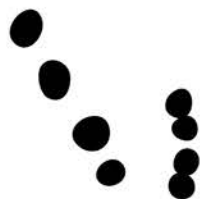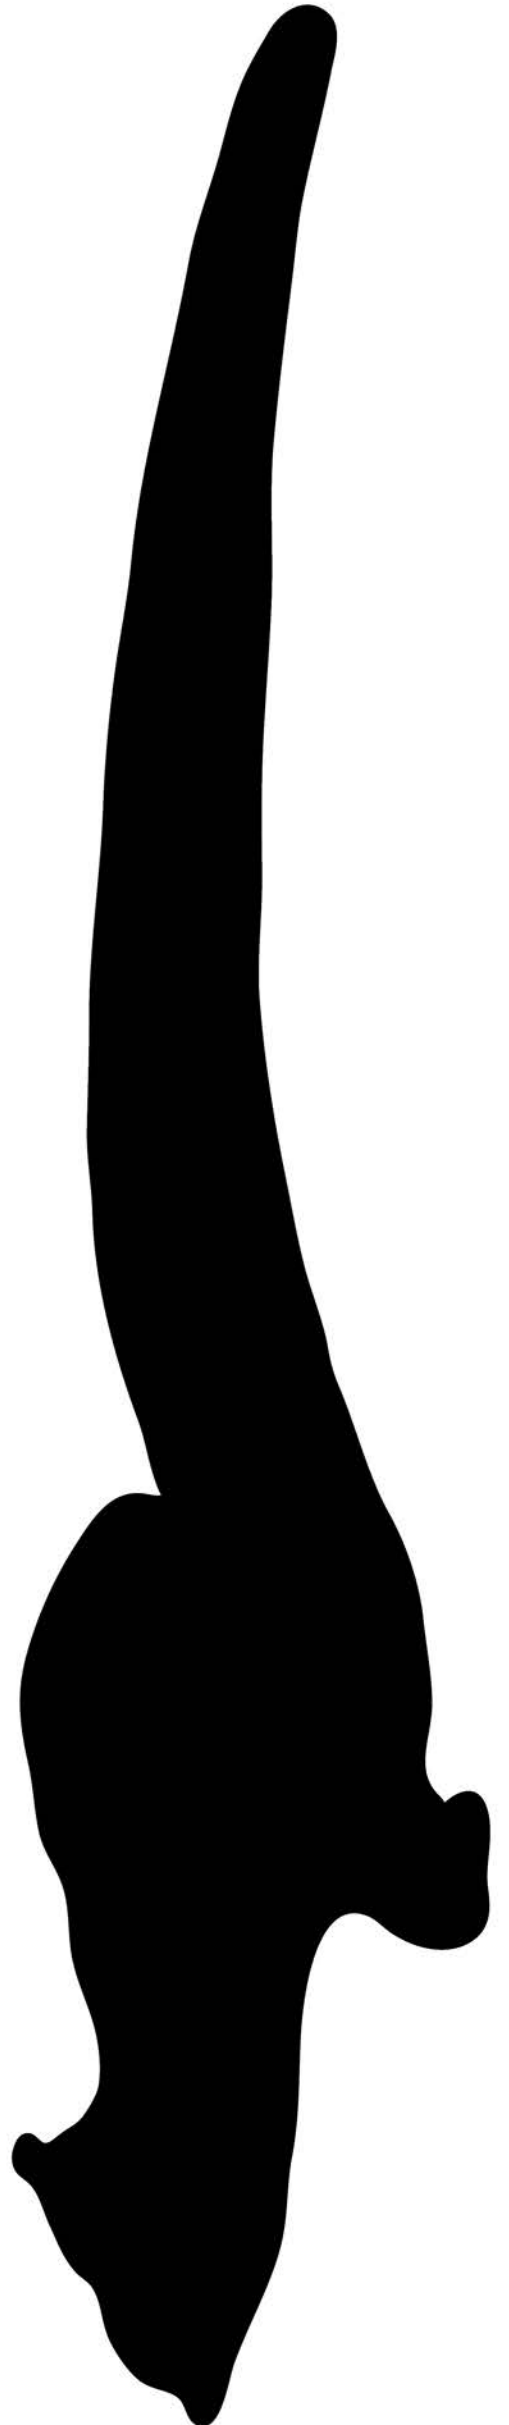

Family: Protomicrocotylidae  
Species: *Vallisiopsis sphyraenae* Yamaguti, 1968  
Body Surface: 6,746,717  
Clamp Surface: 48,813  
Ratio: 0.72  
Reference: Yamaguti, 1968, p. 251

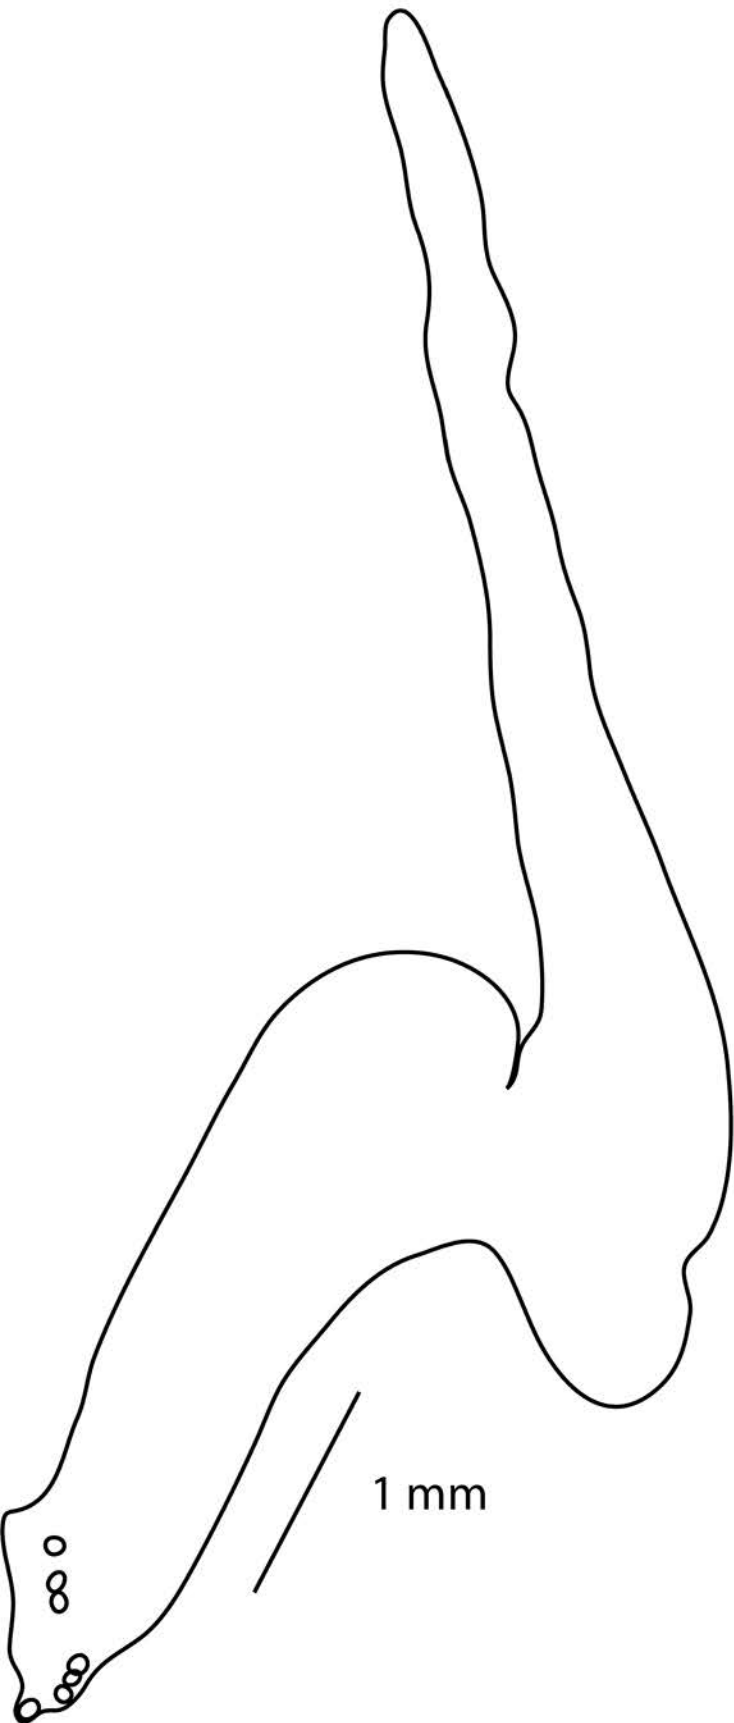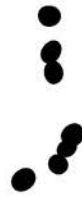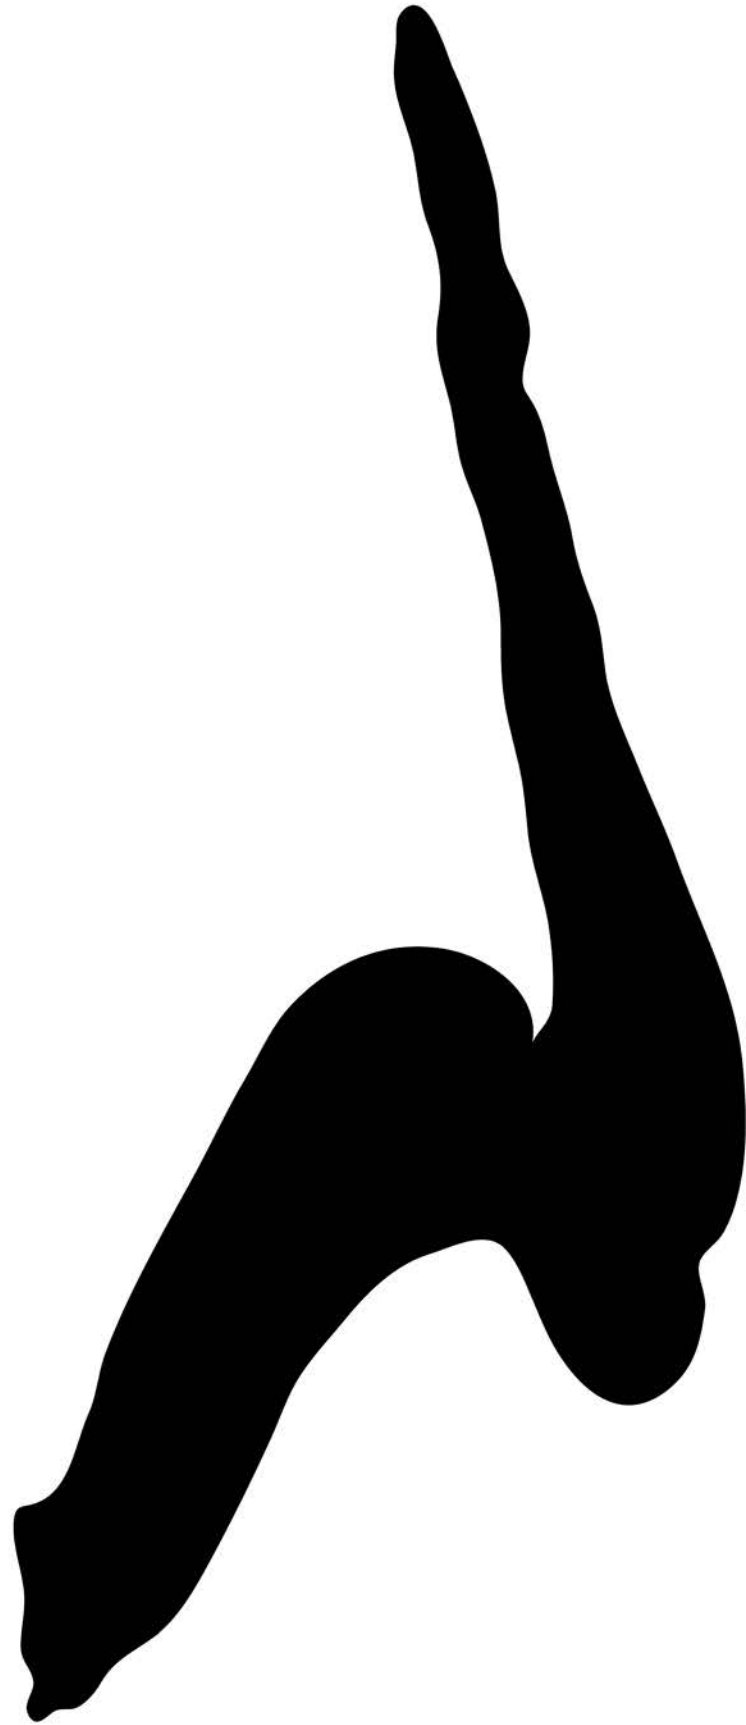

0.5 mm

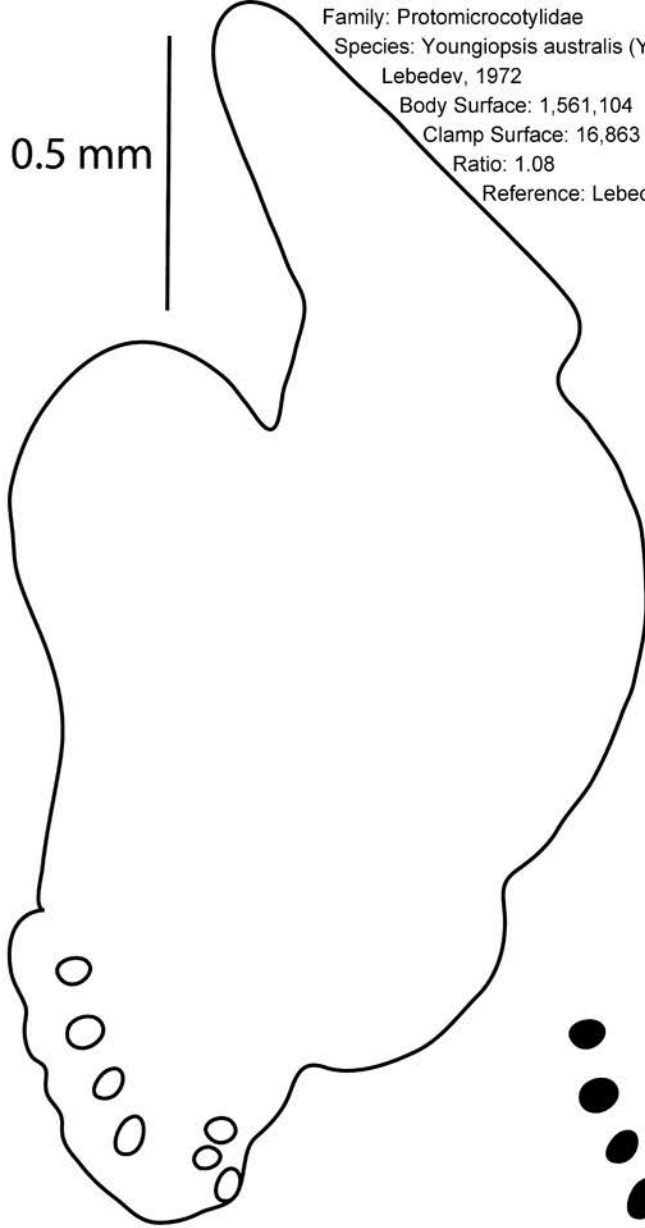

Family: Protomicrocotylidae  
Species: *Youngiopsis australis* (Young, 1968)  
Lebedev, 1972  
Body Surface: 1,561,104  
Clamp Surface: 16,863  
Ratio: 1.08  
Reference: Lebedev, 1986, p. 117

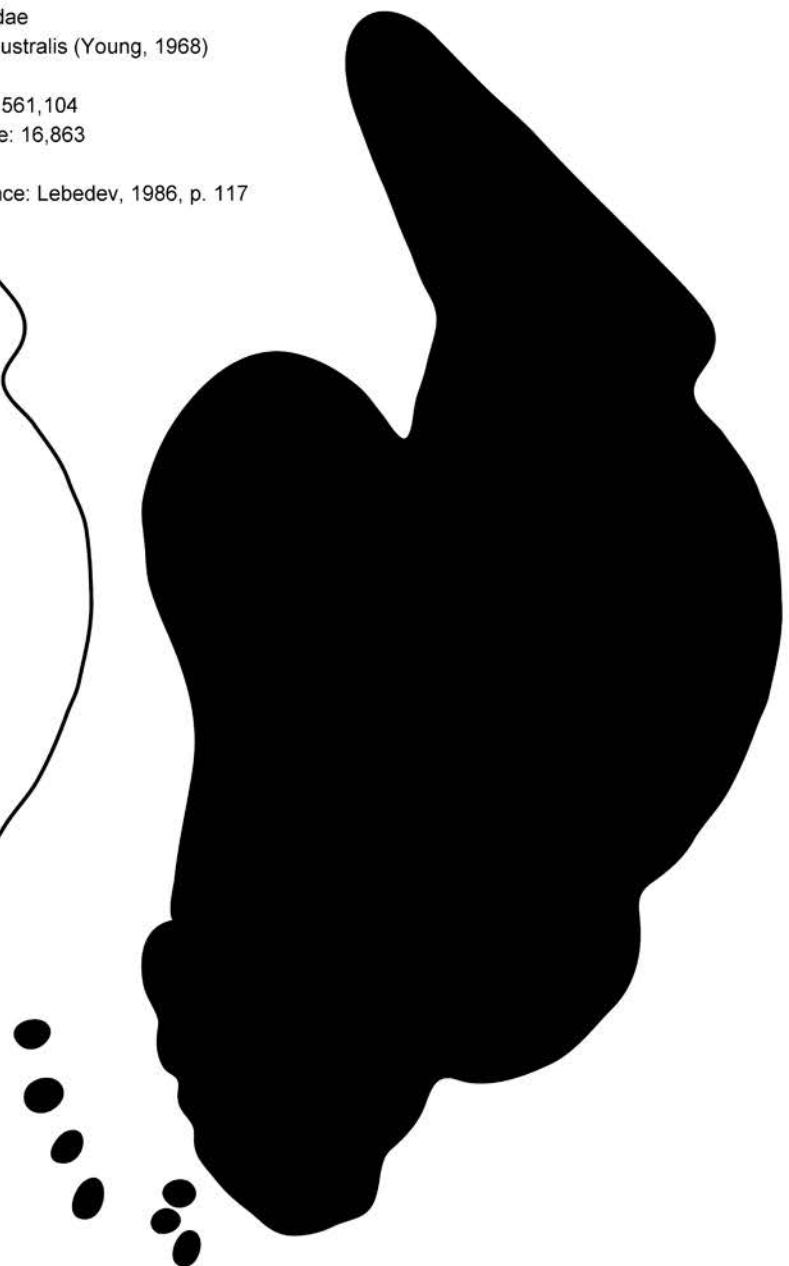

Family: Pseudoclidophoridae  
Species: *Allopseudoclidophora opelu* Yamaguti, 1965  
Body Surface: 5,244,324 ; Clamp Surface: 20,471  
Ratio: 0.39  
Reference: Yamaguti, 1965, p. 73

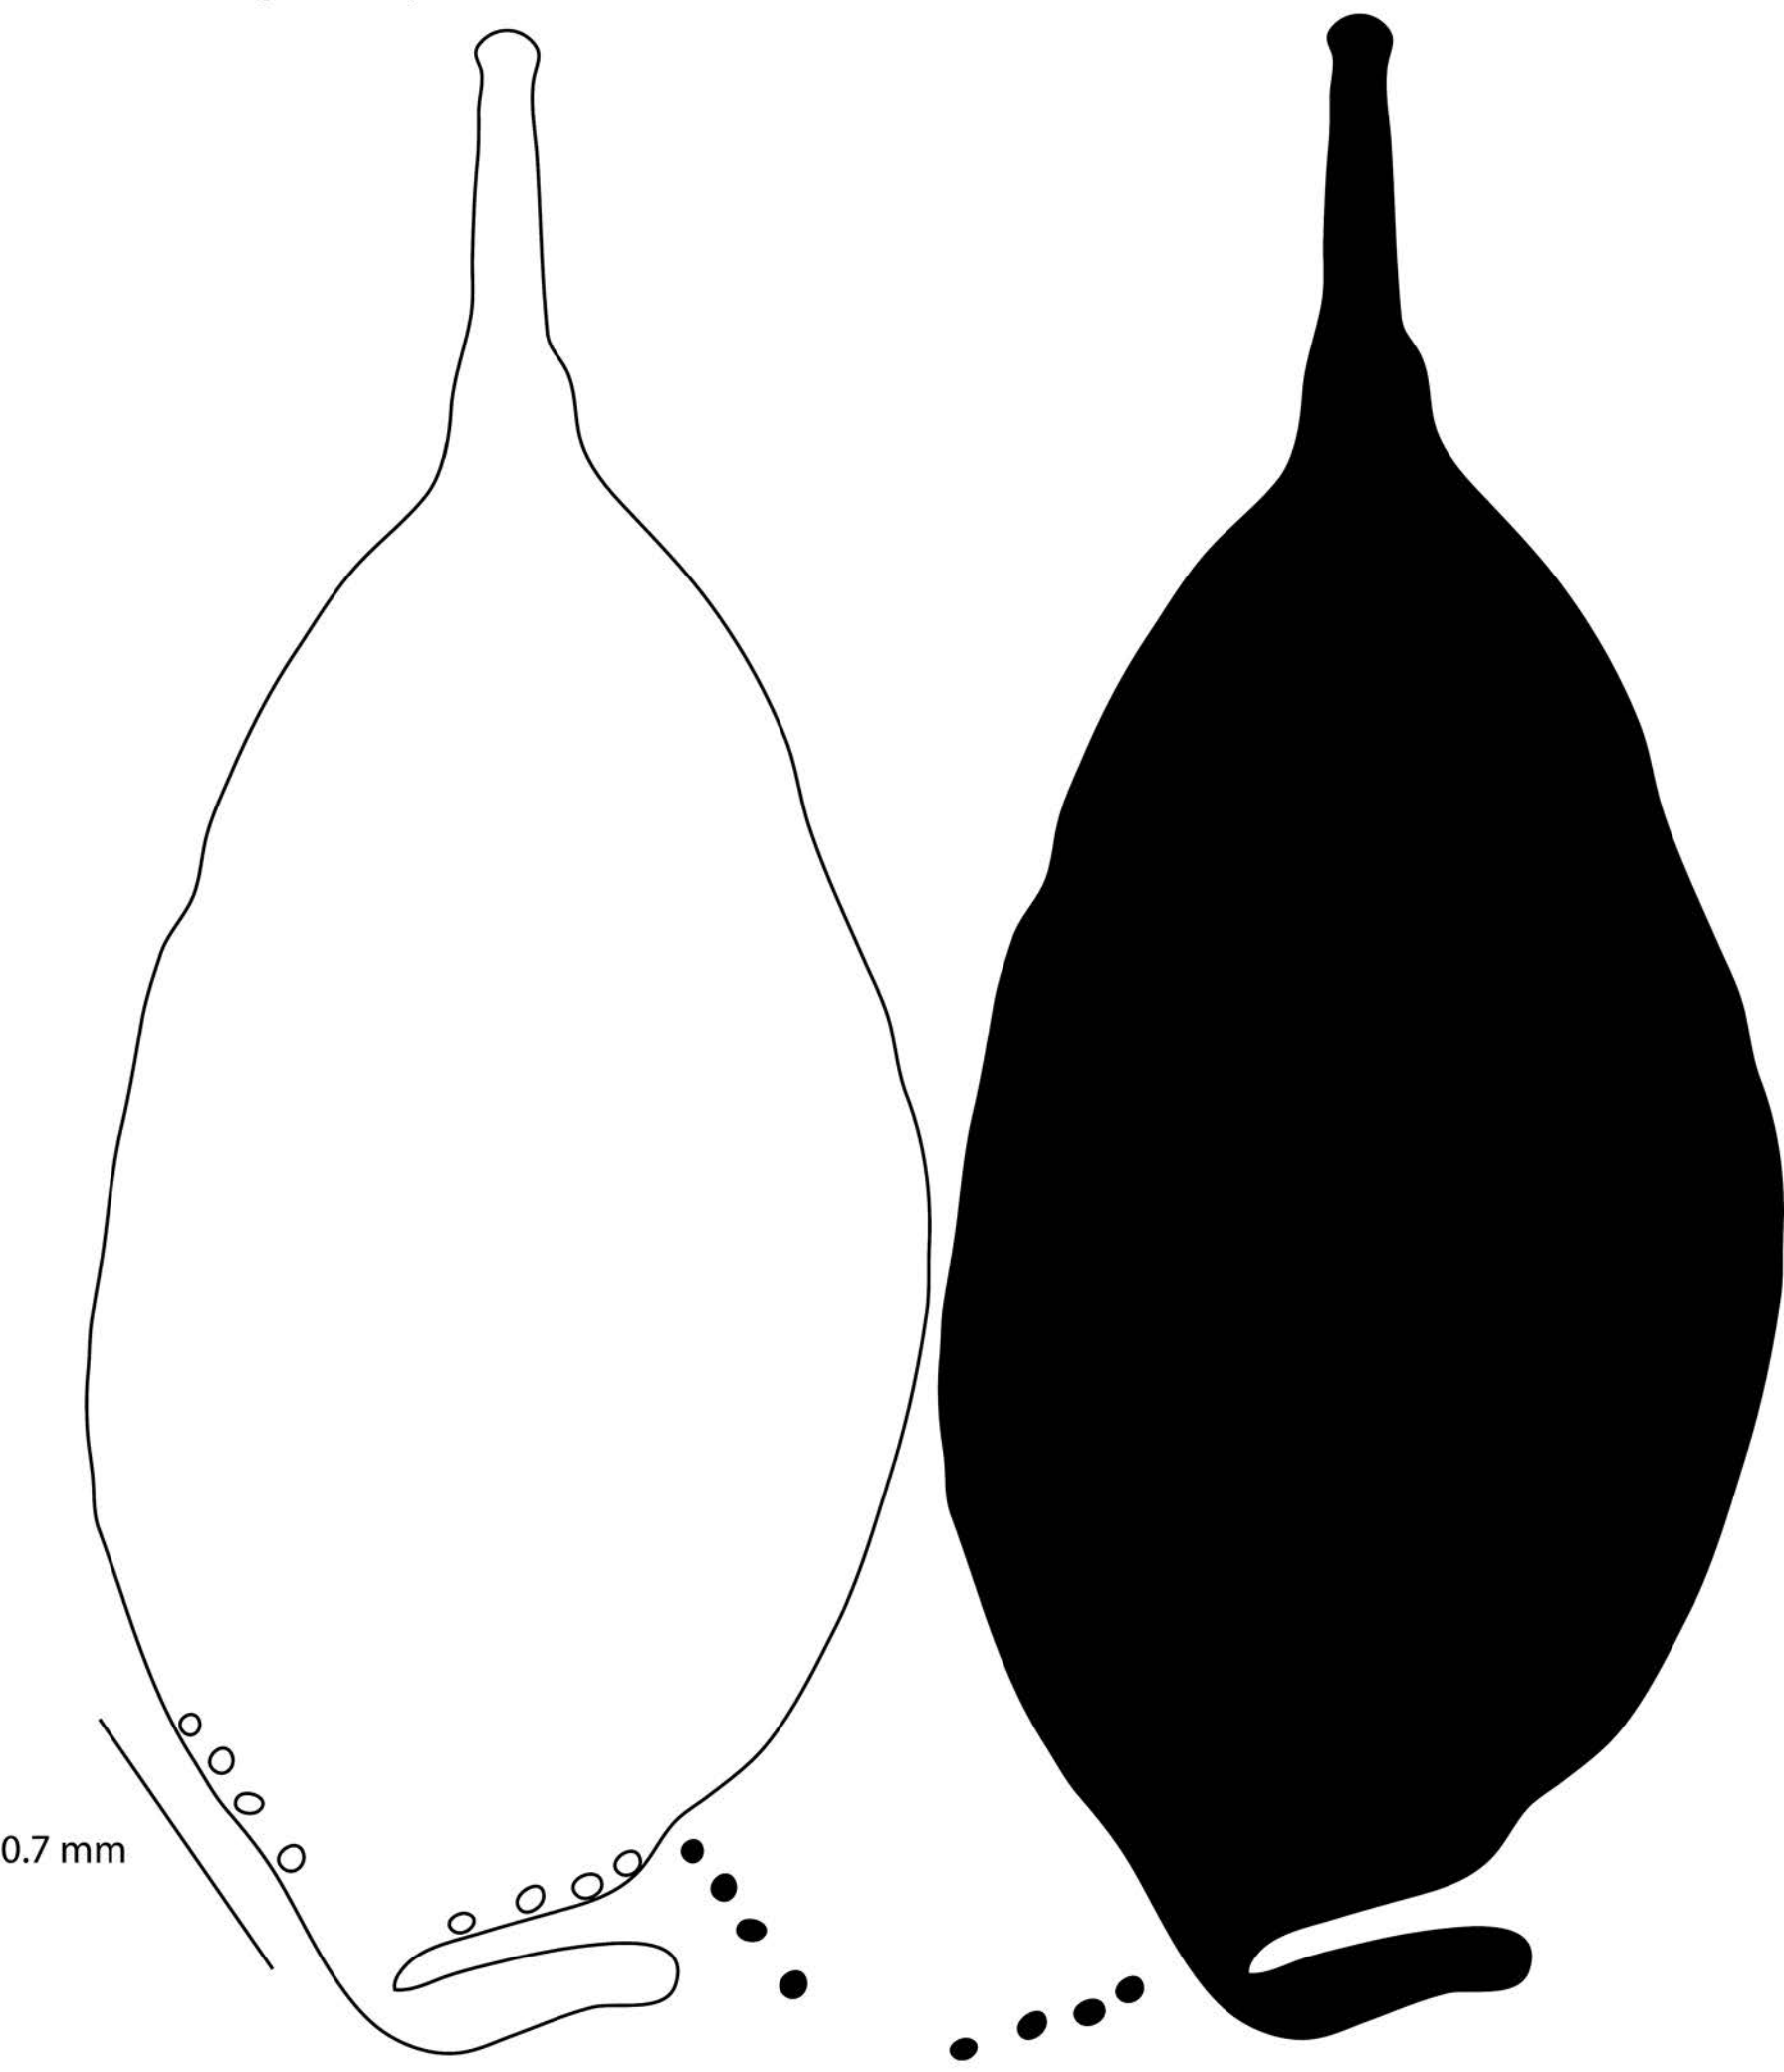

Family: Pseudodictyophoridae

Species: *Gephyrocotyle ixoracorona*

Unnithan, 1966

Body Surface: 482,140

Clamp Surface: 14,380

Ratio: 2.98

Reference: Pandey, 2008, p. 340

0.5 mm

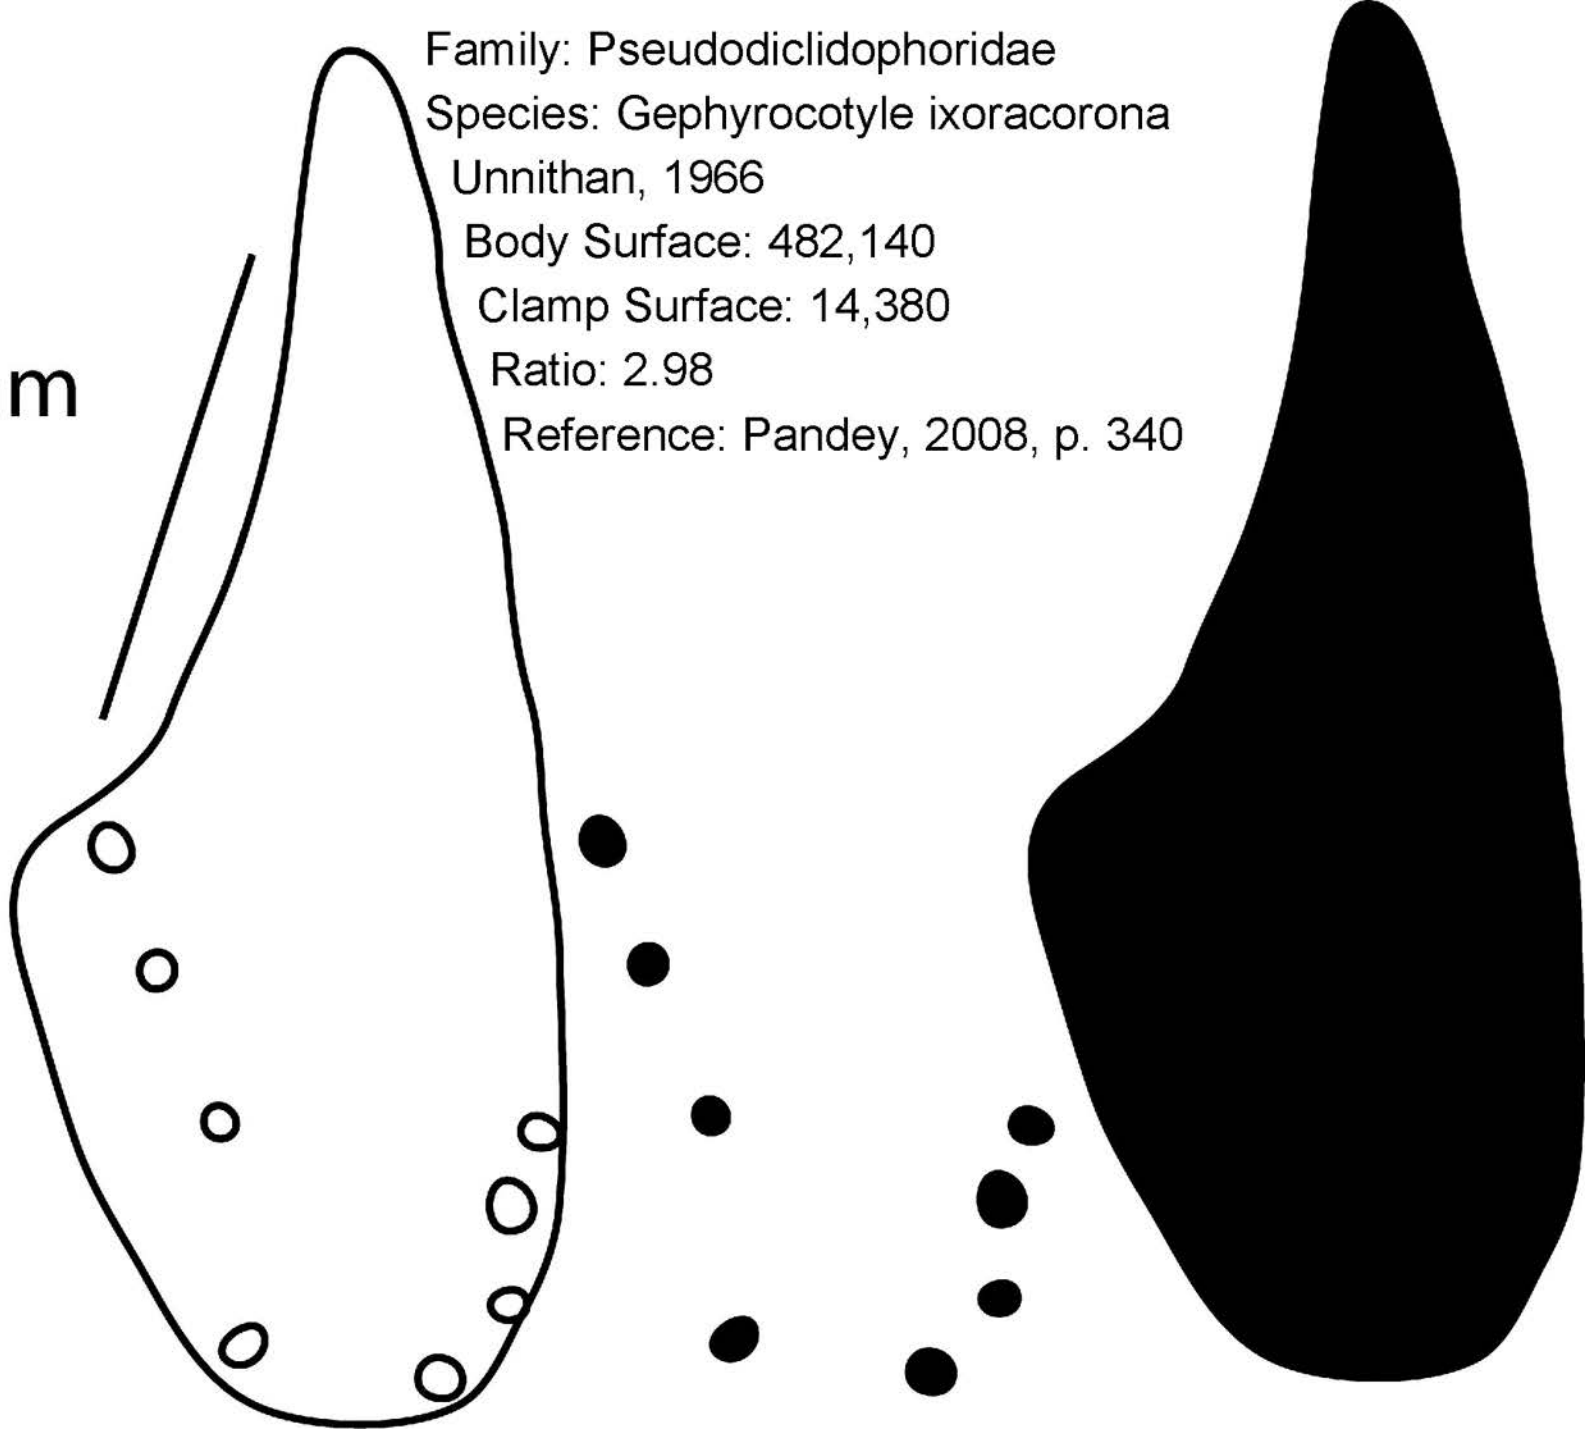

Family: Pseudodiclidophoridae  
Species: Pseudodiclidophora decapteri  
Yamaguti, 1965  
Body surface: 1,163,641  
Clamp surface: 16,908  
Ratio: 1.45  
Reference: Yamaguti, 1965, p. 70

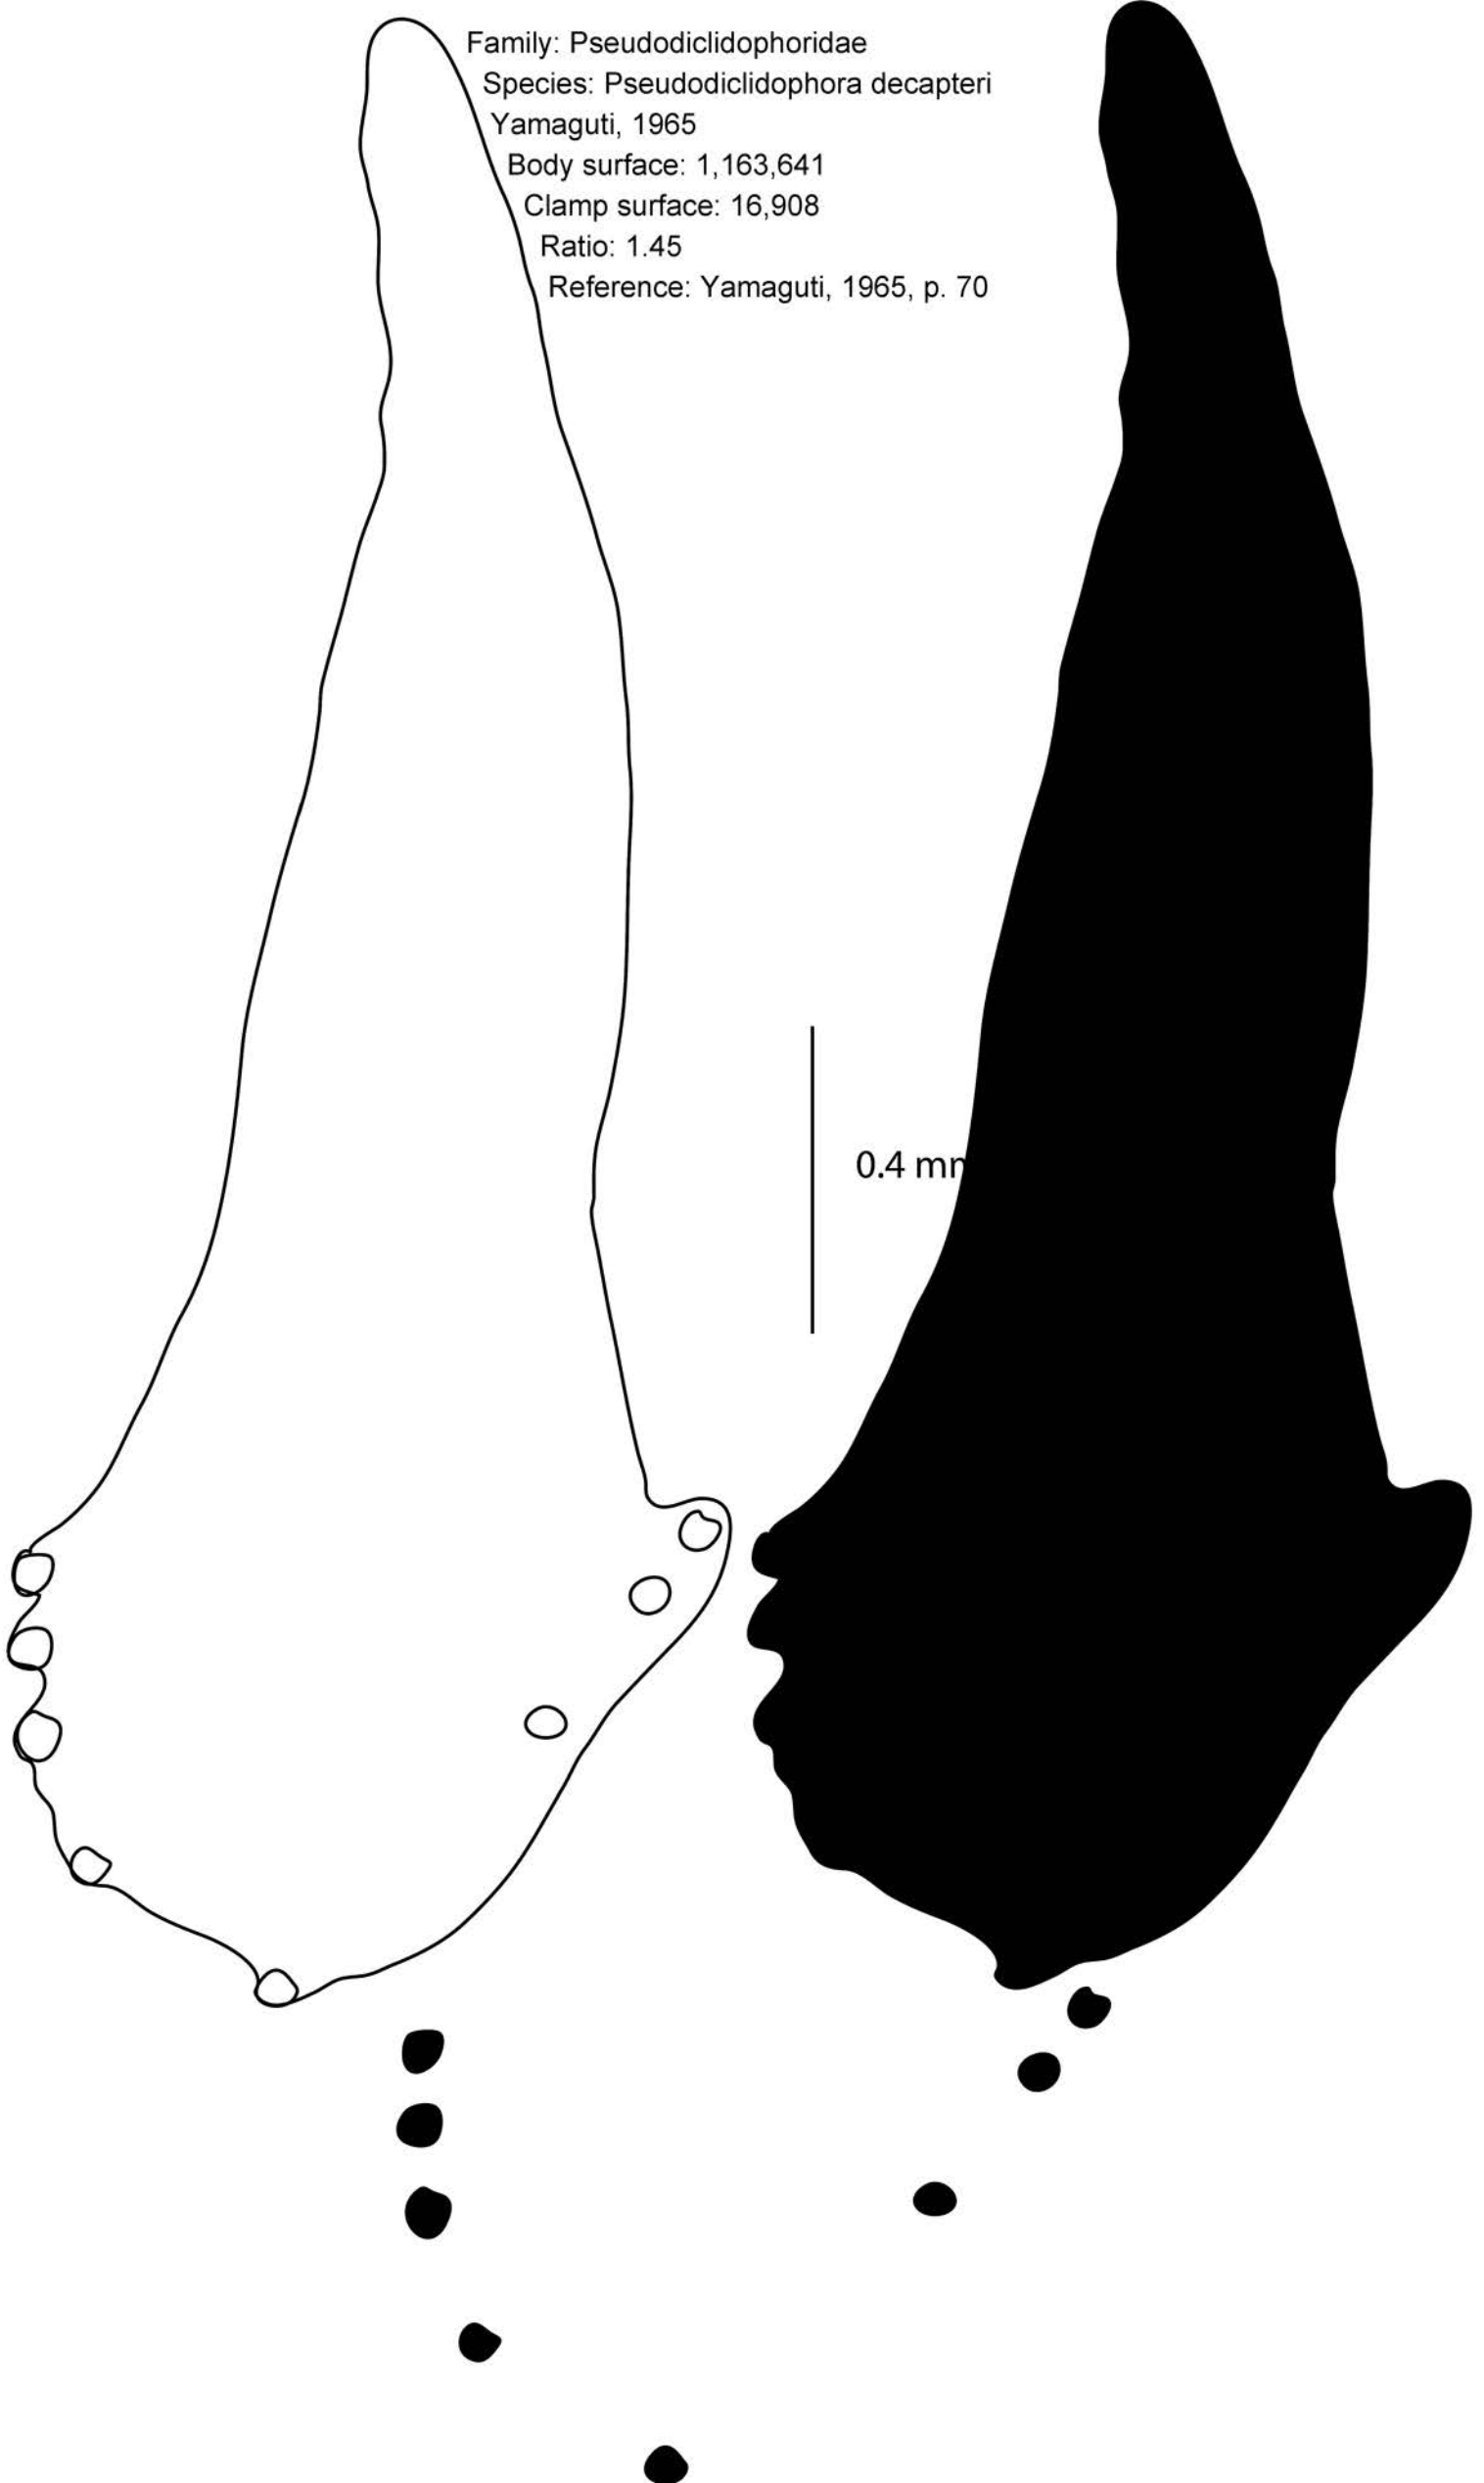

Family: Pseudoclidophoridae

Species: *Quilonella ventrosa* Lebedev & Parukhin, 1970

Body Surface: 954,583; Clamp Surface: 13,250

Ratio: 1.39

Reference: Lebedev, 1986, p. 81

0.4 mm

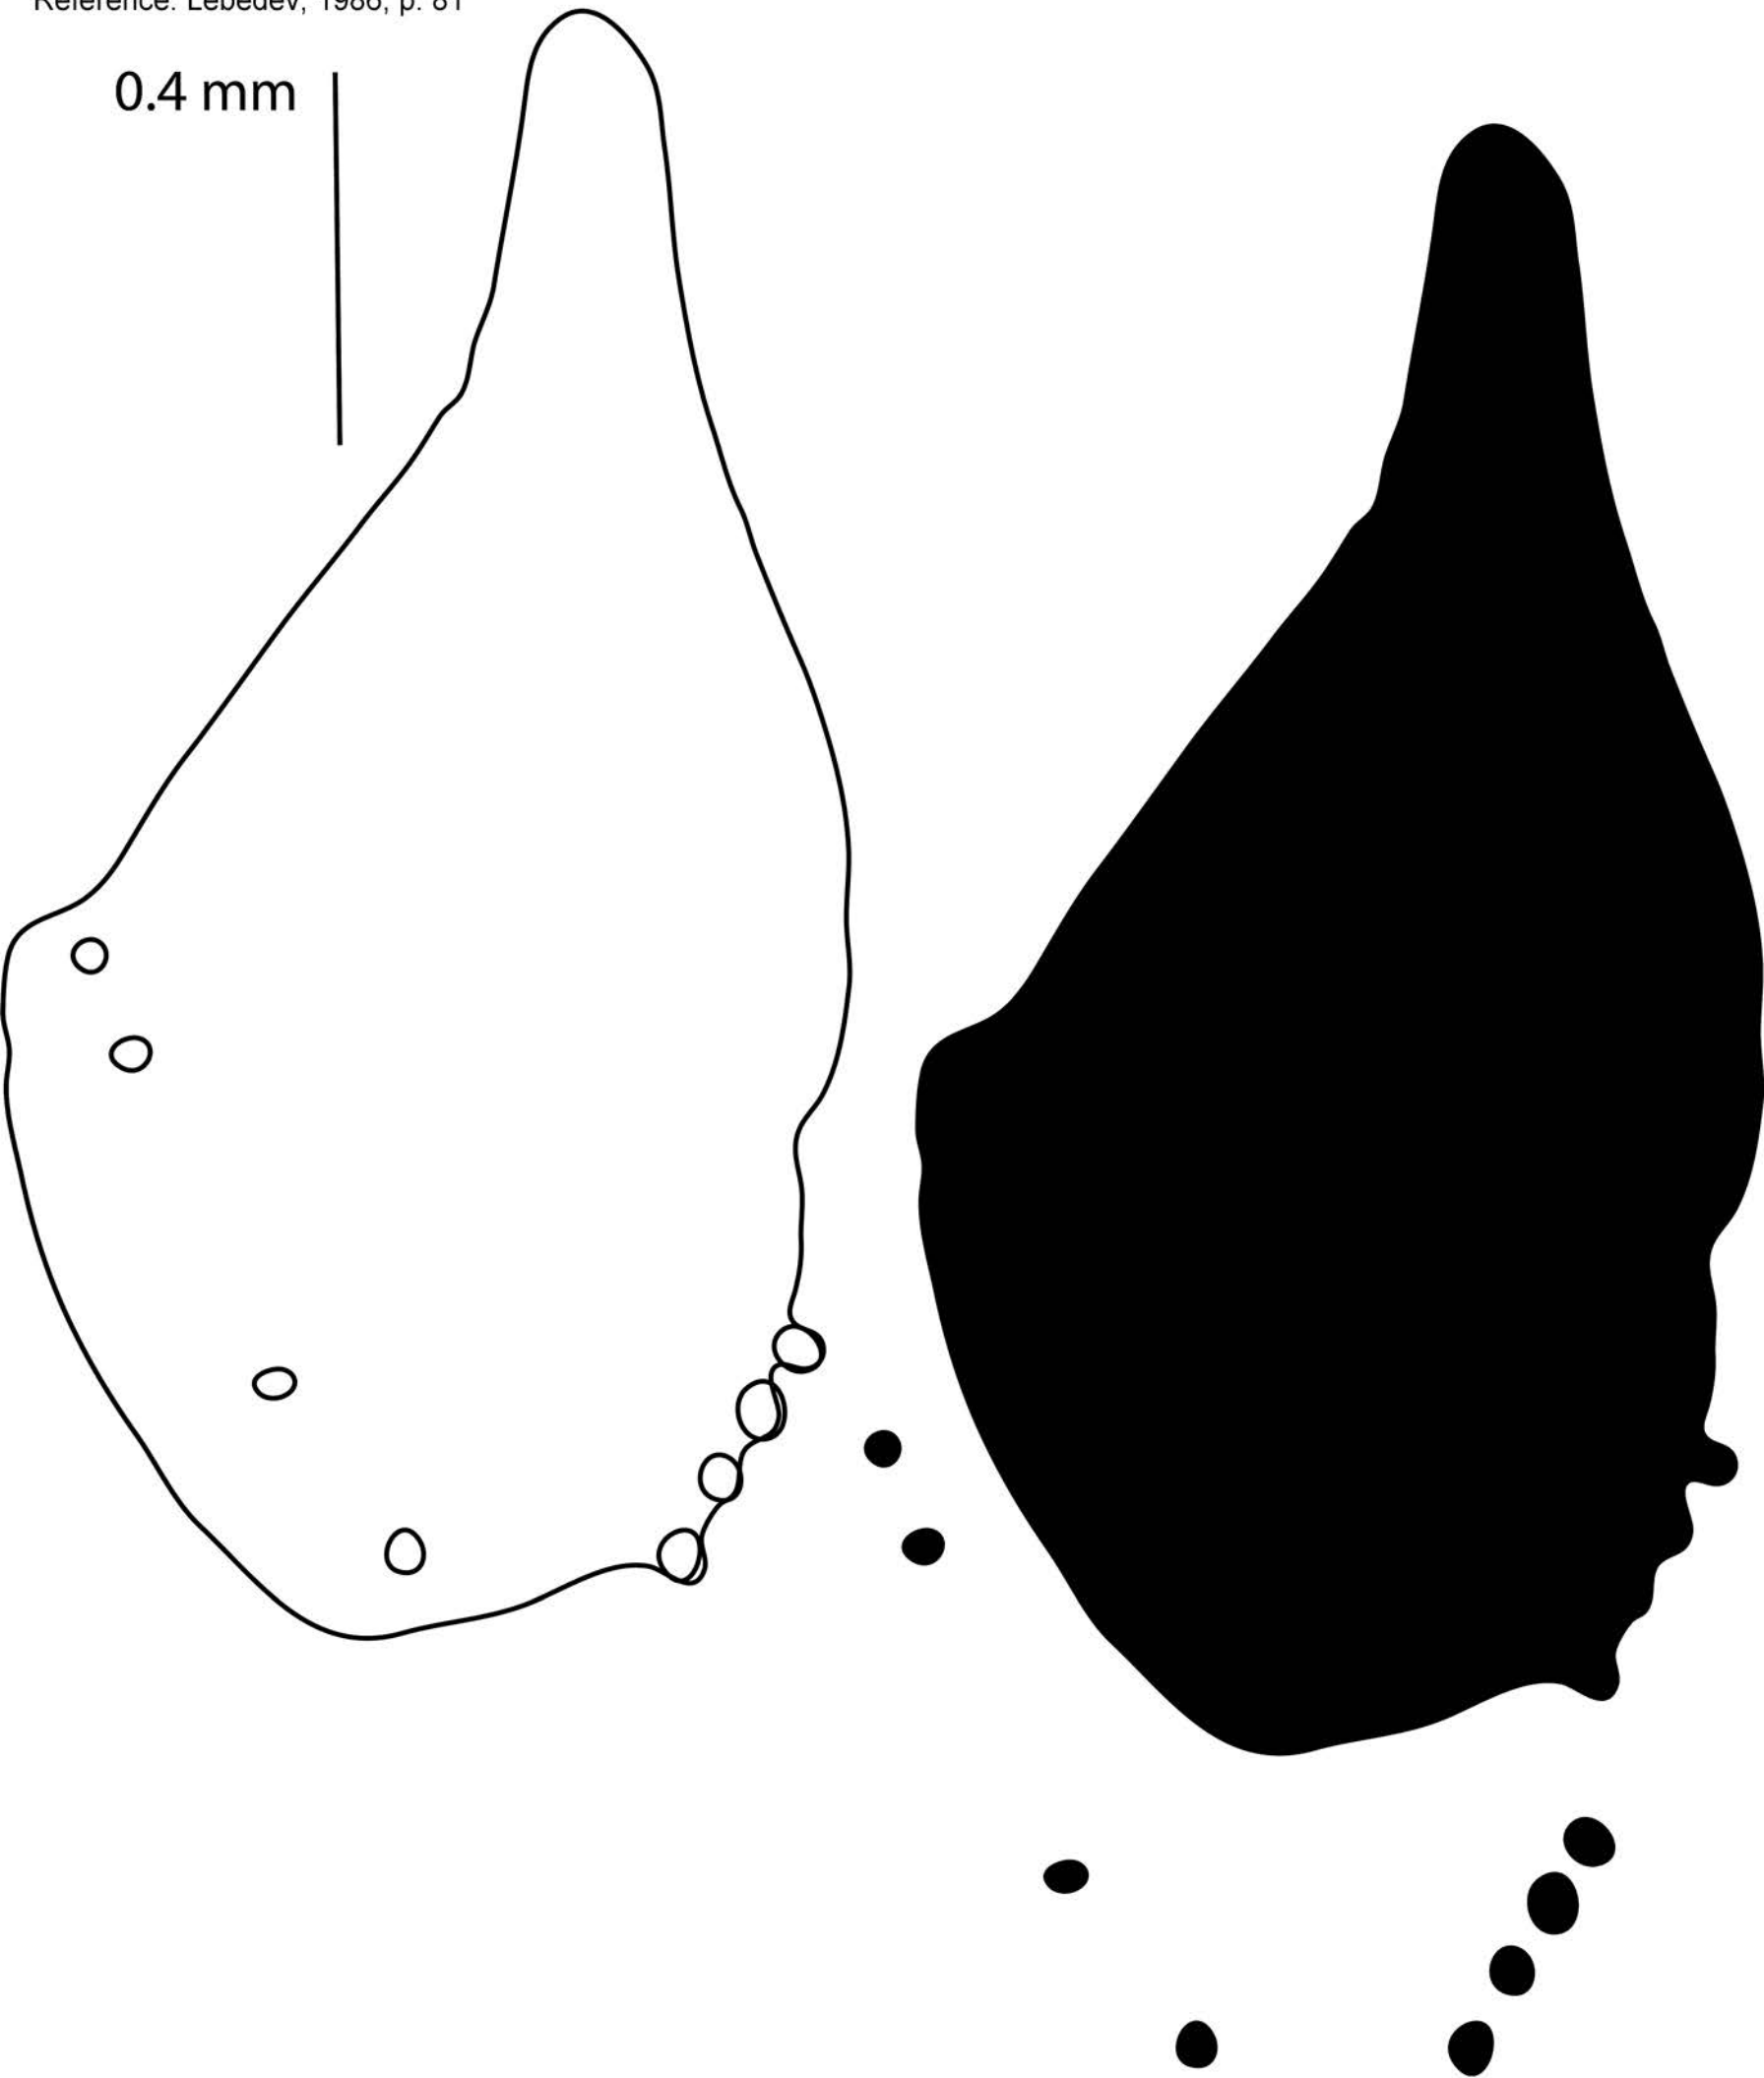

Family: Pseudoclidophoridae  
Species: *Sawquirahcotyle indica* Lebedev, 1976  
Body Surface: 2,316,402  
Clamp Surface: 45,956  
Ratio: 1.98  
Reference: Lebedev, 1986, p. 85

0.5 mm

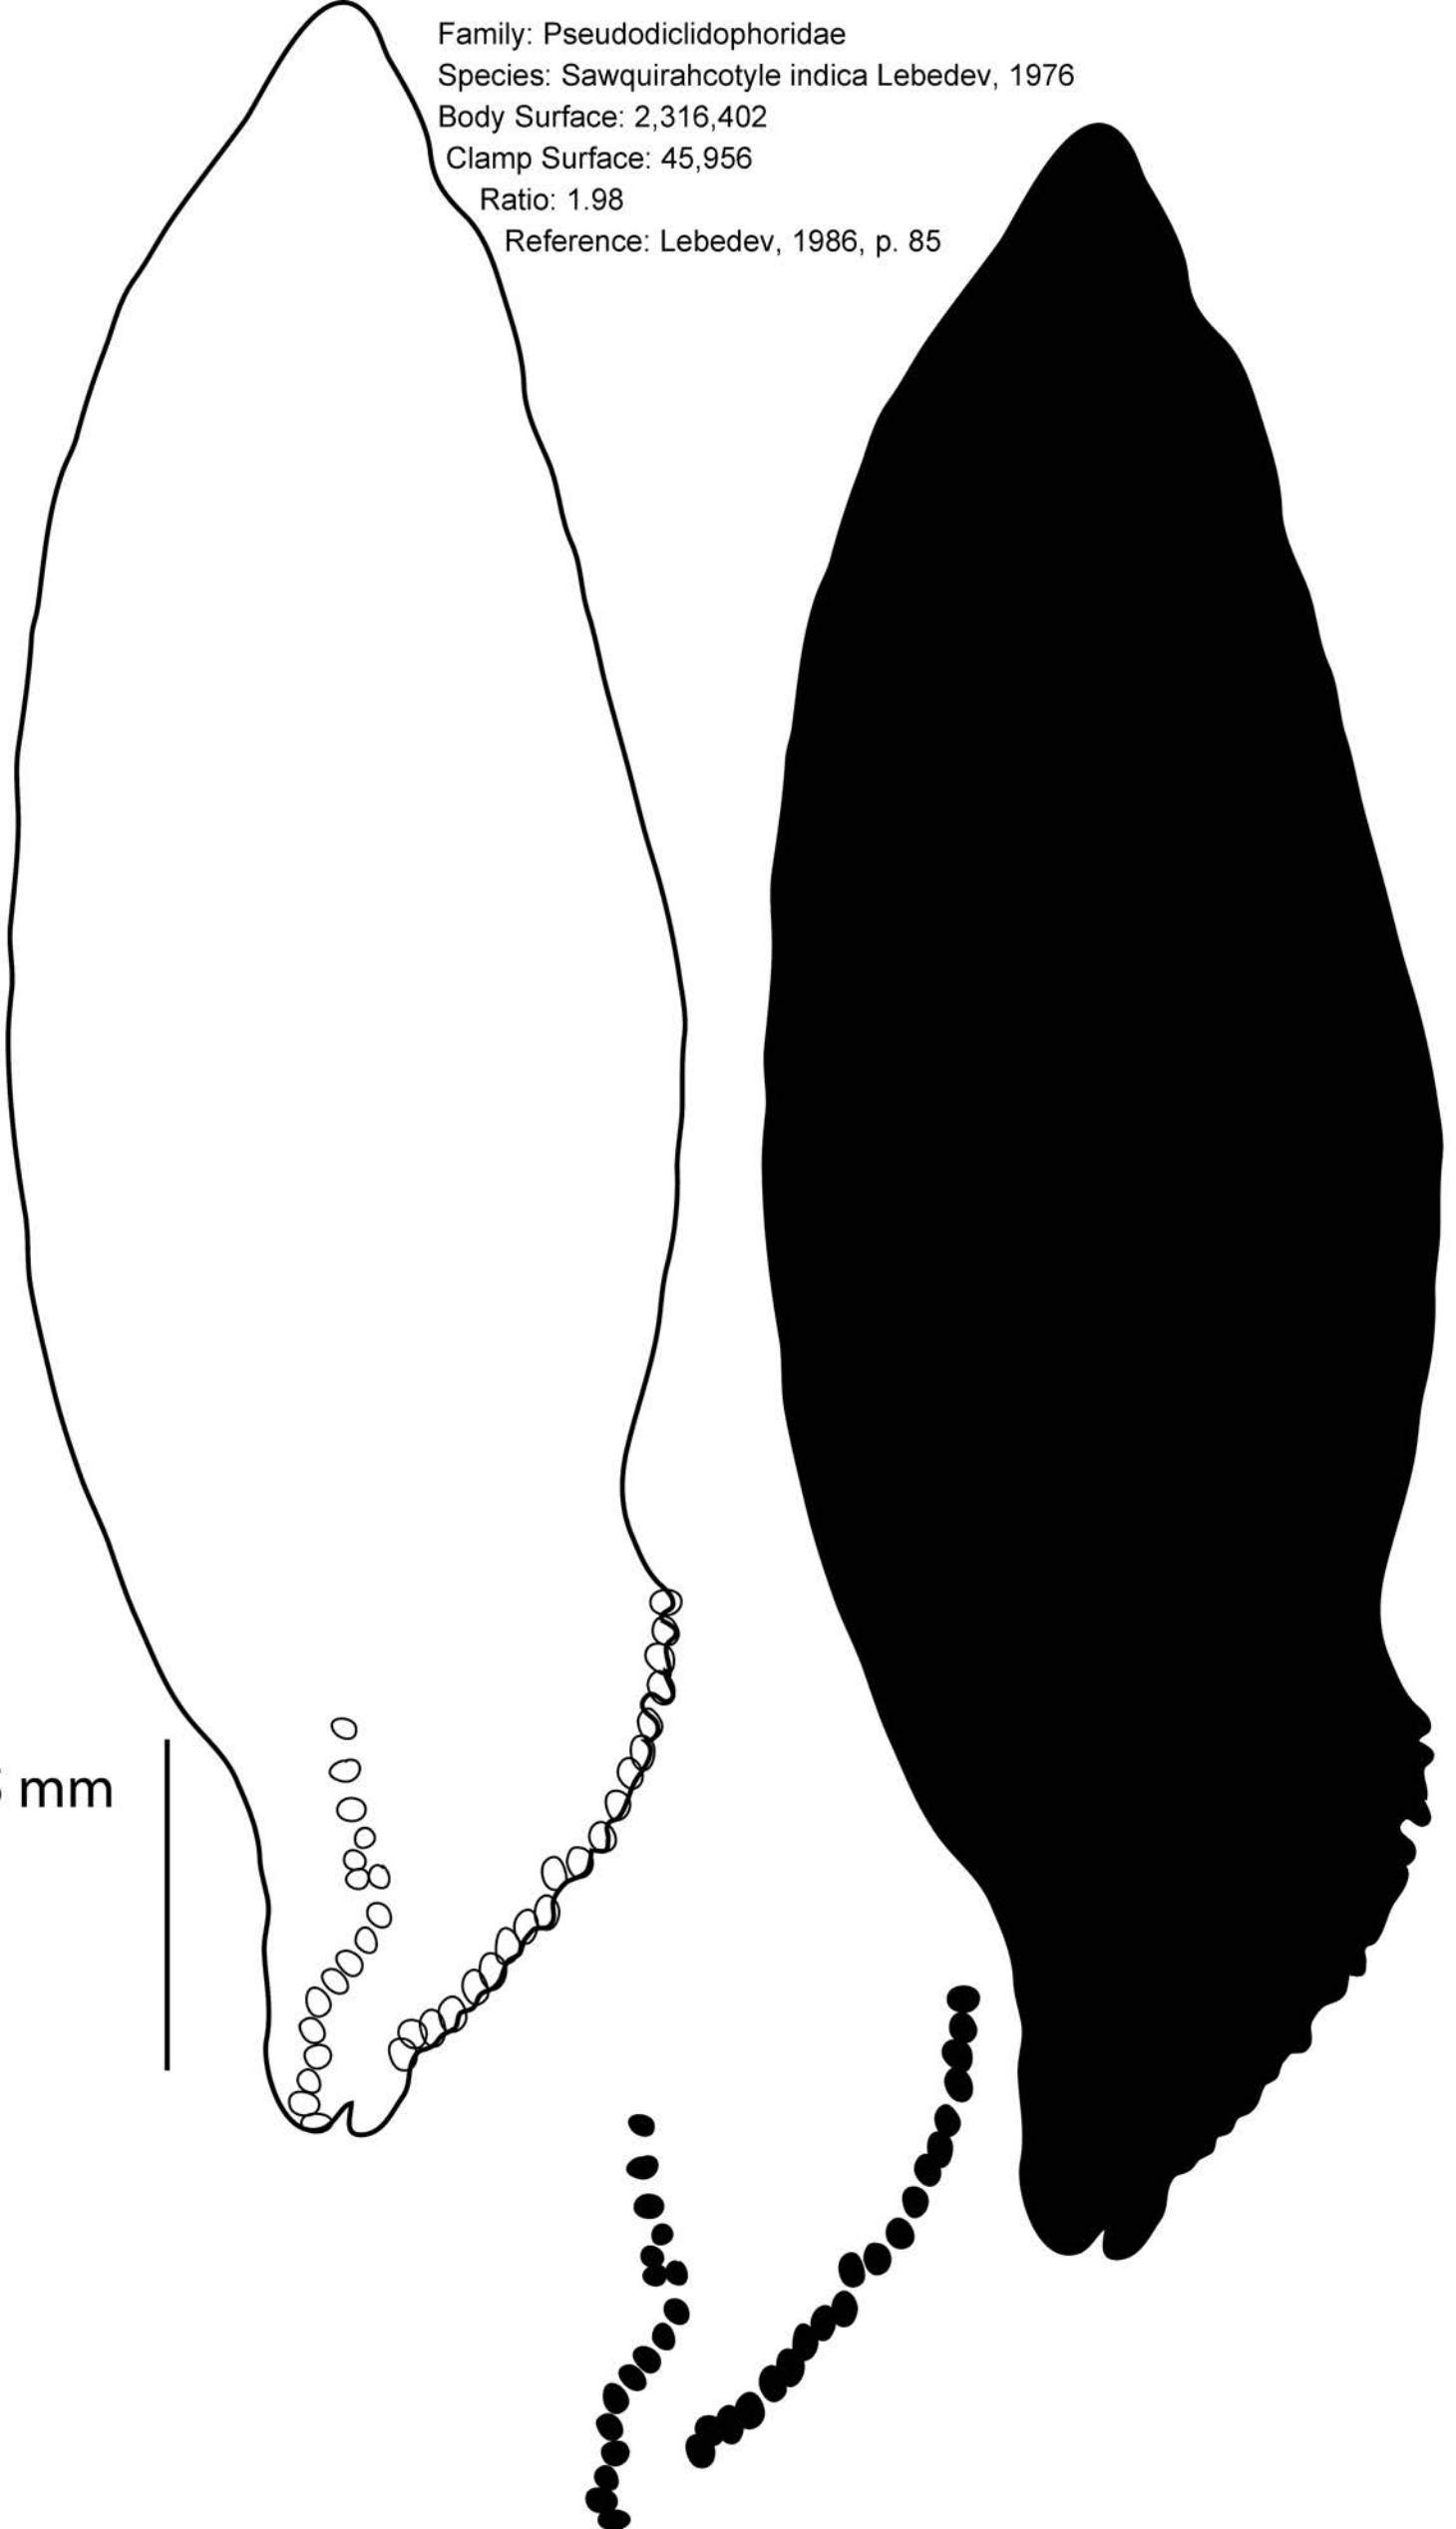



Family: Pseudodidolophoridae

Species: *Winkenthughesia australis* Robinson, 1961

Body Surface: 8,558,914

Clamp Surface: 244,842

Ratio: 2.86

Reference: Robinson, 1961, p. 261

1 mm

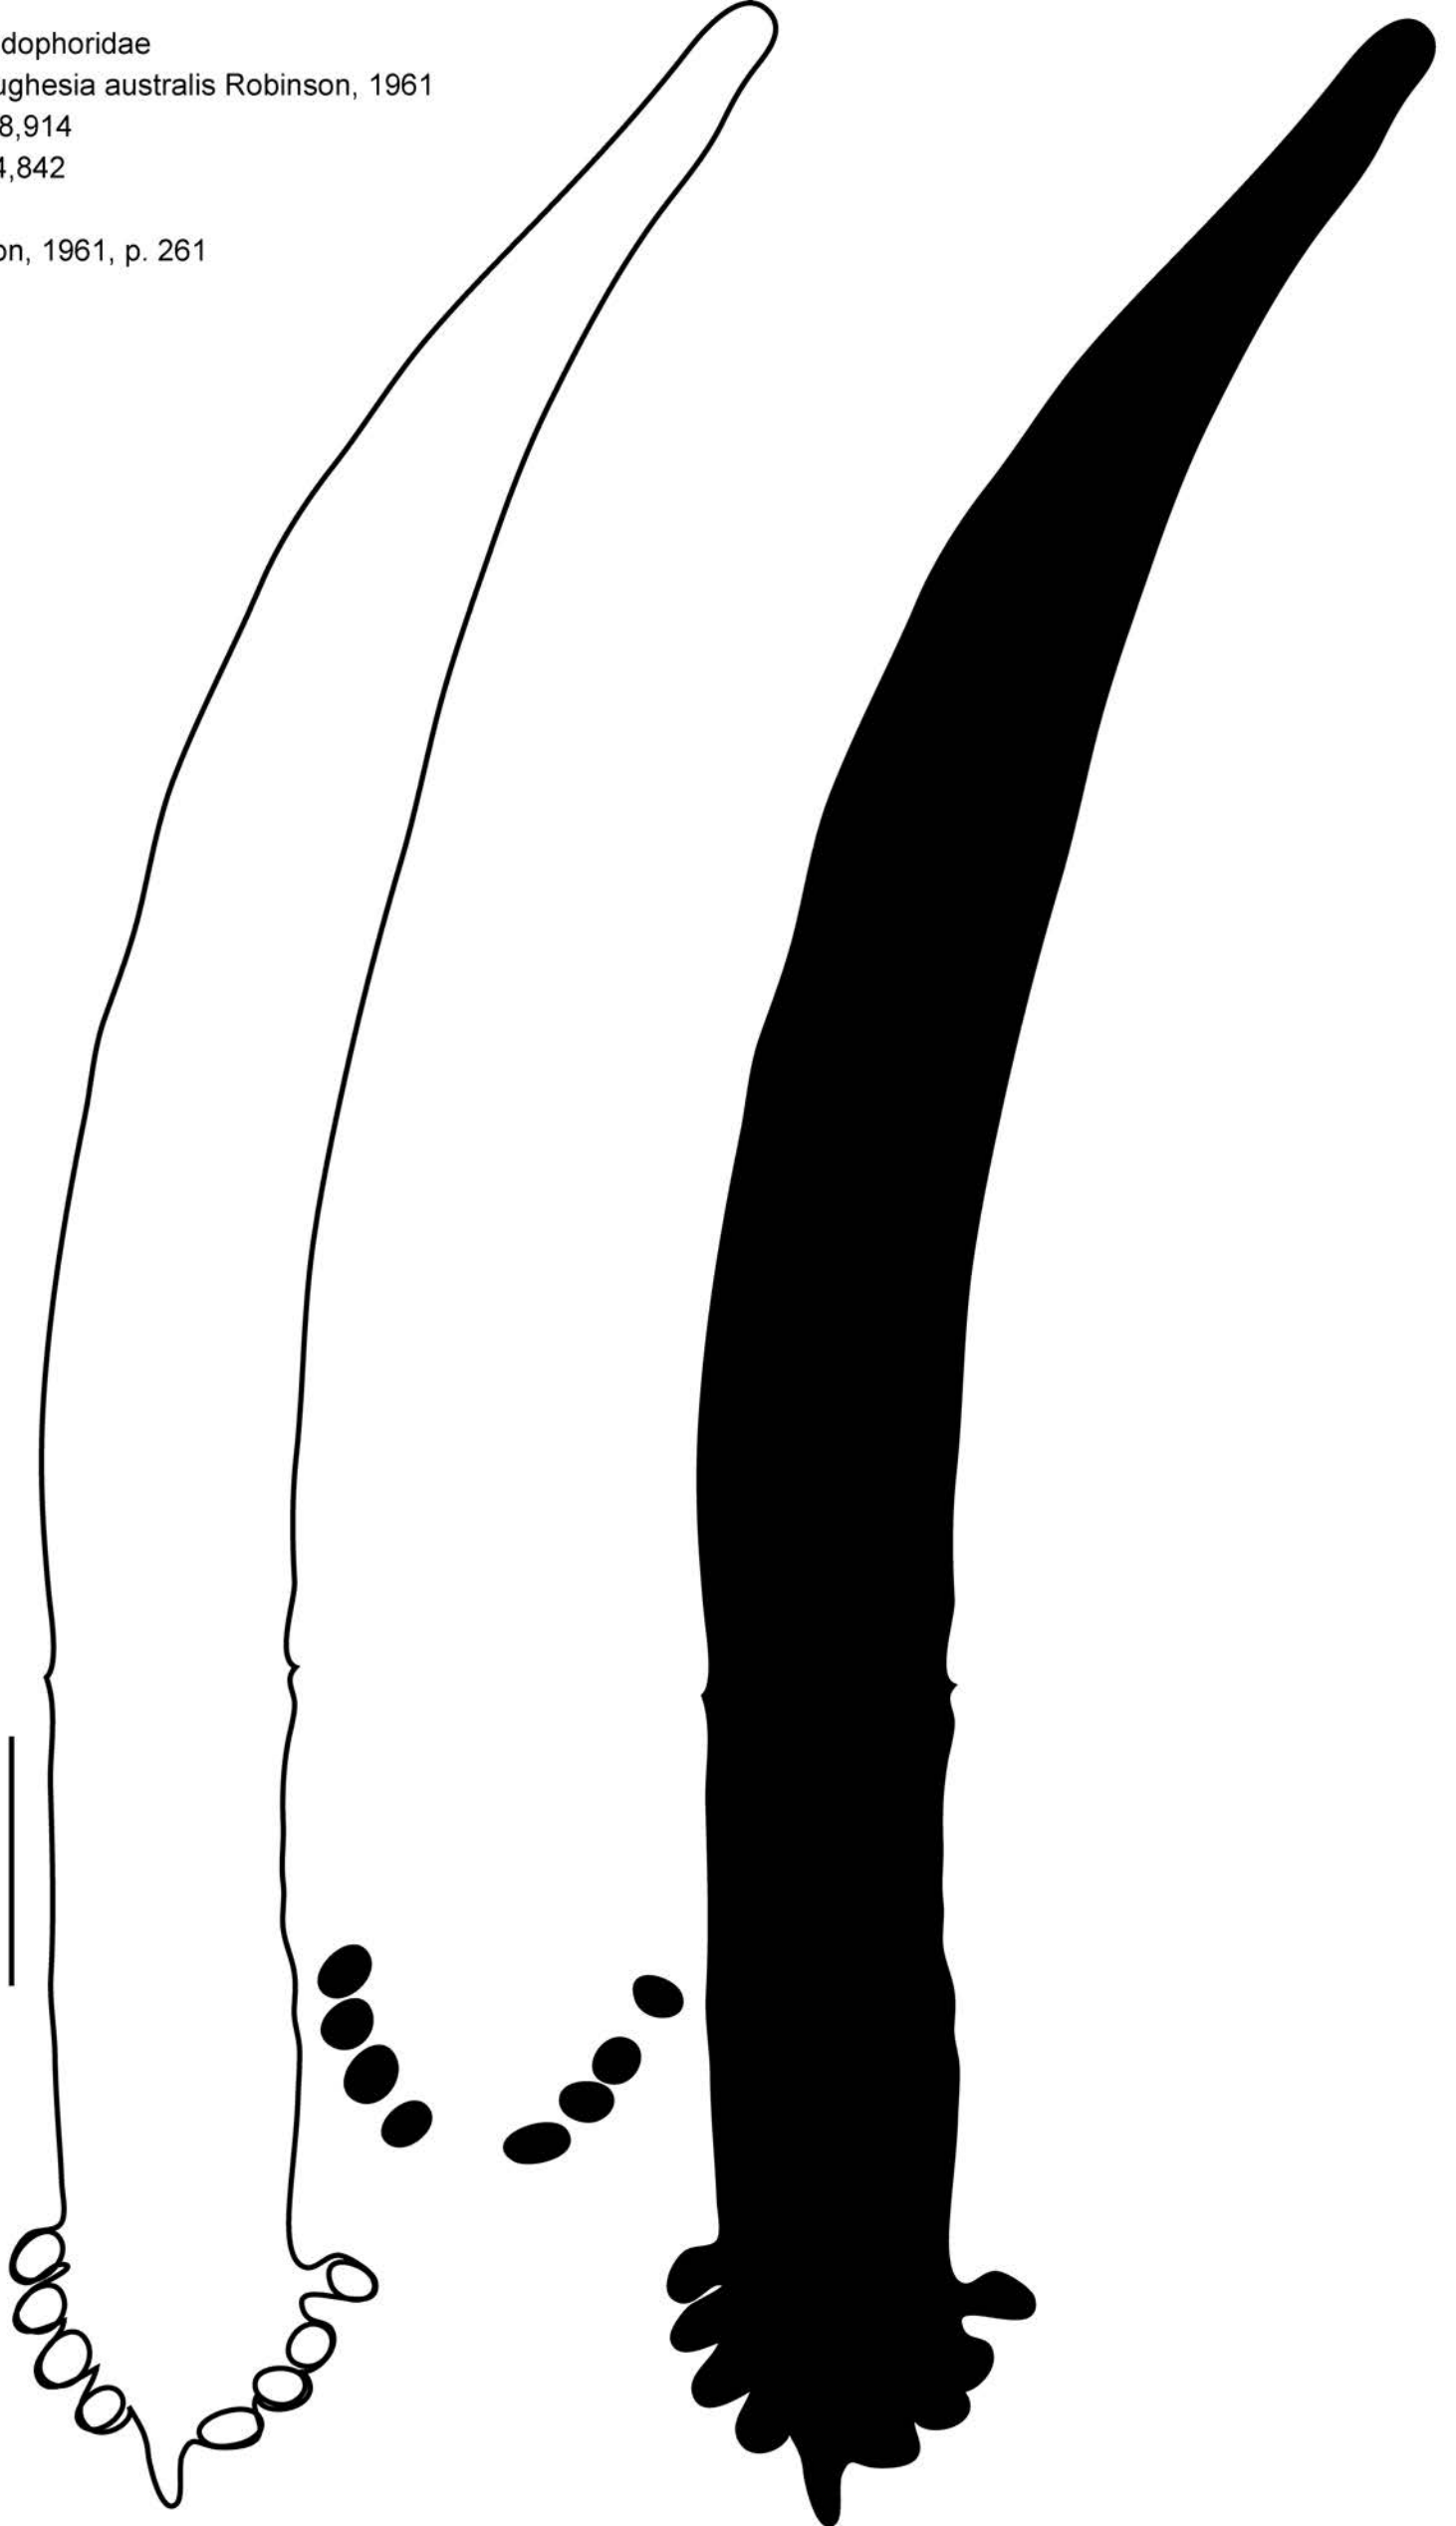

Supplement: pone.0079155.s001.pdf [file pone.0079155.s001.pdf]
